# Supplementary material
Source: MDPI journal article supplement (https://www.mdpi.com/2072-4292/12/14/2208)
Supplement: s1 [file s1]

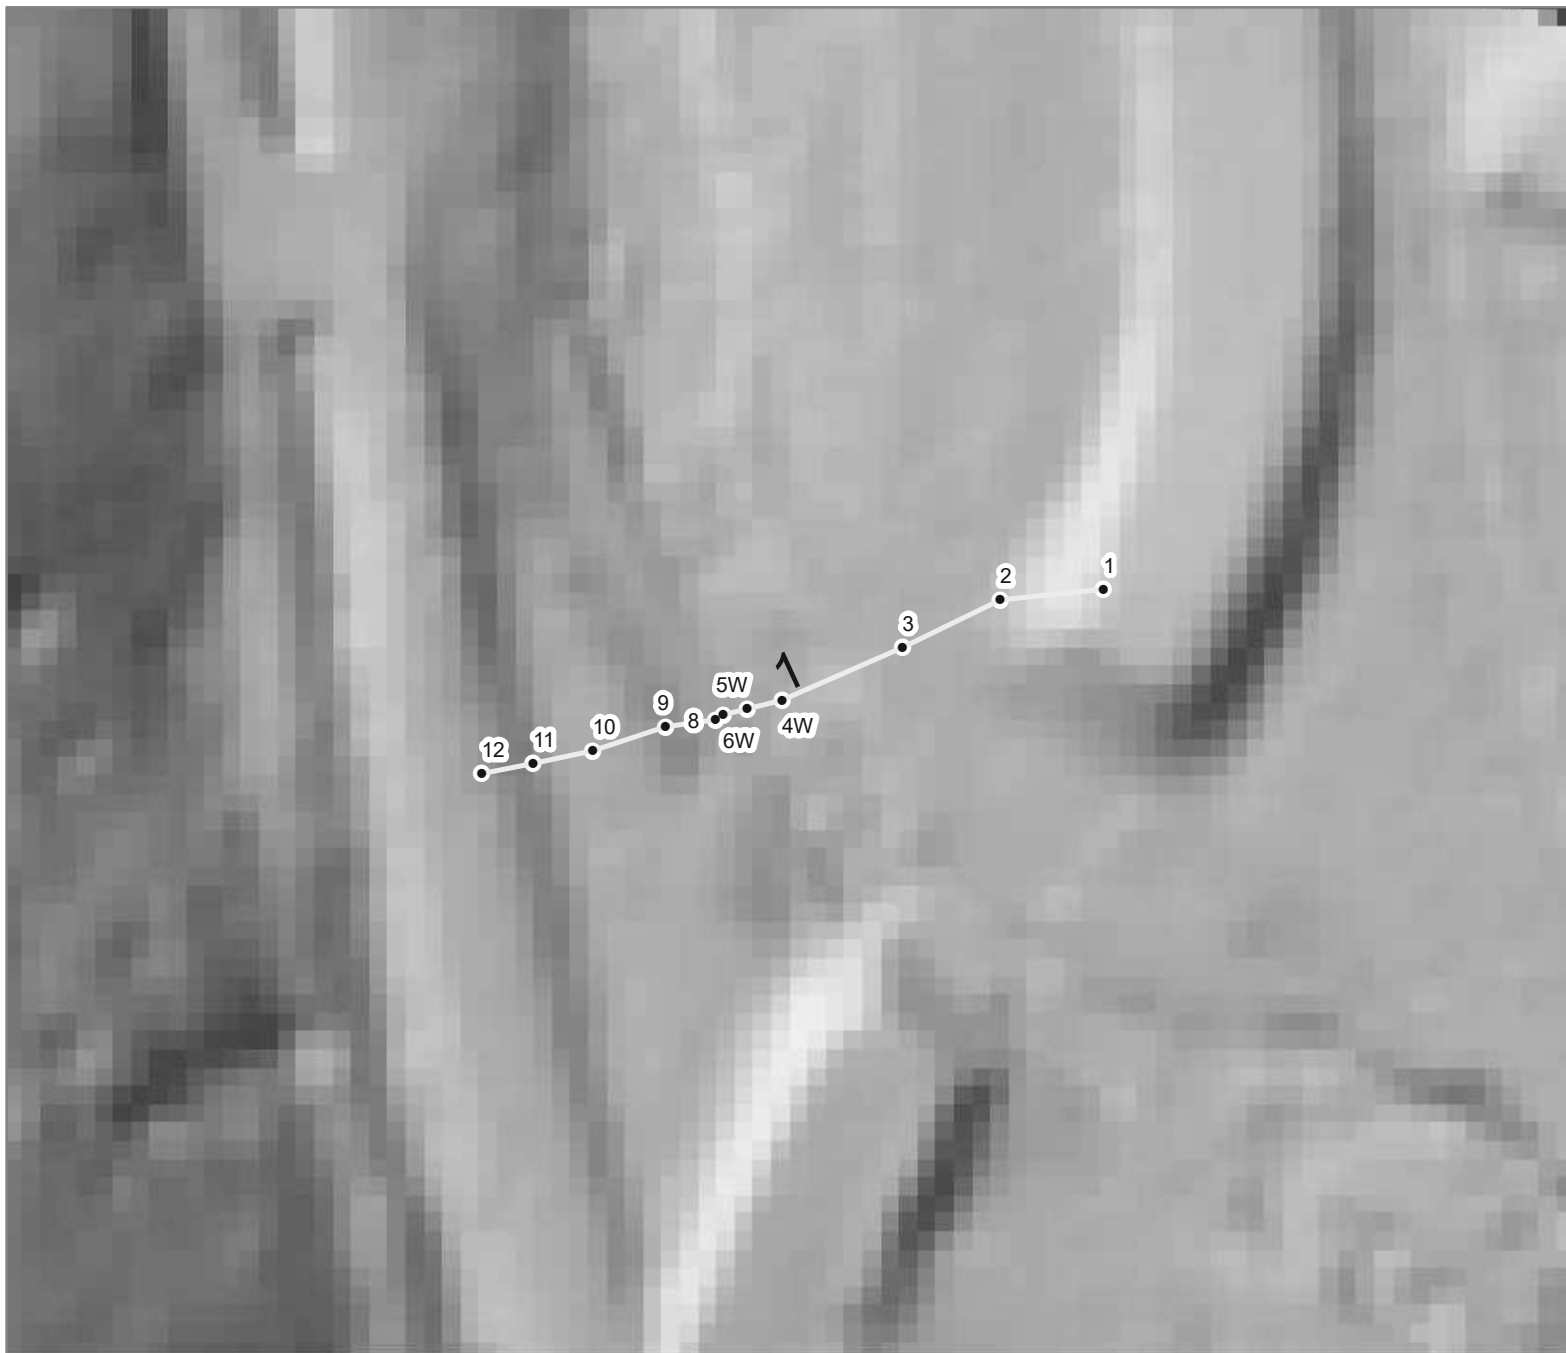

0 10 20 m

*Proile: 1*

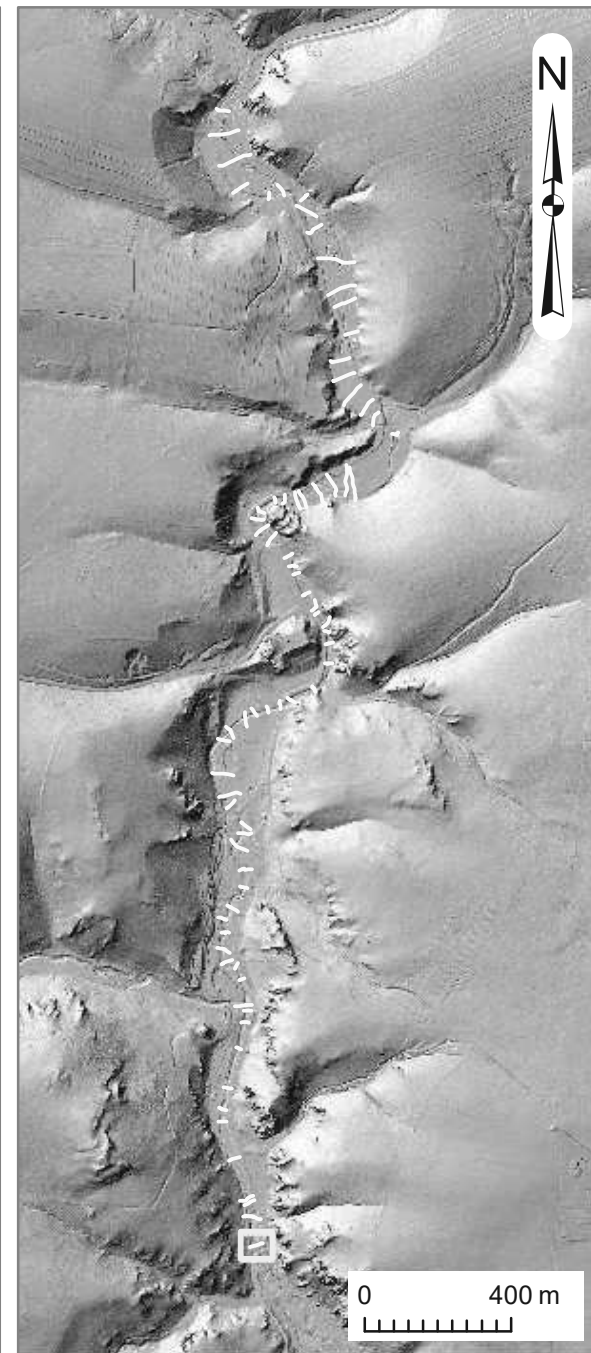

Analyses of the Prądnik riverbed shape based on archiva and contemporary data sets – old maps, LIDAR, DTMs and cross-sectional profile

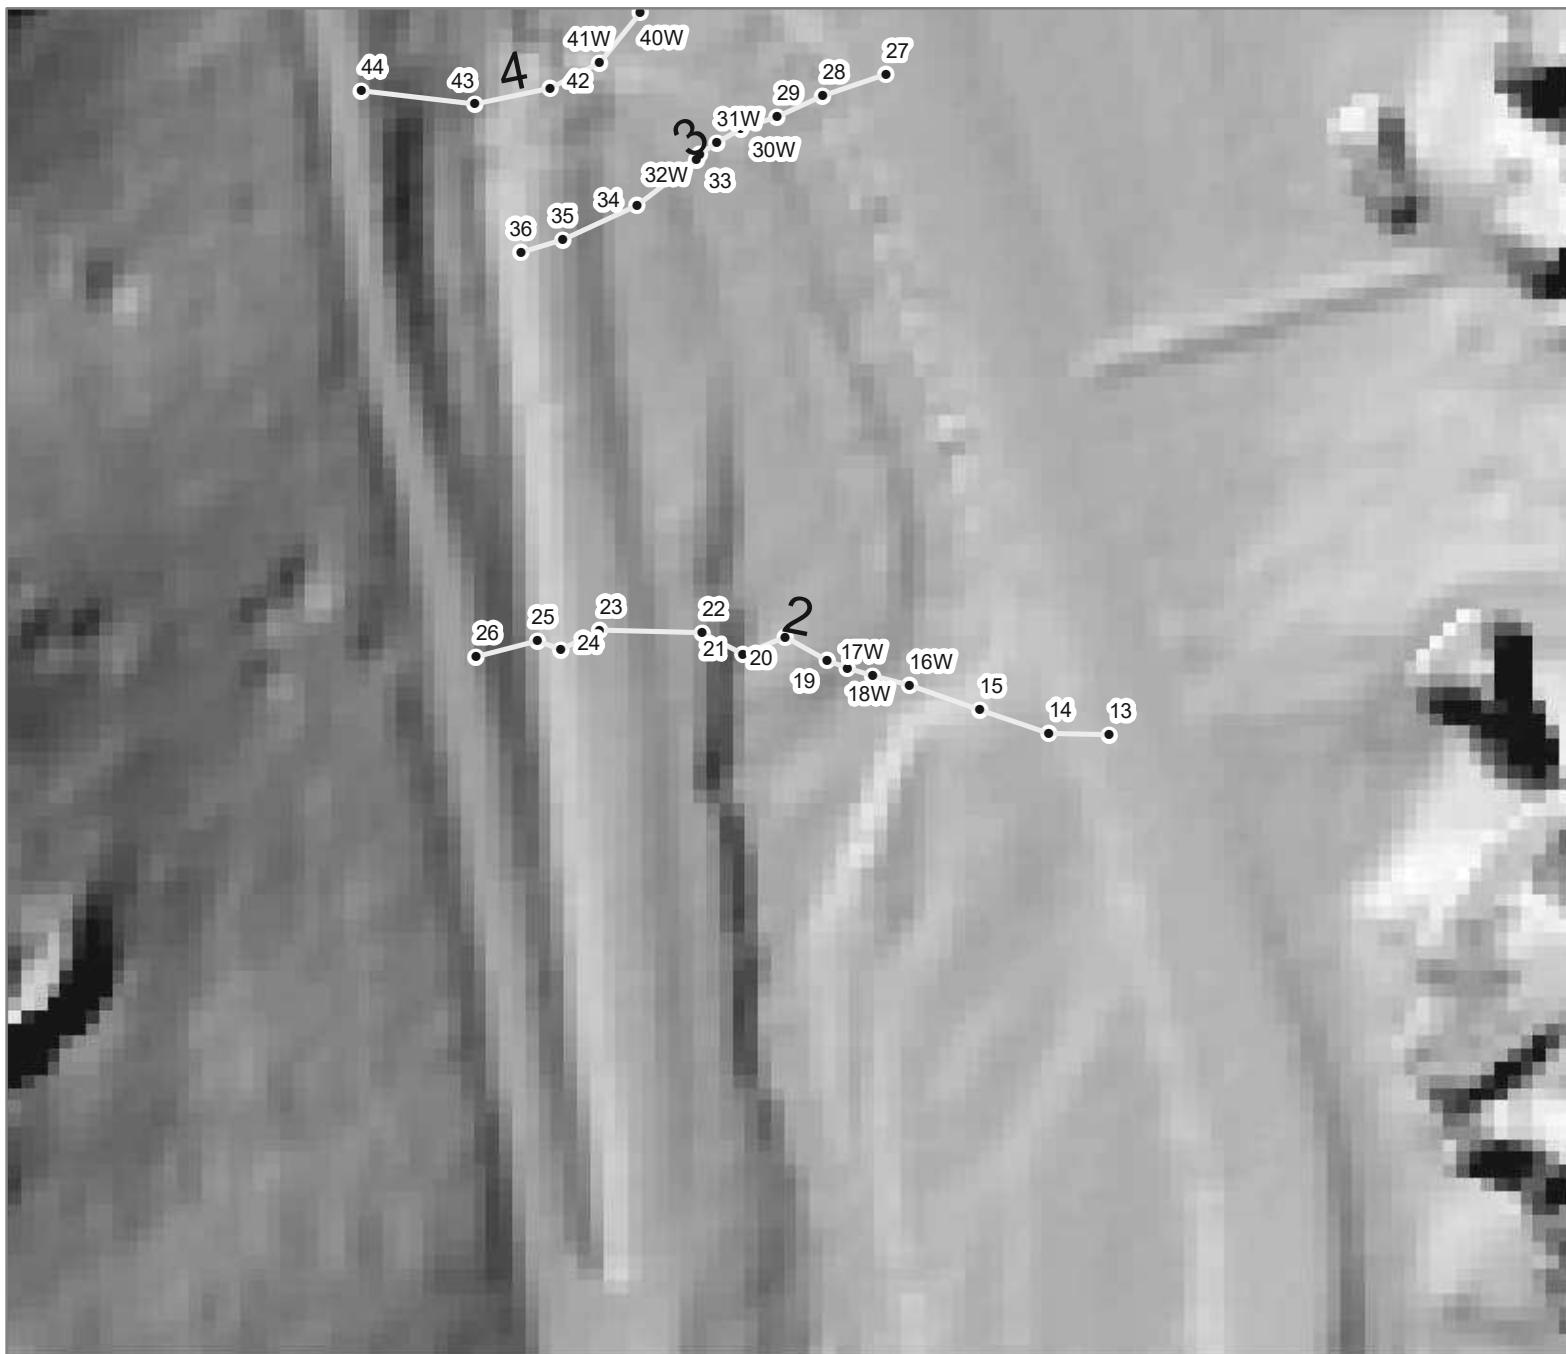

0 10 20 m

## Proile: 2

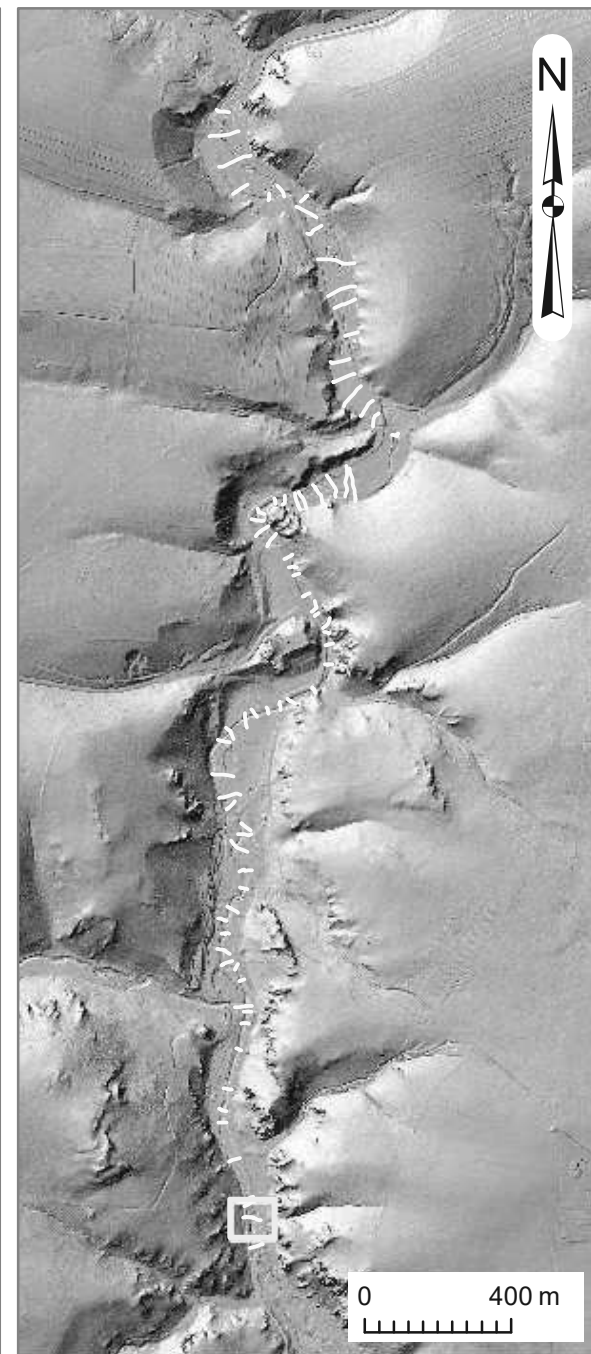

Analyses of the Prądnik riverbed shape based on archiva and contemporary data sets – old maps, LIDAR, DTMs and cross-sectional profile

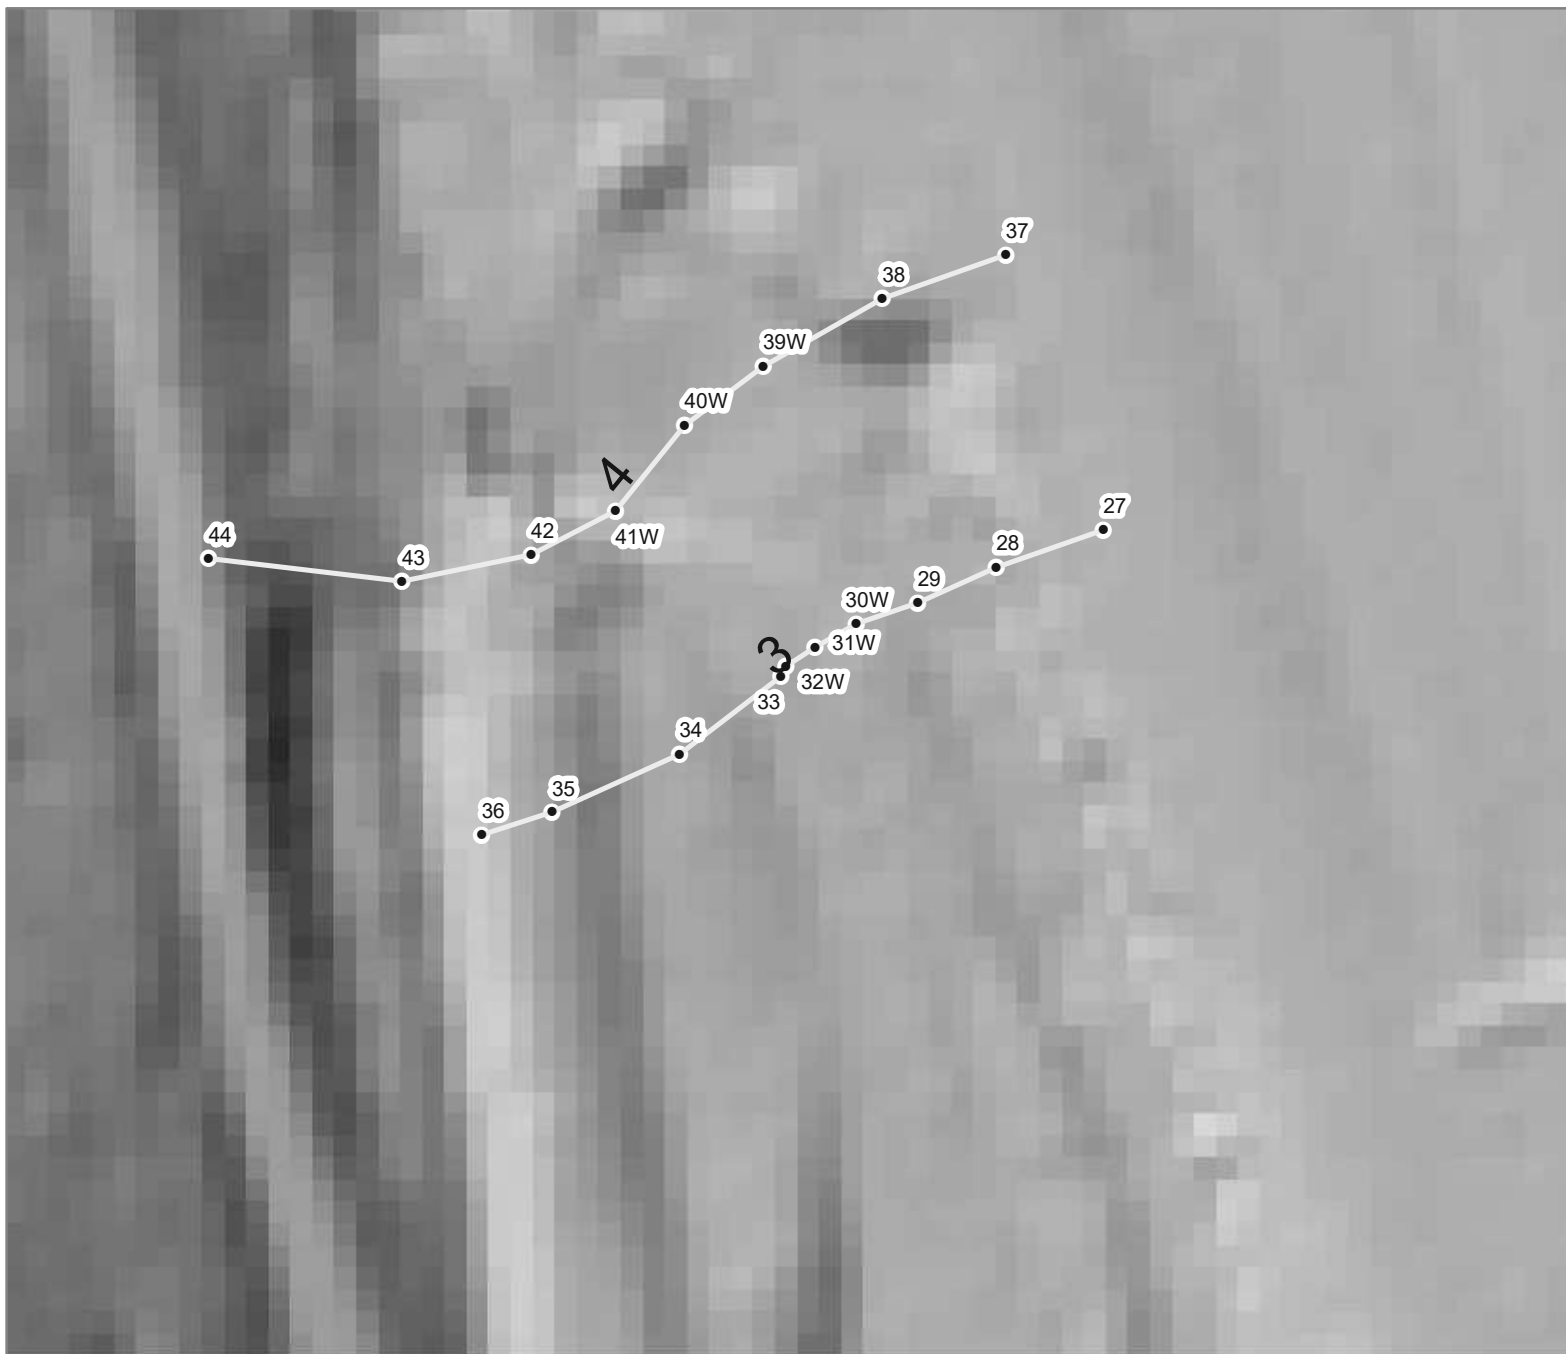

0 10 20 m

*Proile: 3*

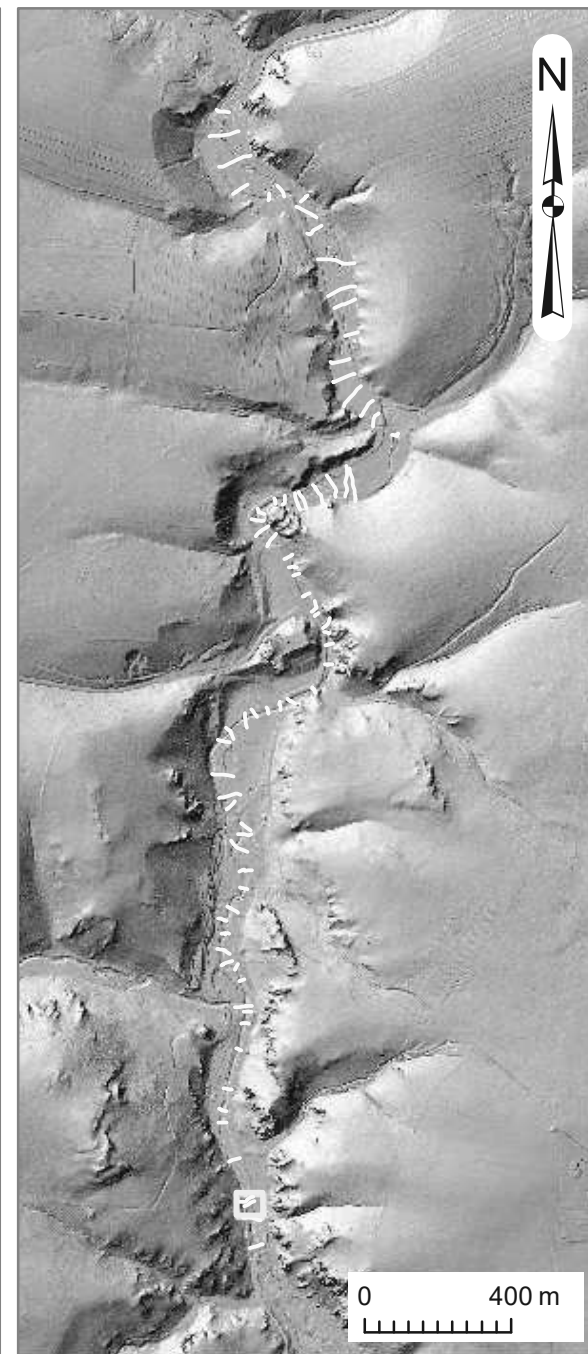

Analyses of the Prądnik riverbed shape based on archiva and contemporary data sets – old maps, LIDAR, DTMs and cross-sectional profile

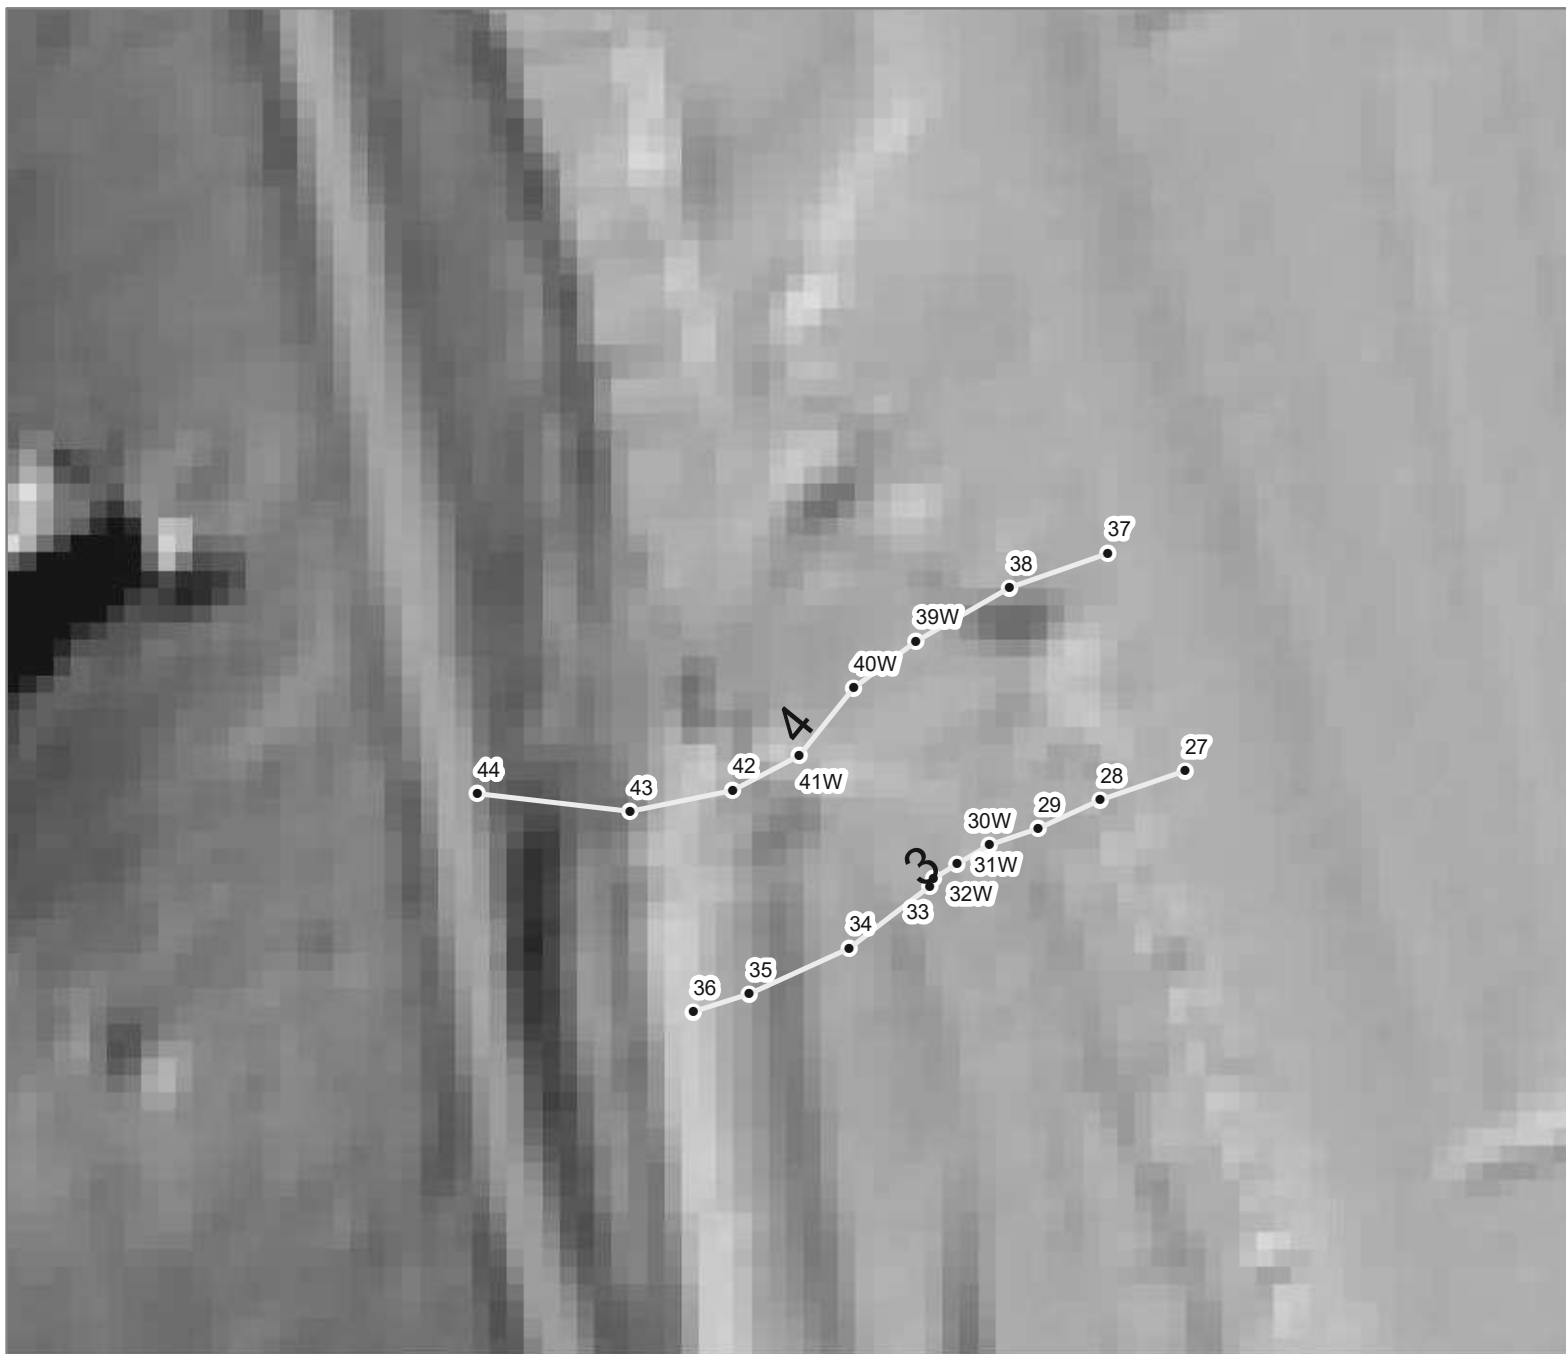

0 10 20 m

*Proile: 4*

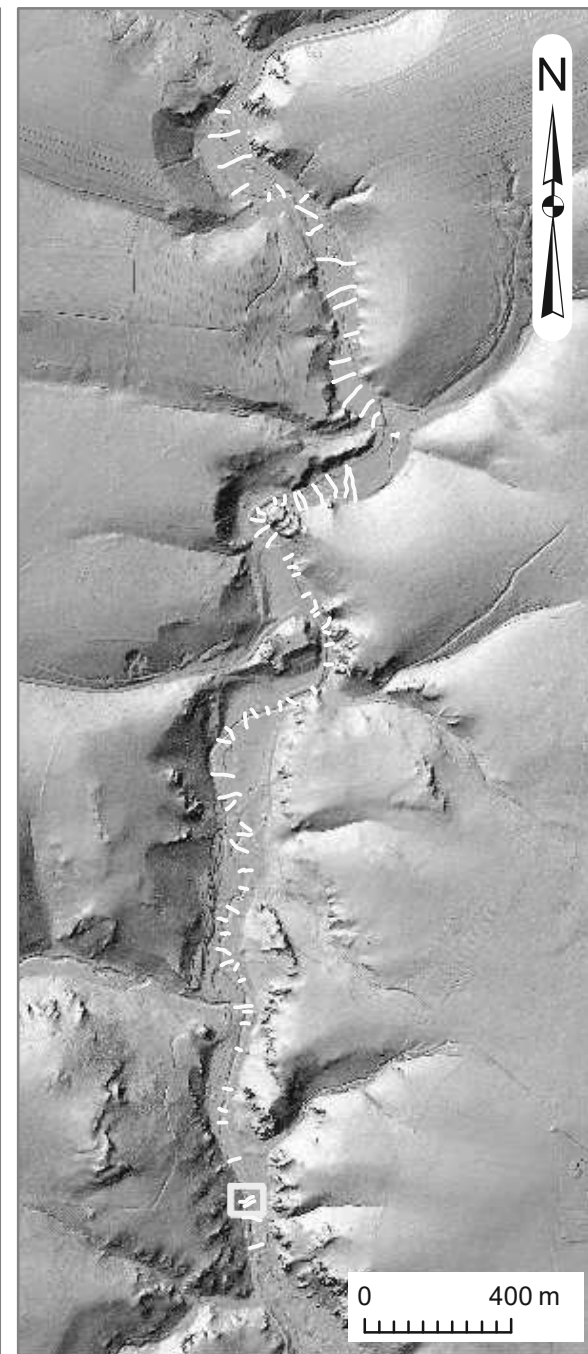

Analyses of the Prądnik riverbed shape based on archiva and contemporary data sets – old maps, LIDAR, DTMs and cross-sectional profile

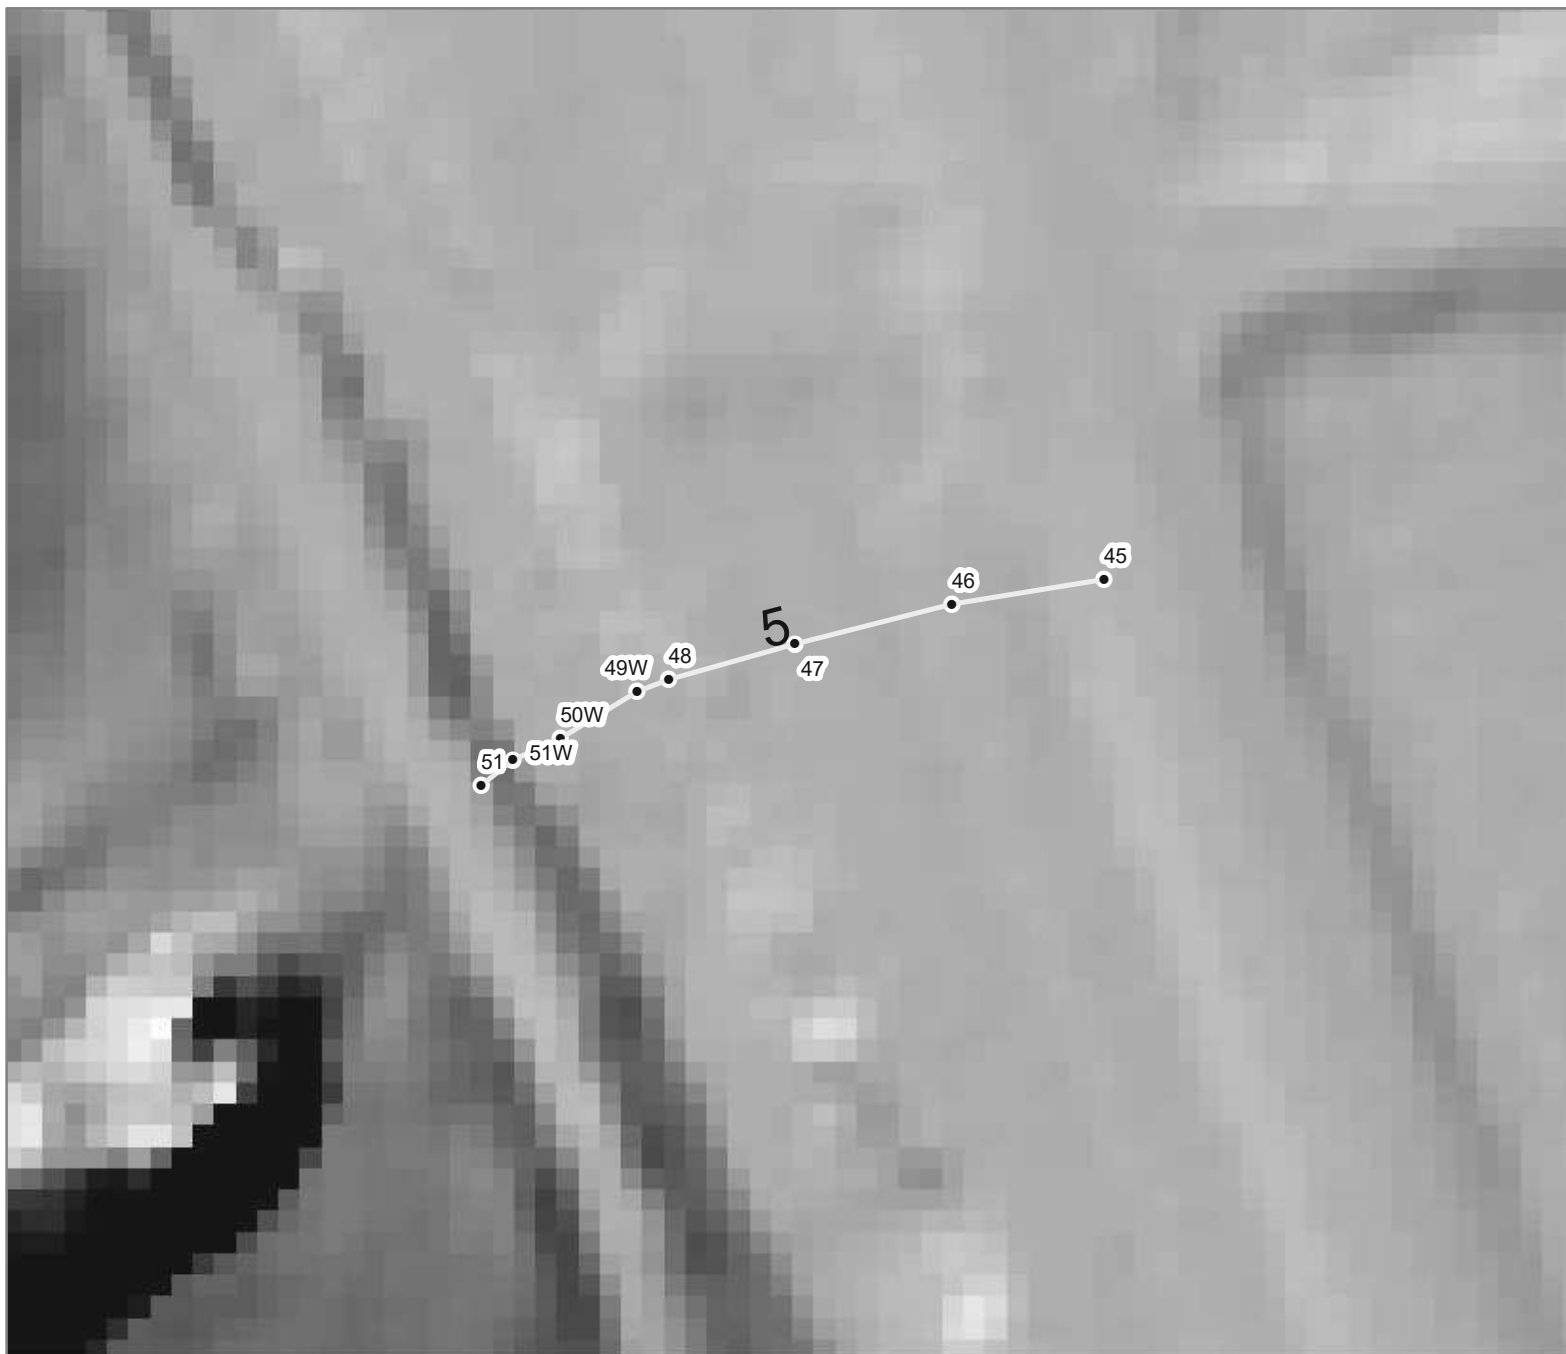

0 10 20 m

*Proile: 5*

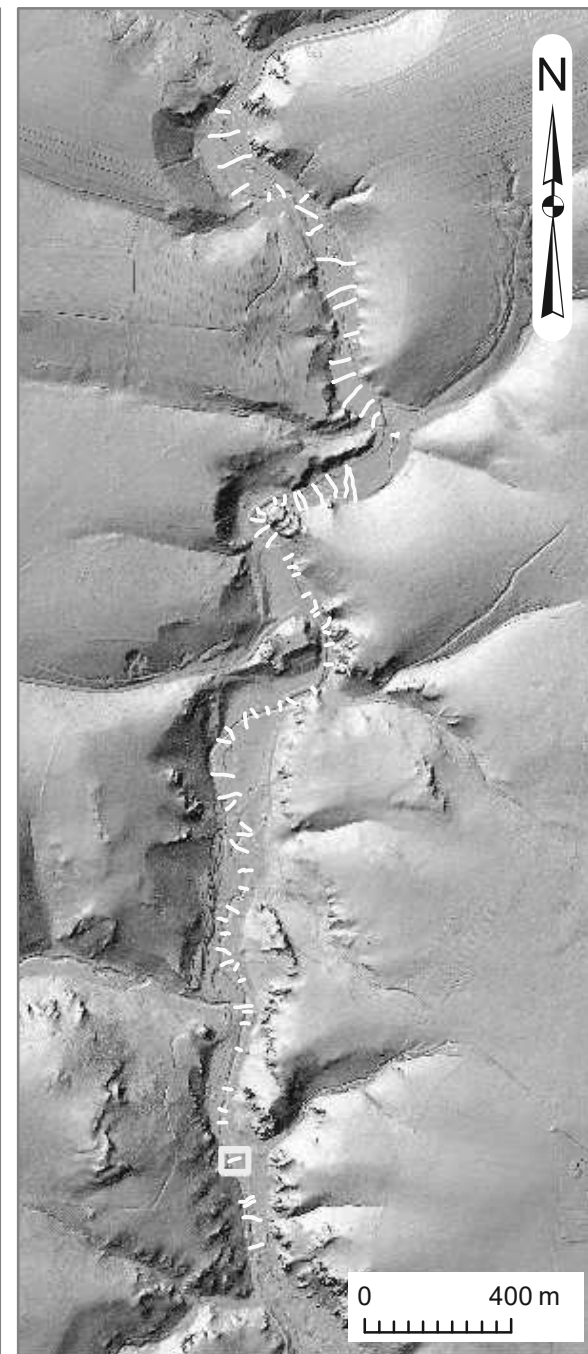

Analyses of the Prądnik riverbed shape based on archiva and contemporary data sets – old maps, LIDAR, DTMs and cross-sectional profile

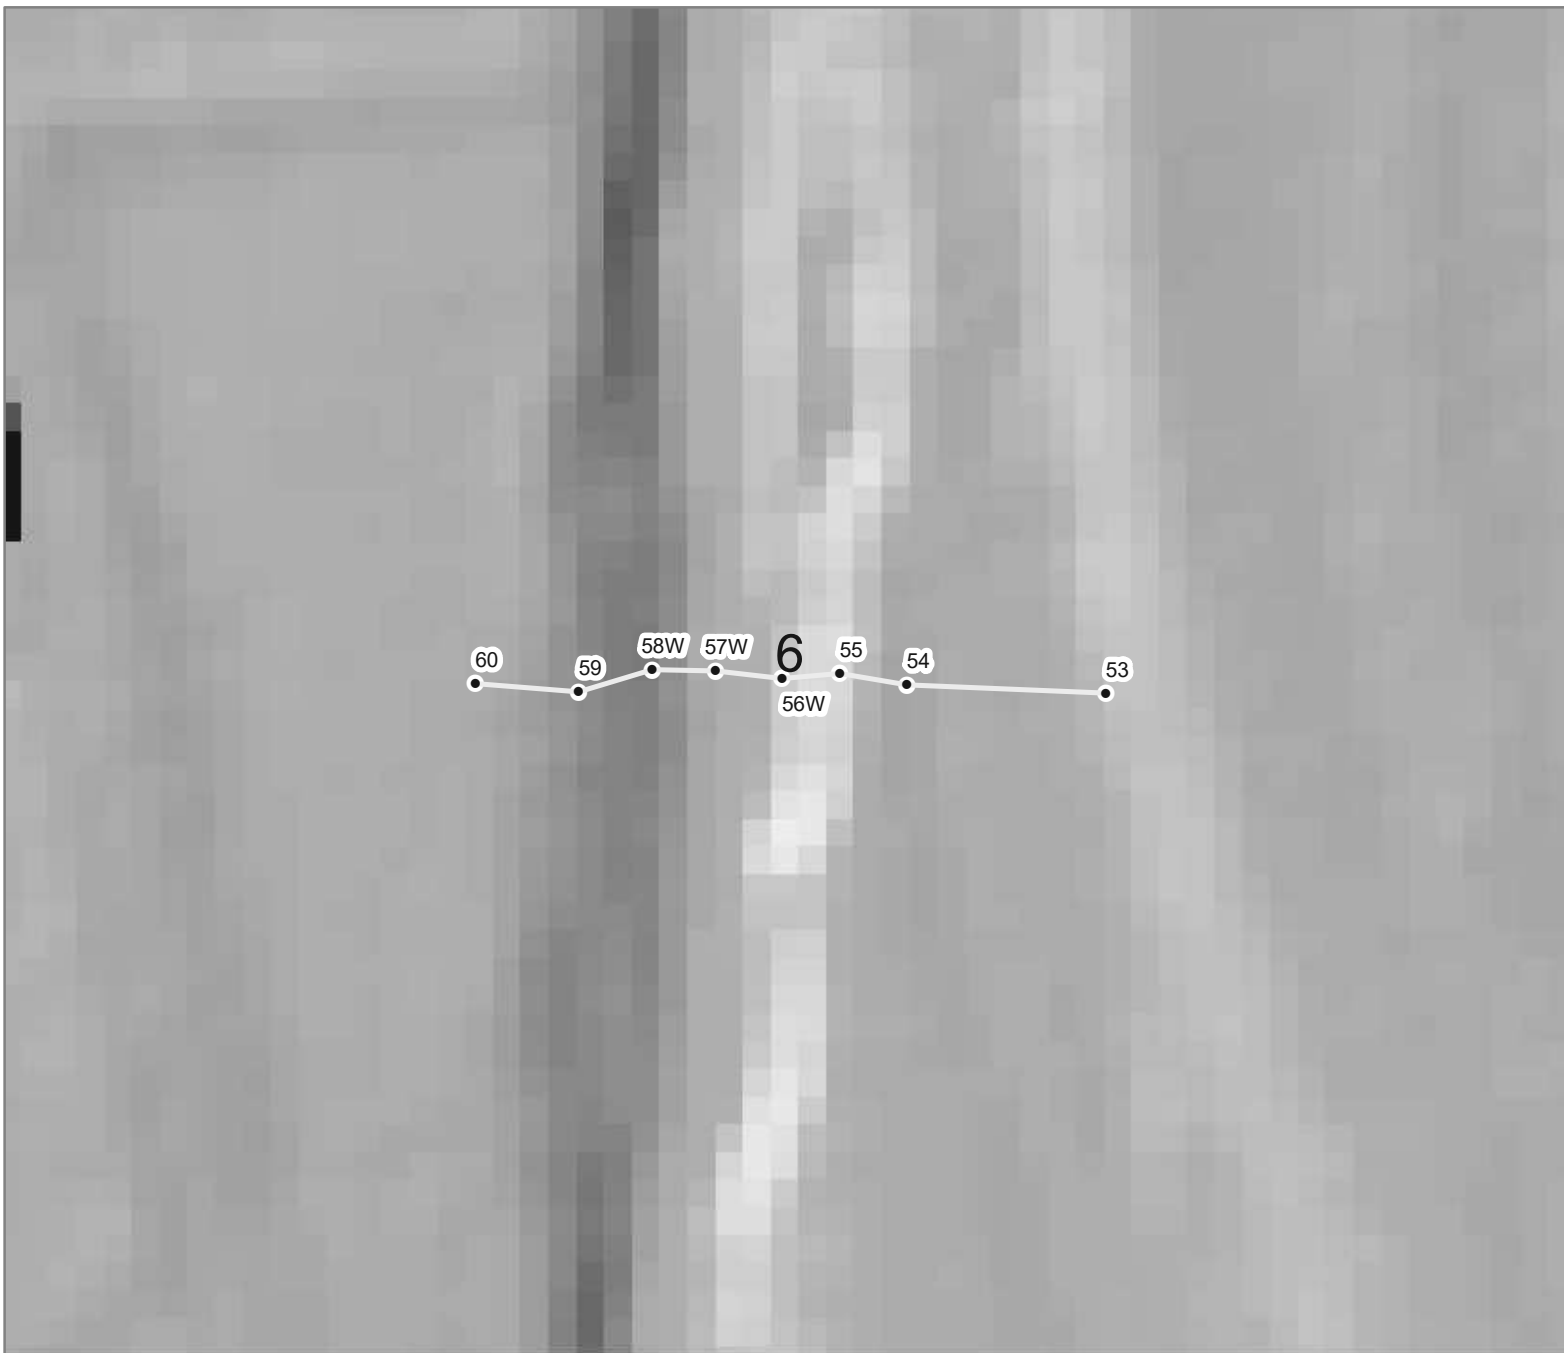

0 10 20 m

## Proile: 6

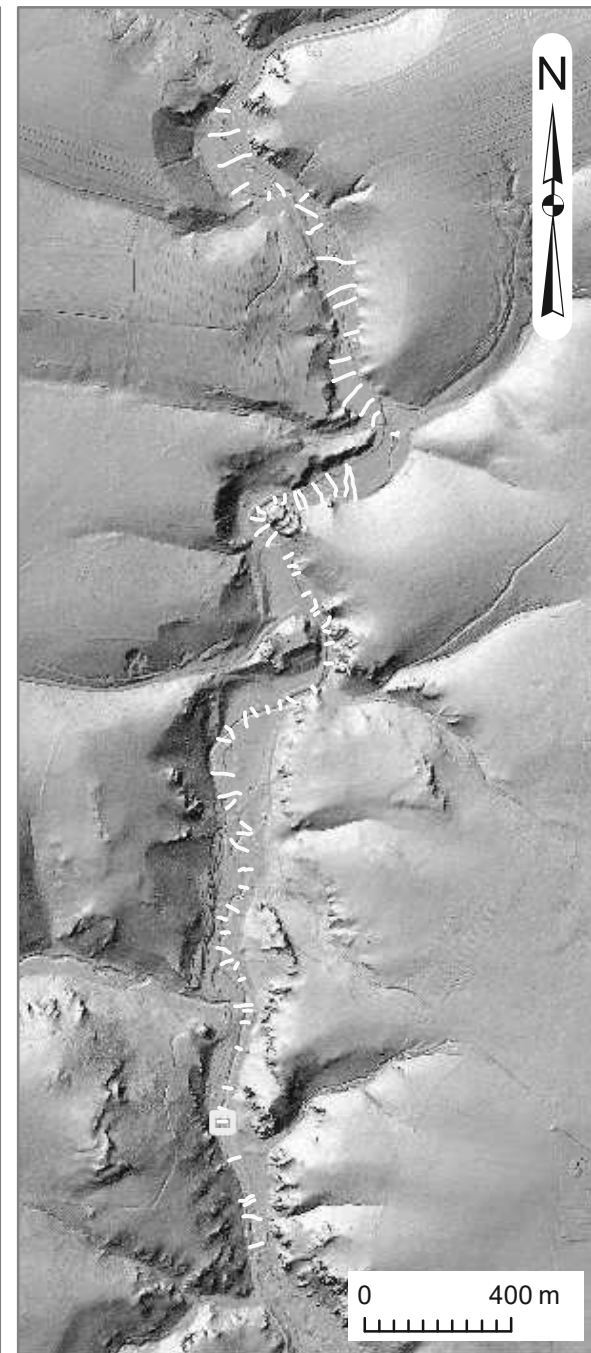

Analyses of the Prądnik riverbed shape based on archiva and contemporary data sets – old maps, LIDAR, DTMs and cross-sectional profile



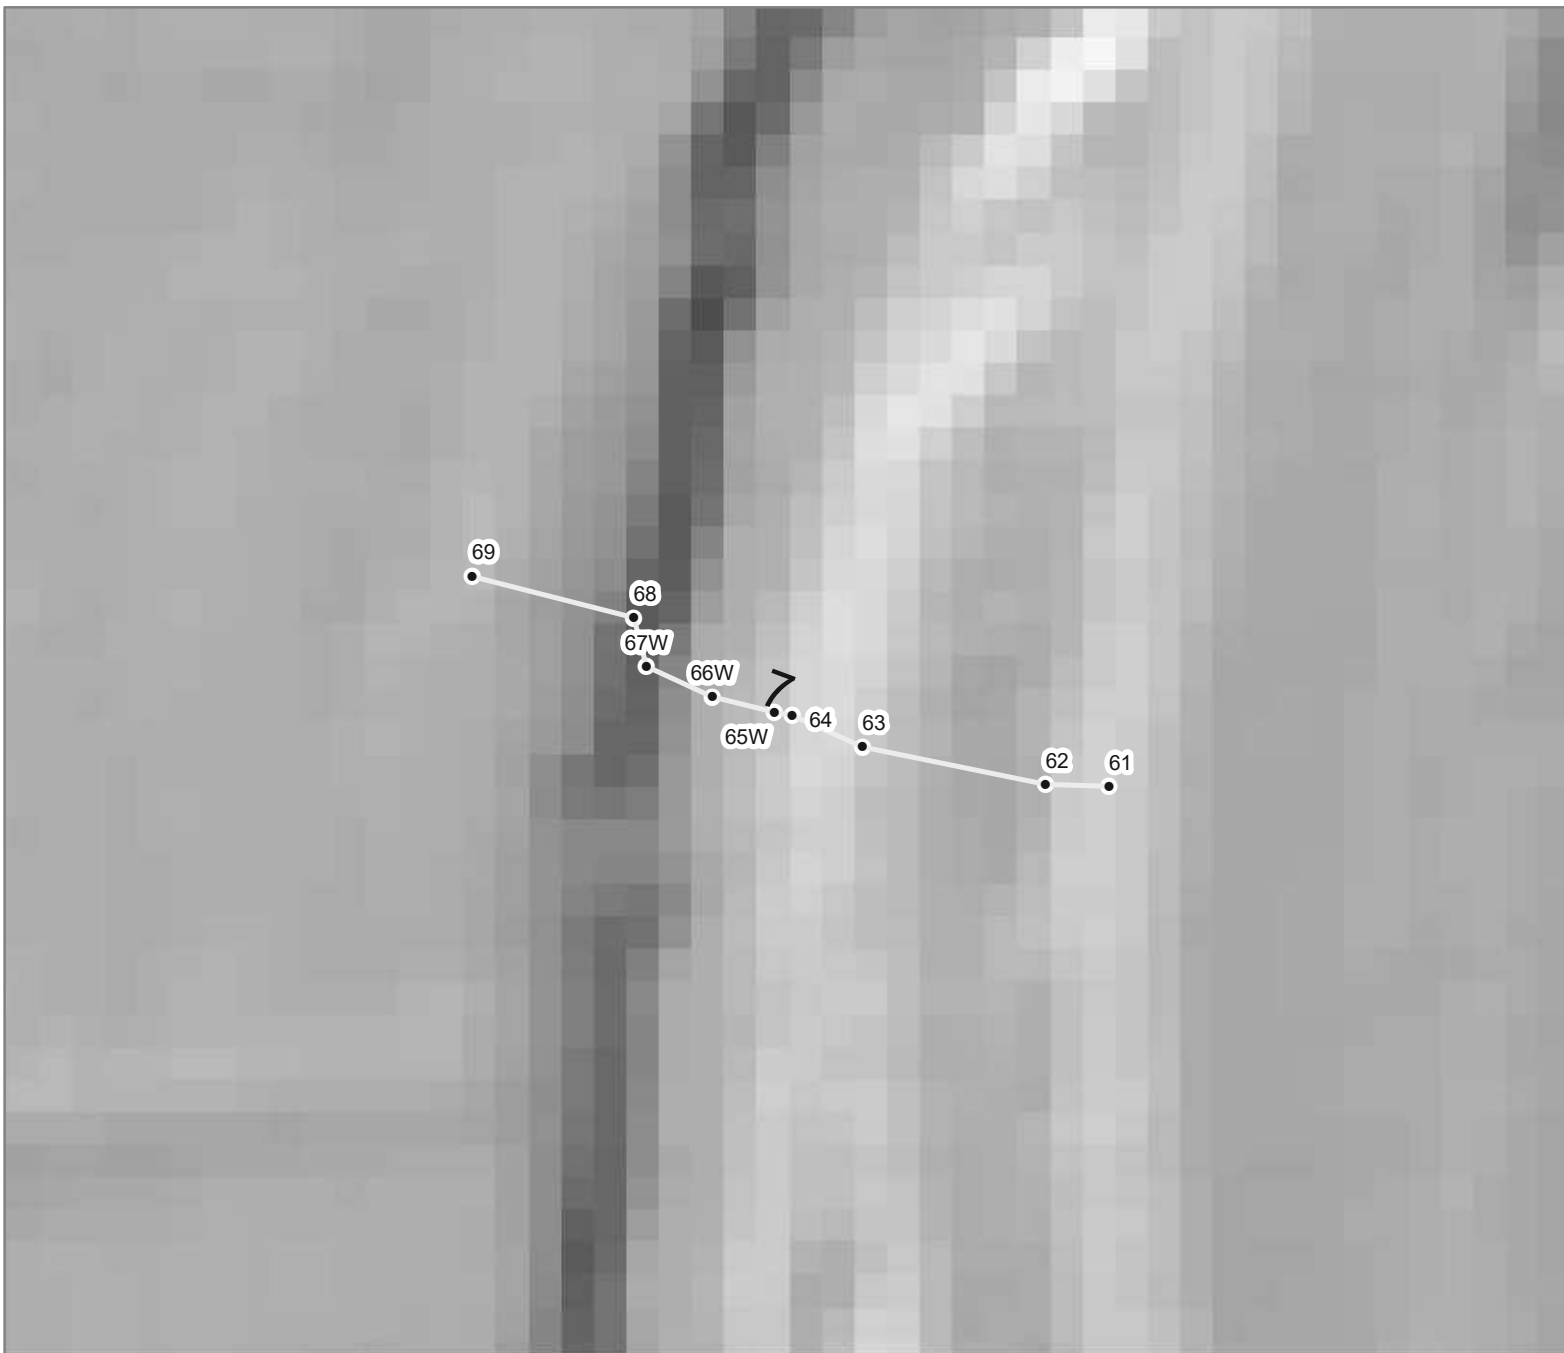

0 10 20 m

*Proile: 7*

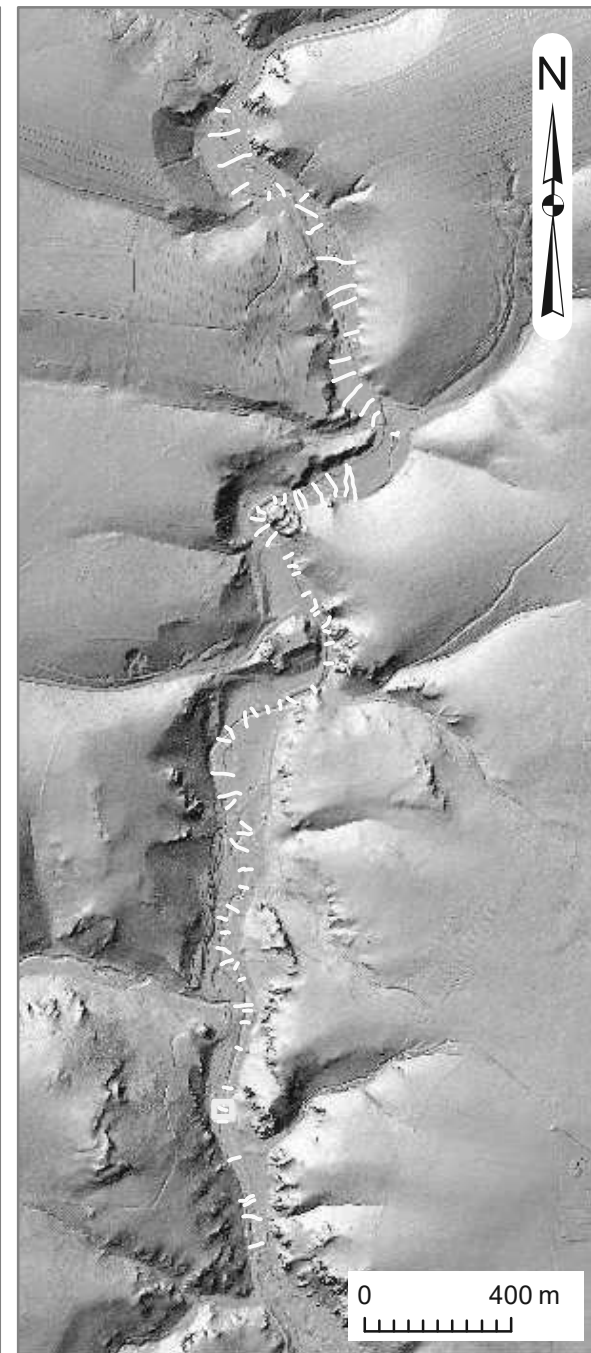

0 400 m

*Analyses of the Prądnik riverbed shape based on archiva and contemporary data sets – old maps, LIDAR, DTMs and cross-sectional profile*

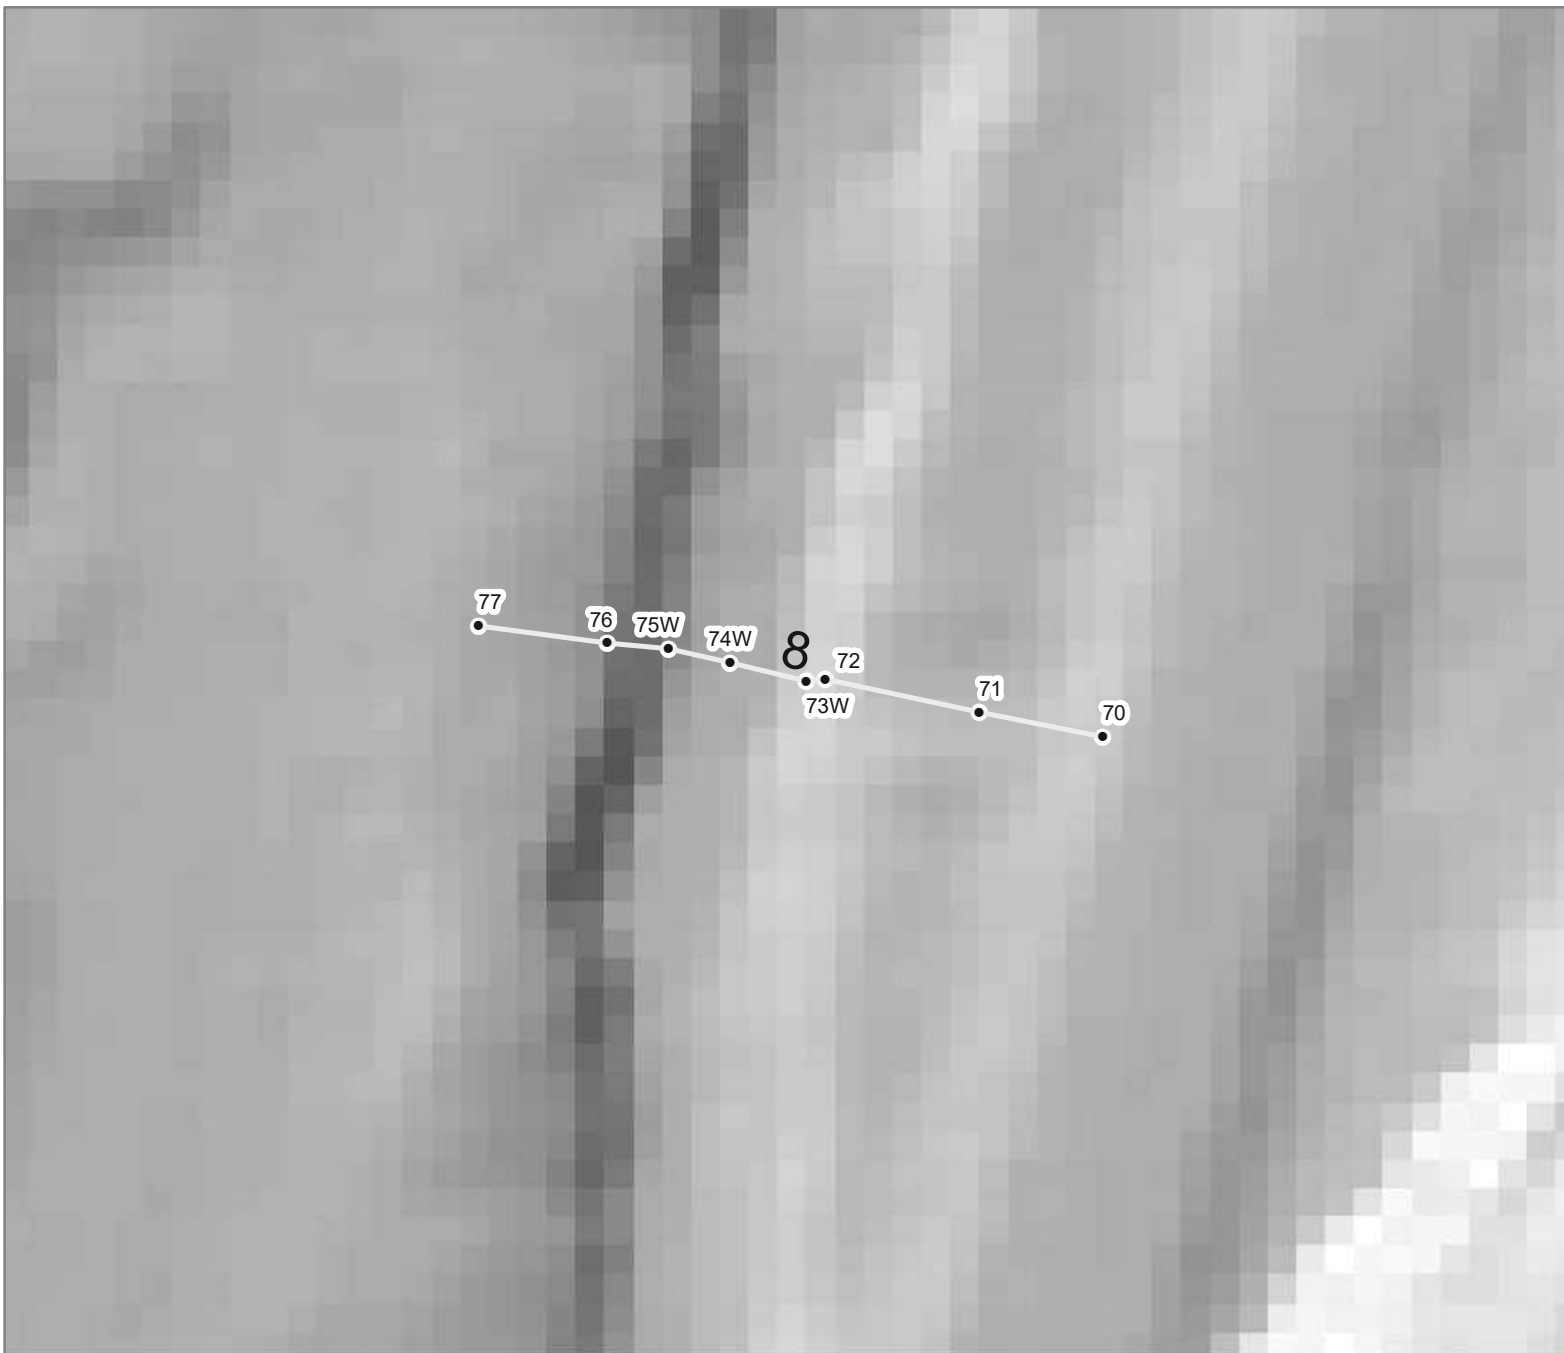

0 10 20 m

*Proile: 8*

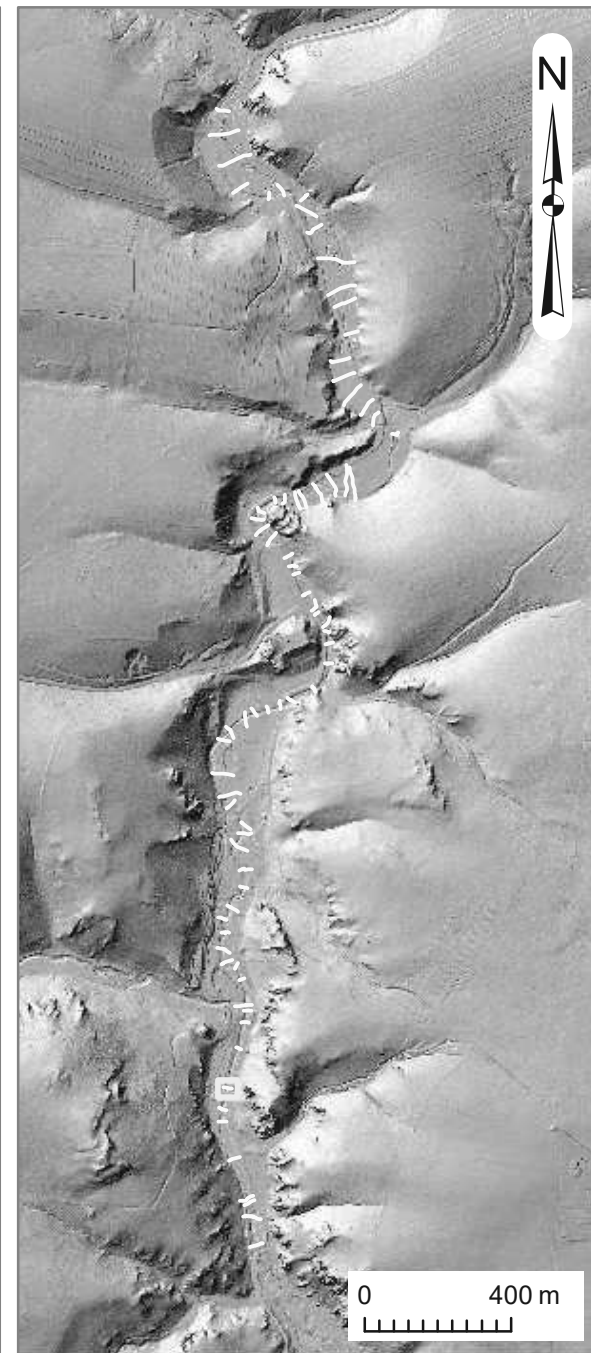

Analyses of the Prądnik riverbed shape based on archiva and contemporary data sets – old maps, LIDAR, DTMs and cross-sectional profile



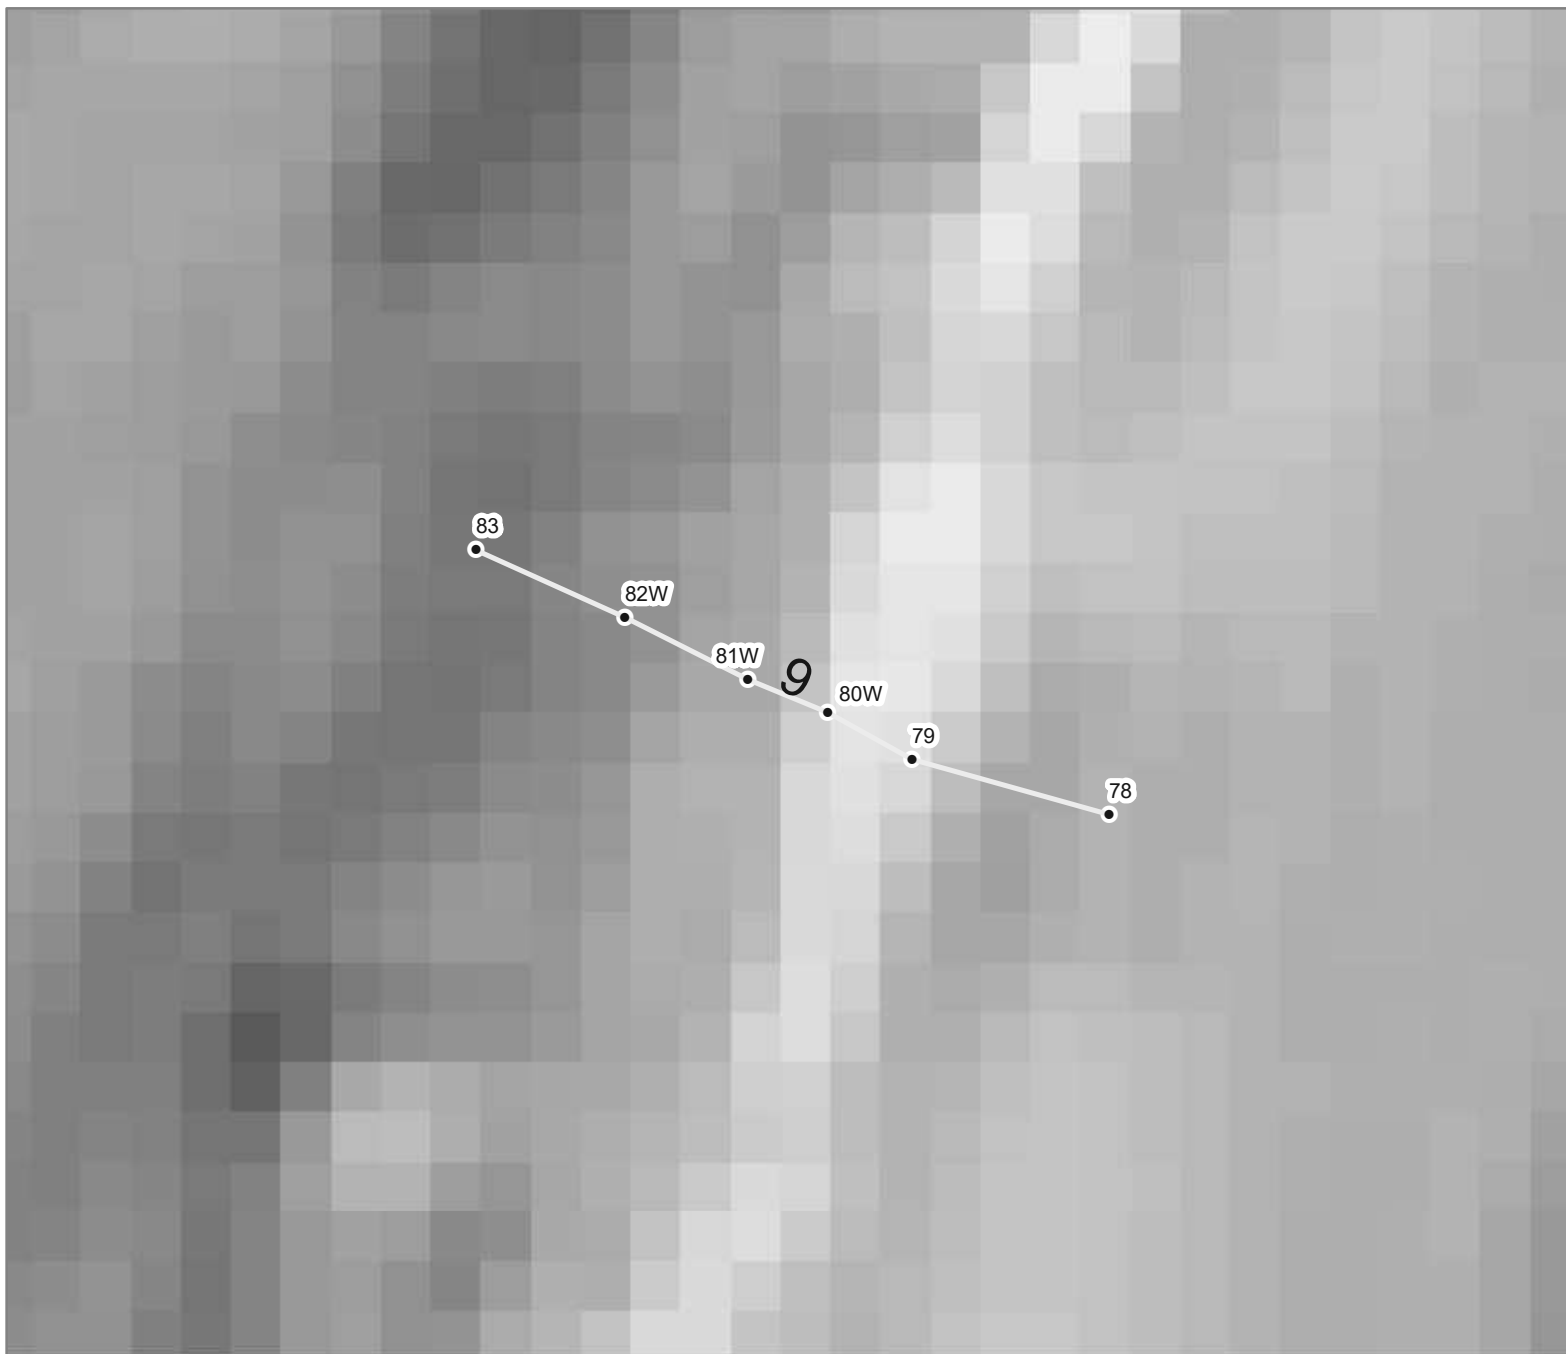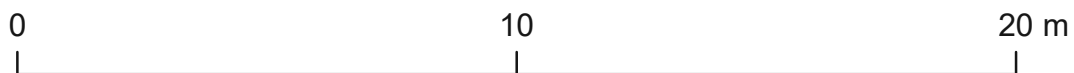

*Proile: 9*

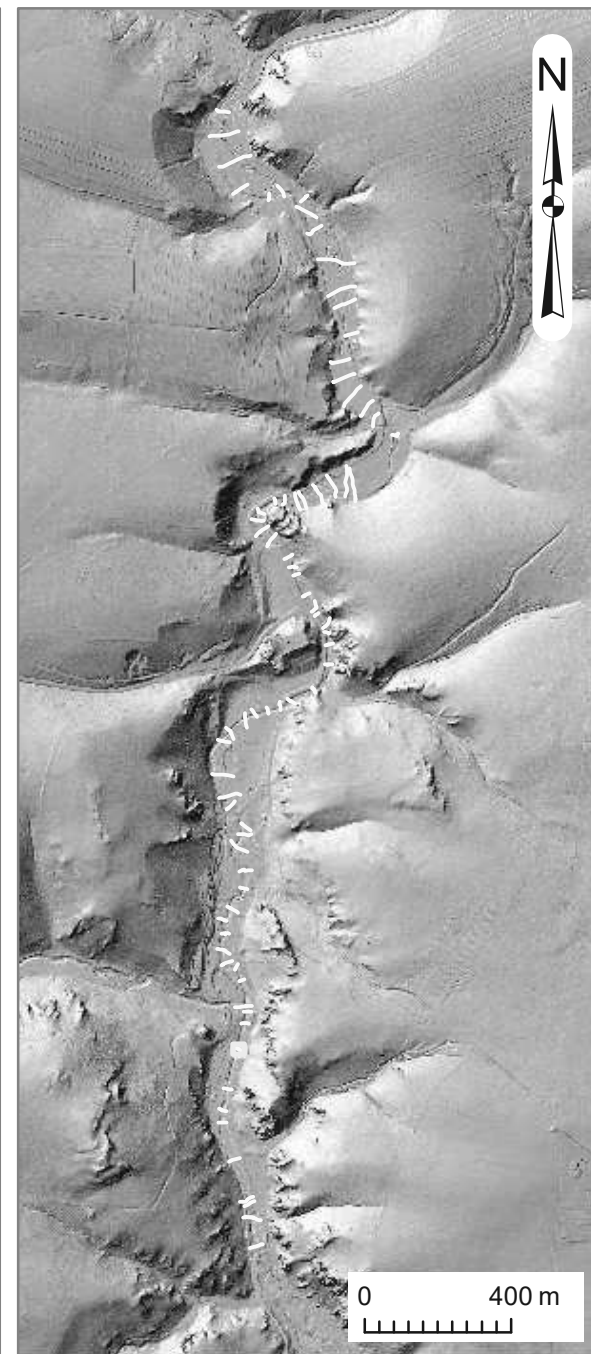

*Analyses of the Prądnik riverbed shape based on archiva and contemporary data sets – old maps, LIDAR, DTMs and cross-sectional profile*

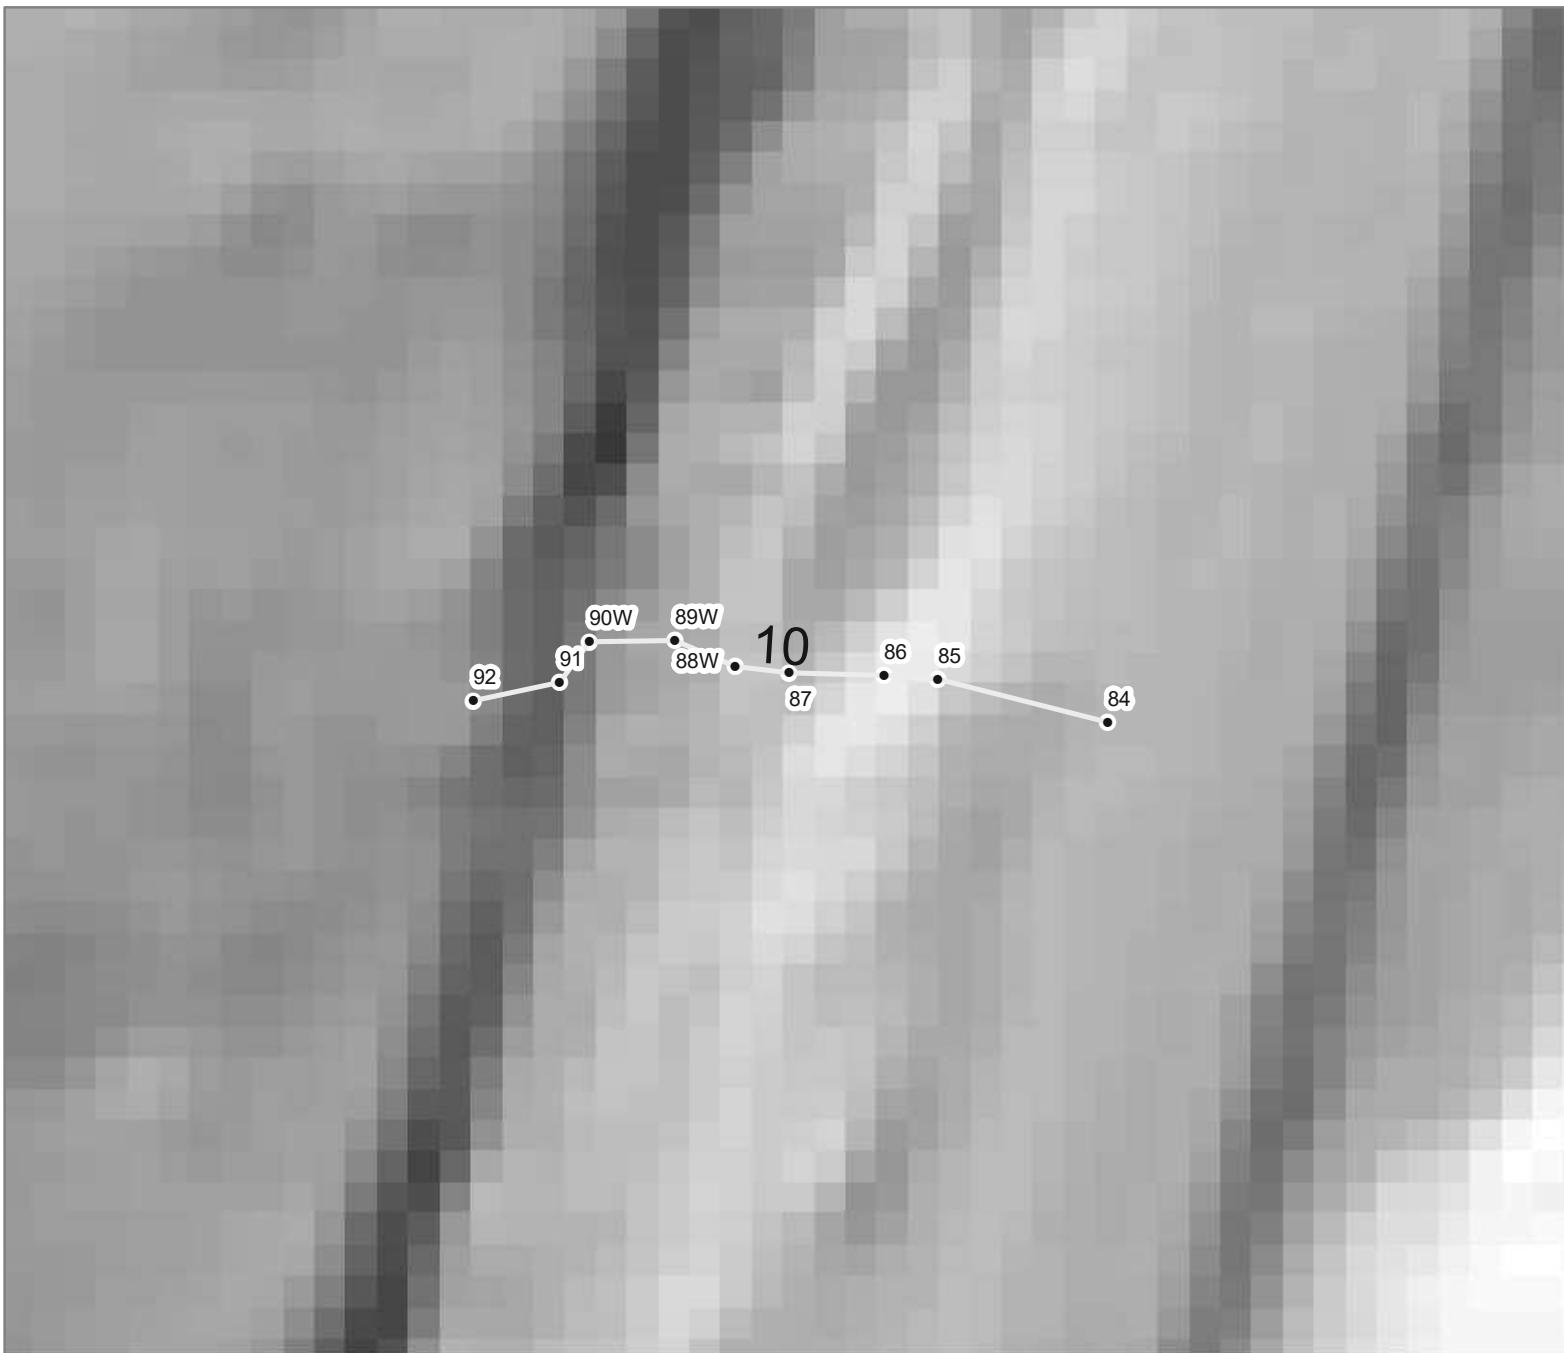

0 10 20 m

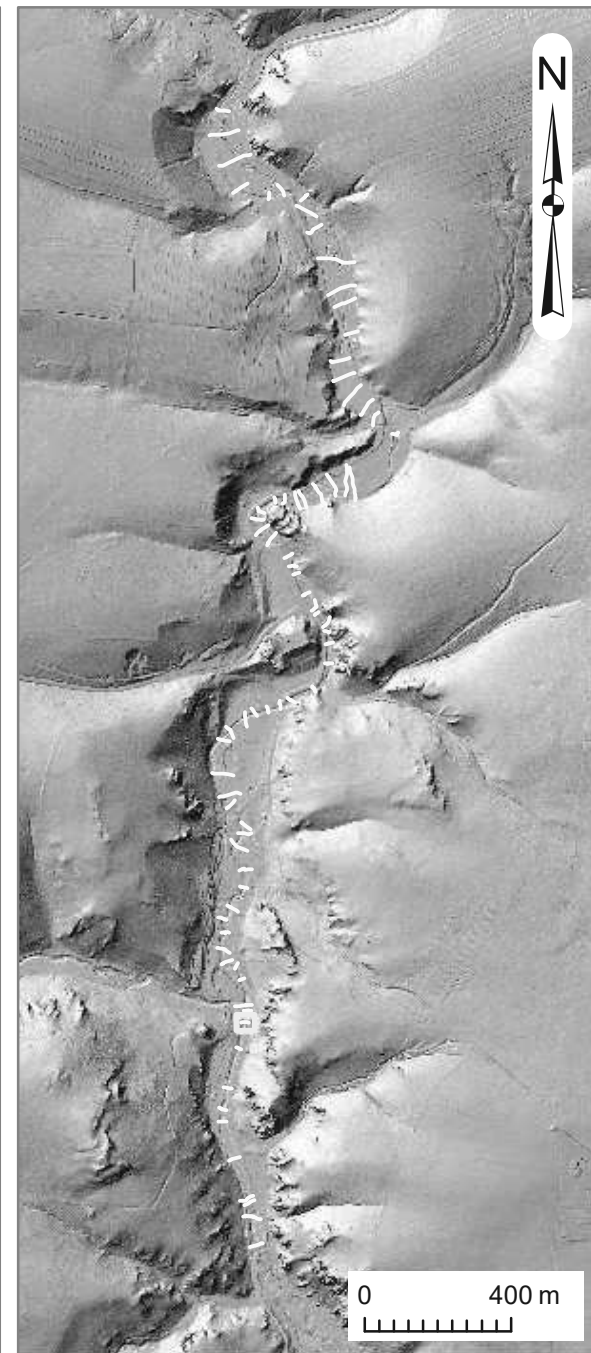

**Proile: 10** Analyses of the Prądnik riverbed shape based on archiva and contemporary data sets – old maps, LIDAR, DTMs and cross-sectional profile

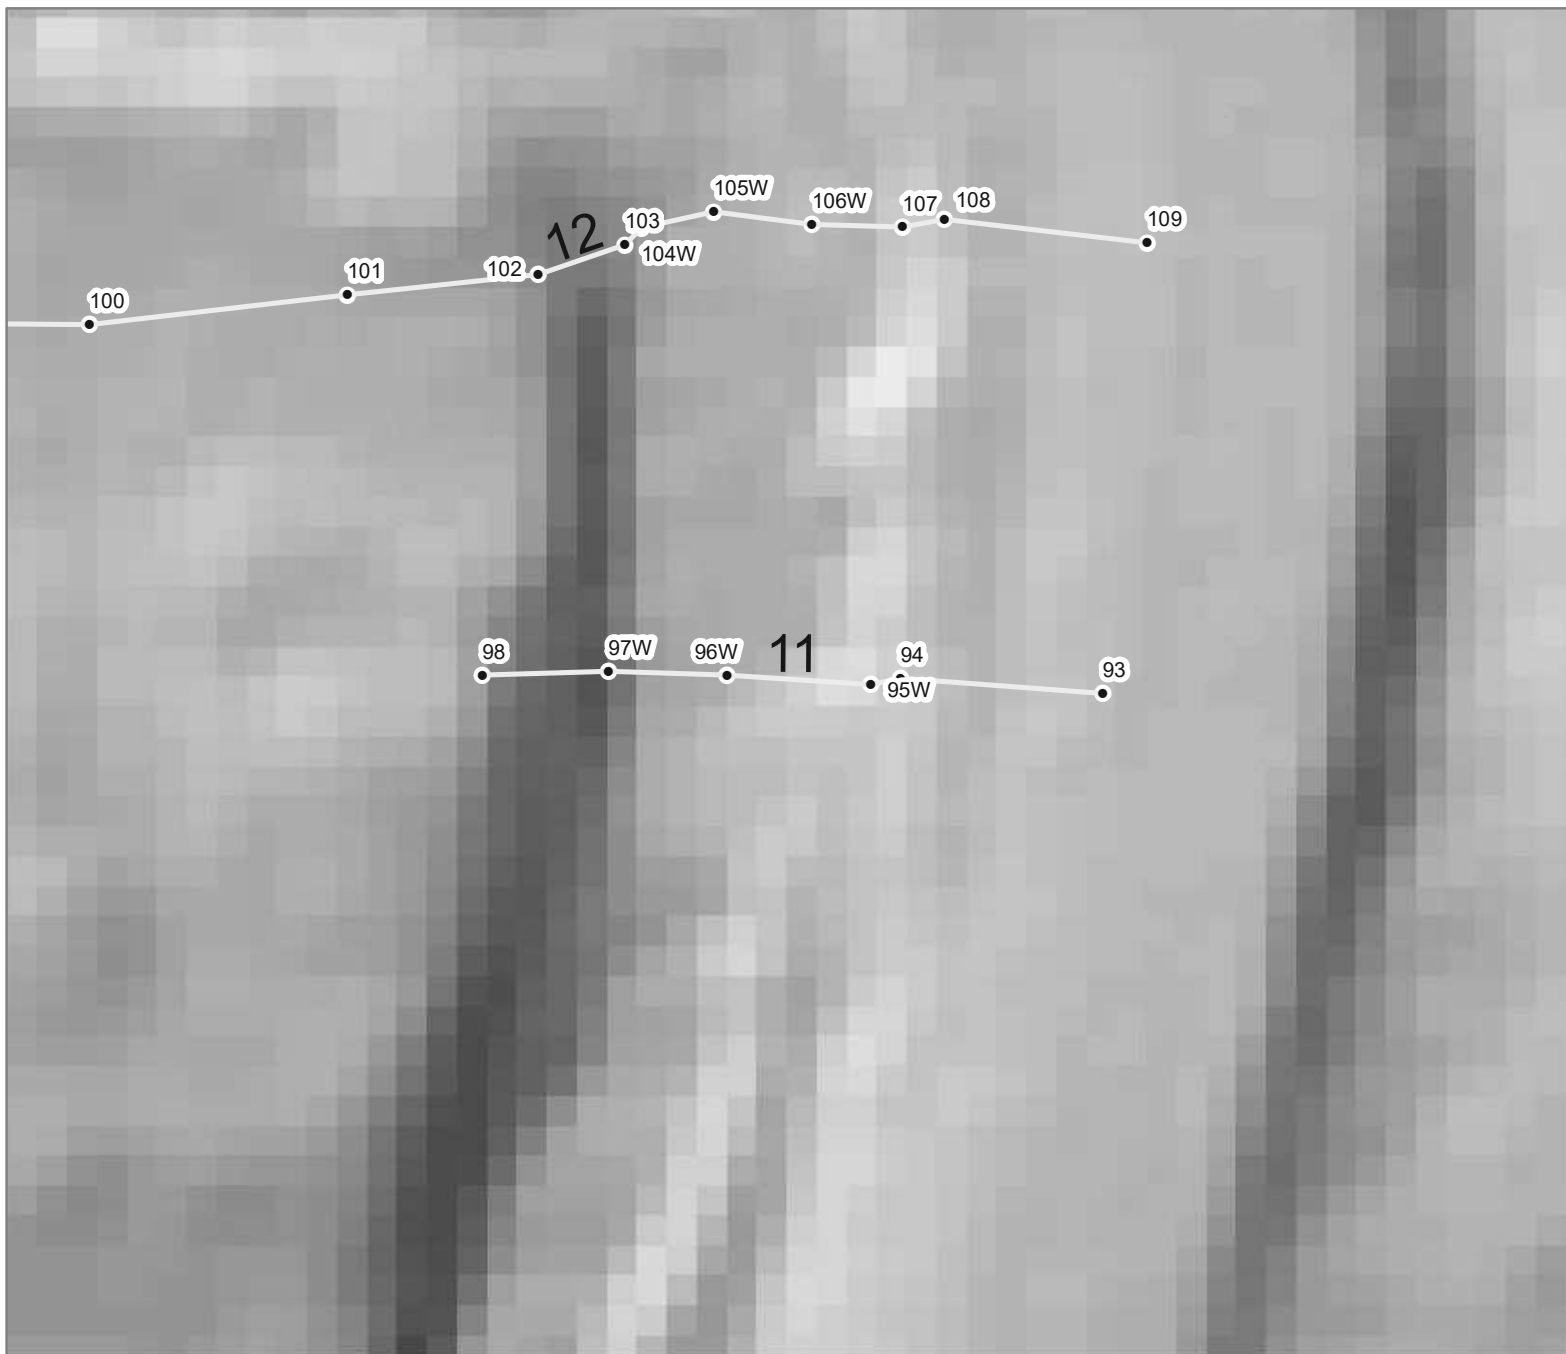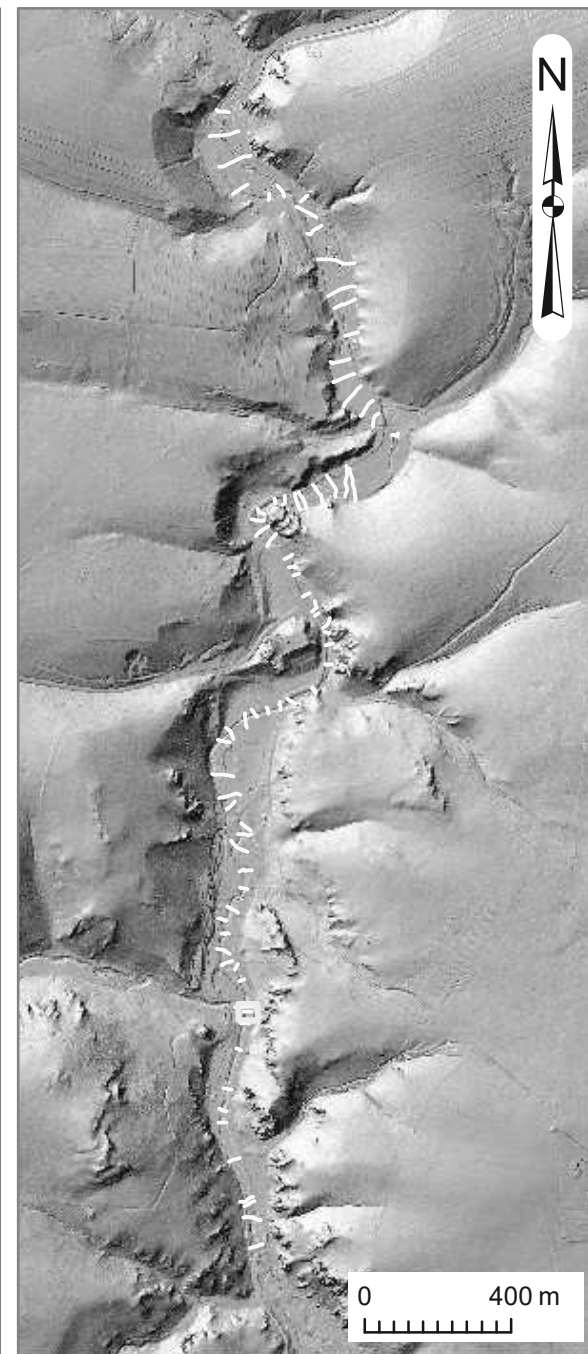

**Proile: 11** Analyses of the Prądnik riverbed shape based on archiva and contemporary data sets – old maps, LIDAR, DTMs and cross-sectional profile

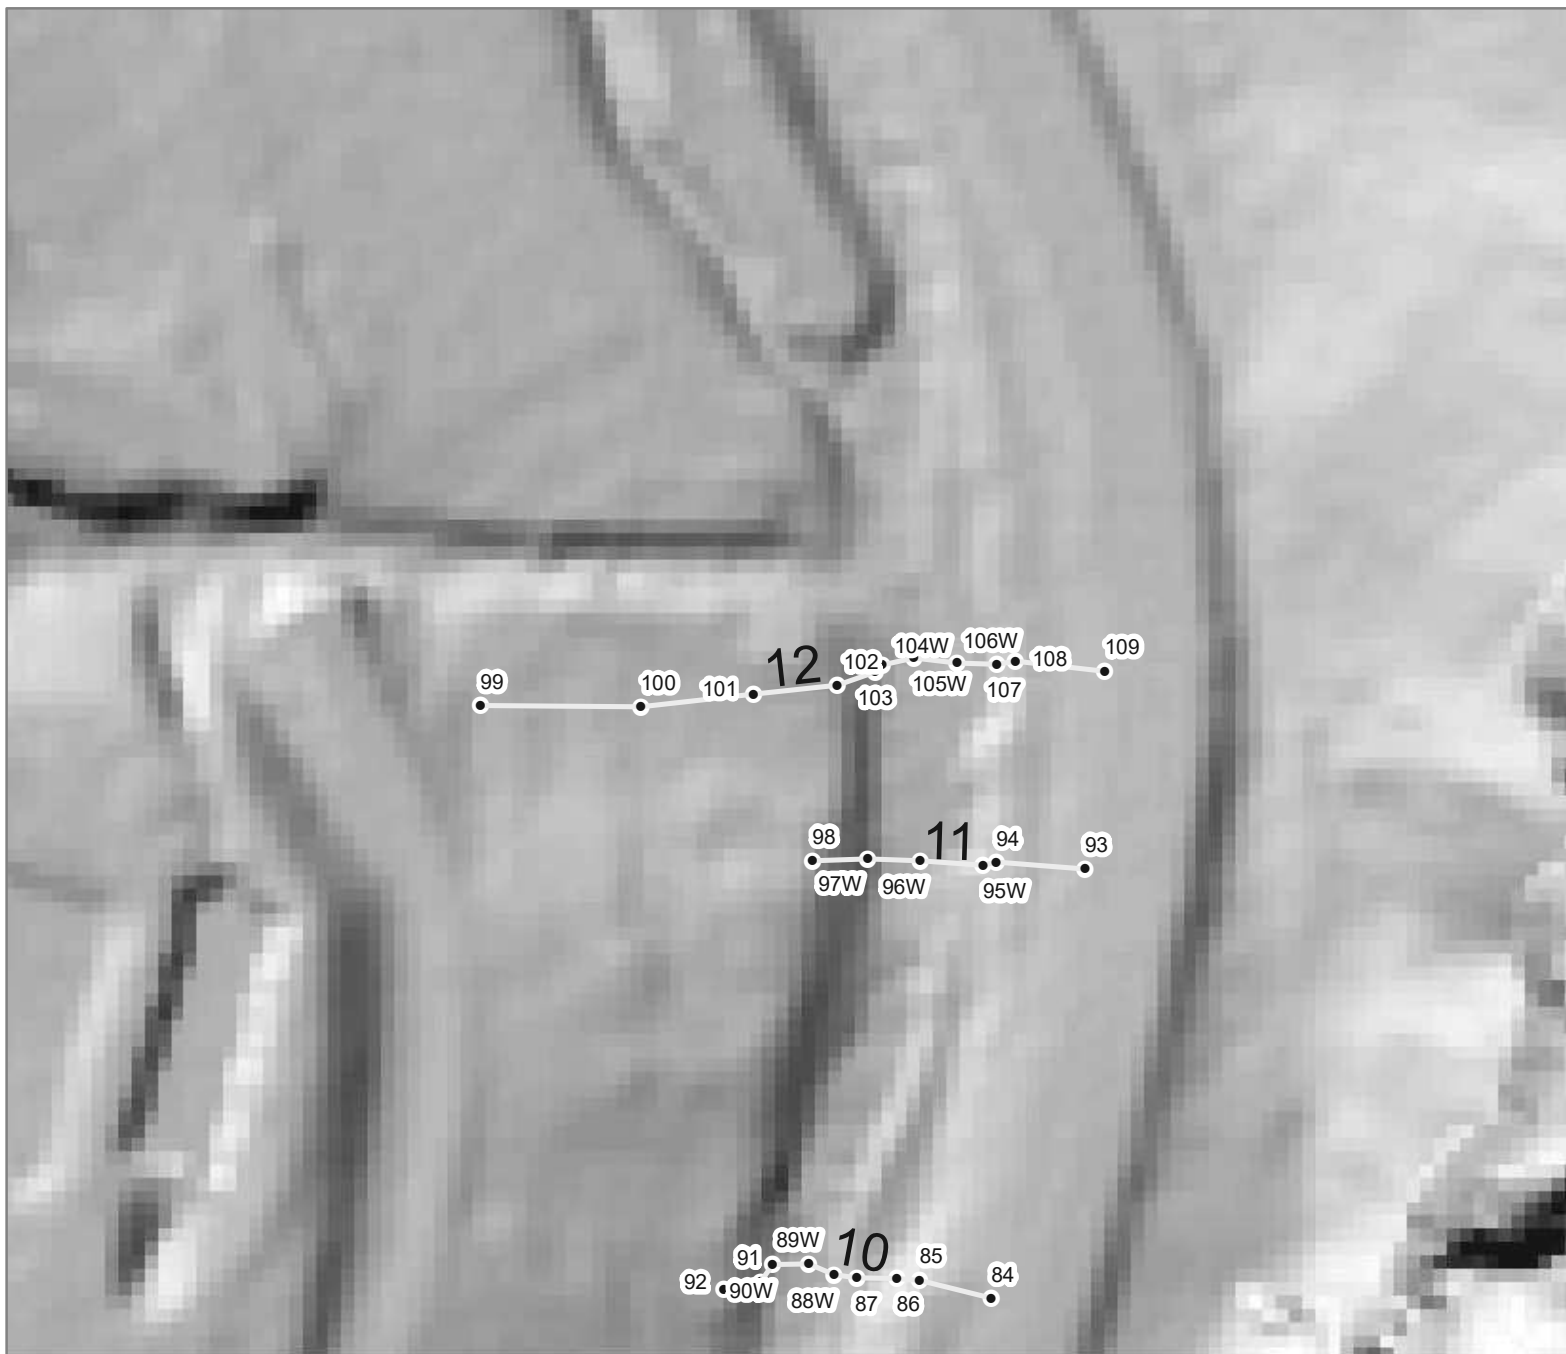

0 10 20 m

## Proile: 12

Analyses of the Prądnik riverbed shape based on archiva and contemporary data sets – old maps, LIDAR, DTMs and cross-sectional profile

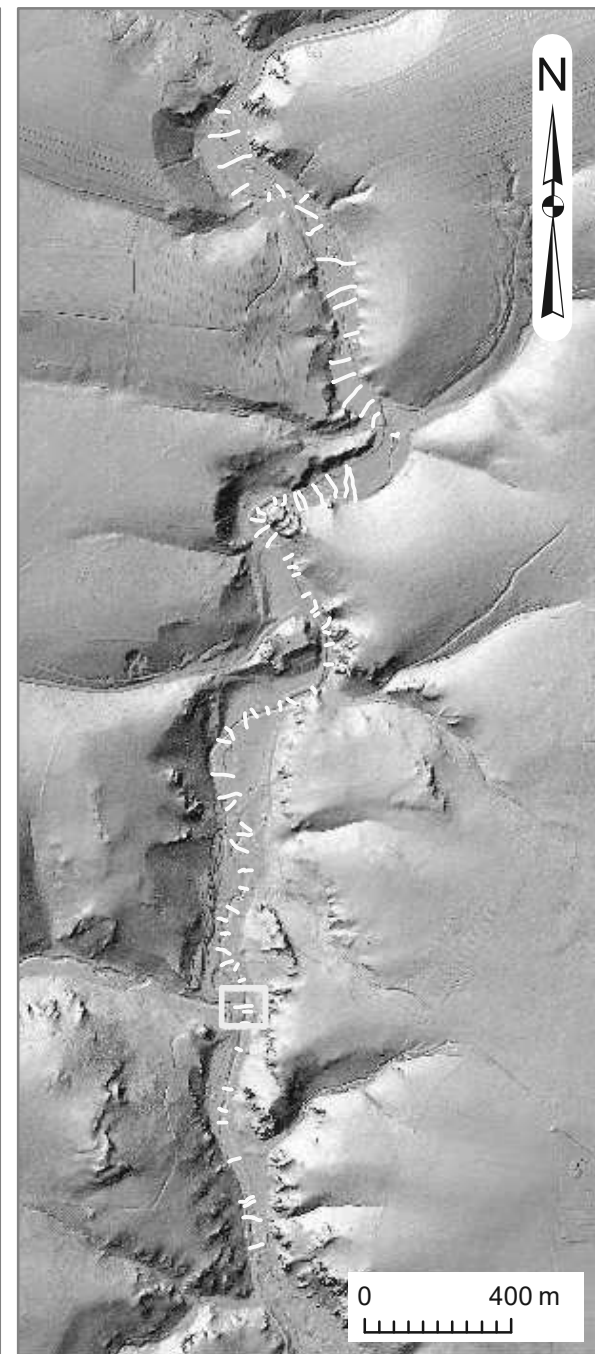

0 400 m

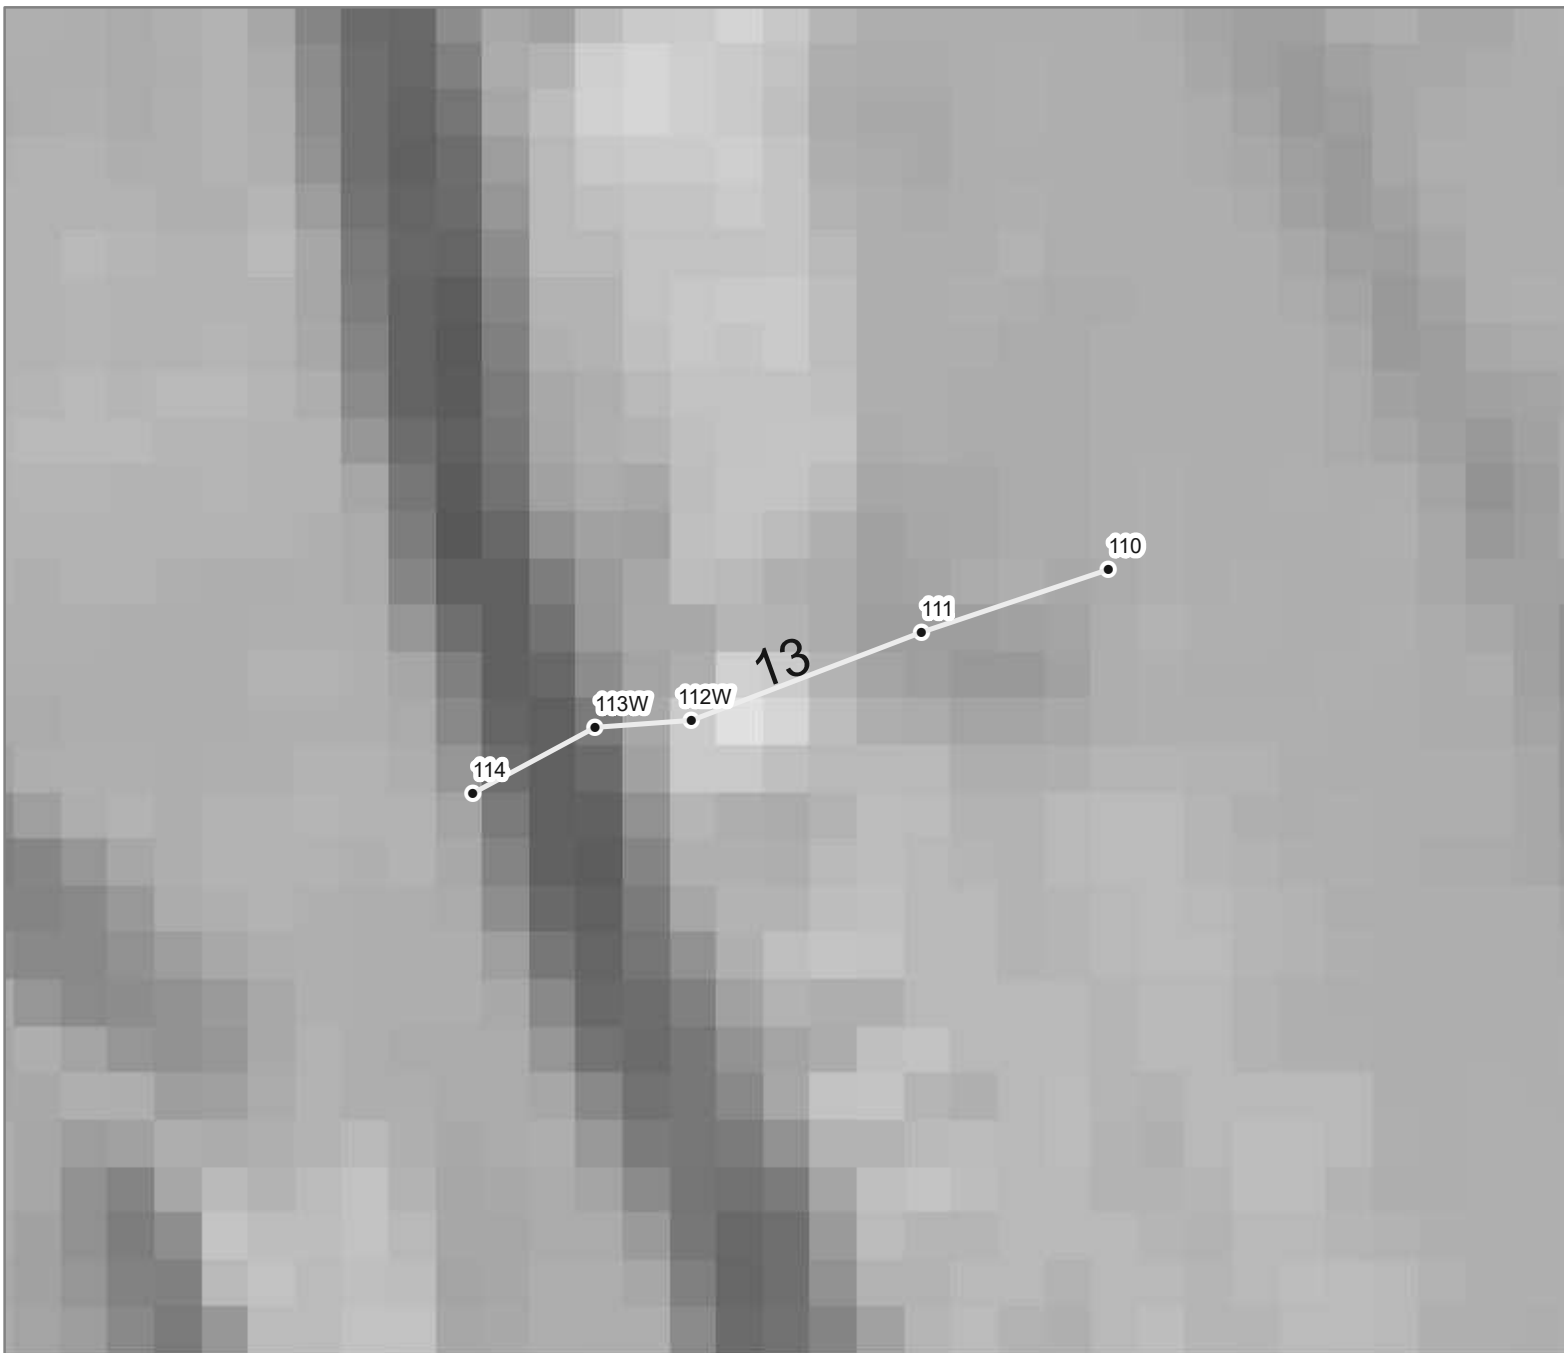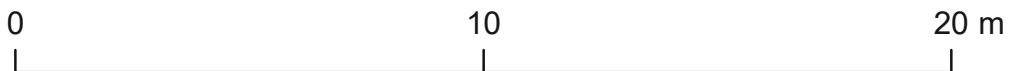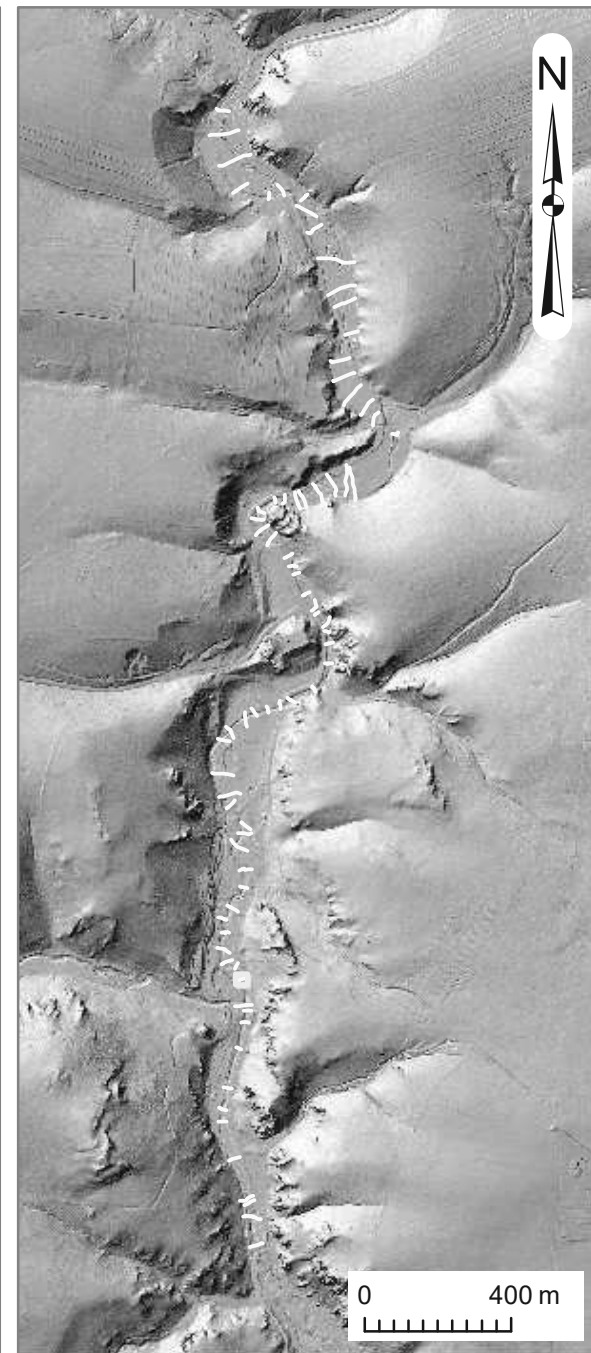

**Proile: 13** Analyses of the Prądnik riverbed shape based on archiva and contemporary data sets – old maps, LIDAR, DTMs and cross-sectional profile

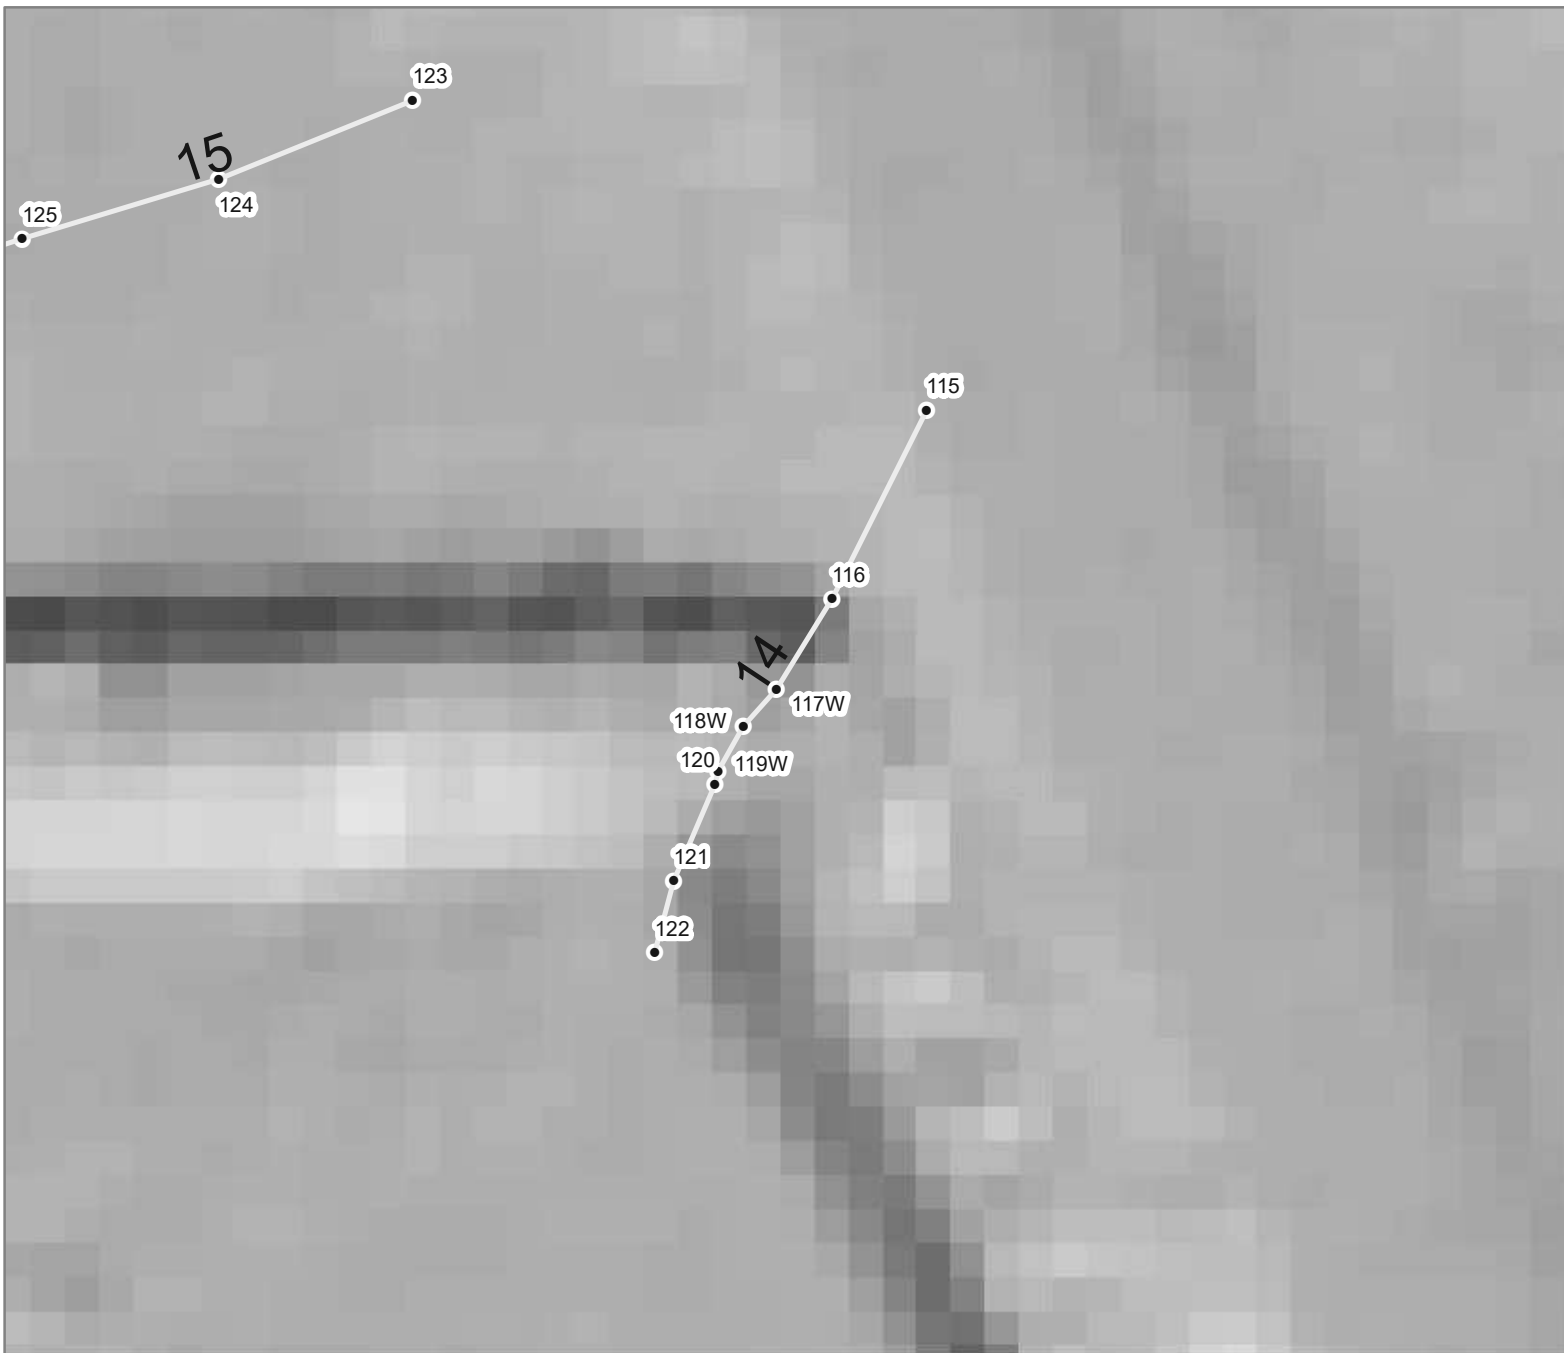

0 10 20 m

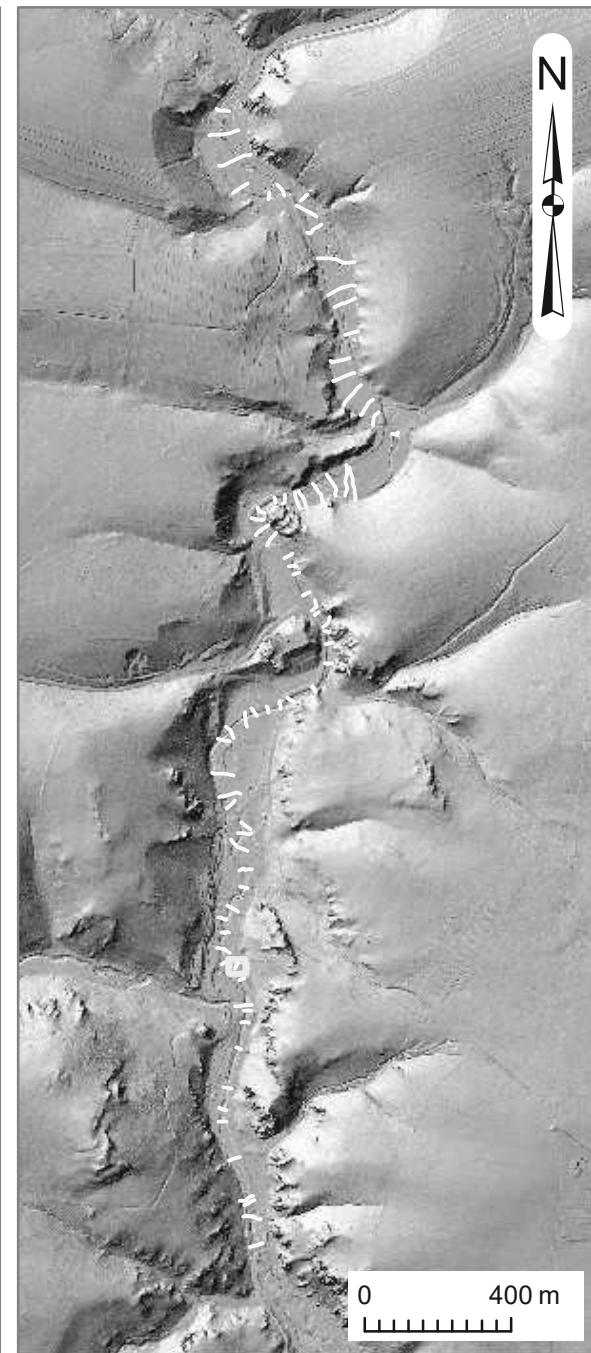

*Proile: 14* Analyses of the Prądnik riverbed shape based on archiva and contemporary data sets – old maps, LIDAR, DTMs and cross-sectional profile



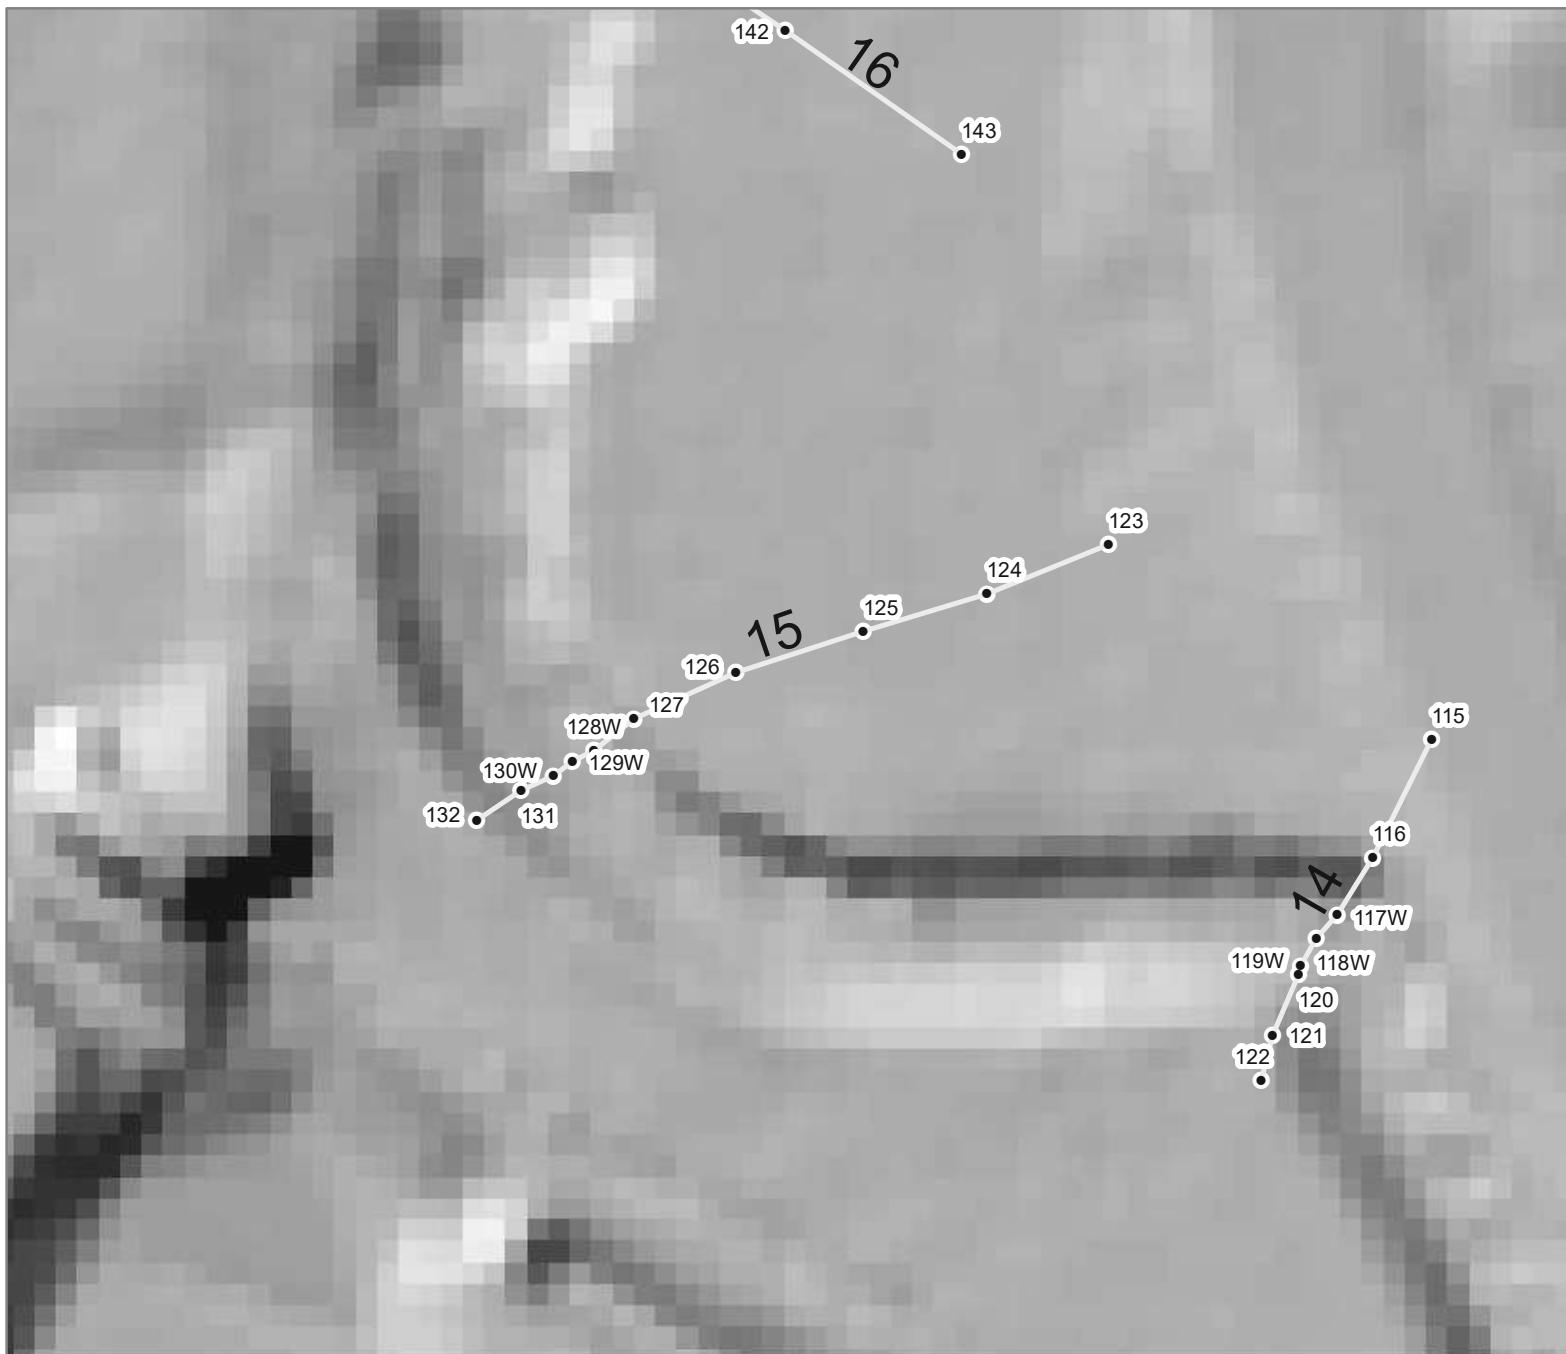

0 10 20 m

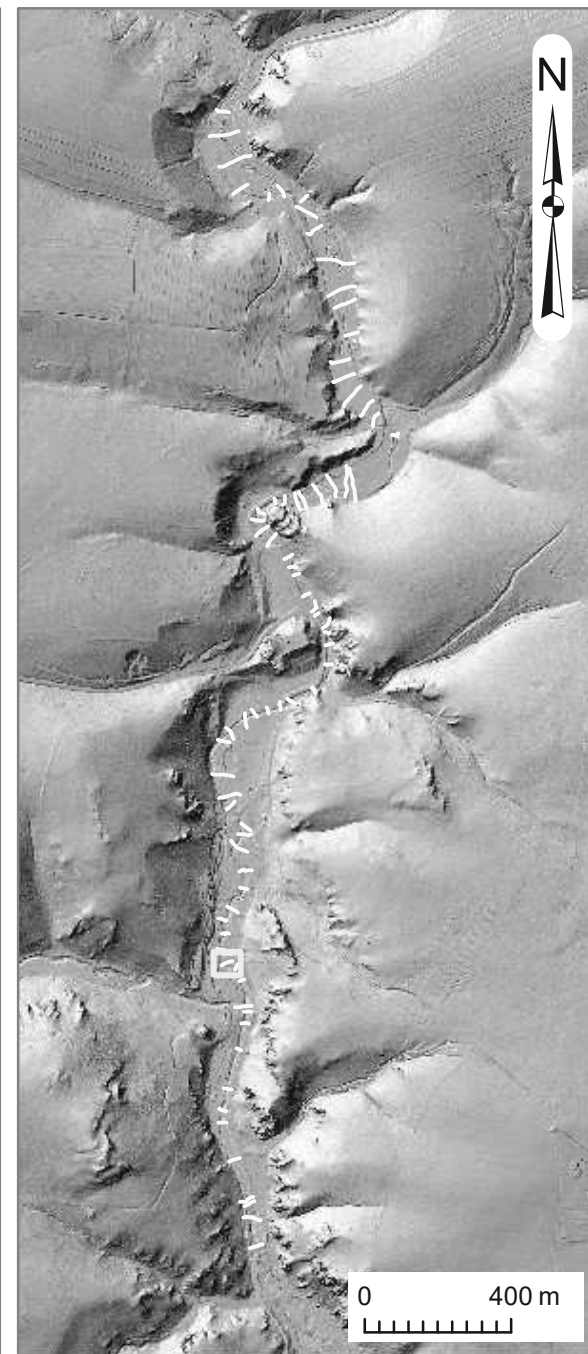

0 400 m

*Proile: 15* Analyses of the Prądnik riverbed shape based on archiva and contemporary data sets – old maps, LIDAR, DTMs and cross-sectional profile

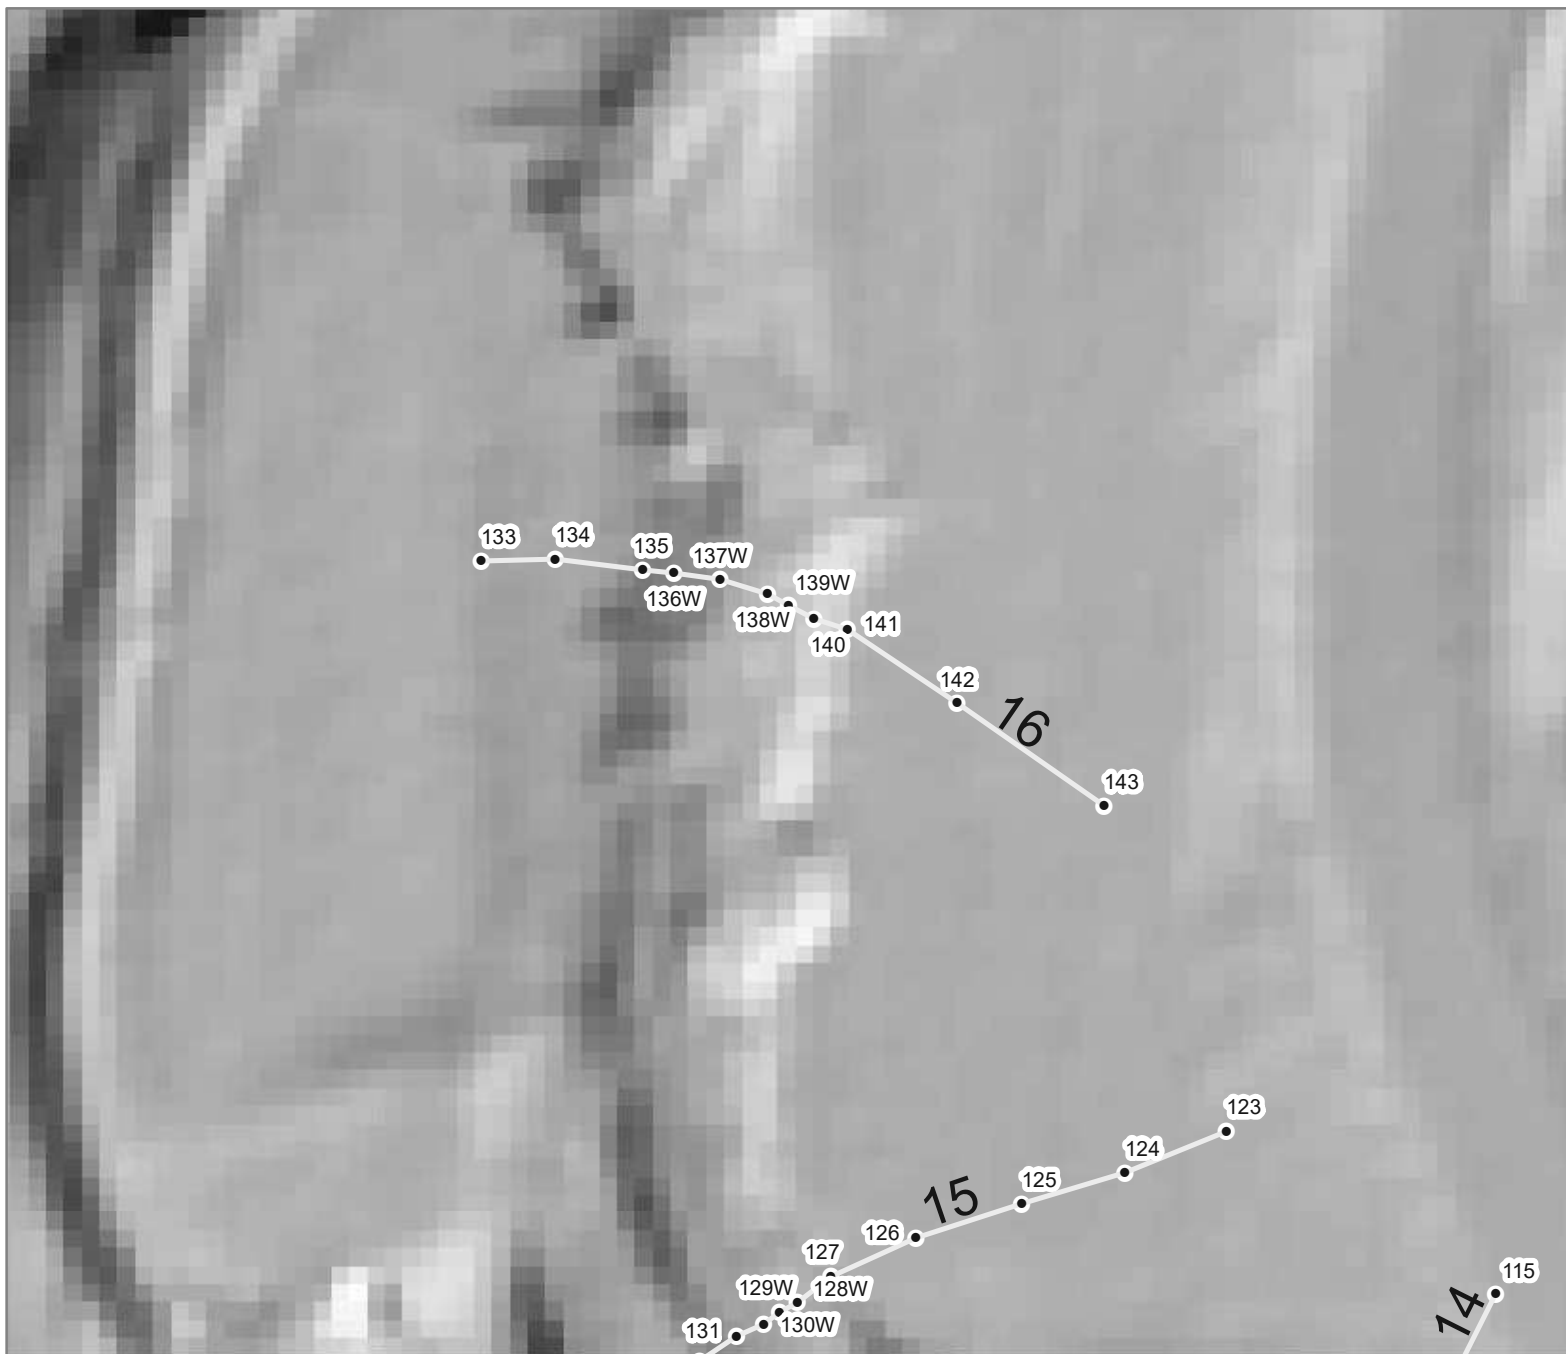

0 10 20 m

**Proile: 16** Analyses of the Prądnik riverbed shape based on archiva and contemporary data sets – old maps, LIDAR, DTMs and cross-sectional profile

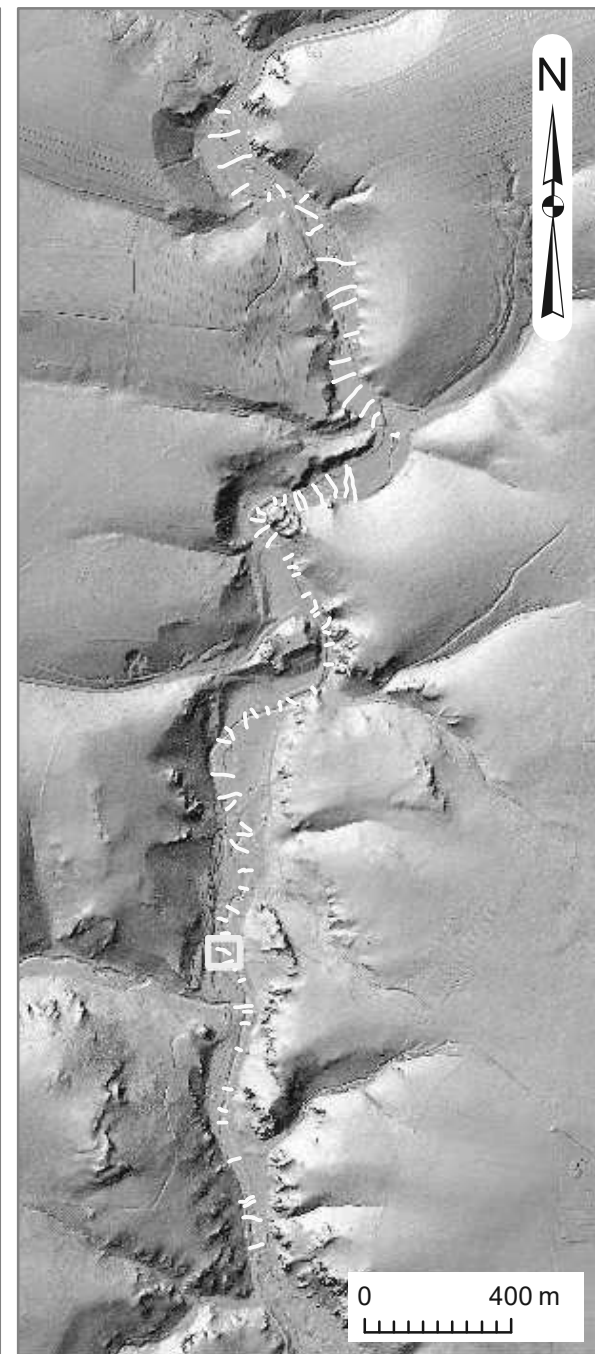

0 400 m

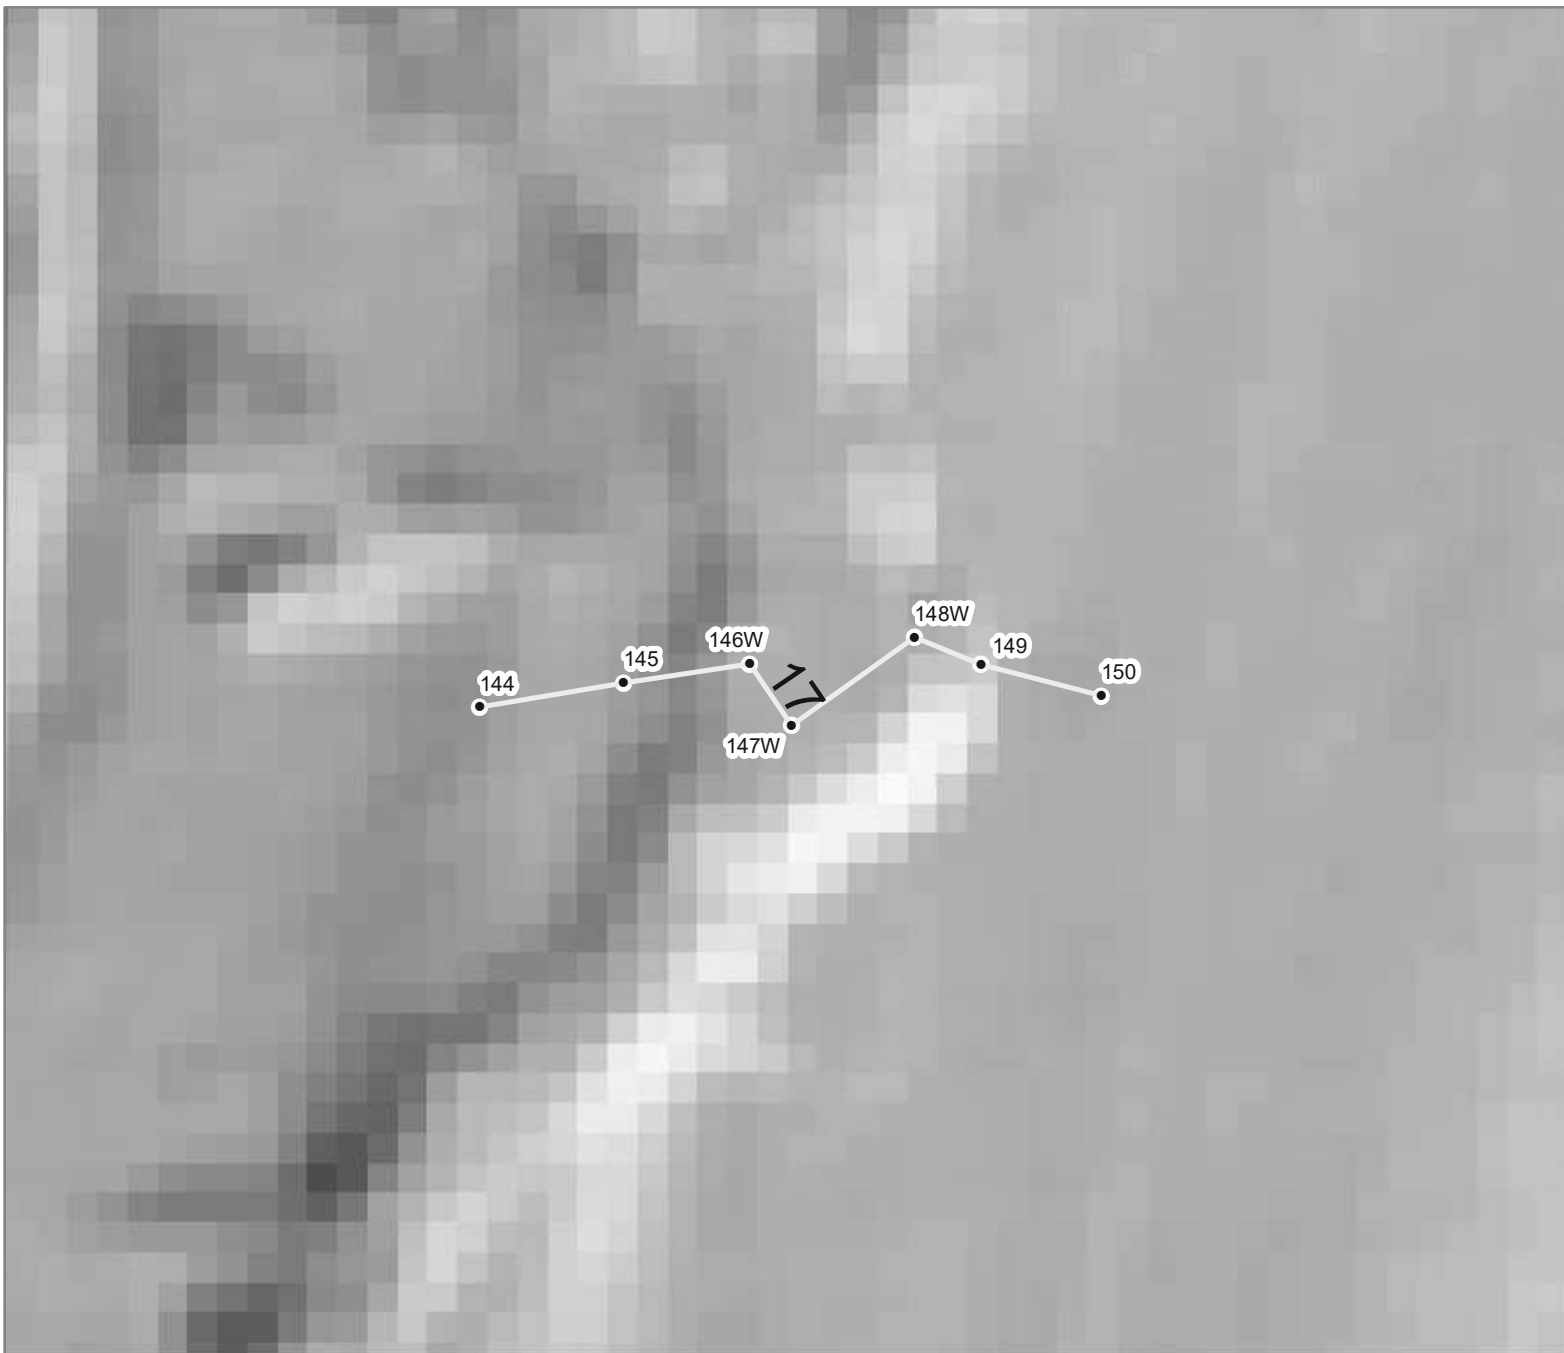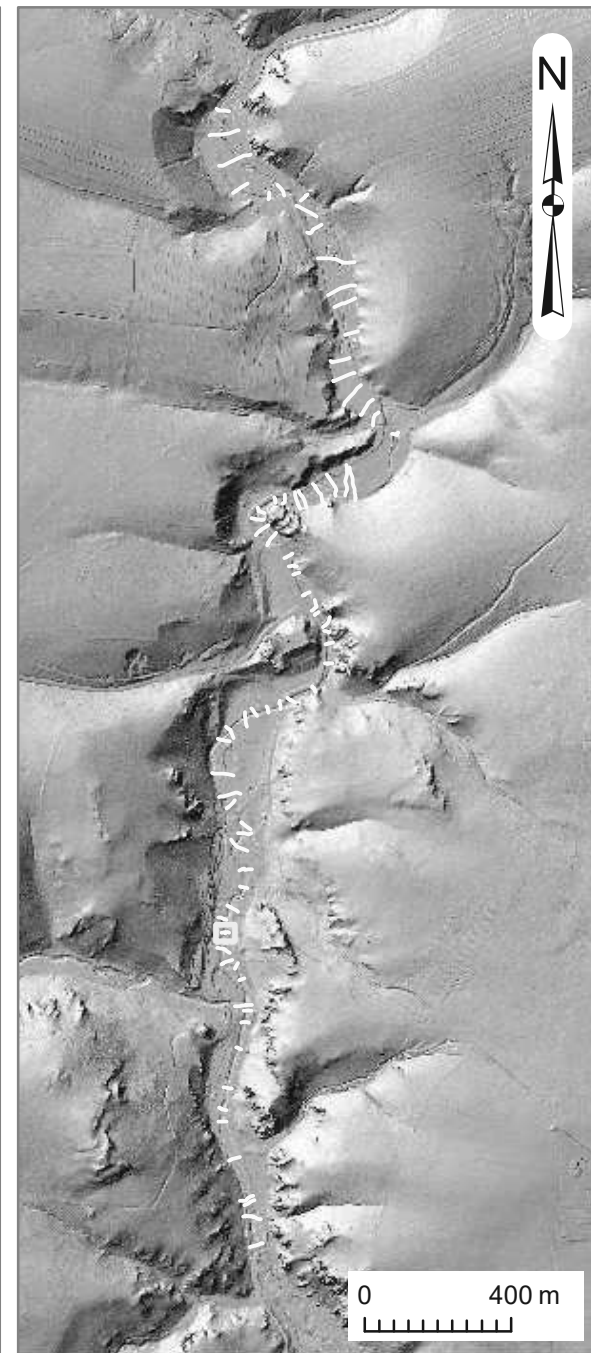

**Proile: 17** Analyses of the Prądnik riverbed shape based on archiva and contemporary data sets – old maps, LIDAR, DTMs and cross-sectional profile

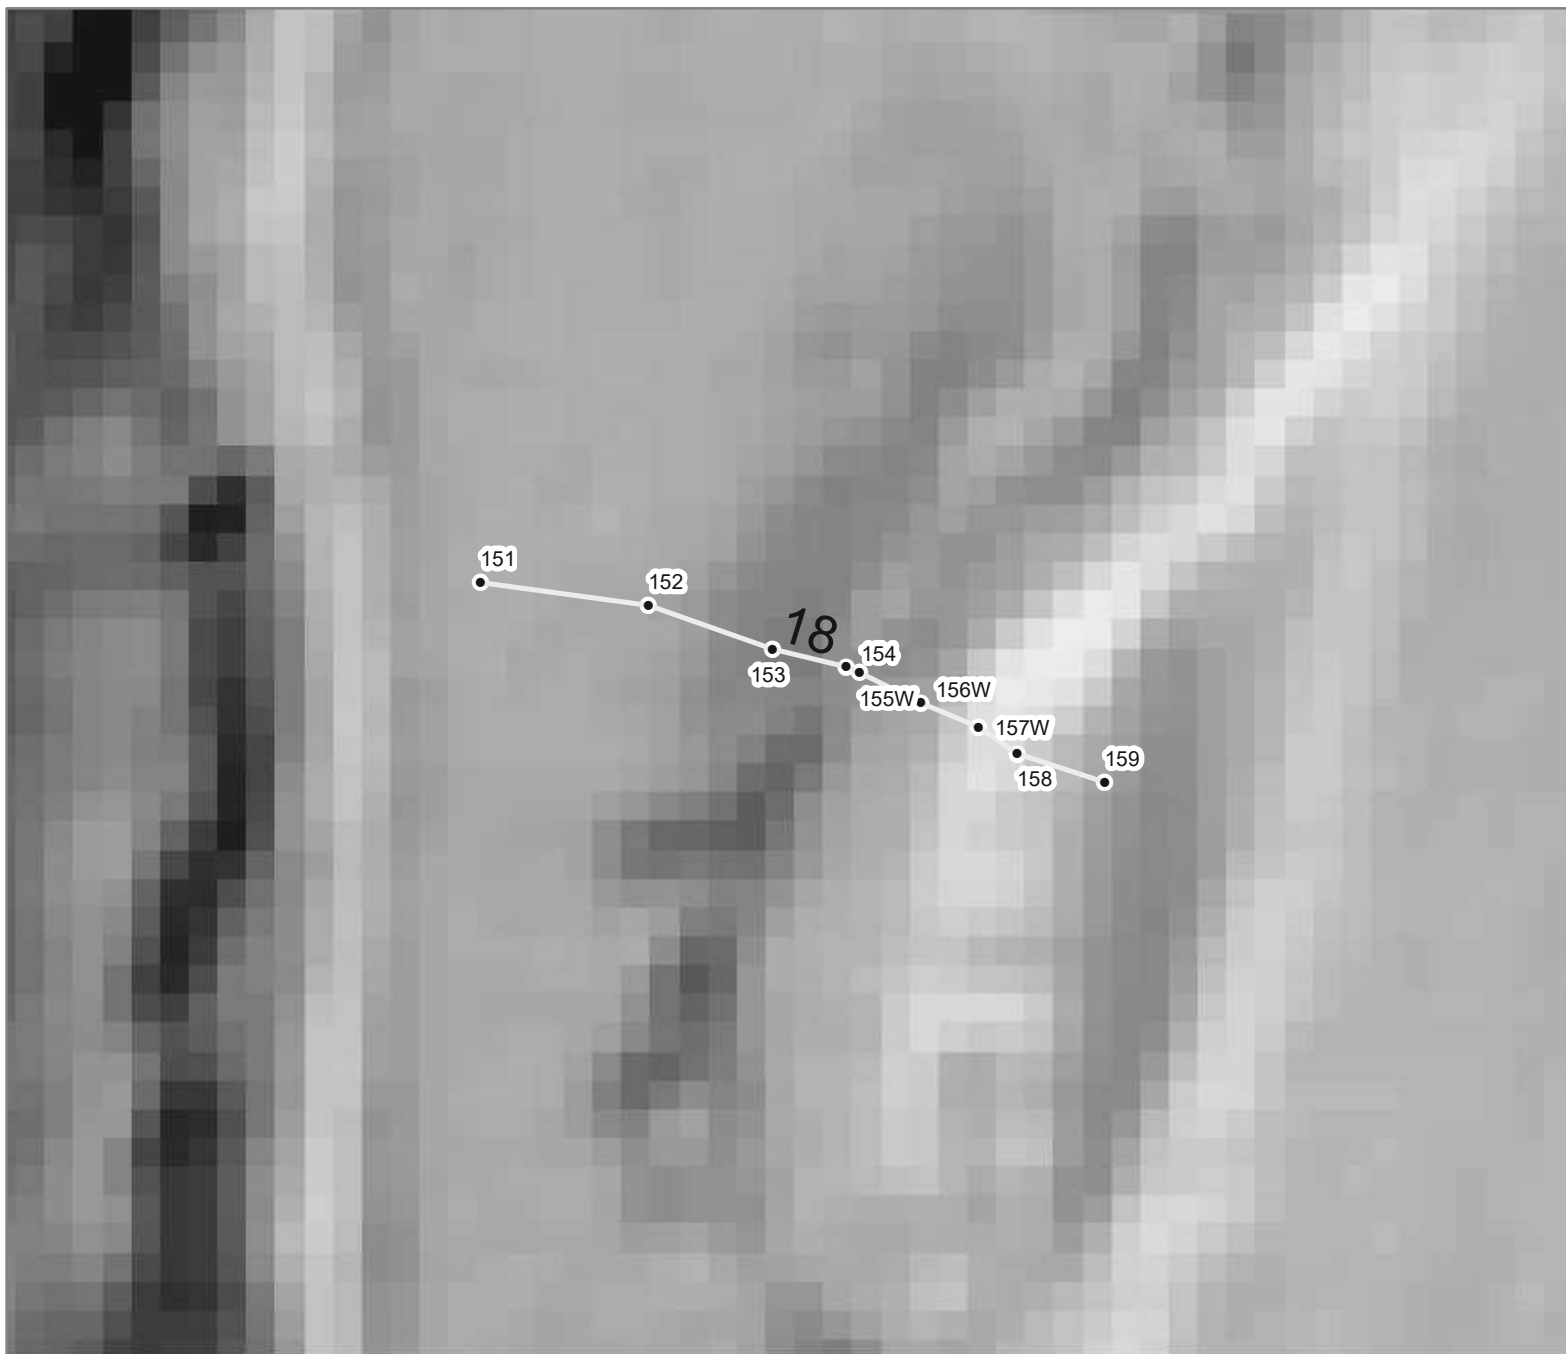

0 10 20 m

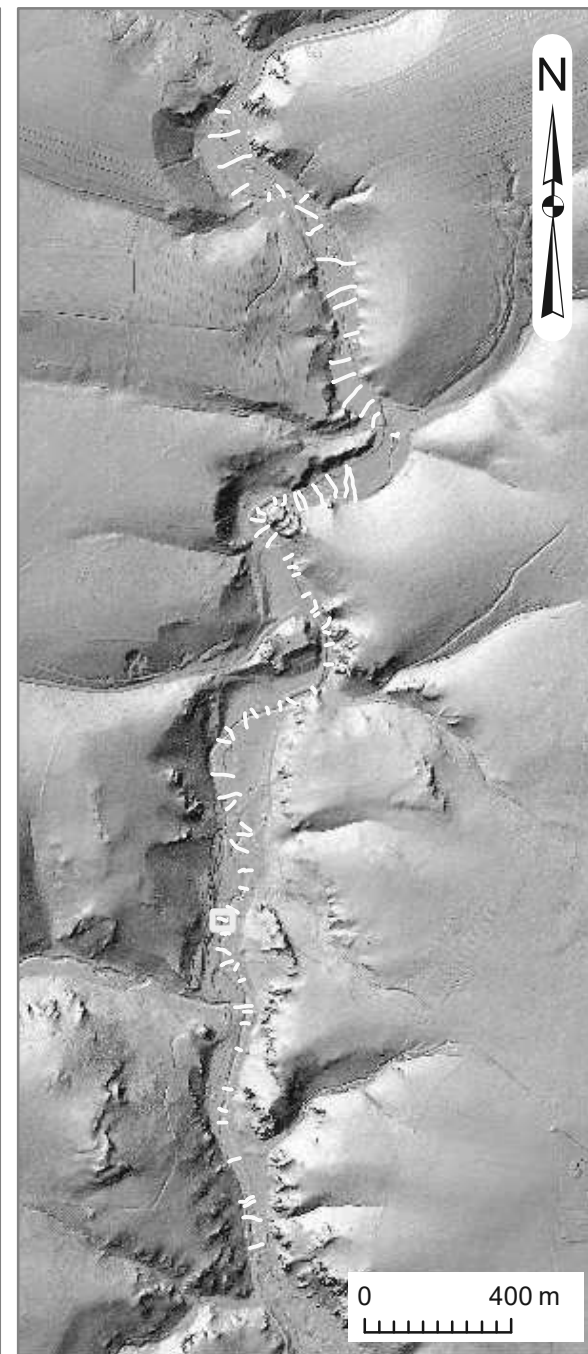

*Proile: 18* Analyses of the Prądnik riverbed shape based on archiva and contemporary data sets – old maps, LIDAR, DTMs and cross-sectional profile

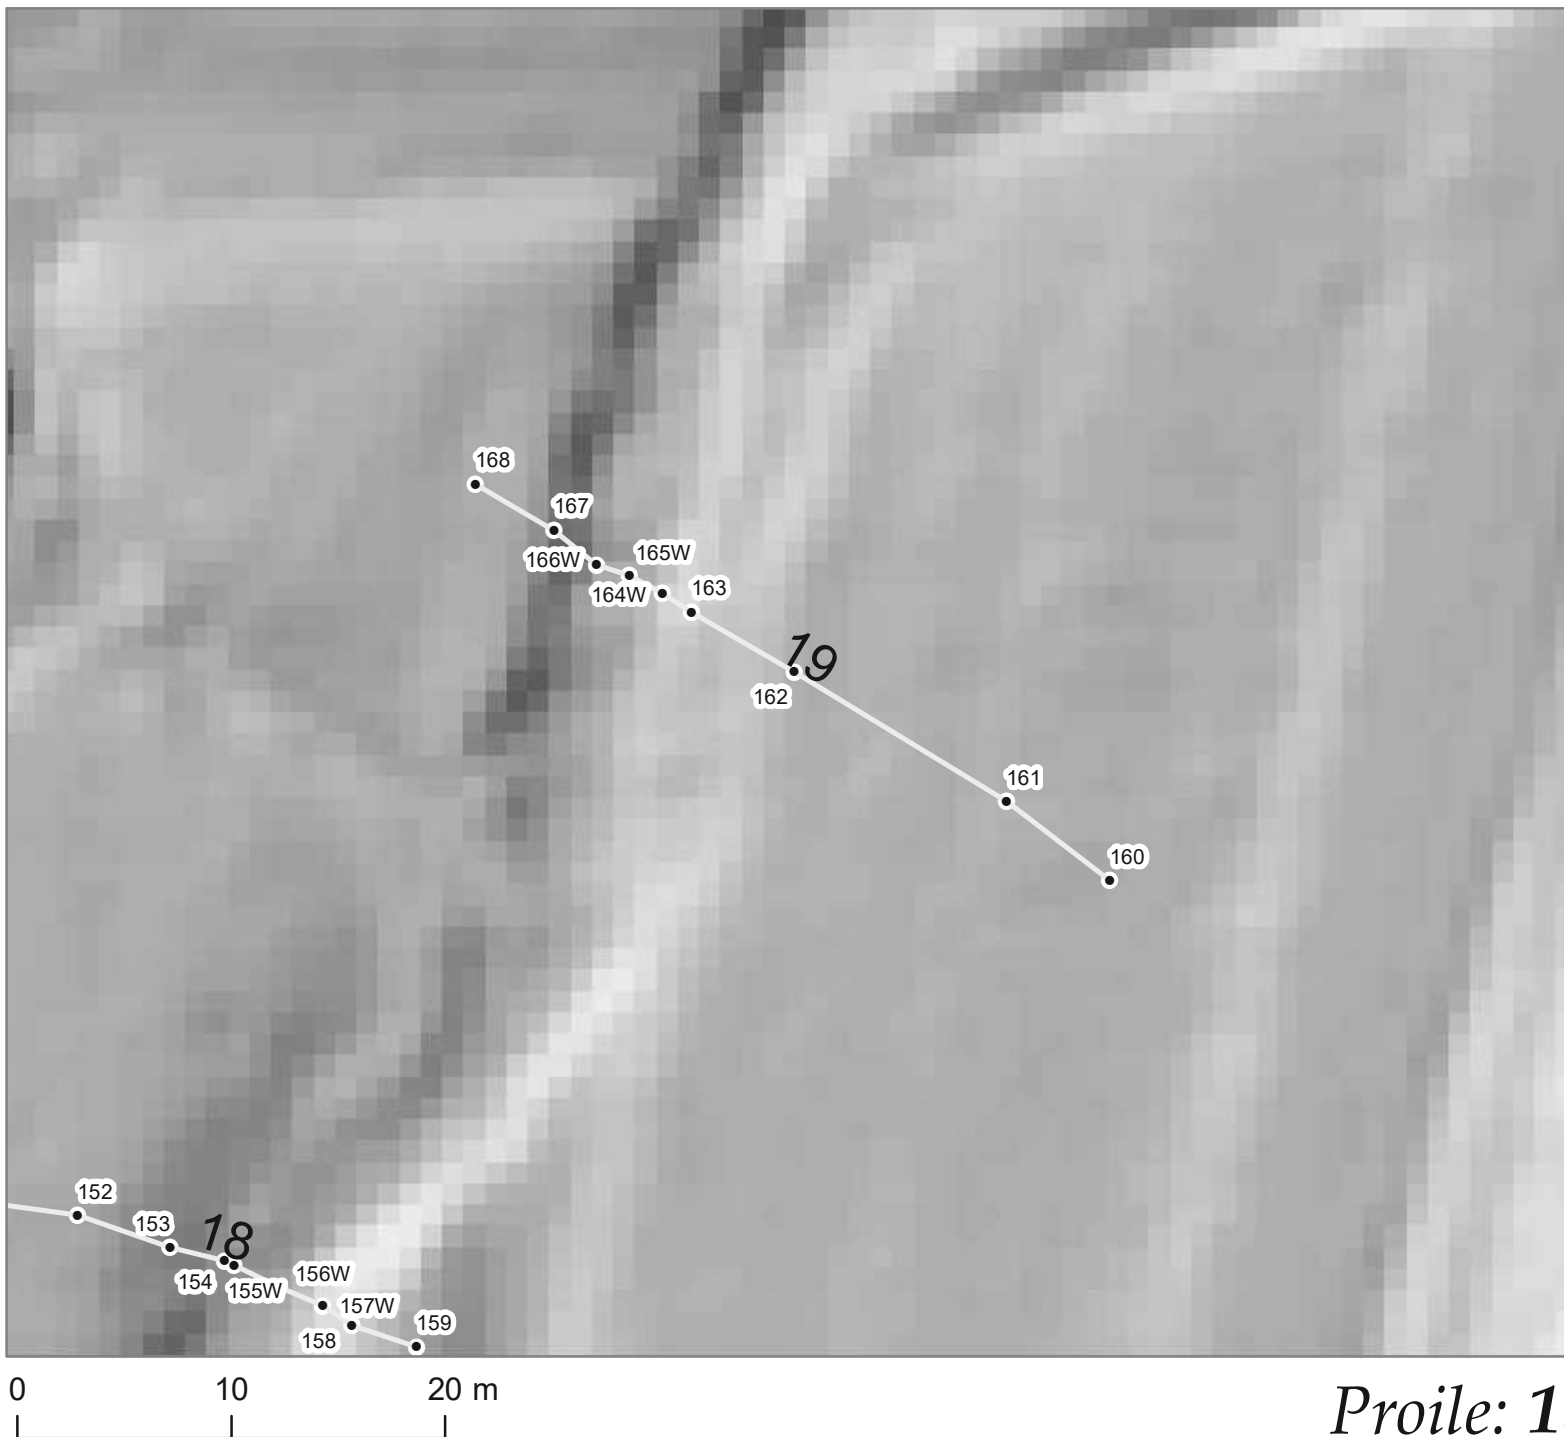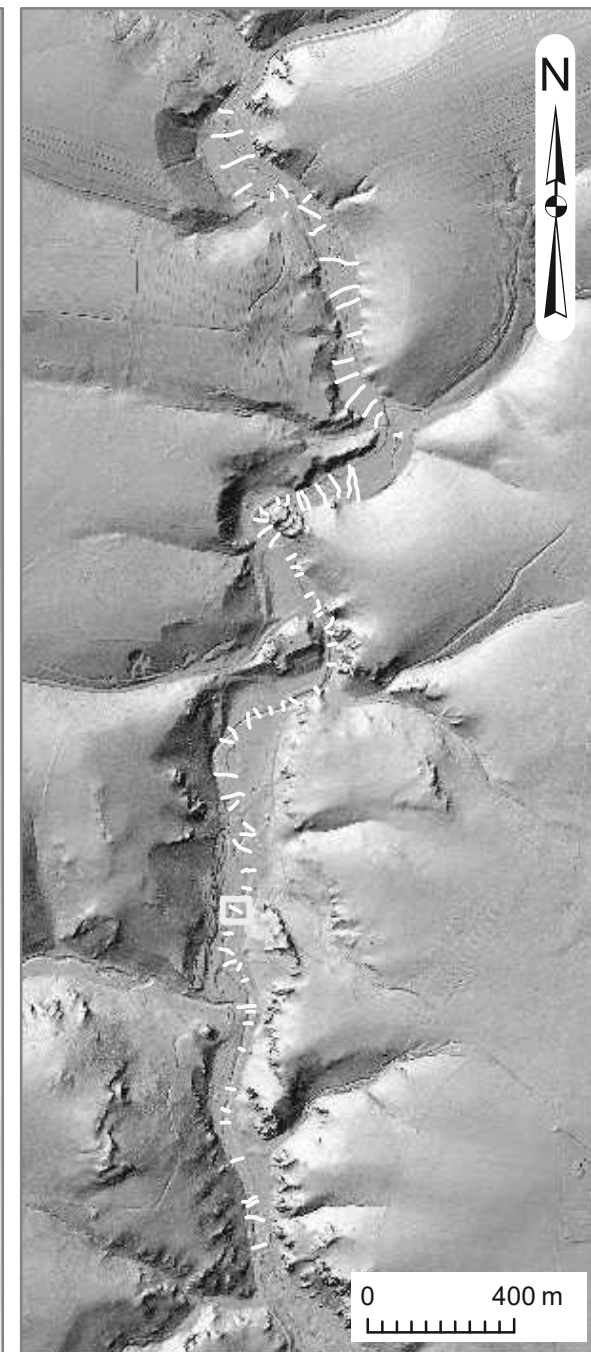

**Proile: 19** Analyses of the Prądnik riverbed shape based on archiva and contemporary data sets – old maps, LIDAR, DTMs and cross-sectional profile

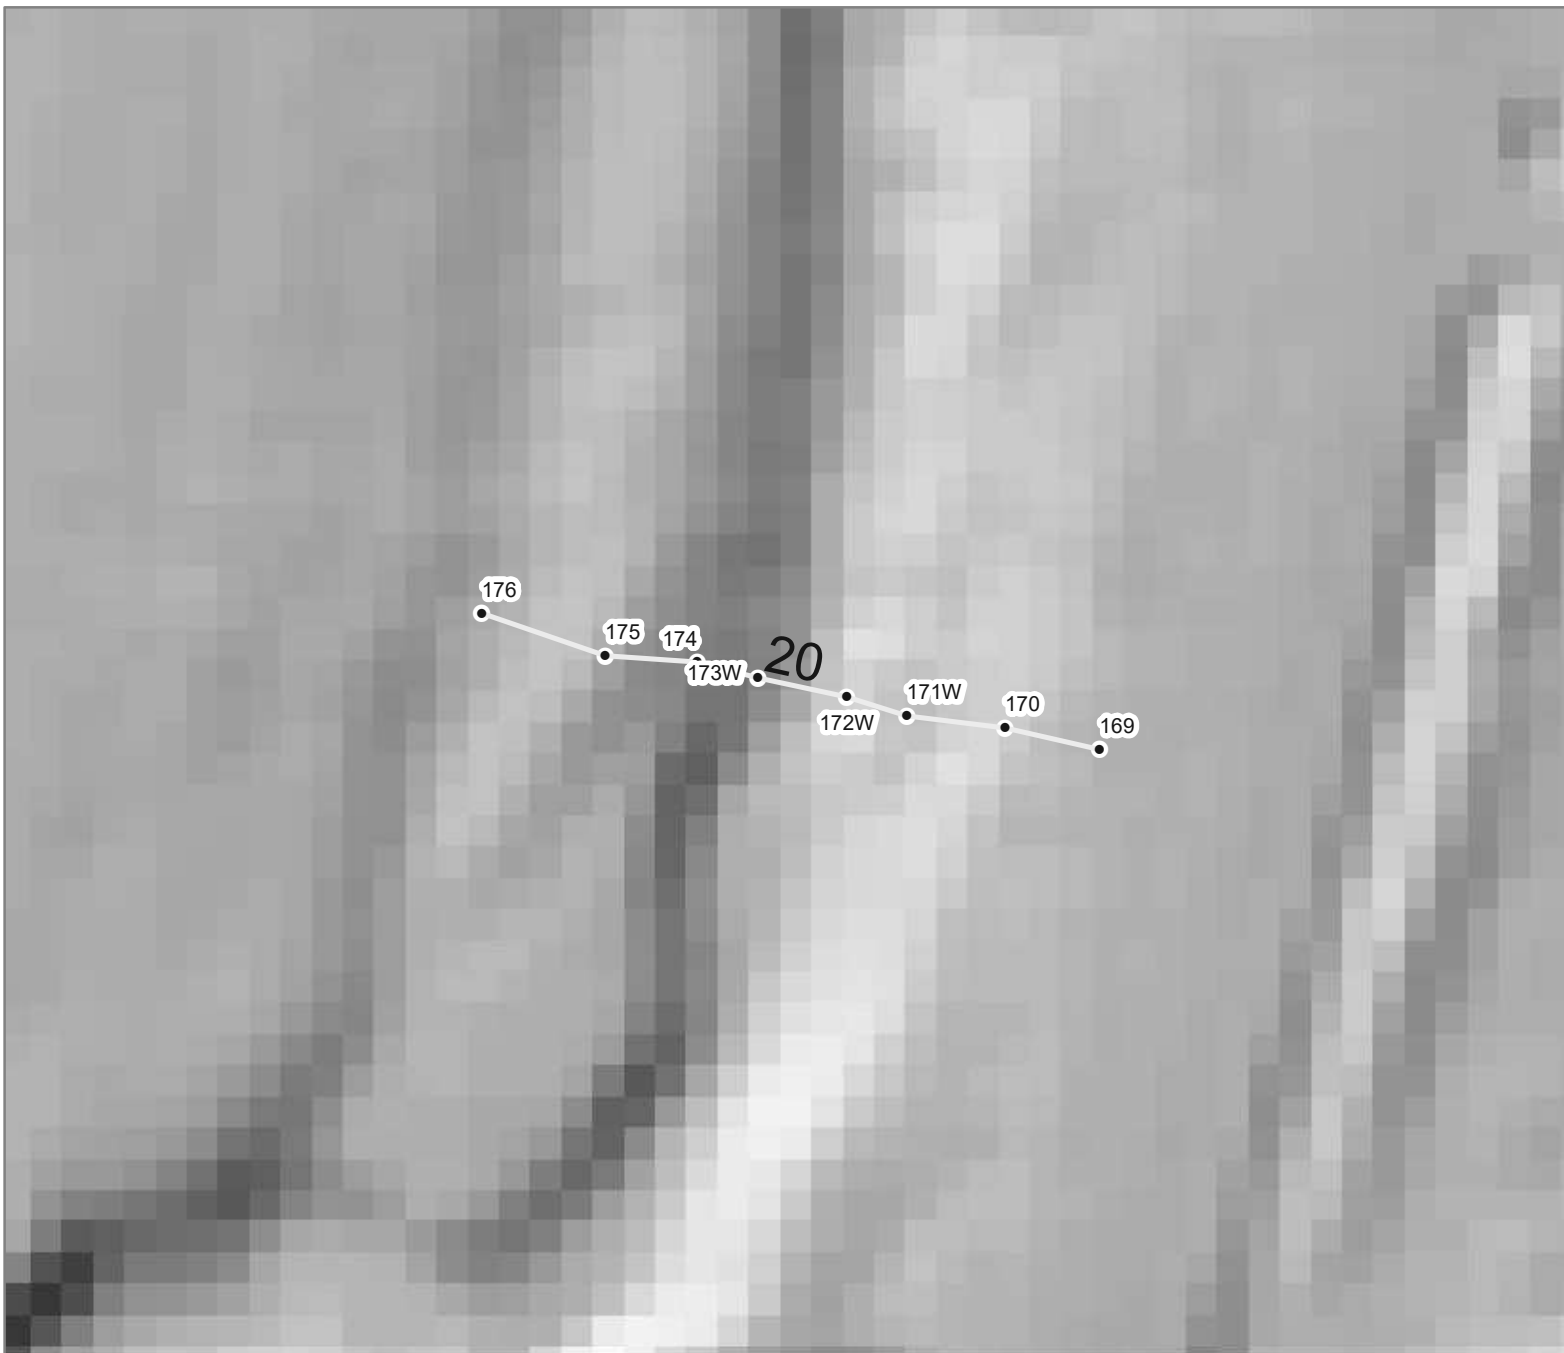

0 10 20 m

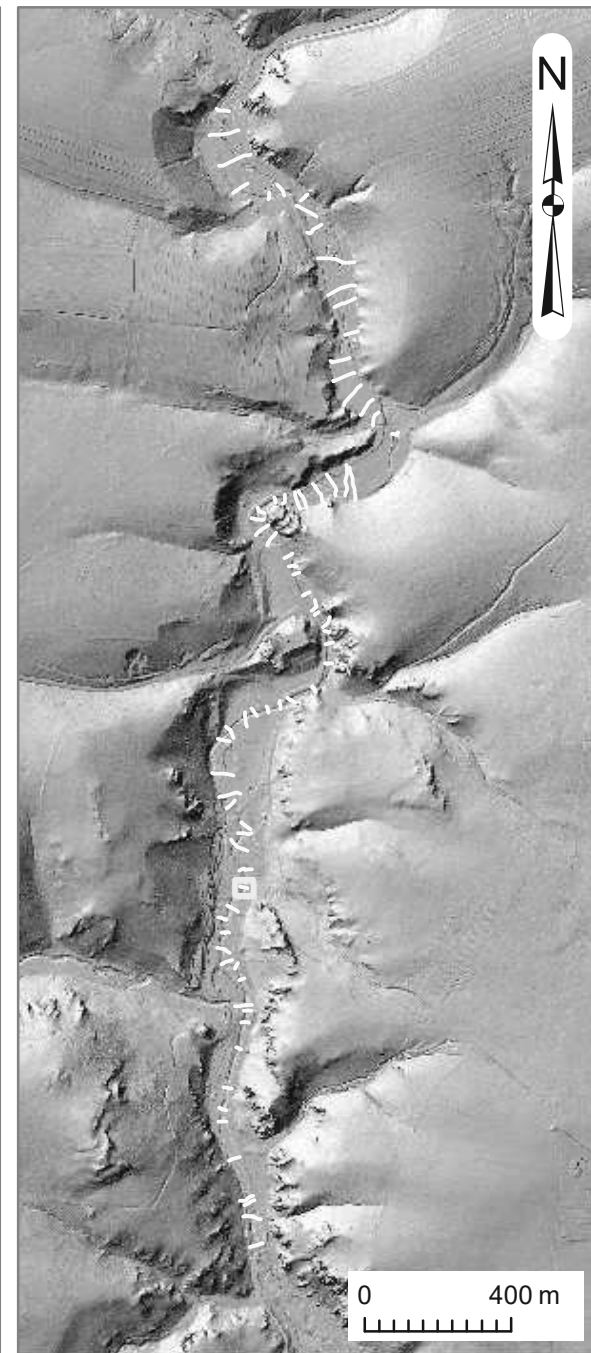

0 400 m

**Proile: 20** Analyses of the Prądnik riverbed shape based on archiva and contemporary data sets – old maps, LIDAR, DTMs and cross-sectional profile



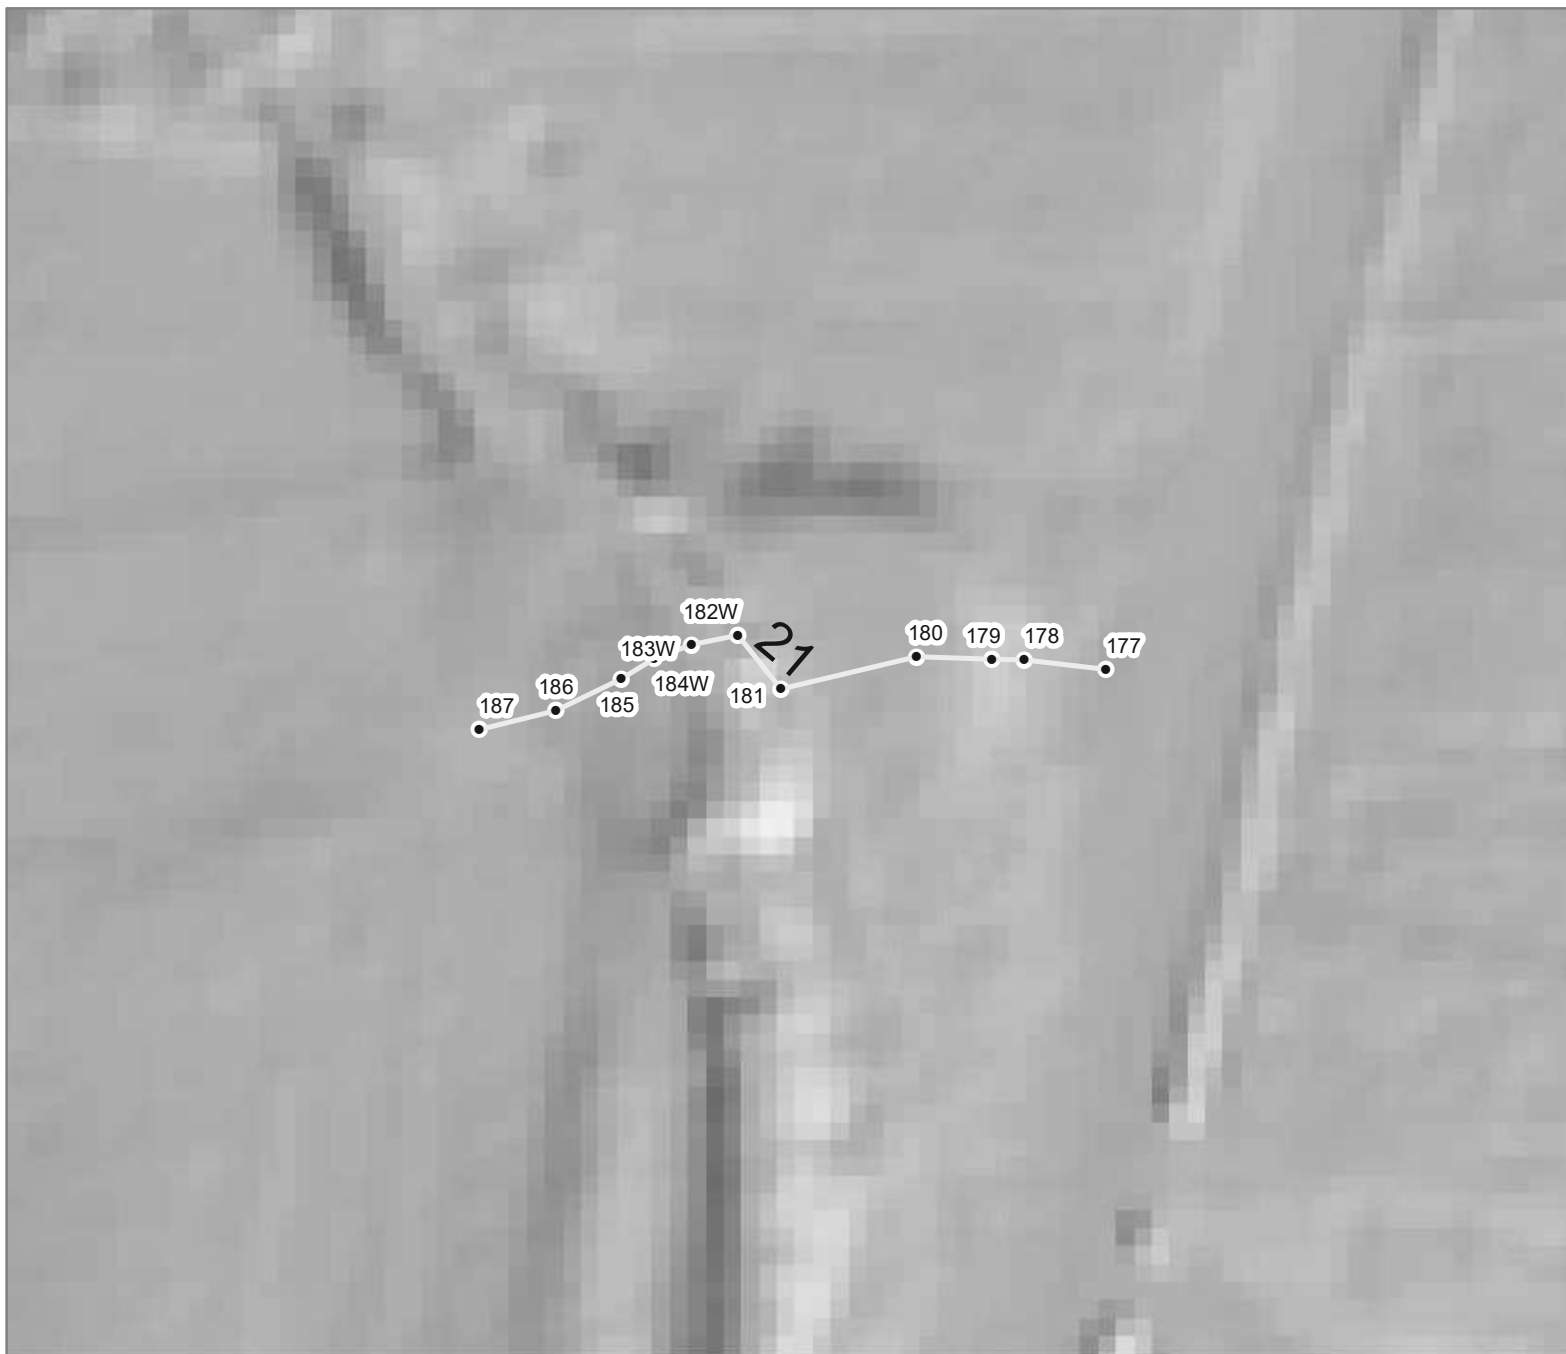

0 10 20 m

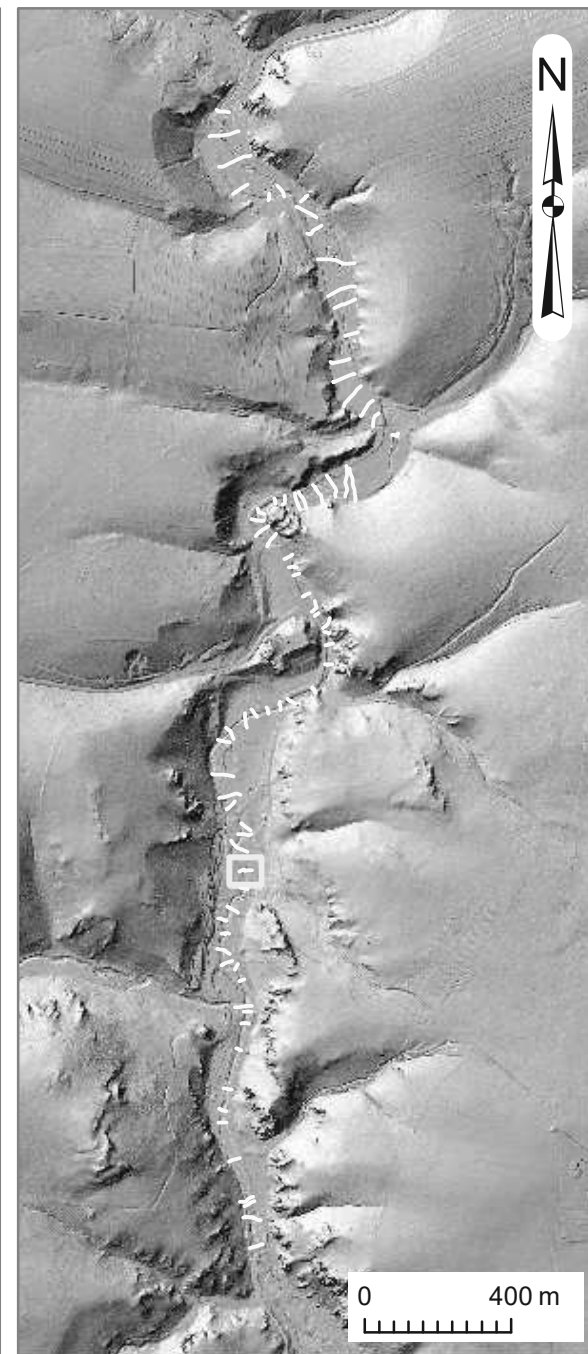

0 400 m

*Proile: 21* Analyses of the Prądnik riverbed shape based on archiva and contemporary data sets – old maps, LIDAR, DTMs and cross-sectional profile

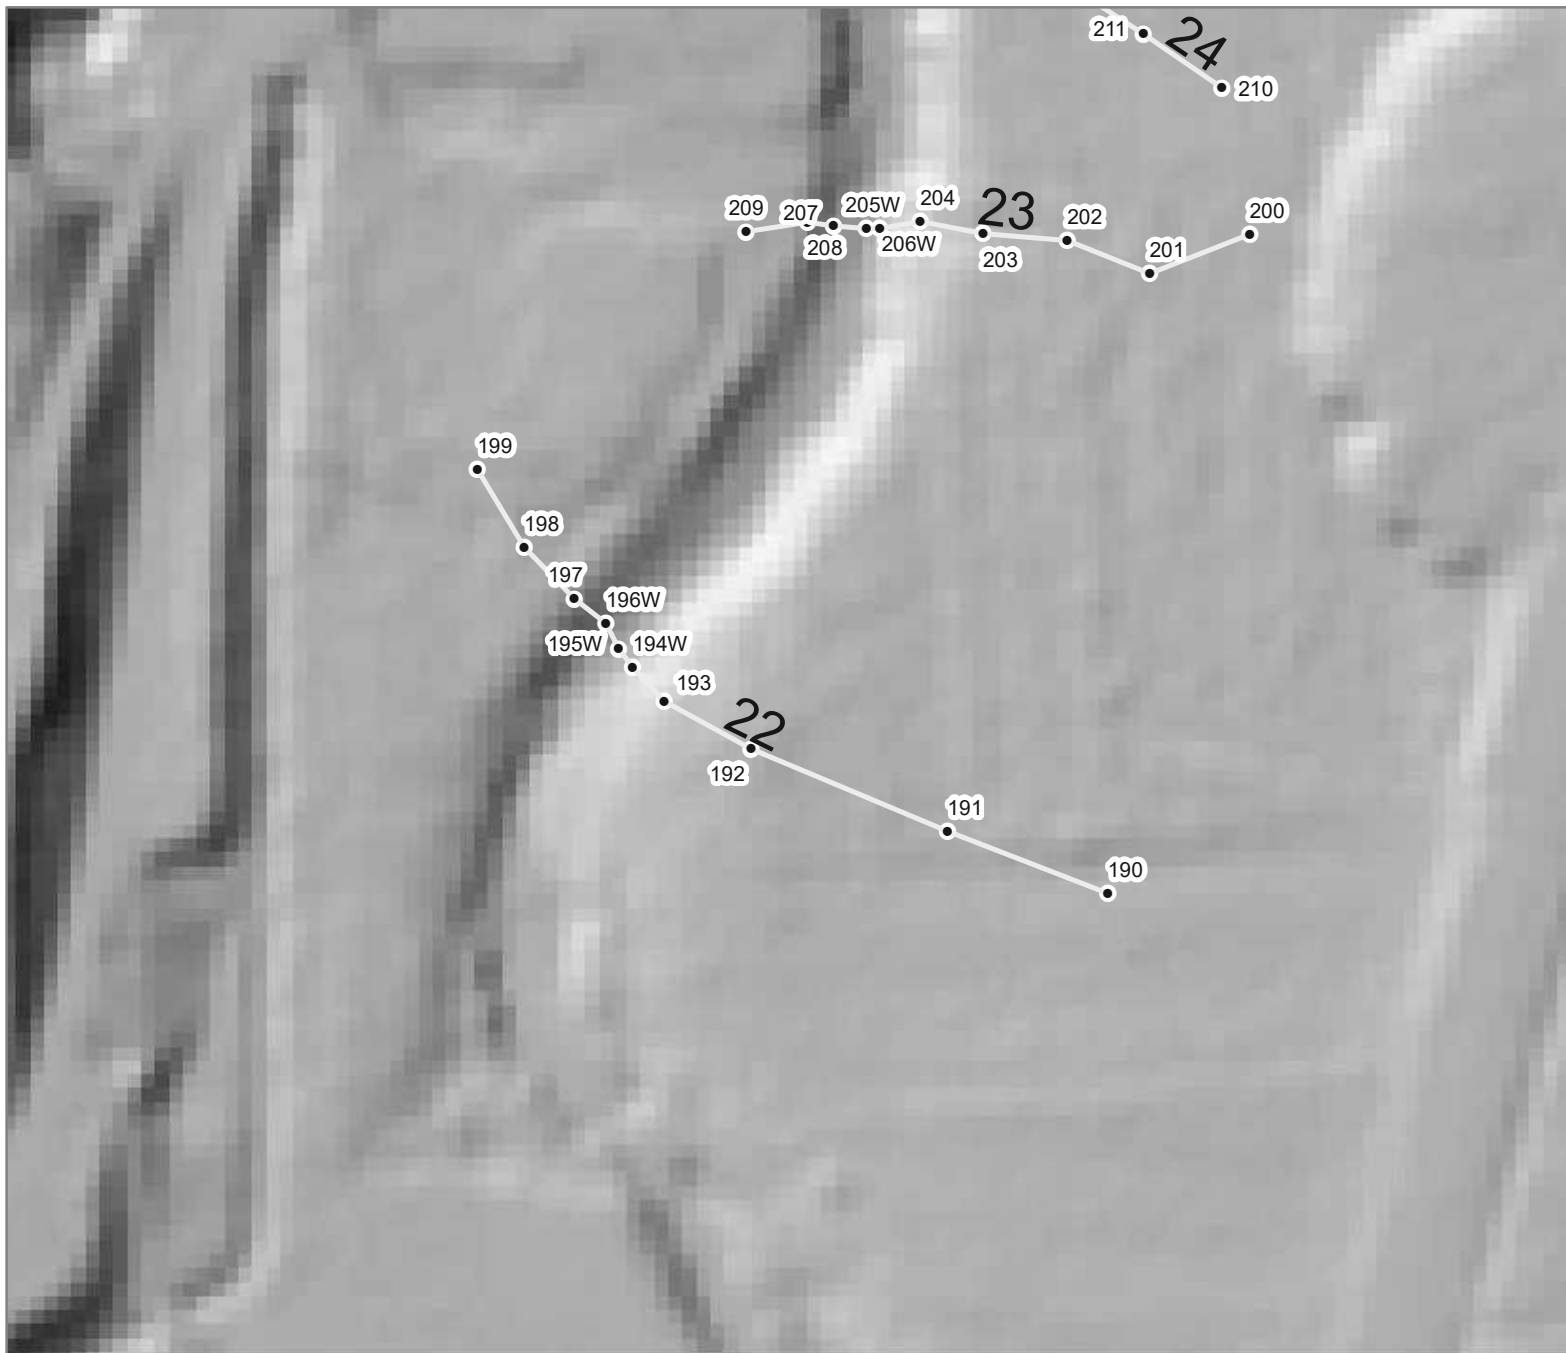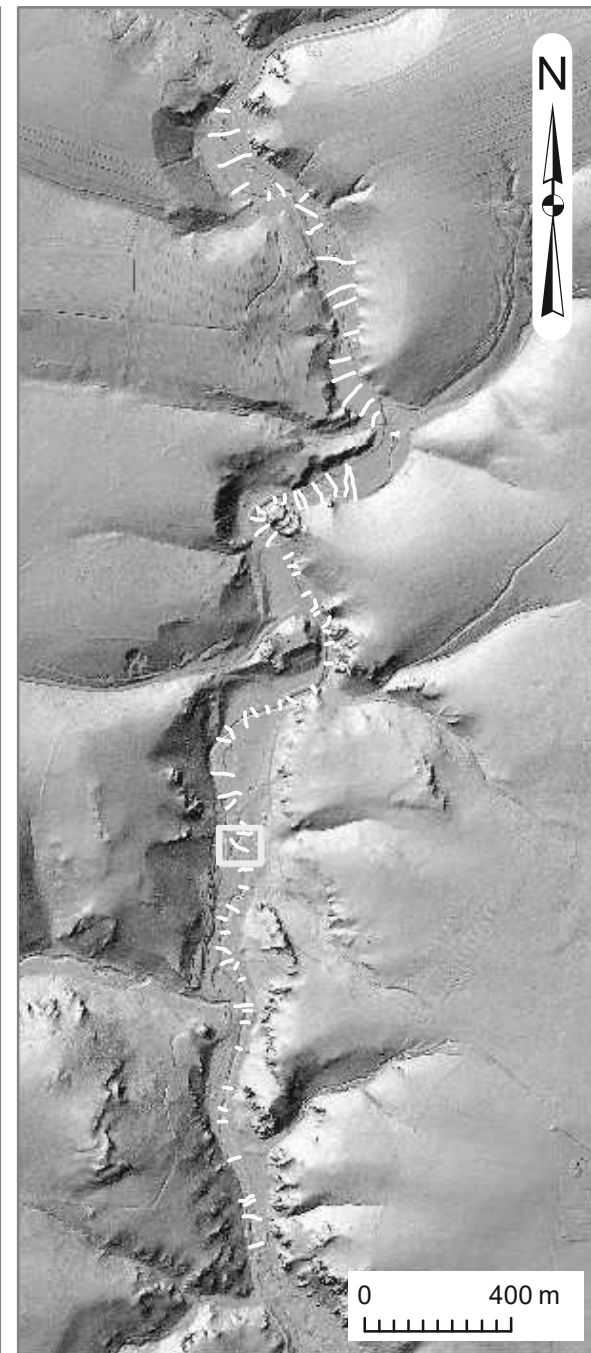

**Proile: 22** Analyses of the Prądnik riverbed shape based on archiva and contemporary data sets – old maps, LIDAR, DTMs and cross-sectional profile

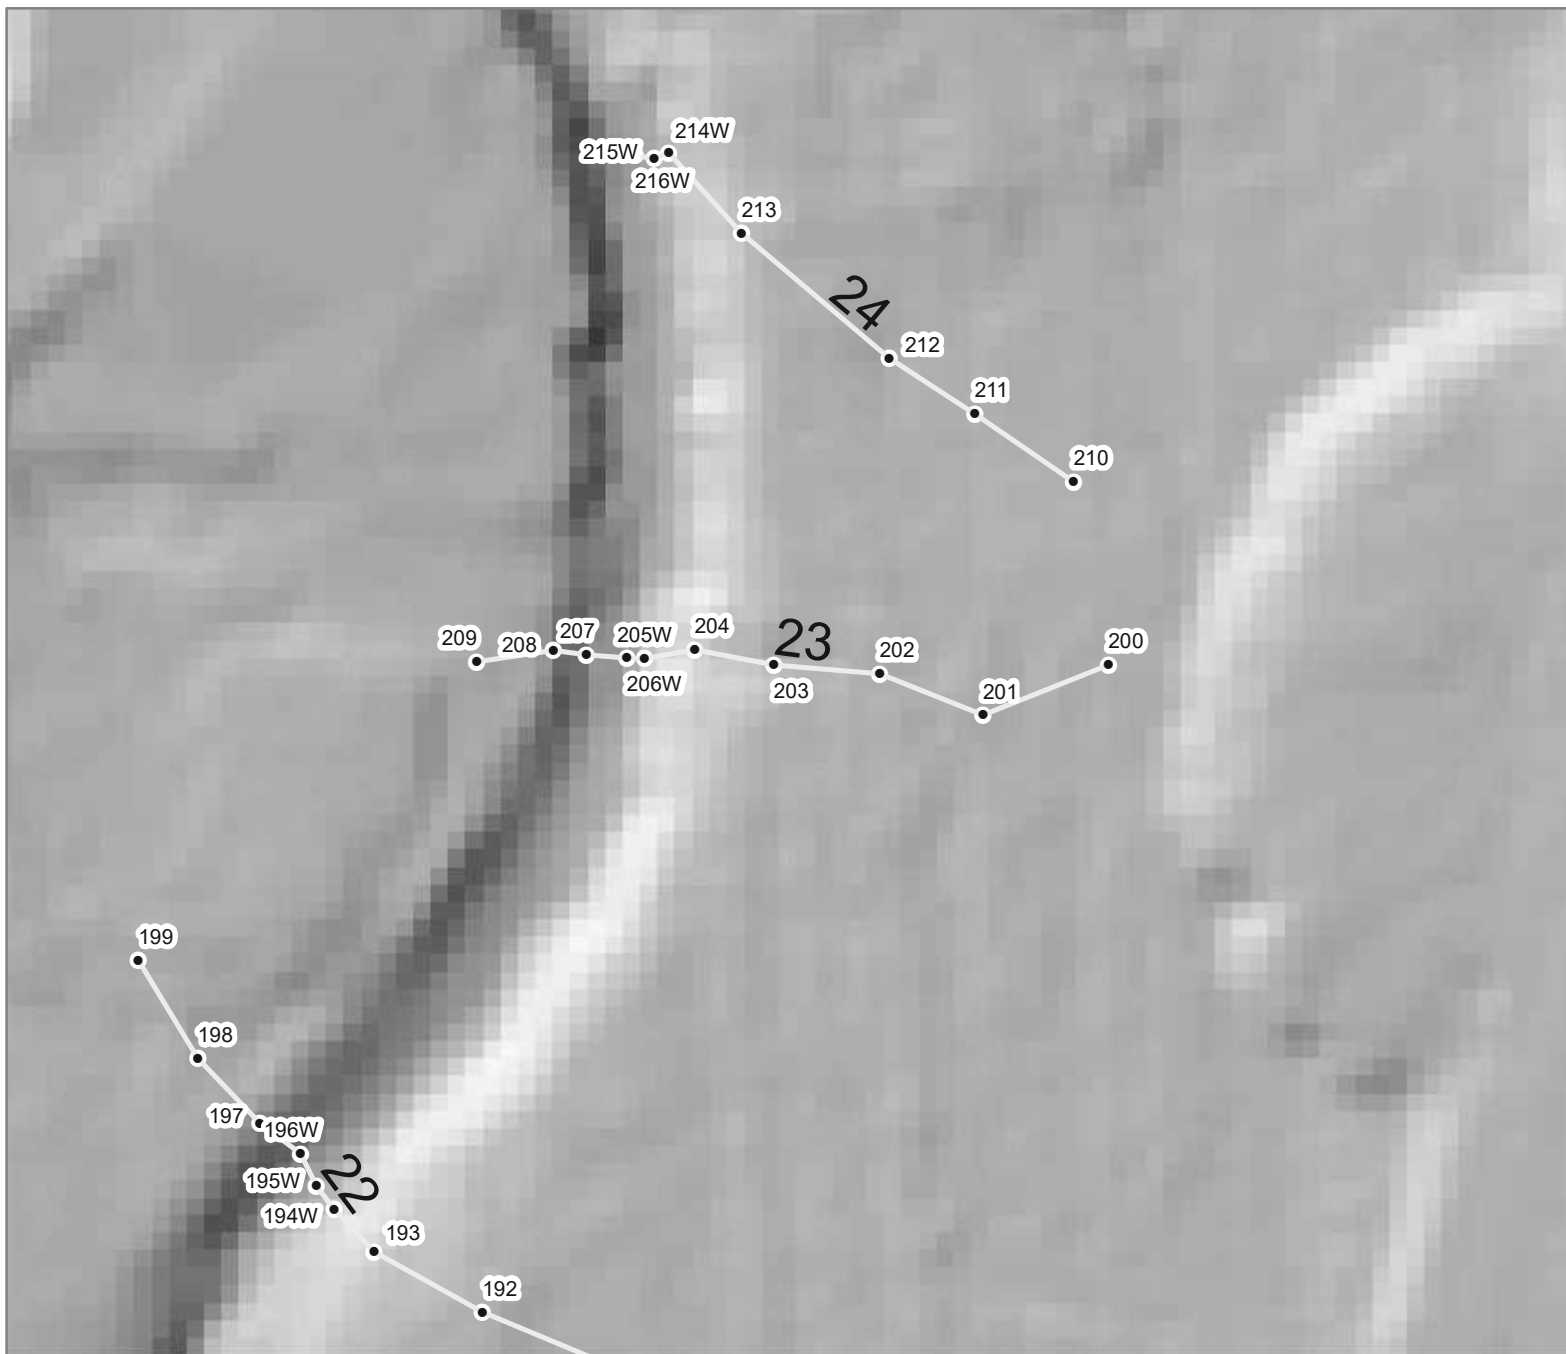

0 10 20 m

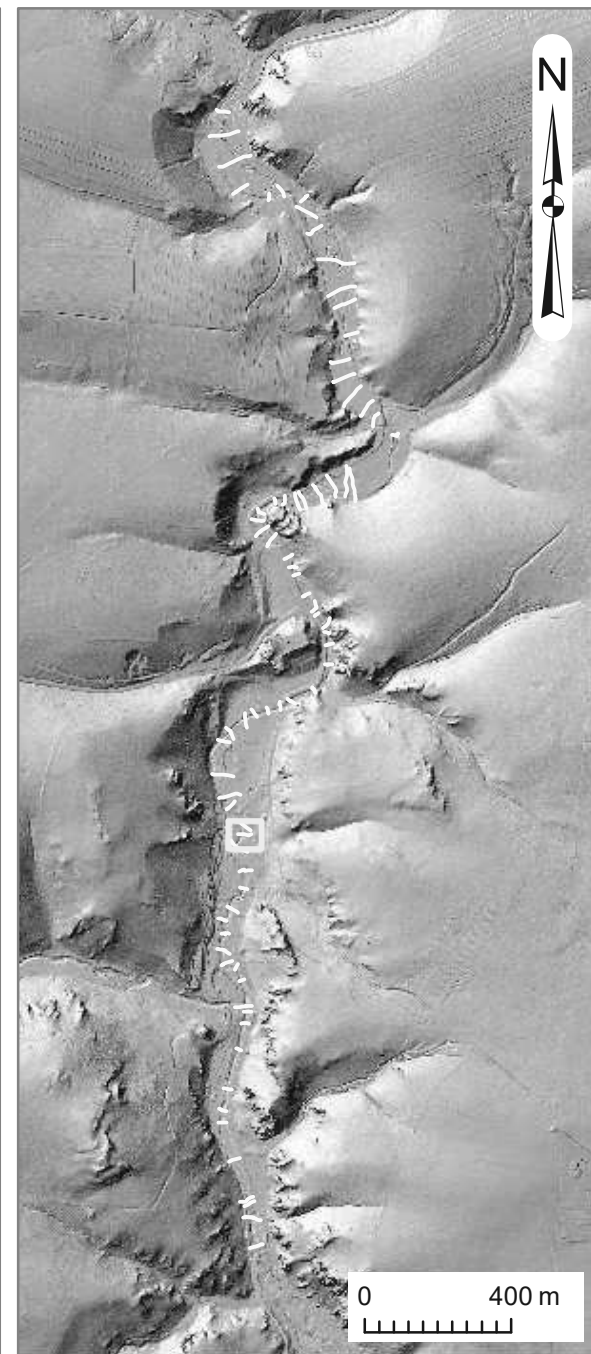

**Proile: 23** Analyses of the Prądnik riverbed shape based on archiva and contemporary data sets – old maps, LIDAR, DTMs and cross-sectional profile

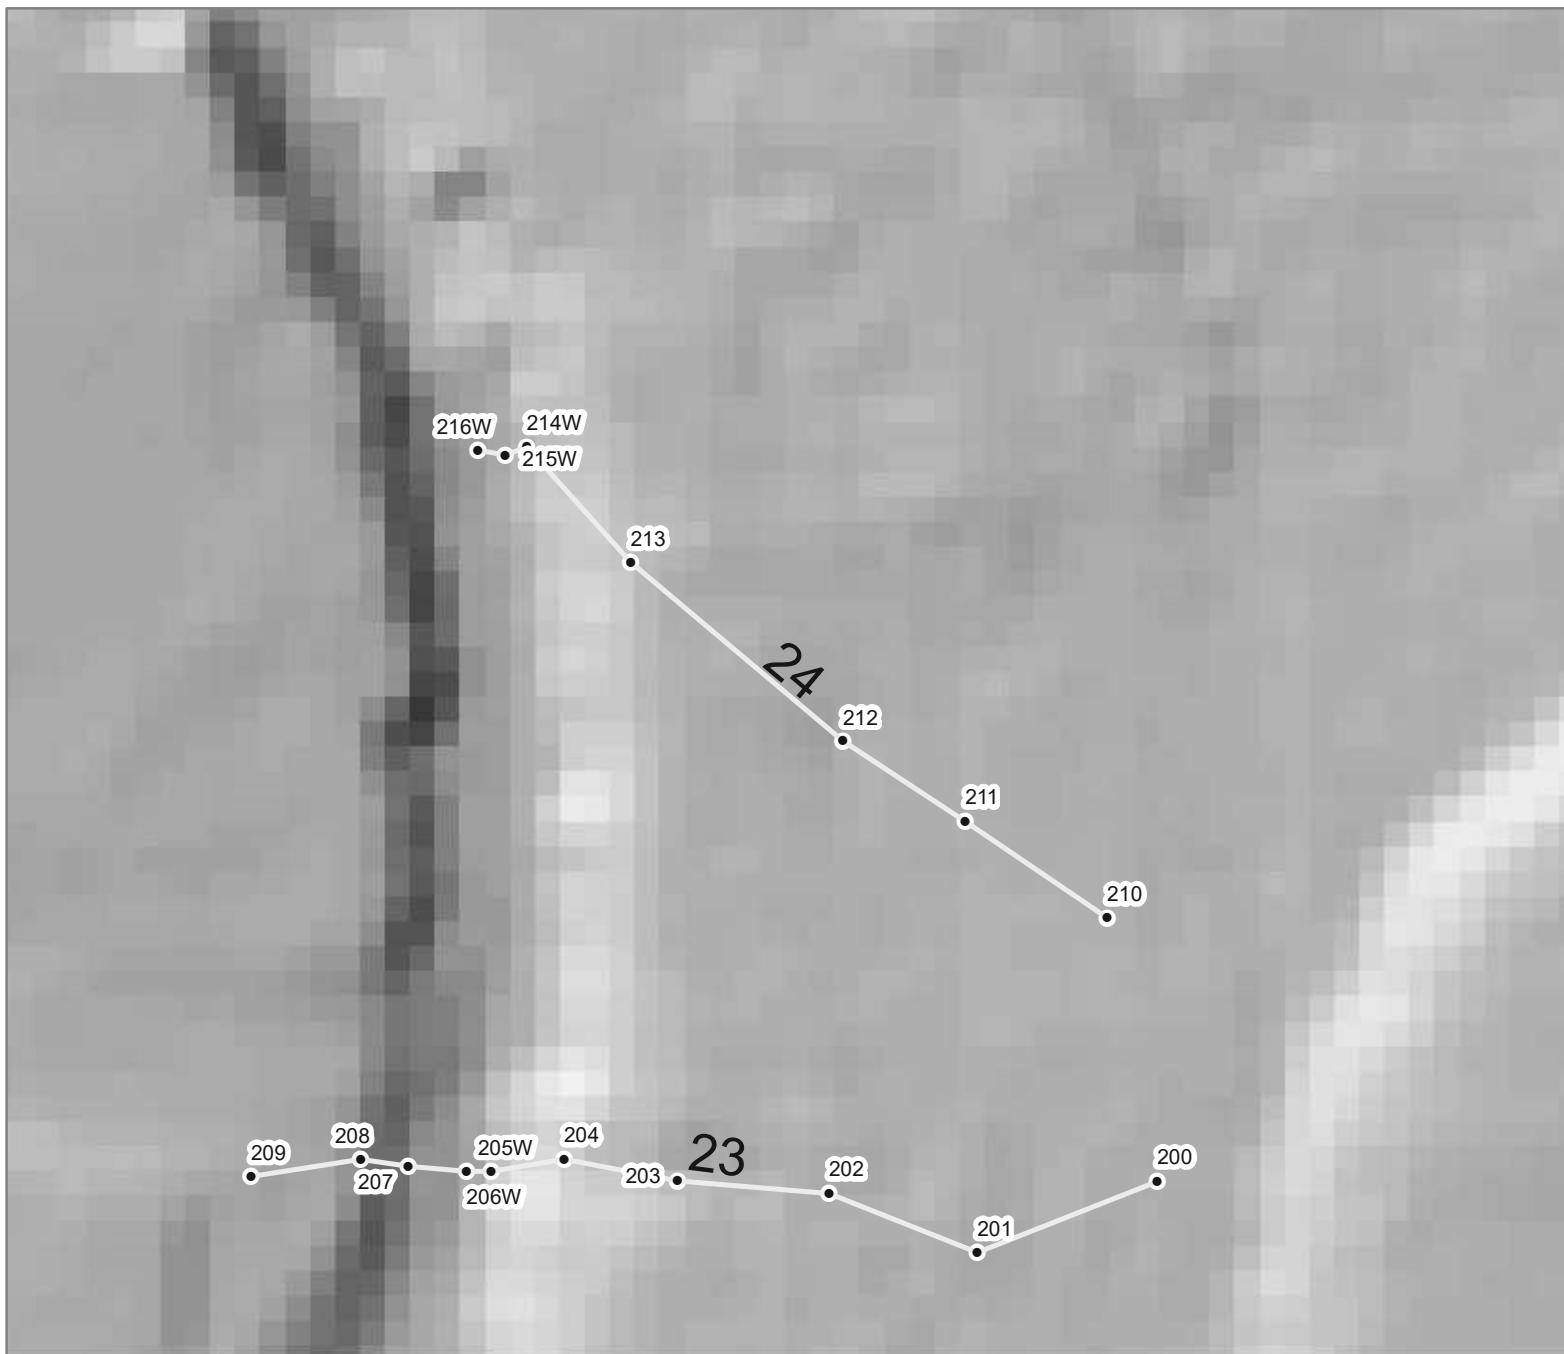

0 10 20 m

*Proile: 24* Analyses of the Prądnik riverbed shape based on archiva and contemporary data sets – old maps, LIDAR, DTMs and cross-sectional profile

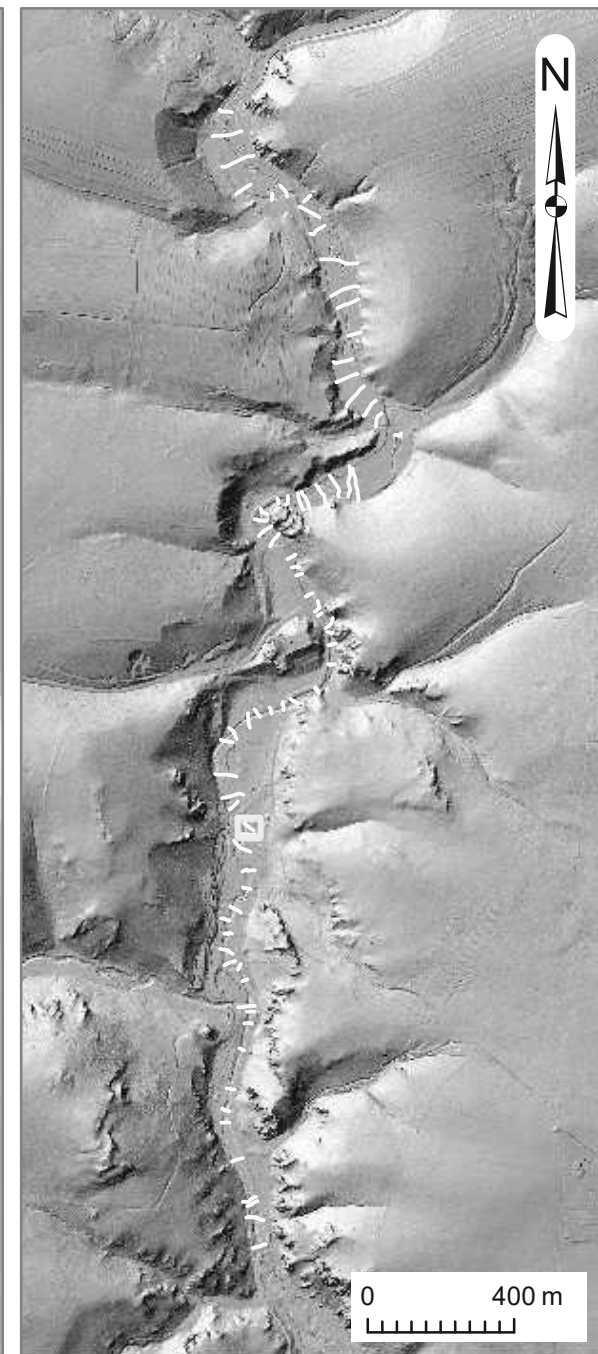

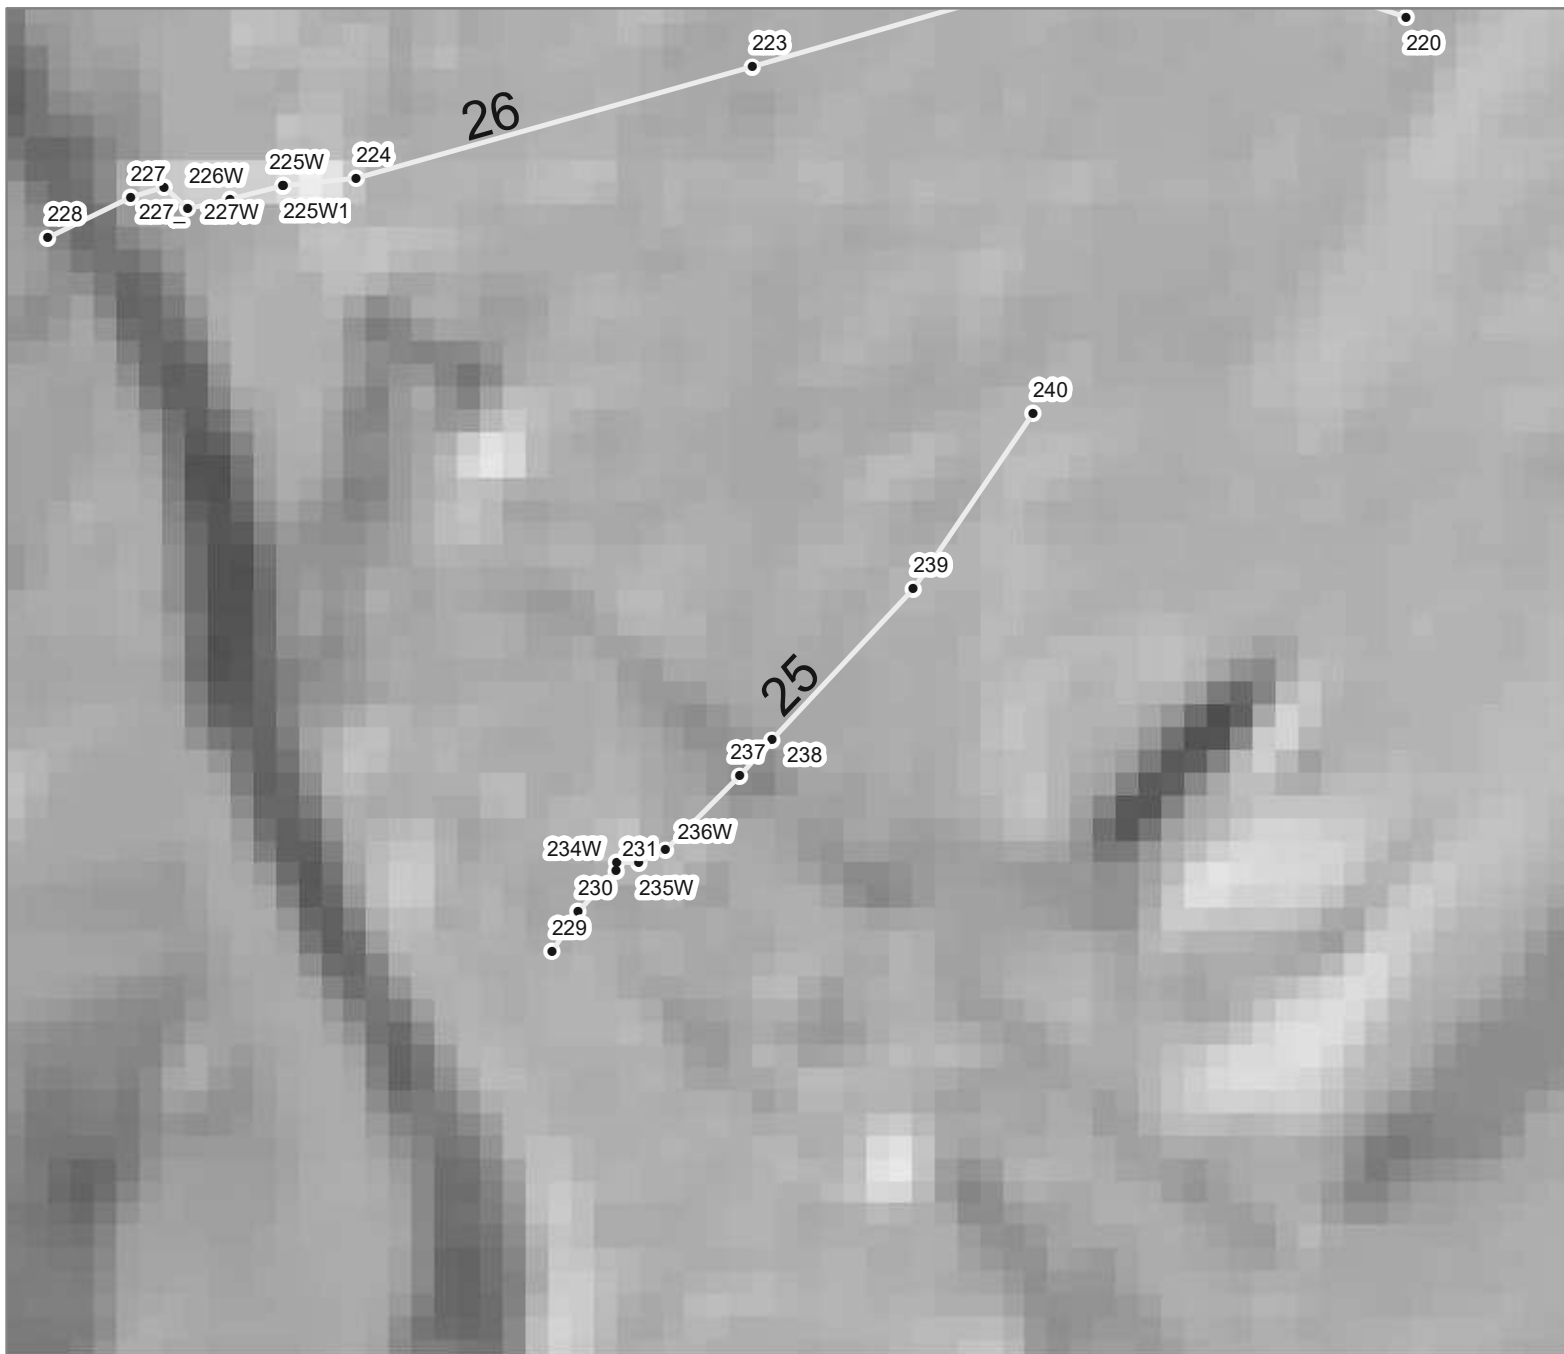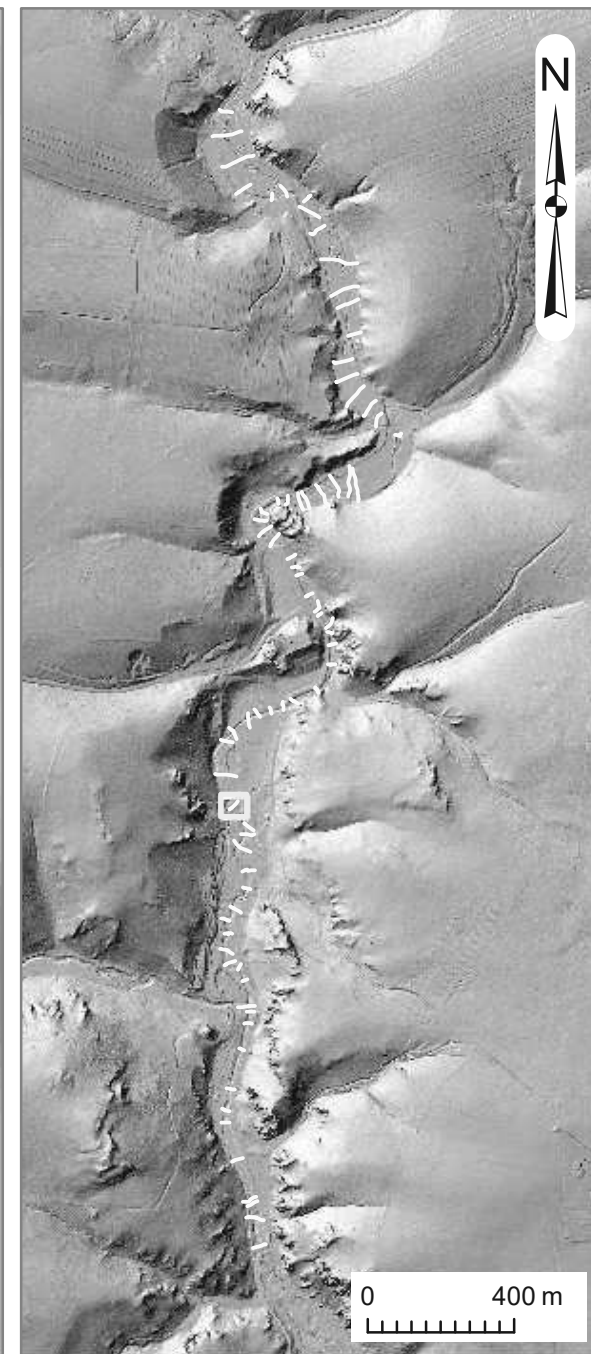

**Proile: 25** Analyses of the Prądnik riverbed shape based on archiva and contemporary data sets – old maps, LIDAR, DTMs and cross-sectional profile

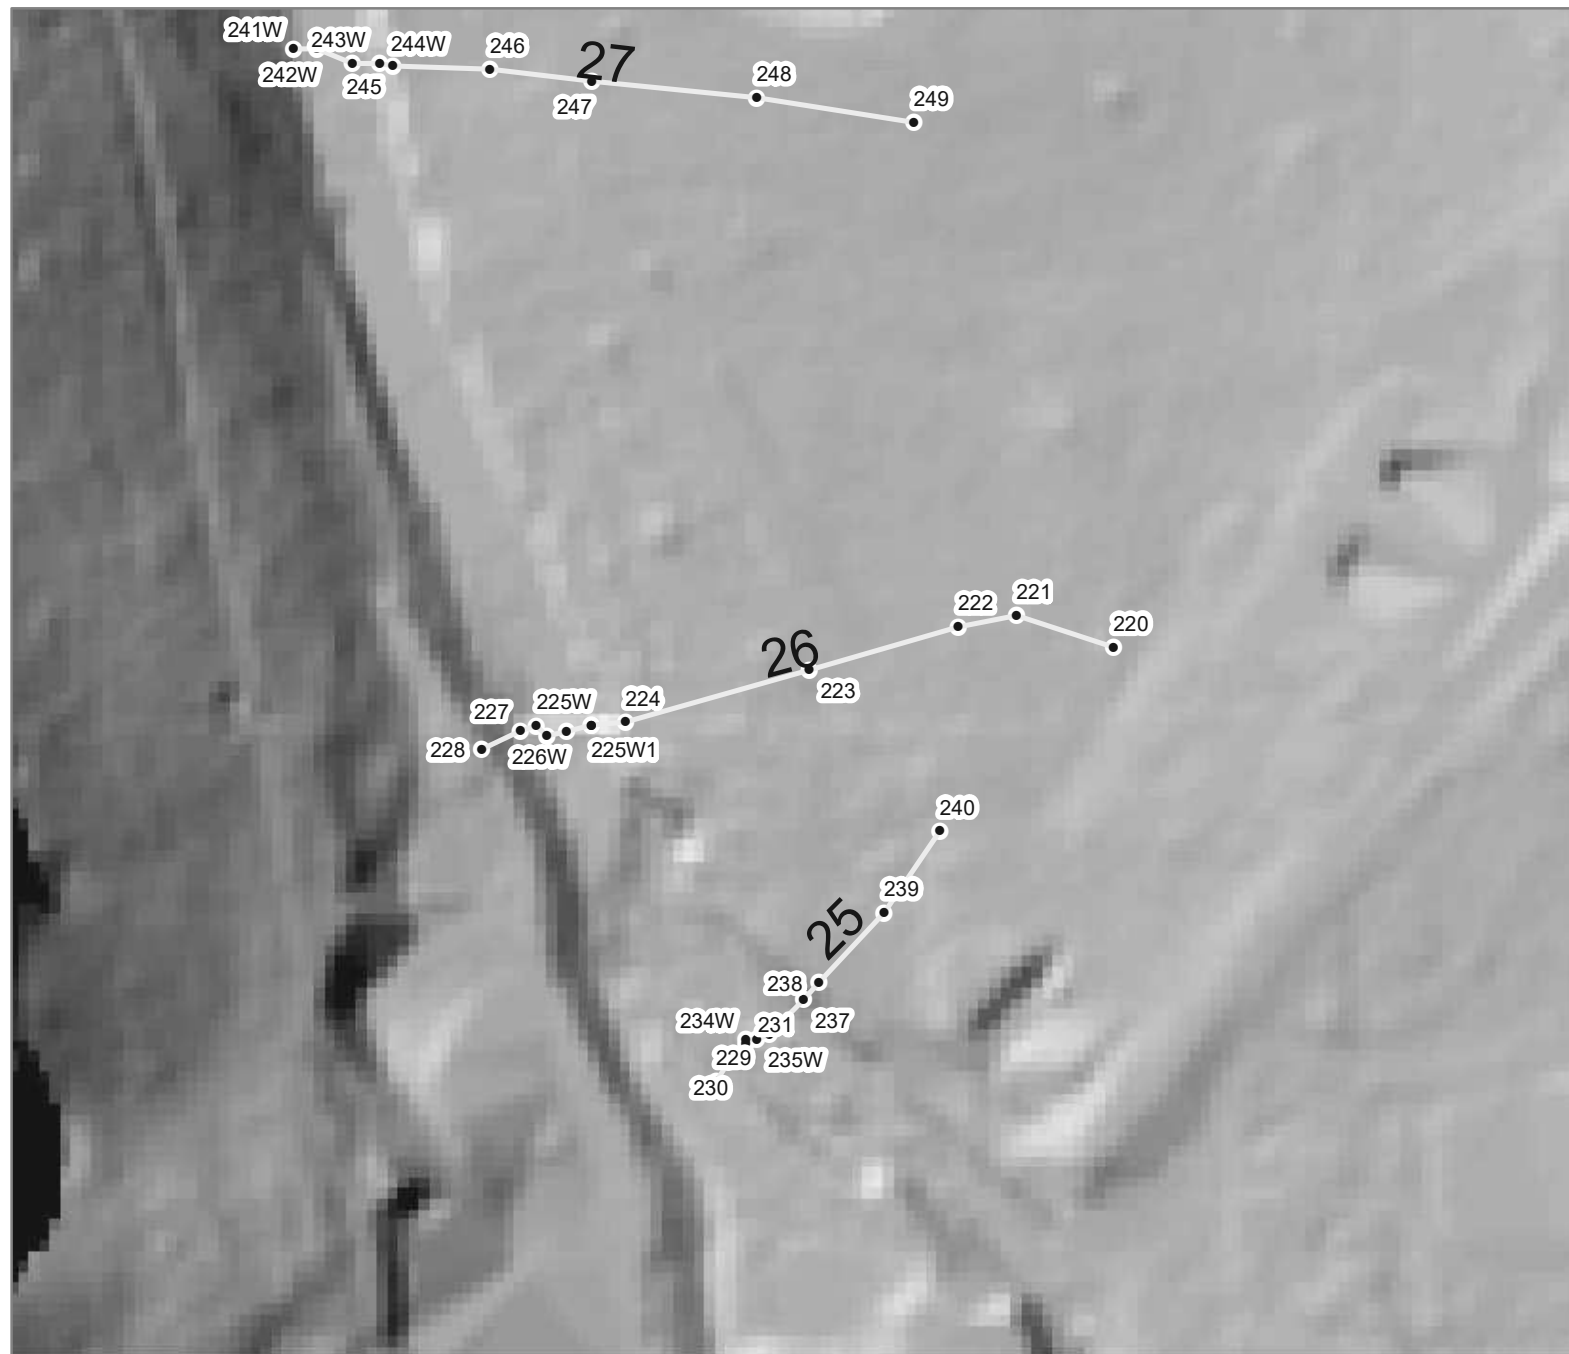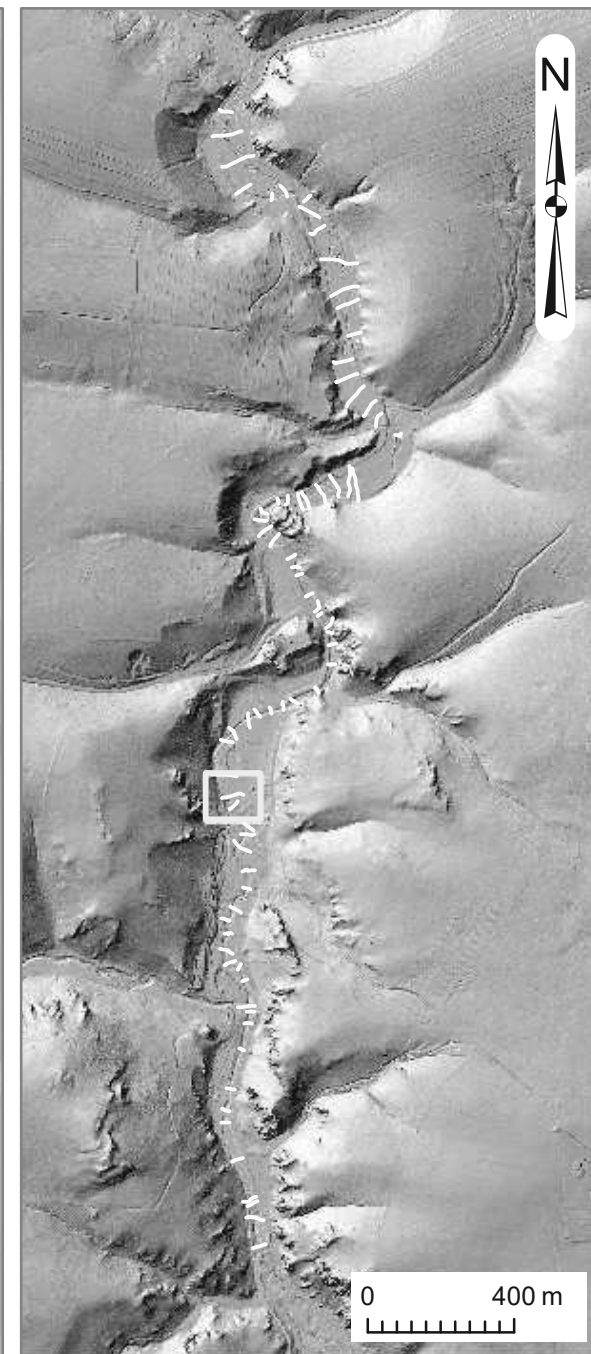

*Proile: 26* Analyses of the Prądnik riverbed shape based on archiva and contemporary data sets – old maps, LIDAR, DTMs and cross-sectional profile



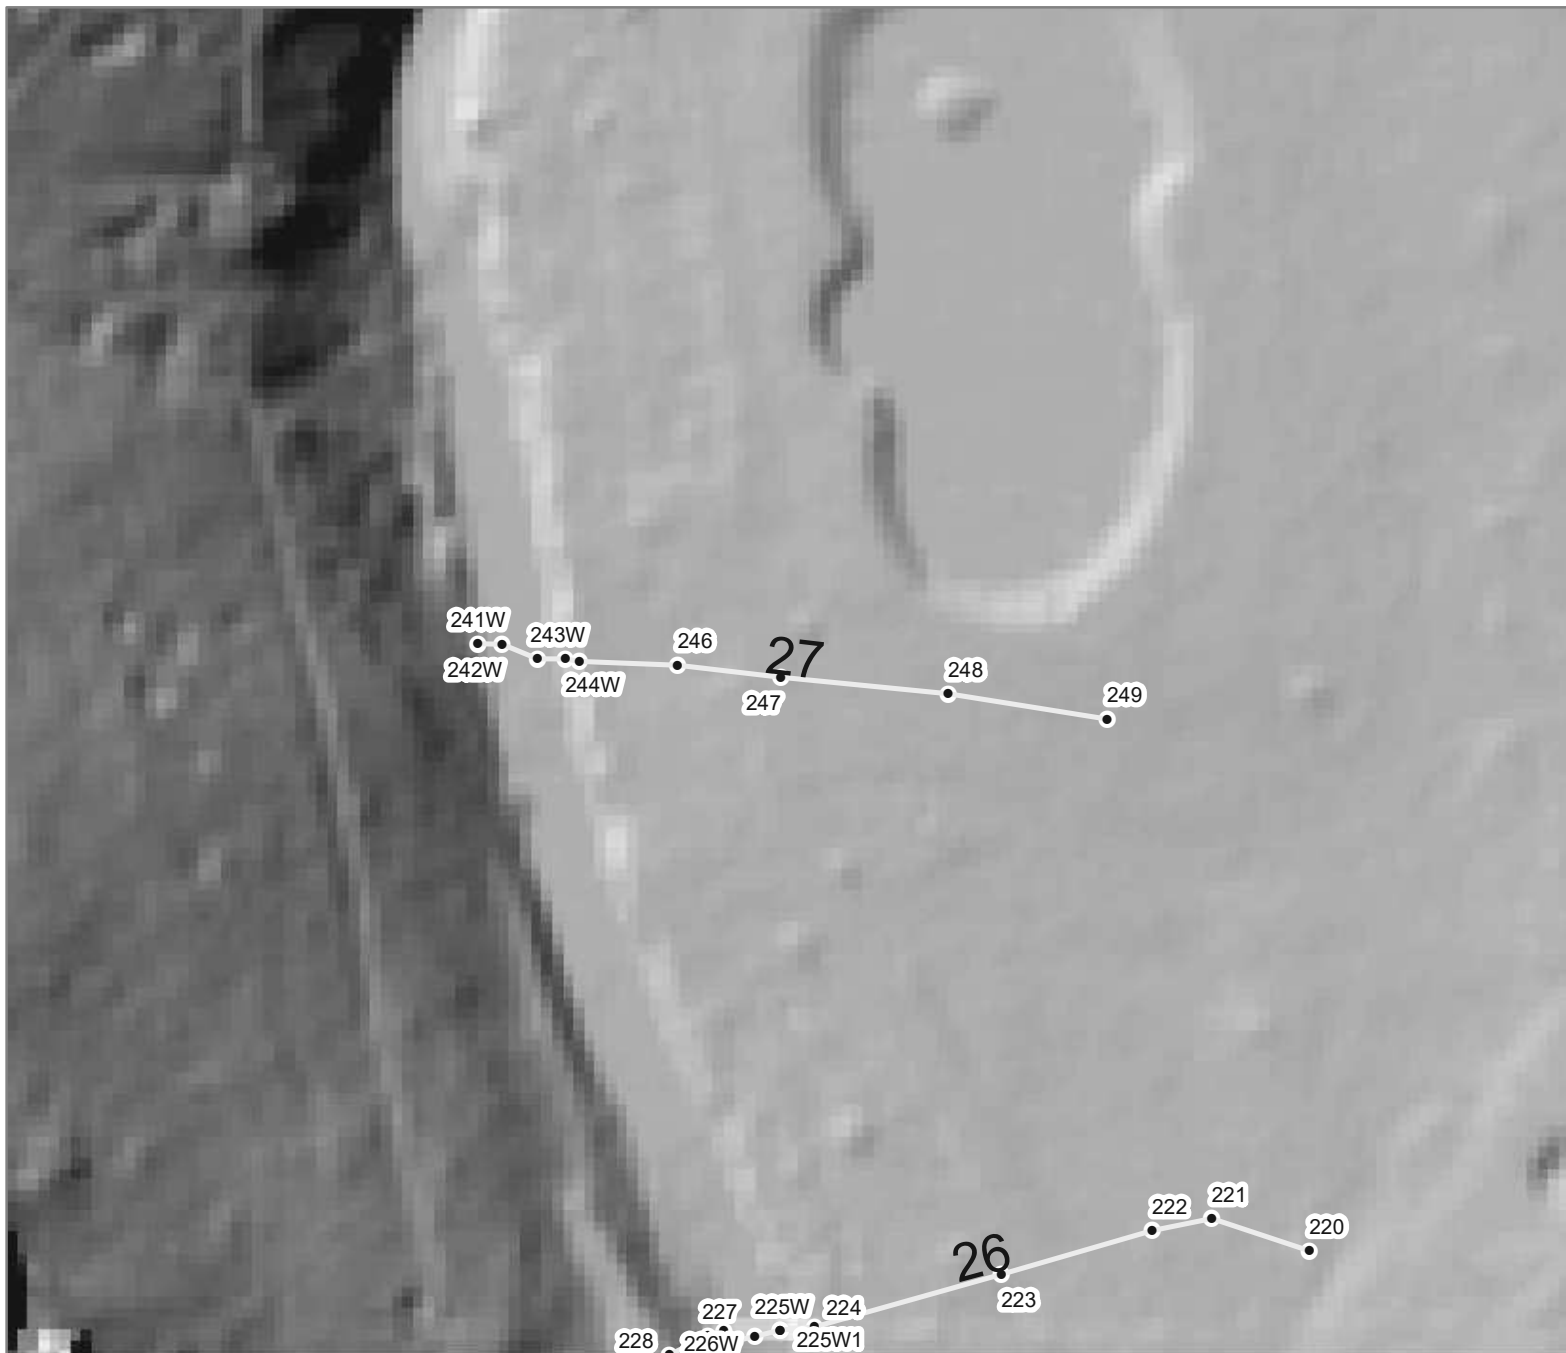

0 10 20 m

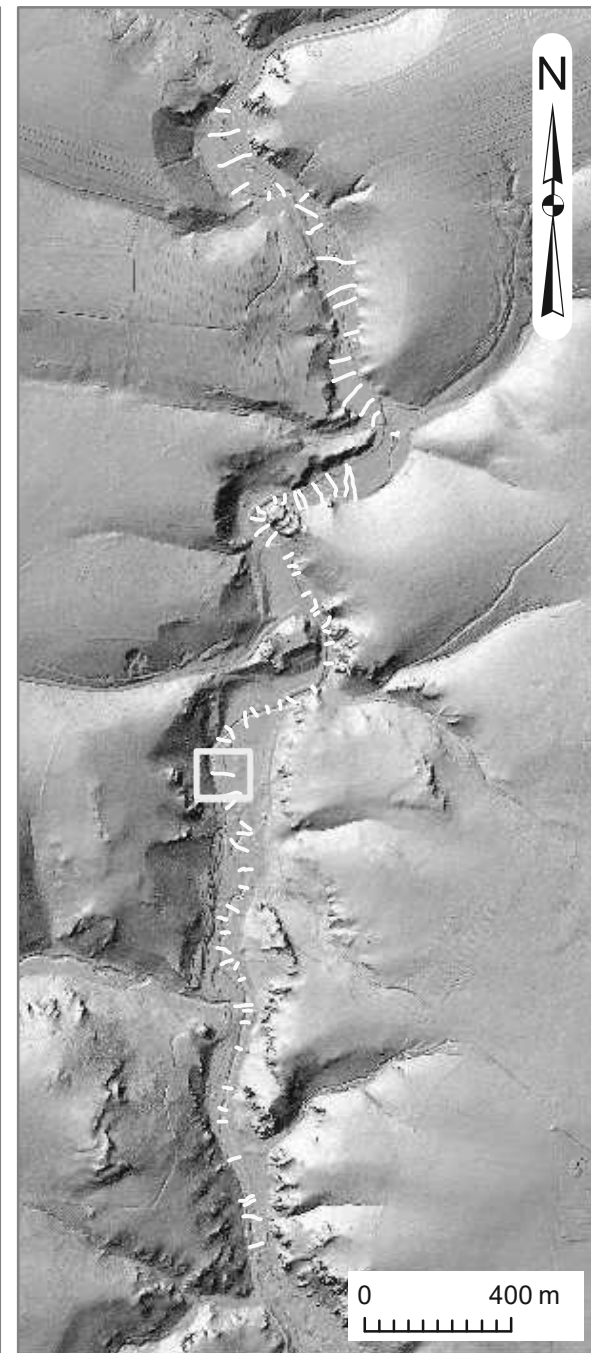

0 400 m

*Proile: 27* Analyses of the Prądnik riverbed shape based on archiva and contemporary data sets – old maps, LIDAR, DTMs and cross-sectional profile

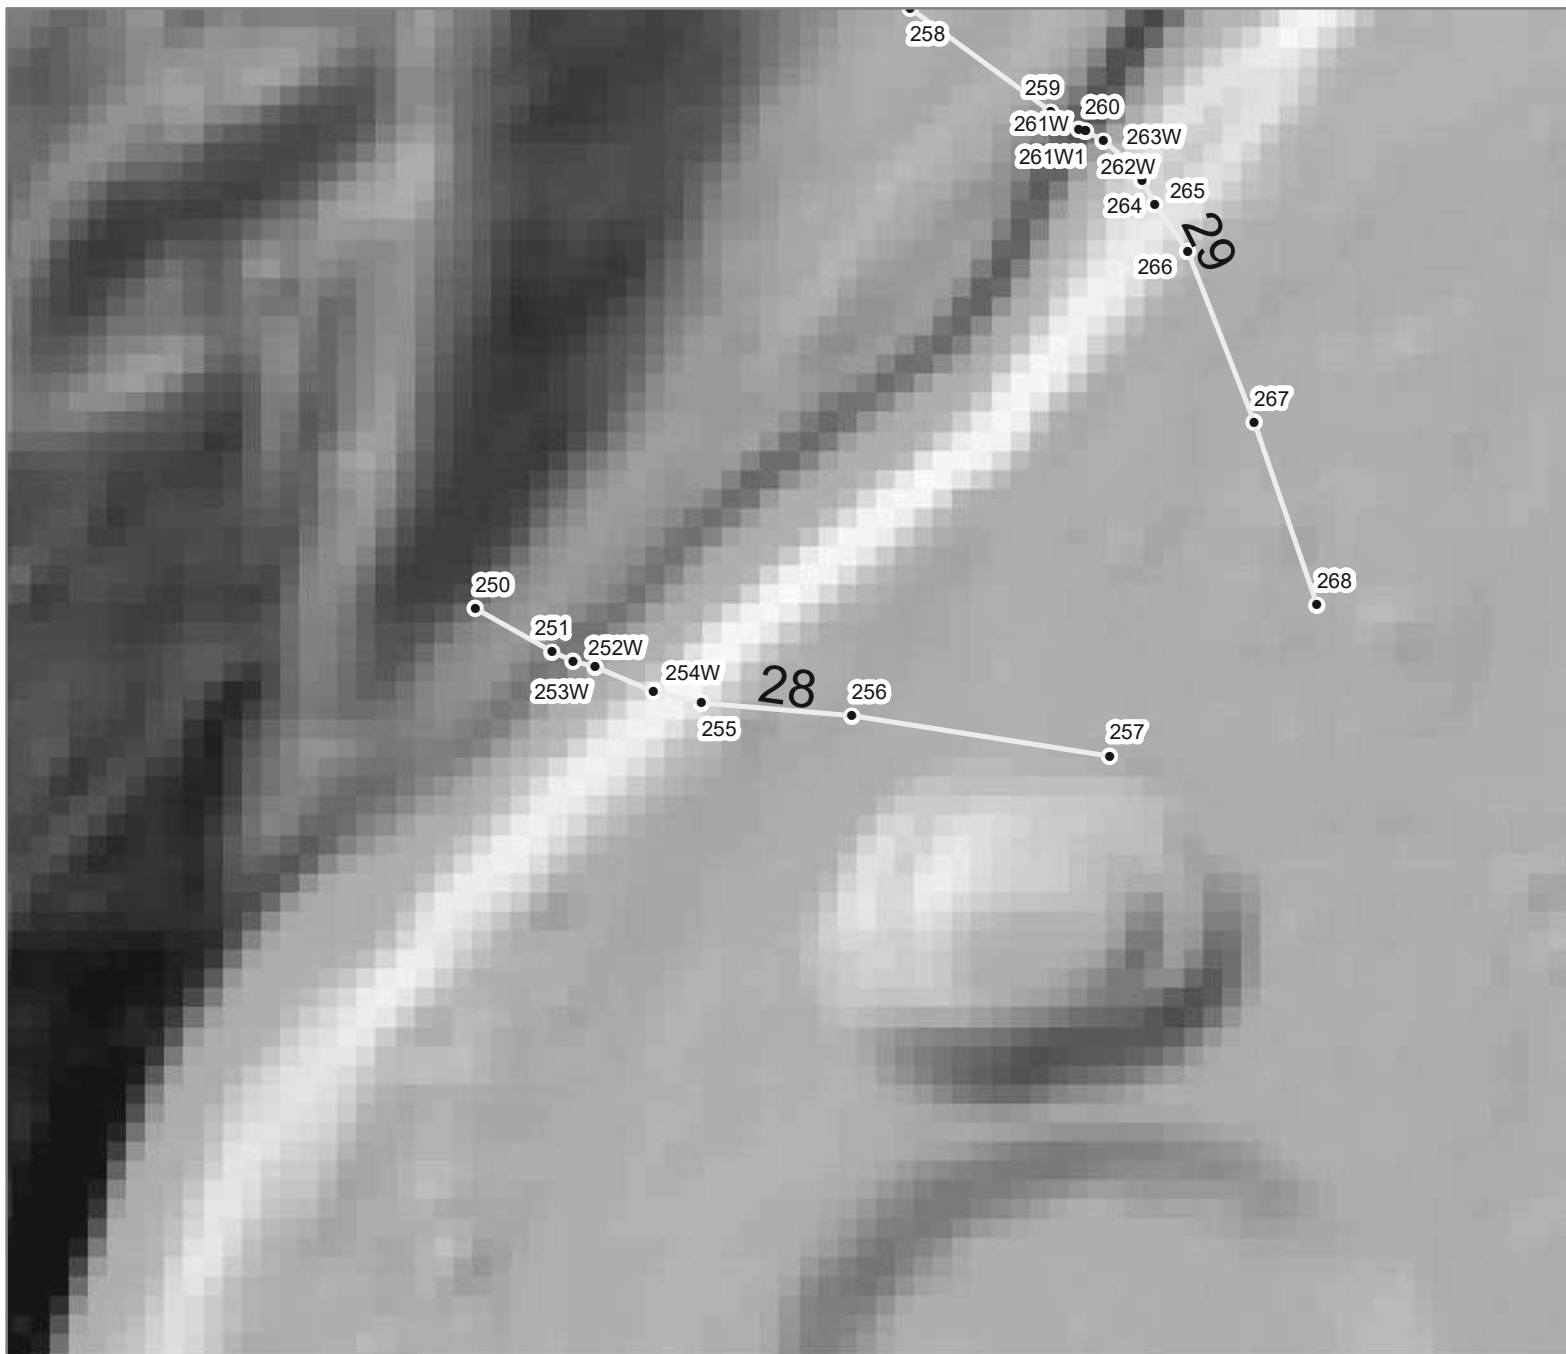

0 10 20 m

*Proile: 28* Analyses of the Prądnik riverbed shape based on archiva and contemporary data sets – old maps, LIDAR, DTMs and cross-sectional profile

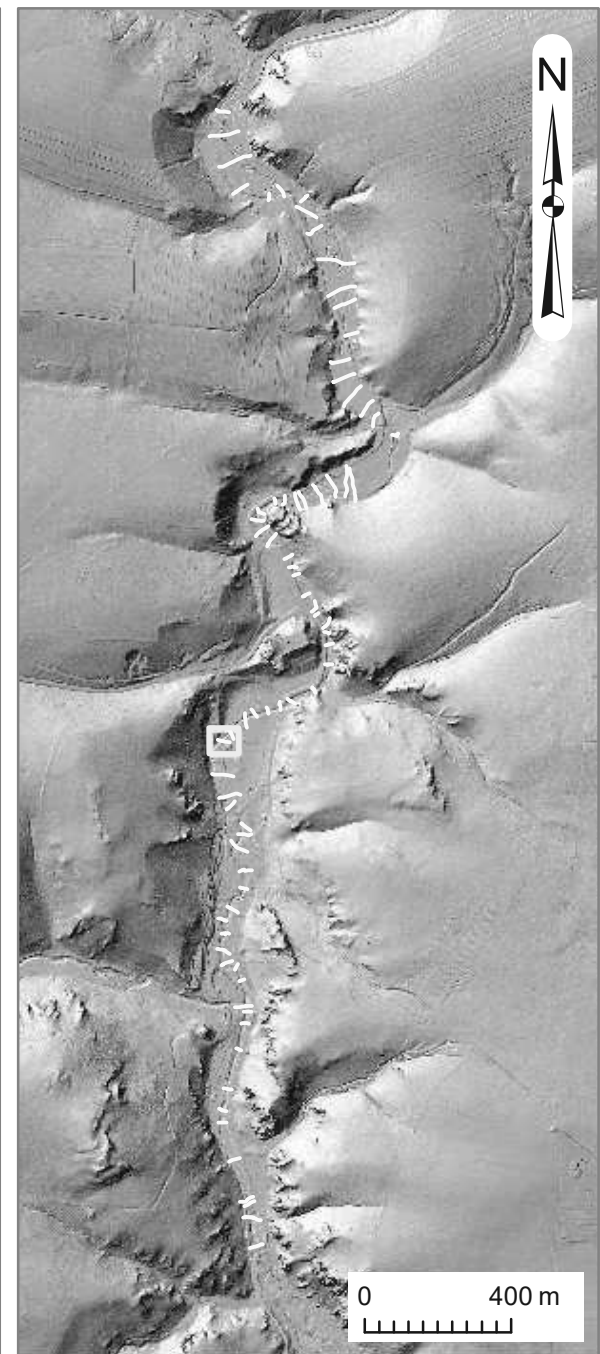

0 400 m

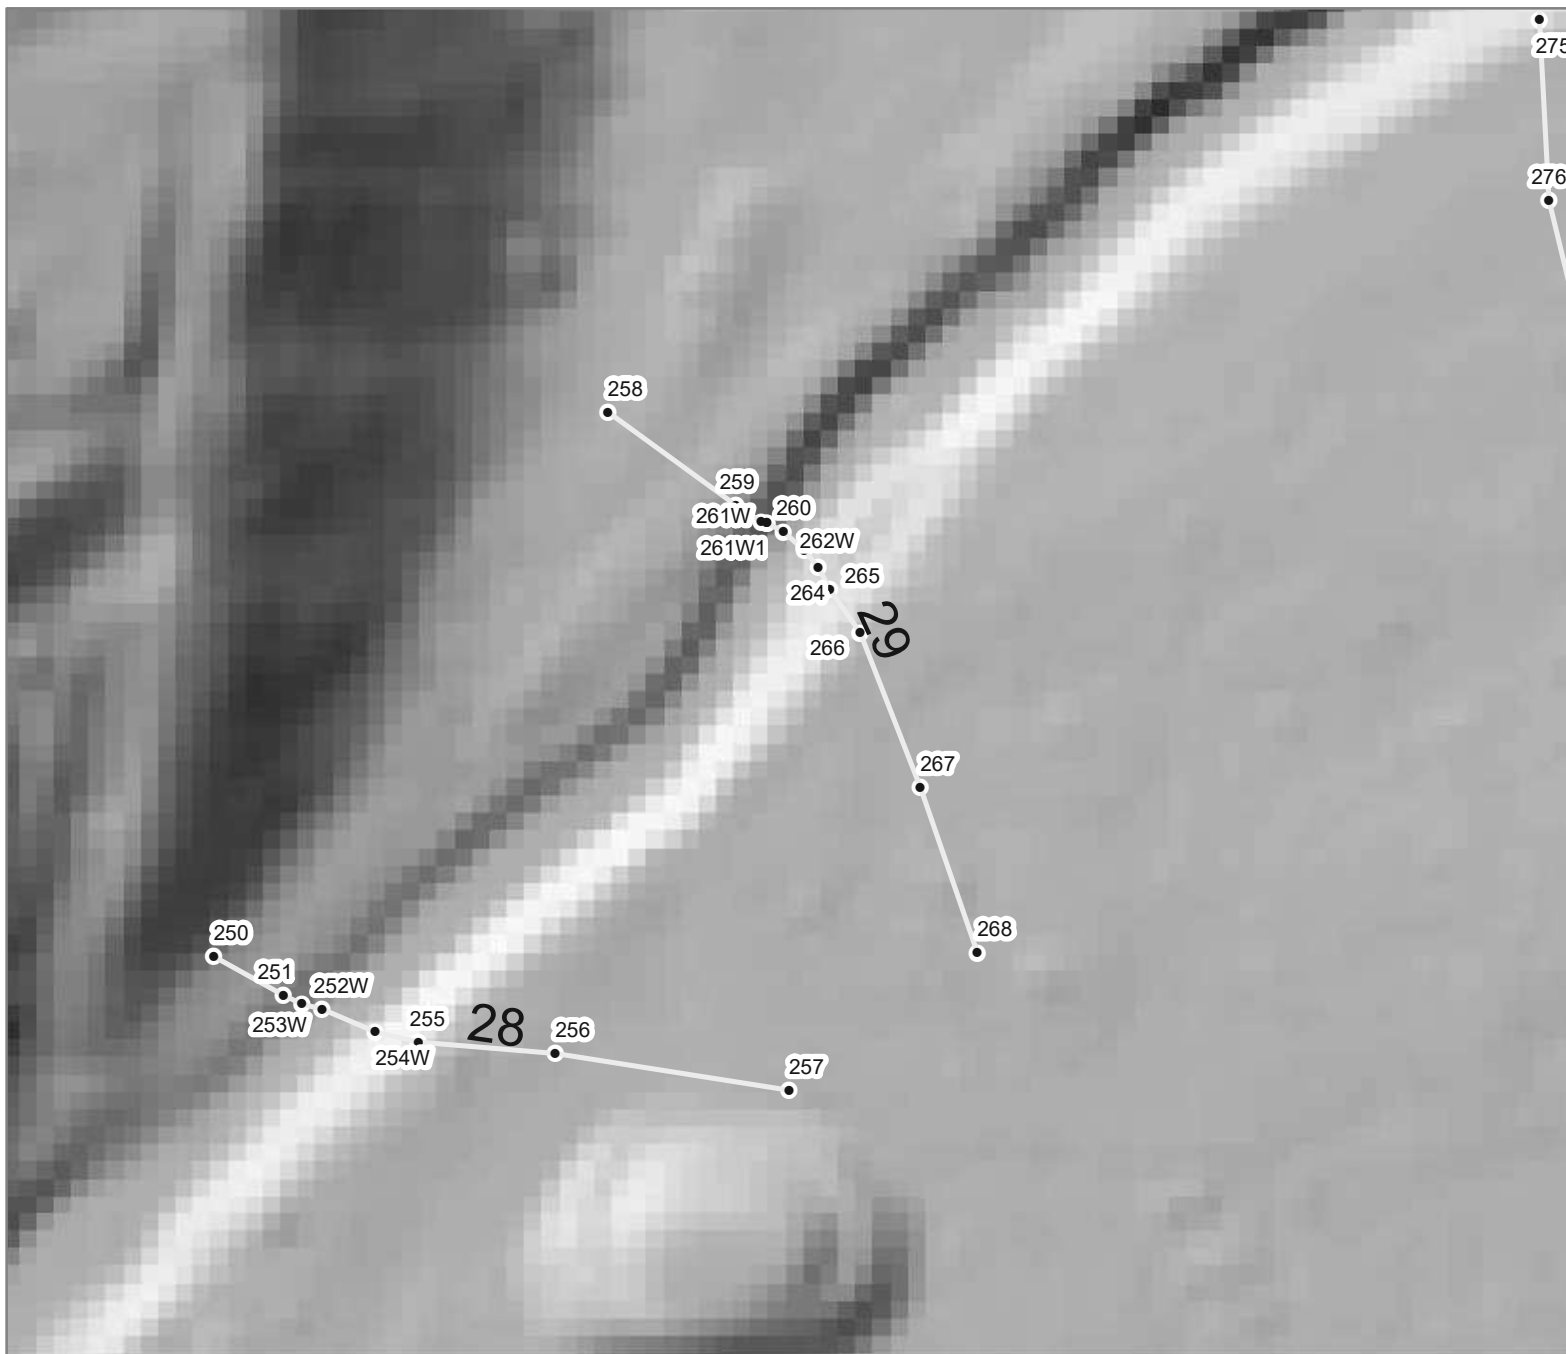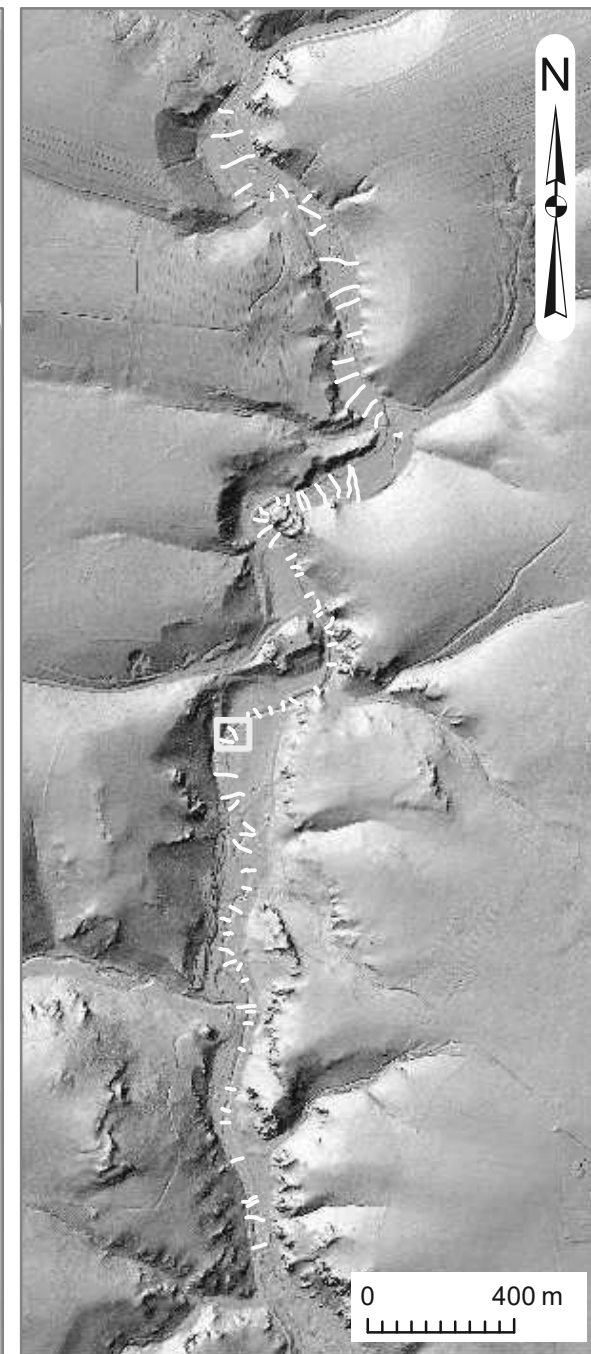

*Proile: 29* Analyses of the Prądnik riverbed shape based on archiva and contemporary data sets – old maps, LIDAR, DTMs and cross-sectional profile

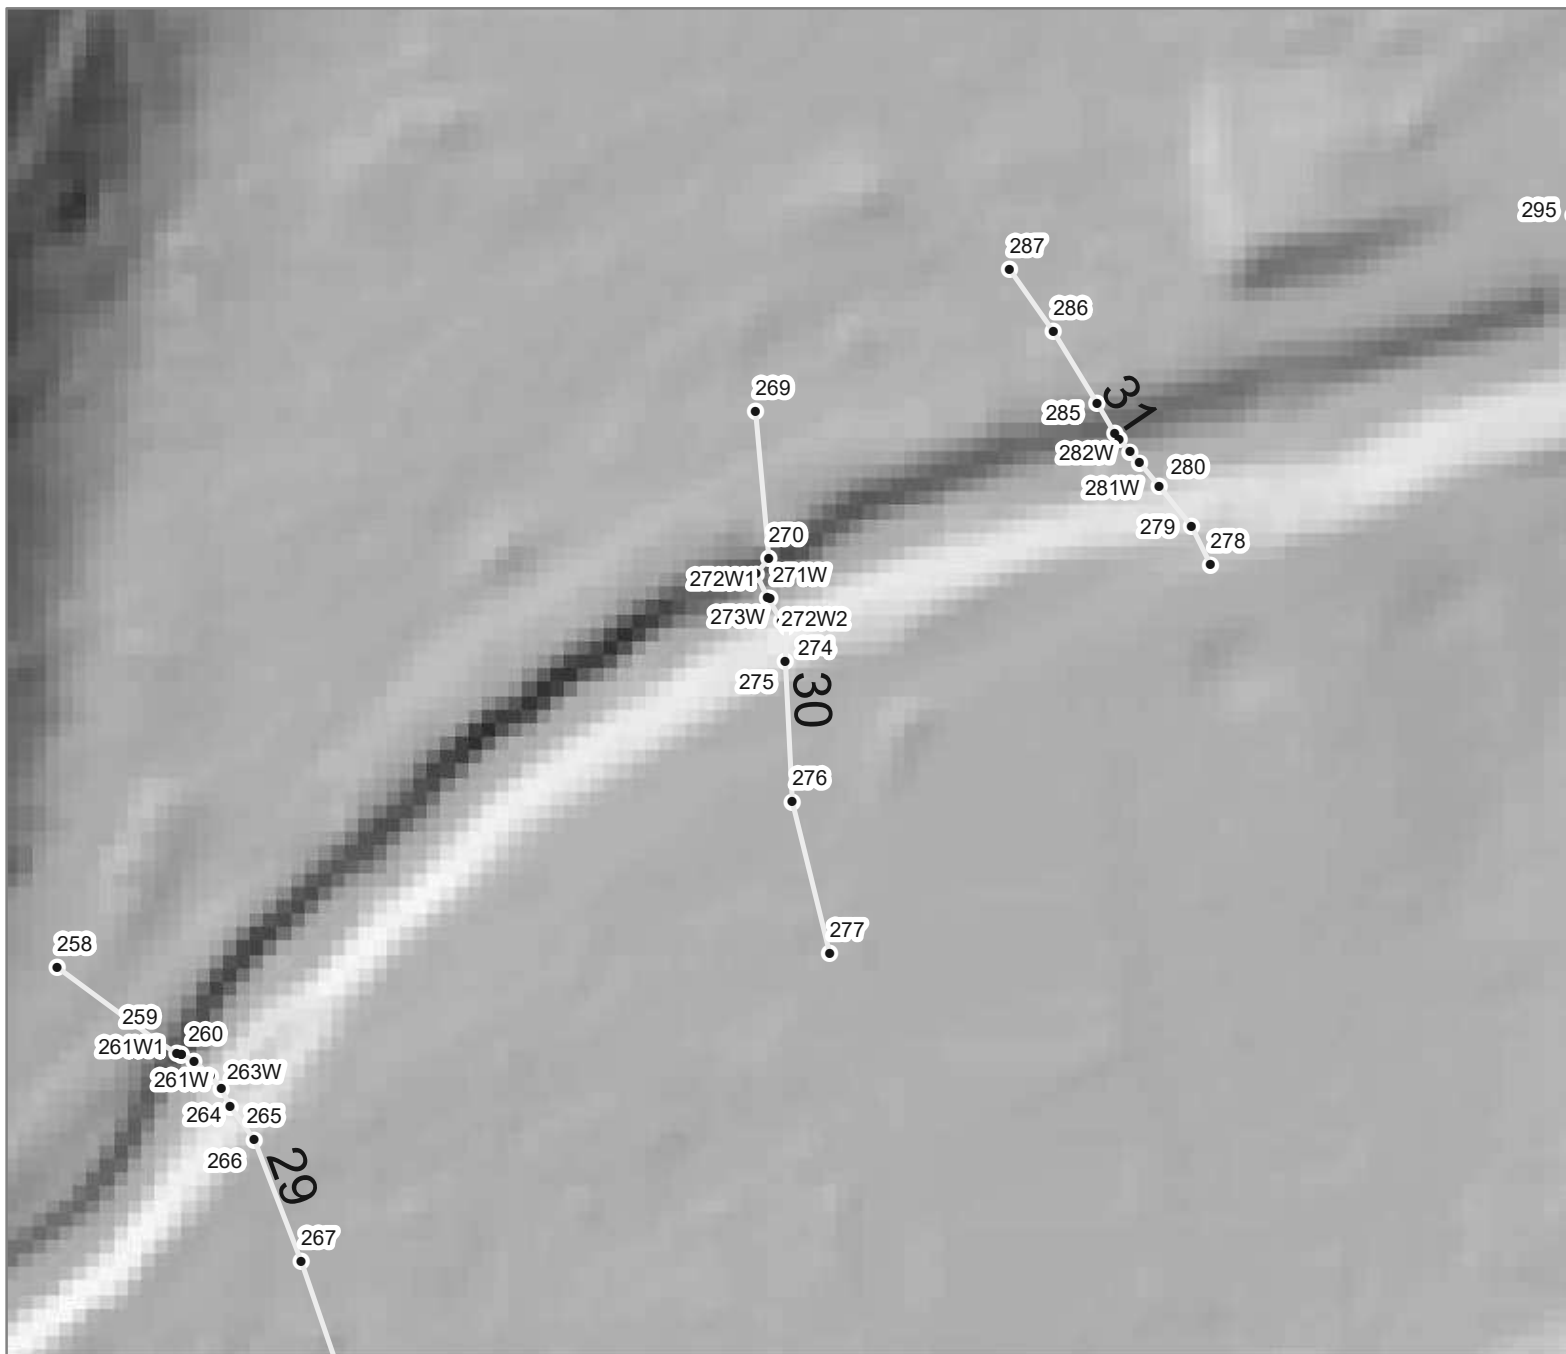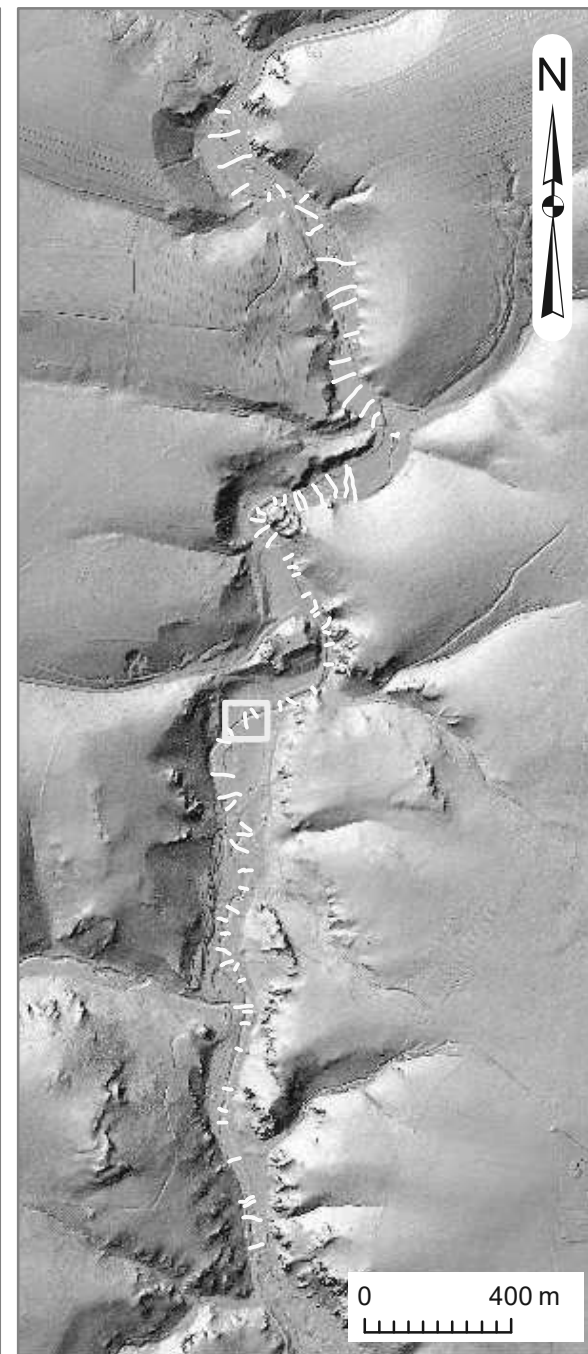

*Proile: 30* Analyses of the Prądnik riverbed shape based on archiva and contemporary data sets – old maps, LIDAR, DTMs and cross-sectional profile

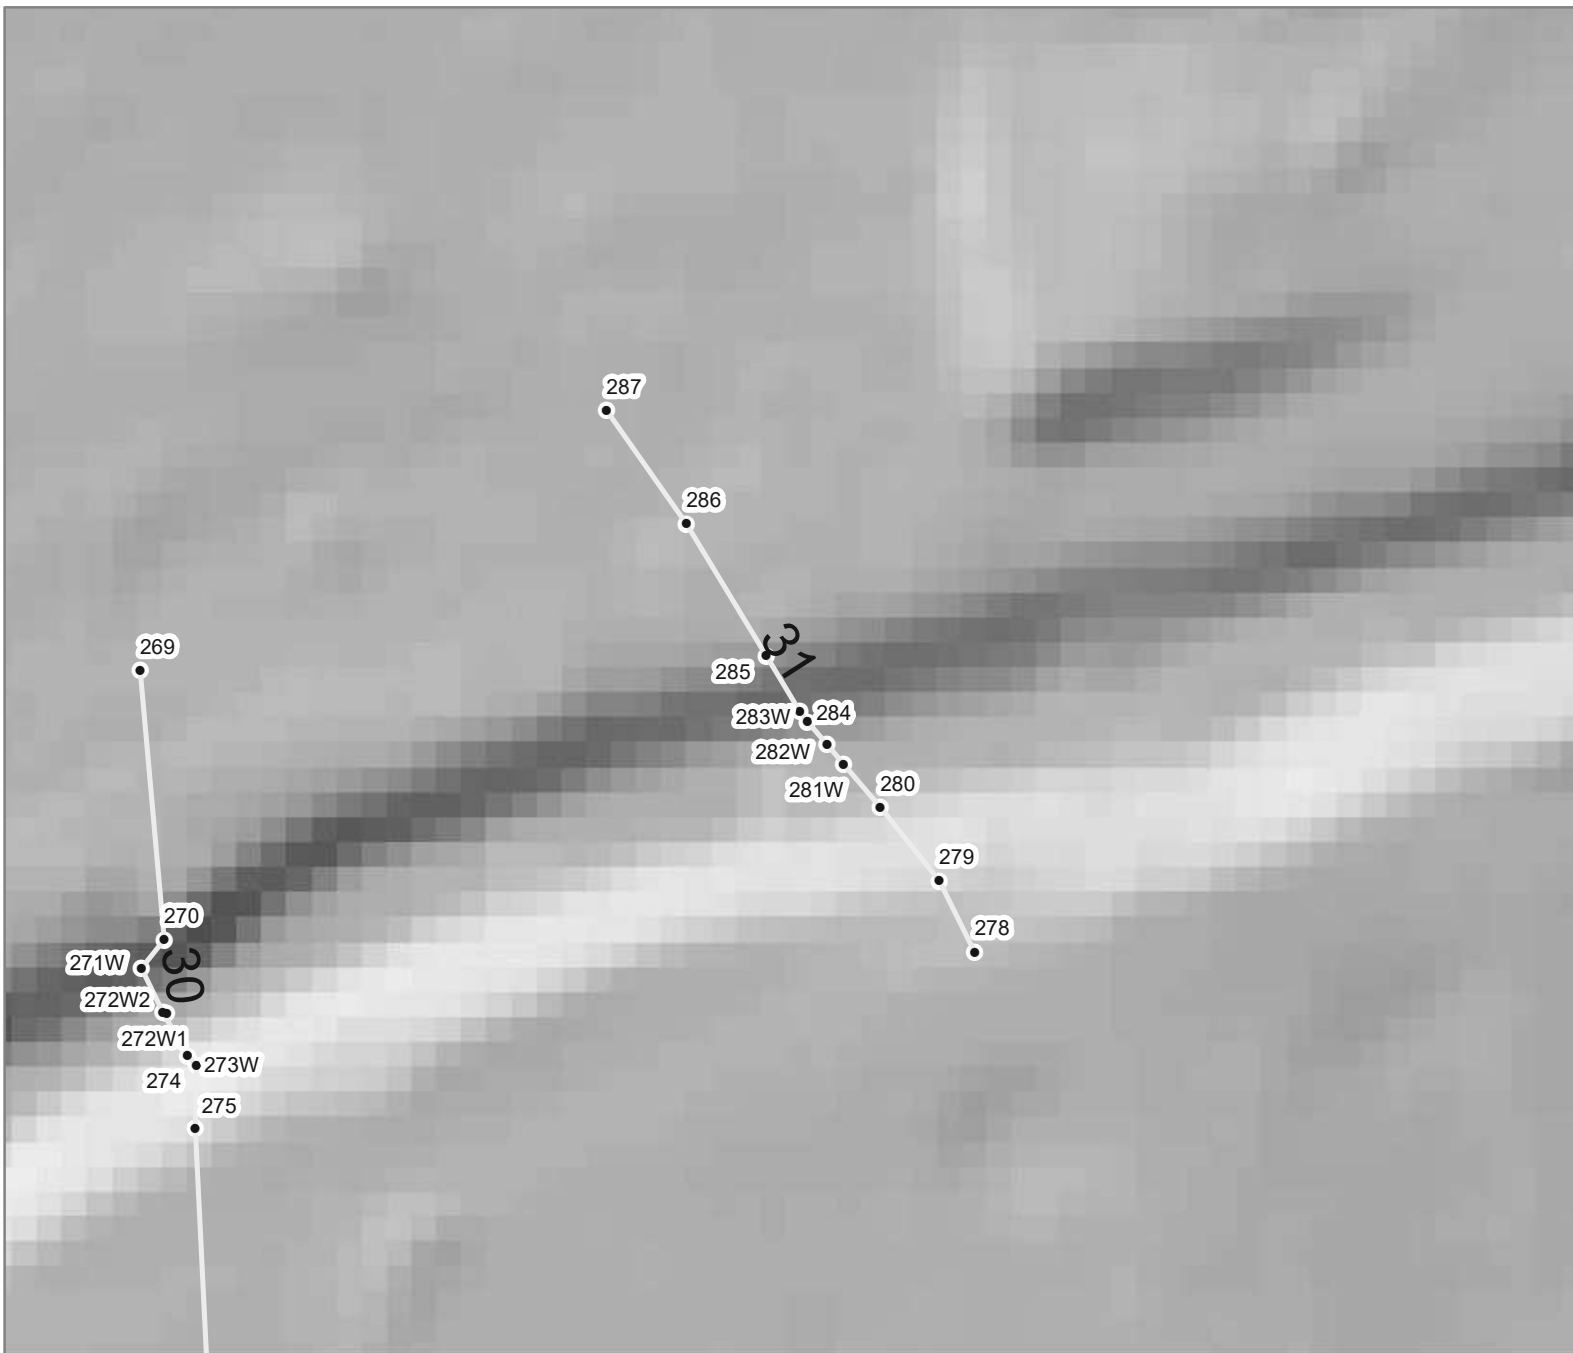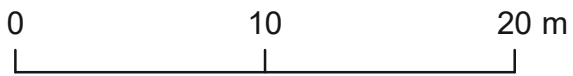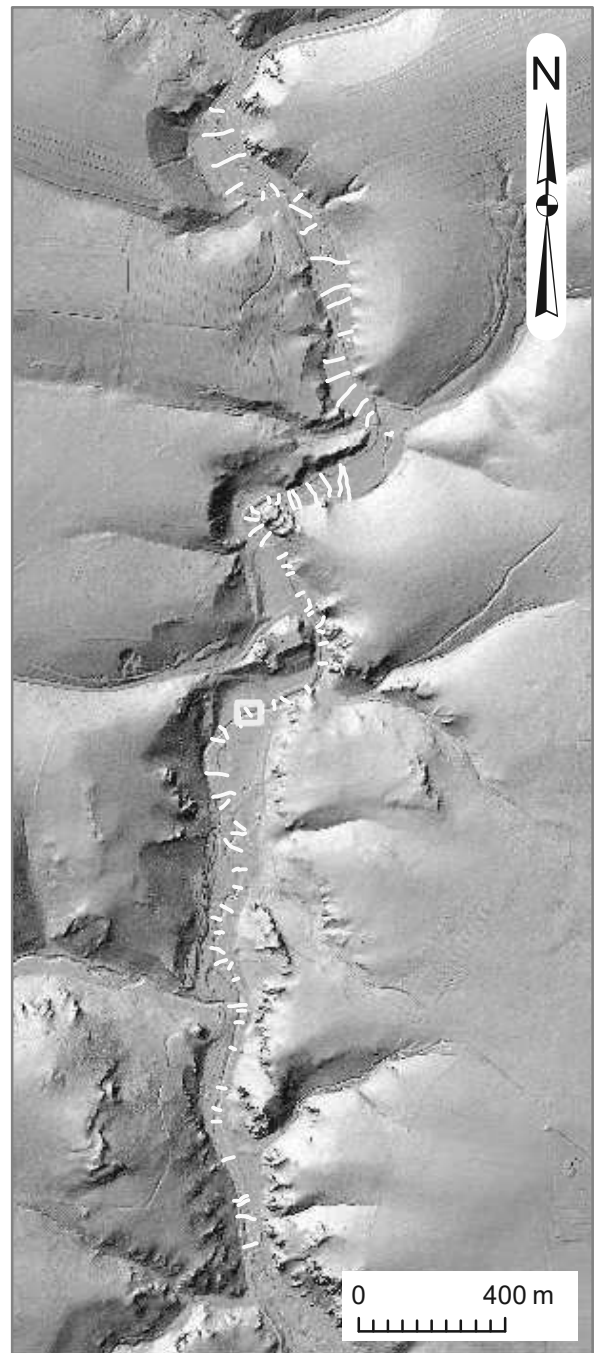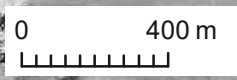

*Proile: 31* Analyses of the Prądnik riverbed shape based on archiva and contemporary data sets – old maps, LIDAR, DTMs and cross-sectional profile

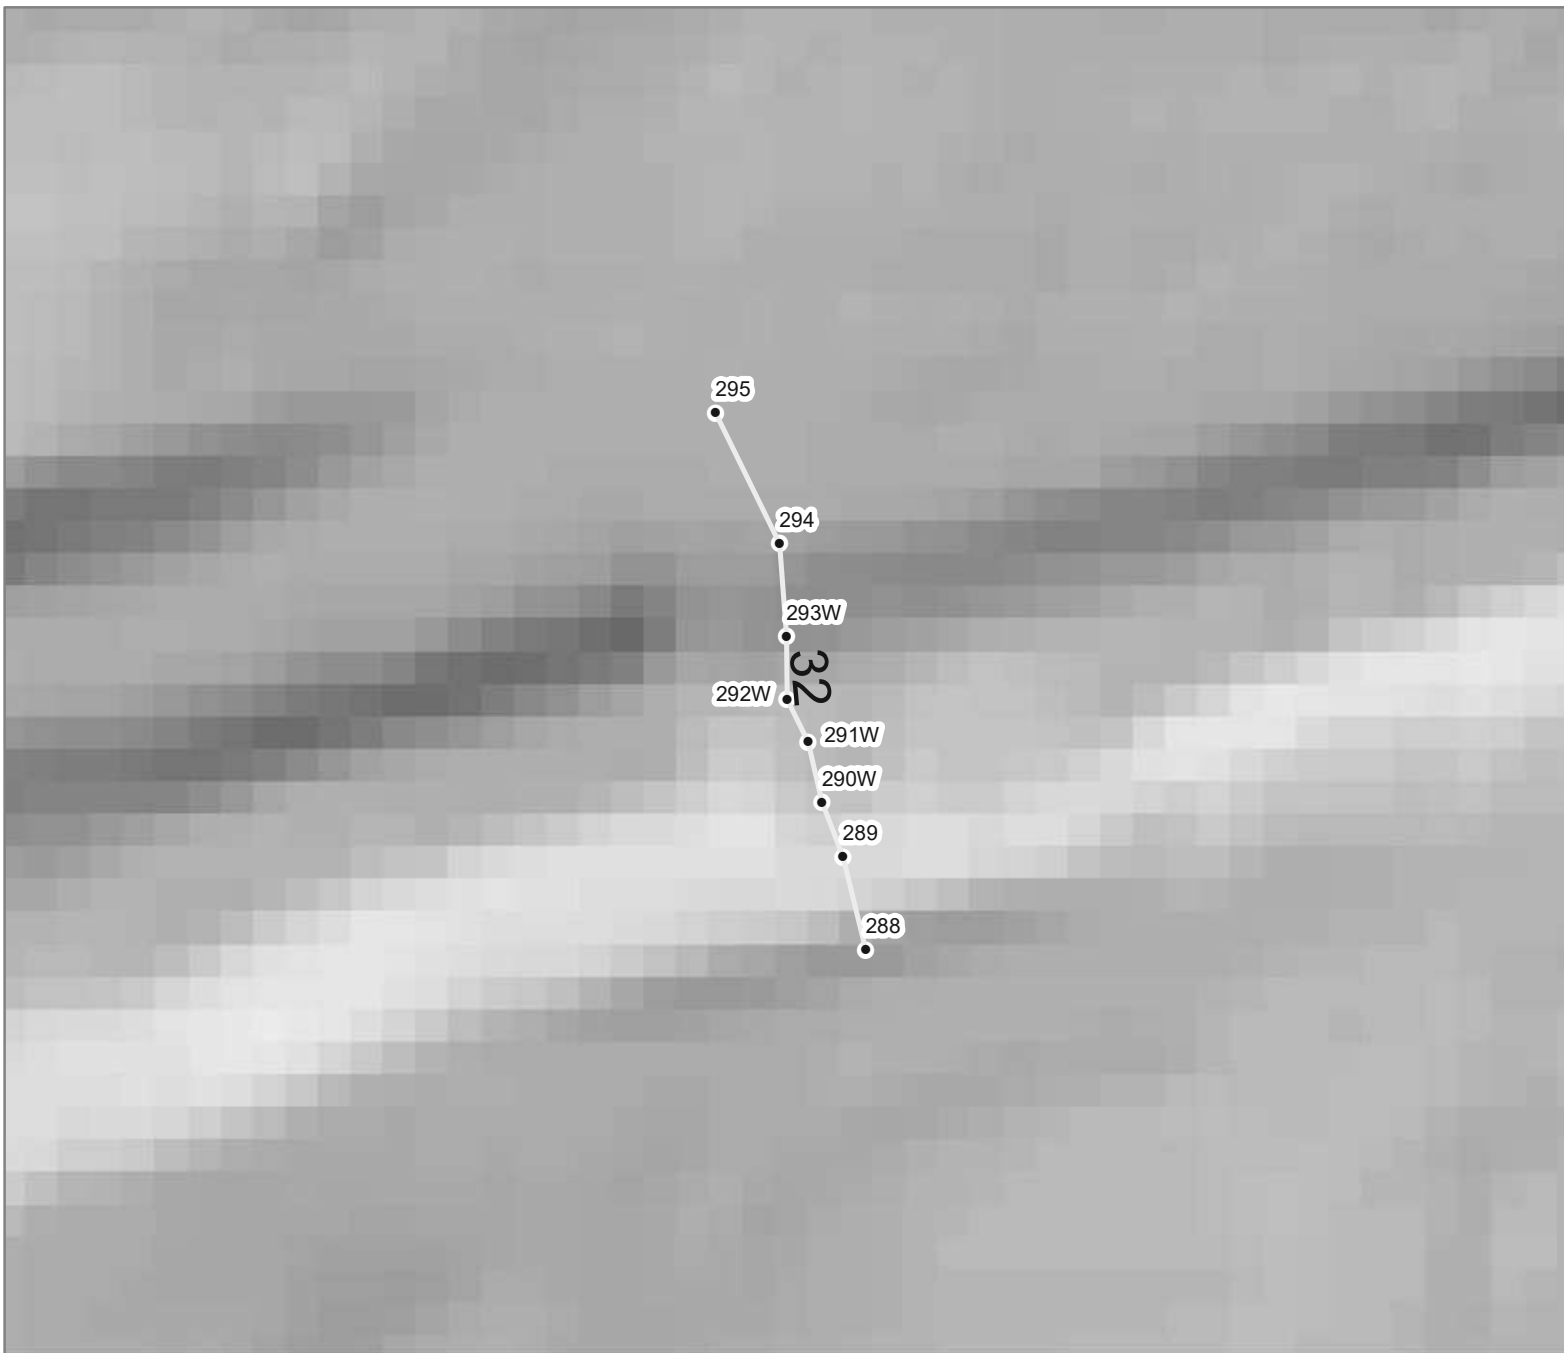

0 10 20 m

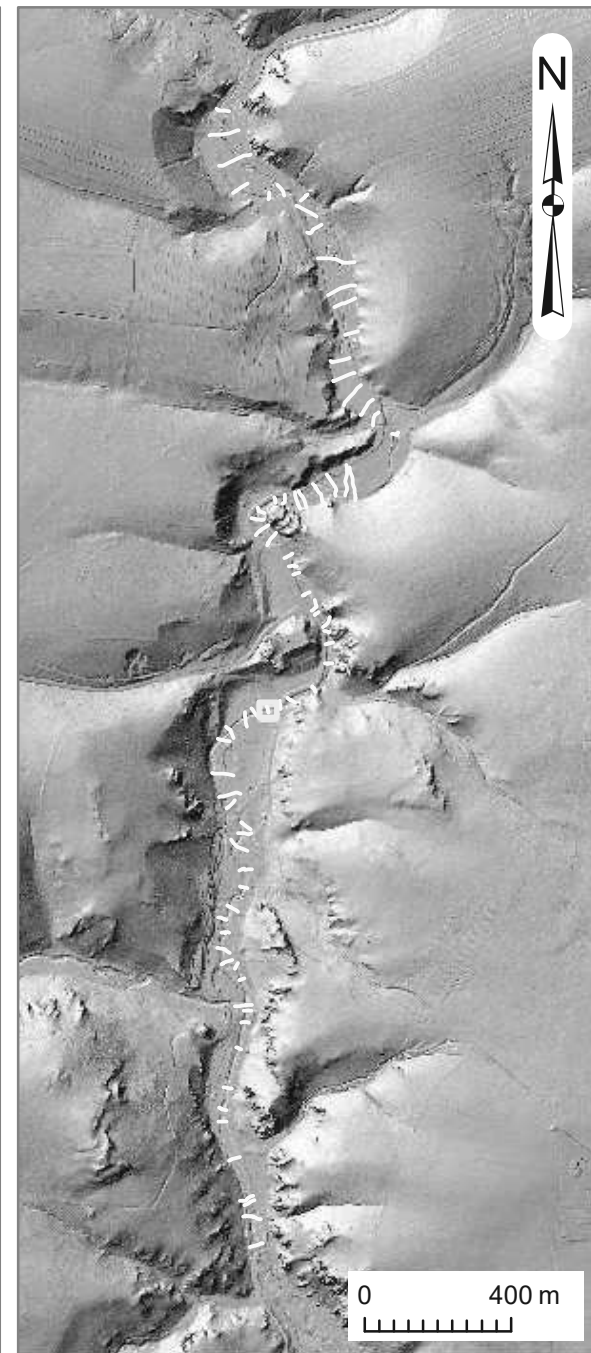

*Proile: 32* Analyses of the Prądnik riverbed shape based on archiva and contemporary data sets – old maps, LIDAR, DTMs and cross-sectional profile



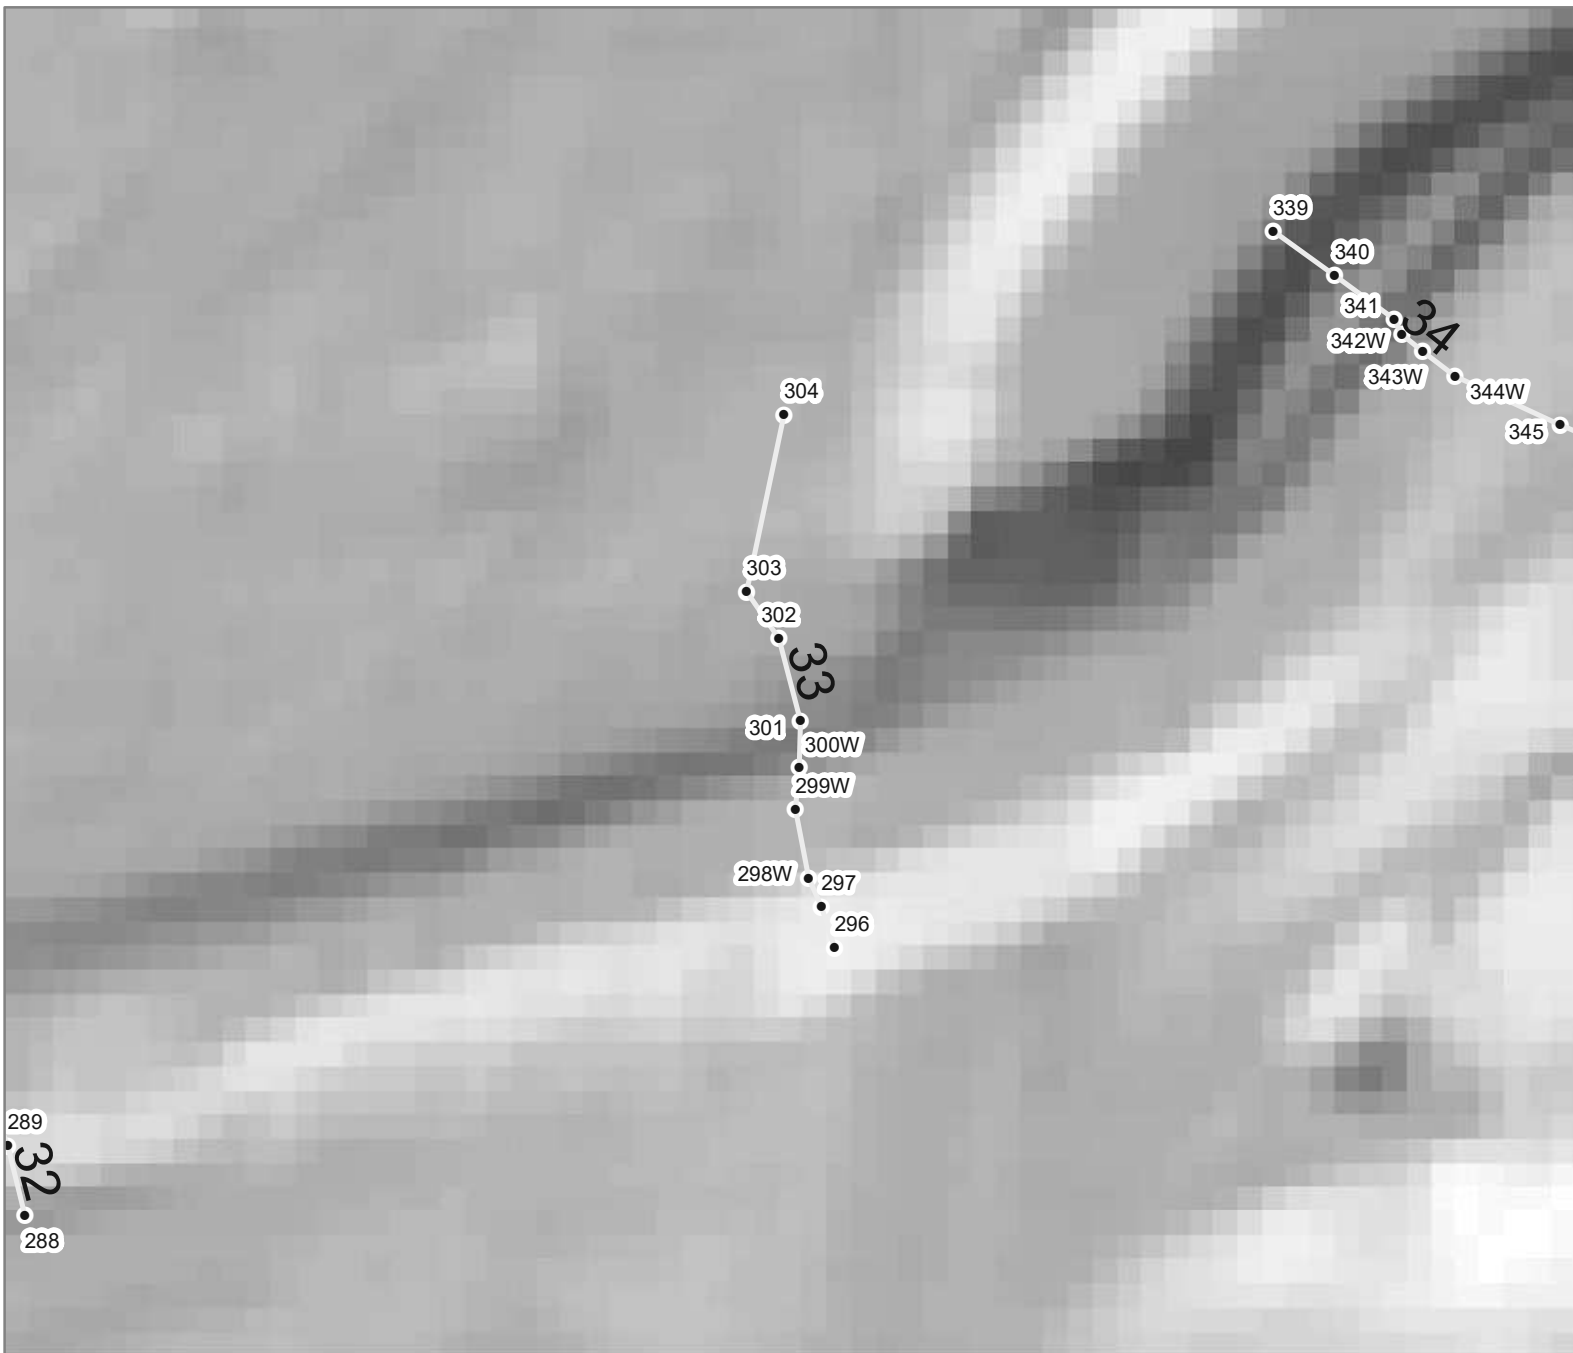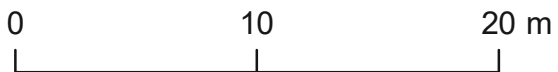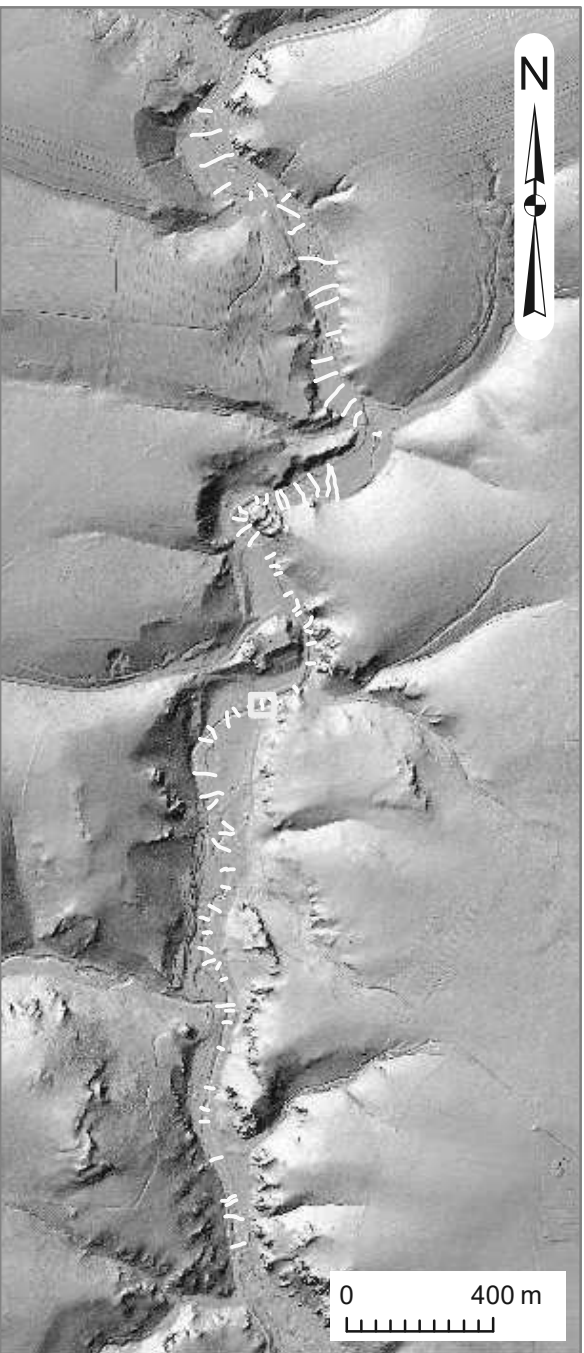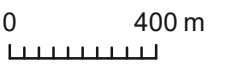

*Proile: 33* Analyses of the Prądnik riverbed shape based on archiva and contemporary data sets – old maps, LIDAR, DTMs and cross-sectional profile

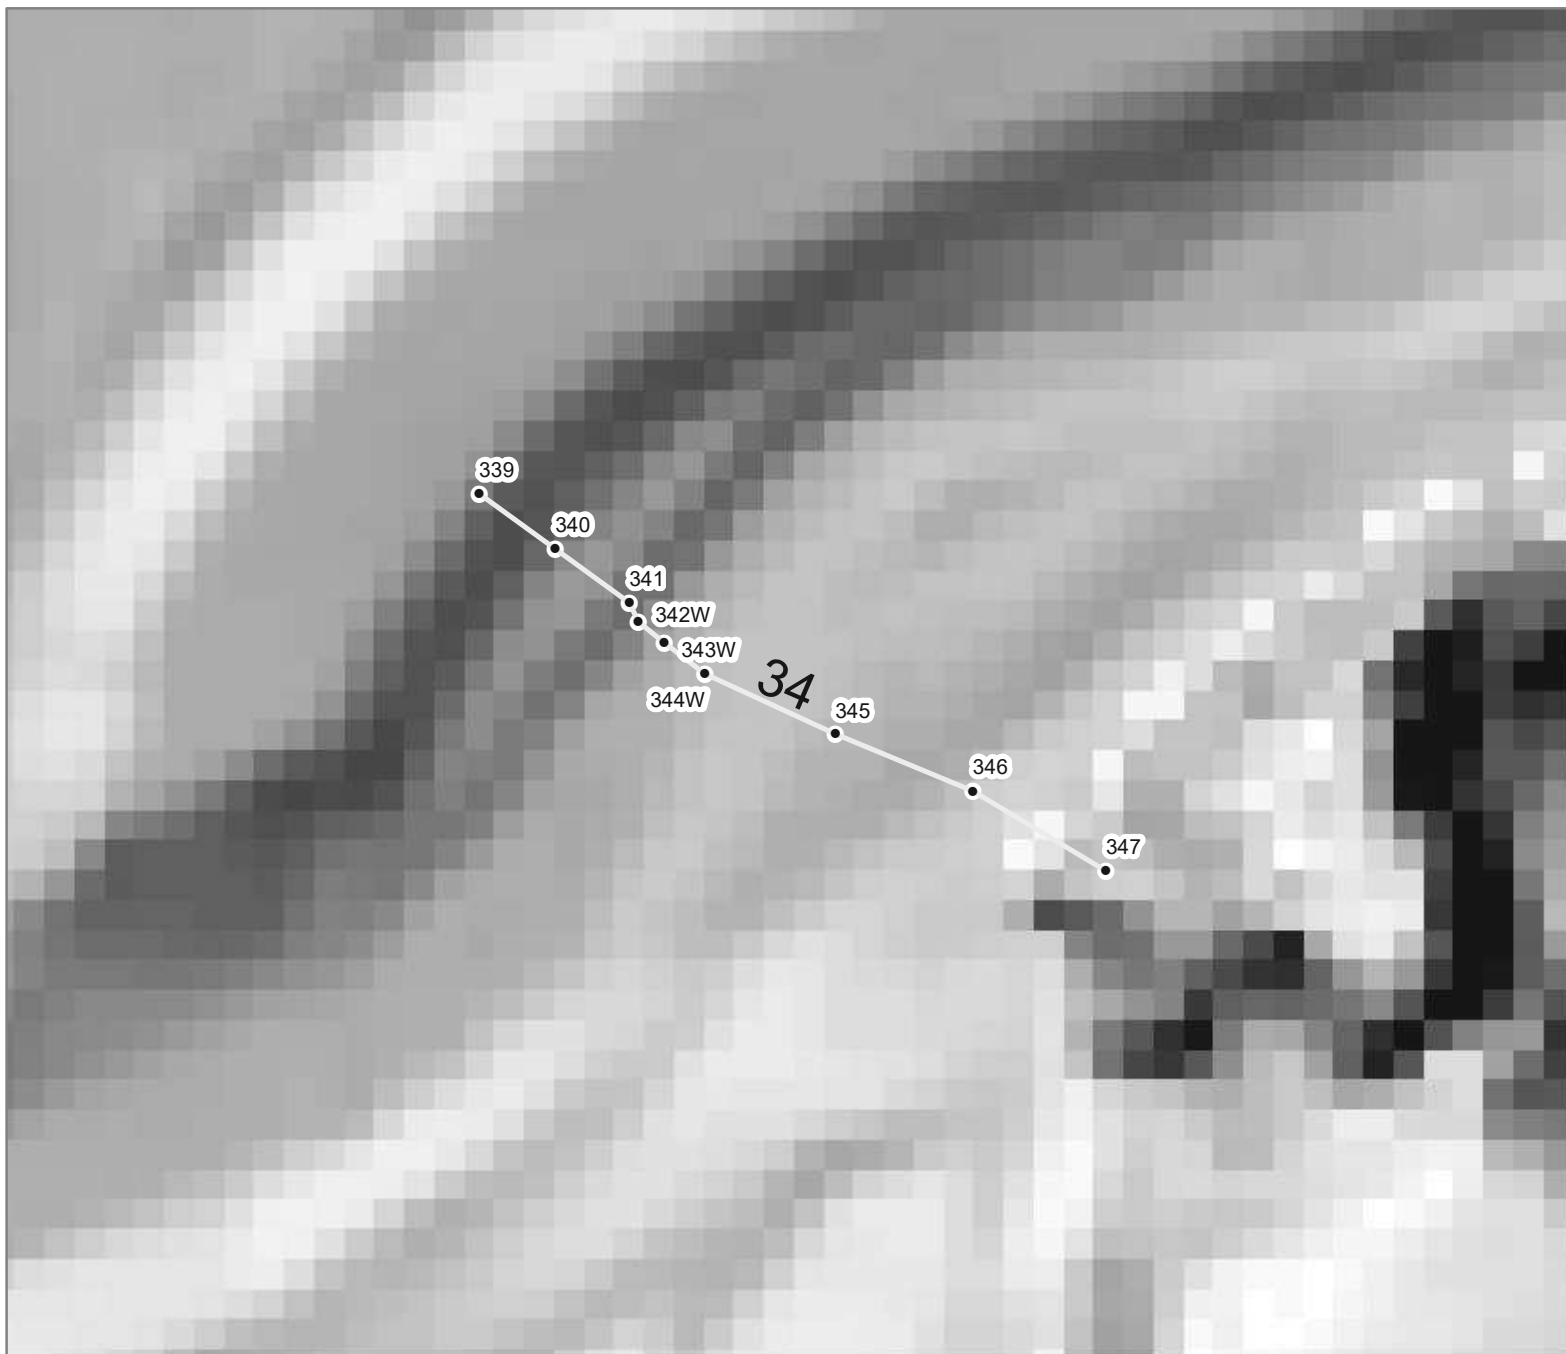

0 10 20 m

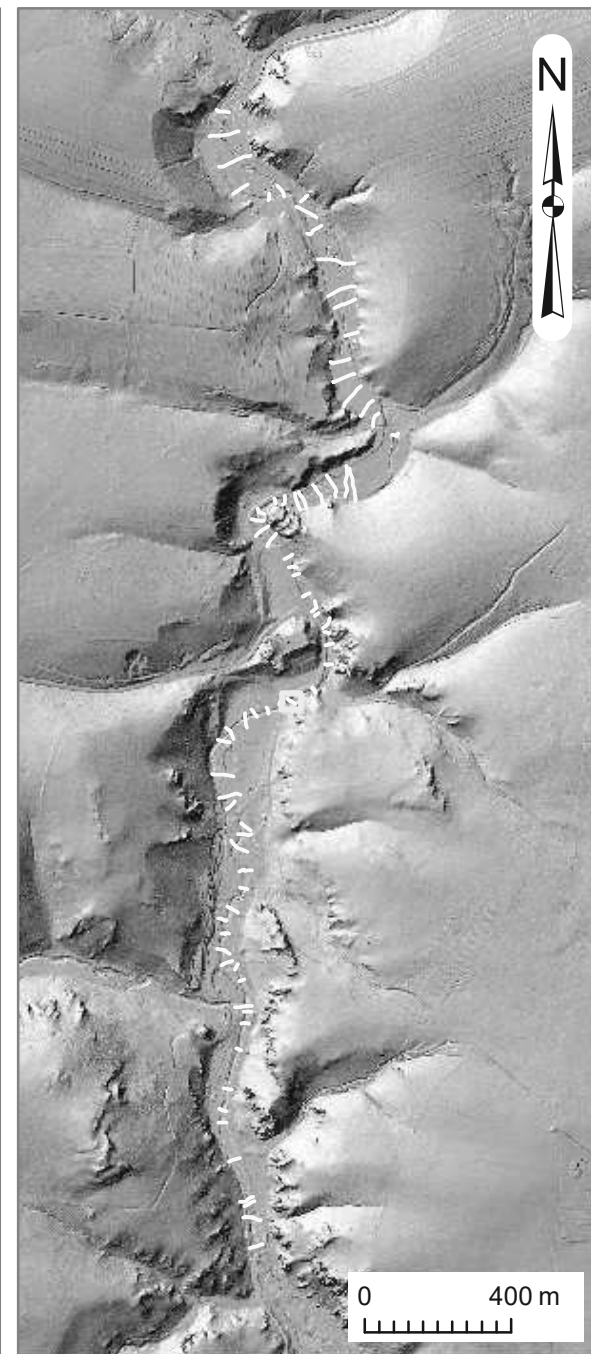

*Proile: 34* Analyses of the Prądnik riverbed shape based on archiva and contemporary data sets – old maps, LIDAR, DTMs and cross-sectional profile

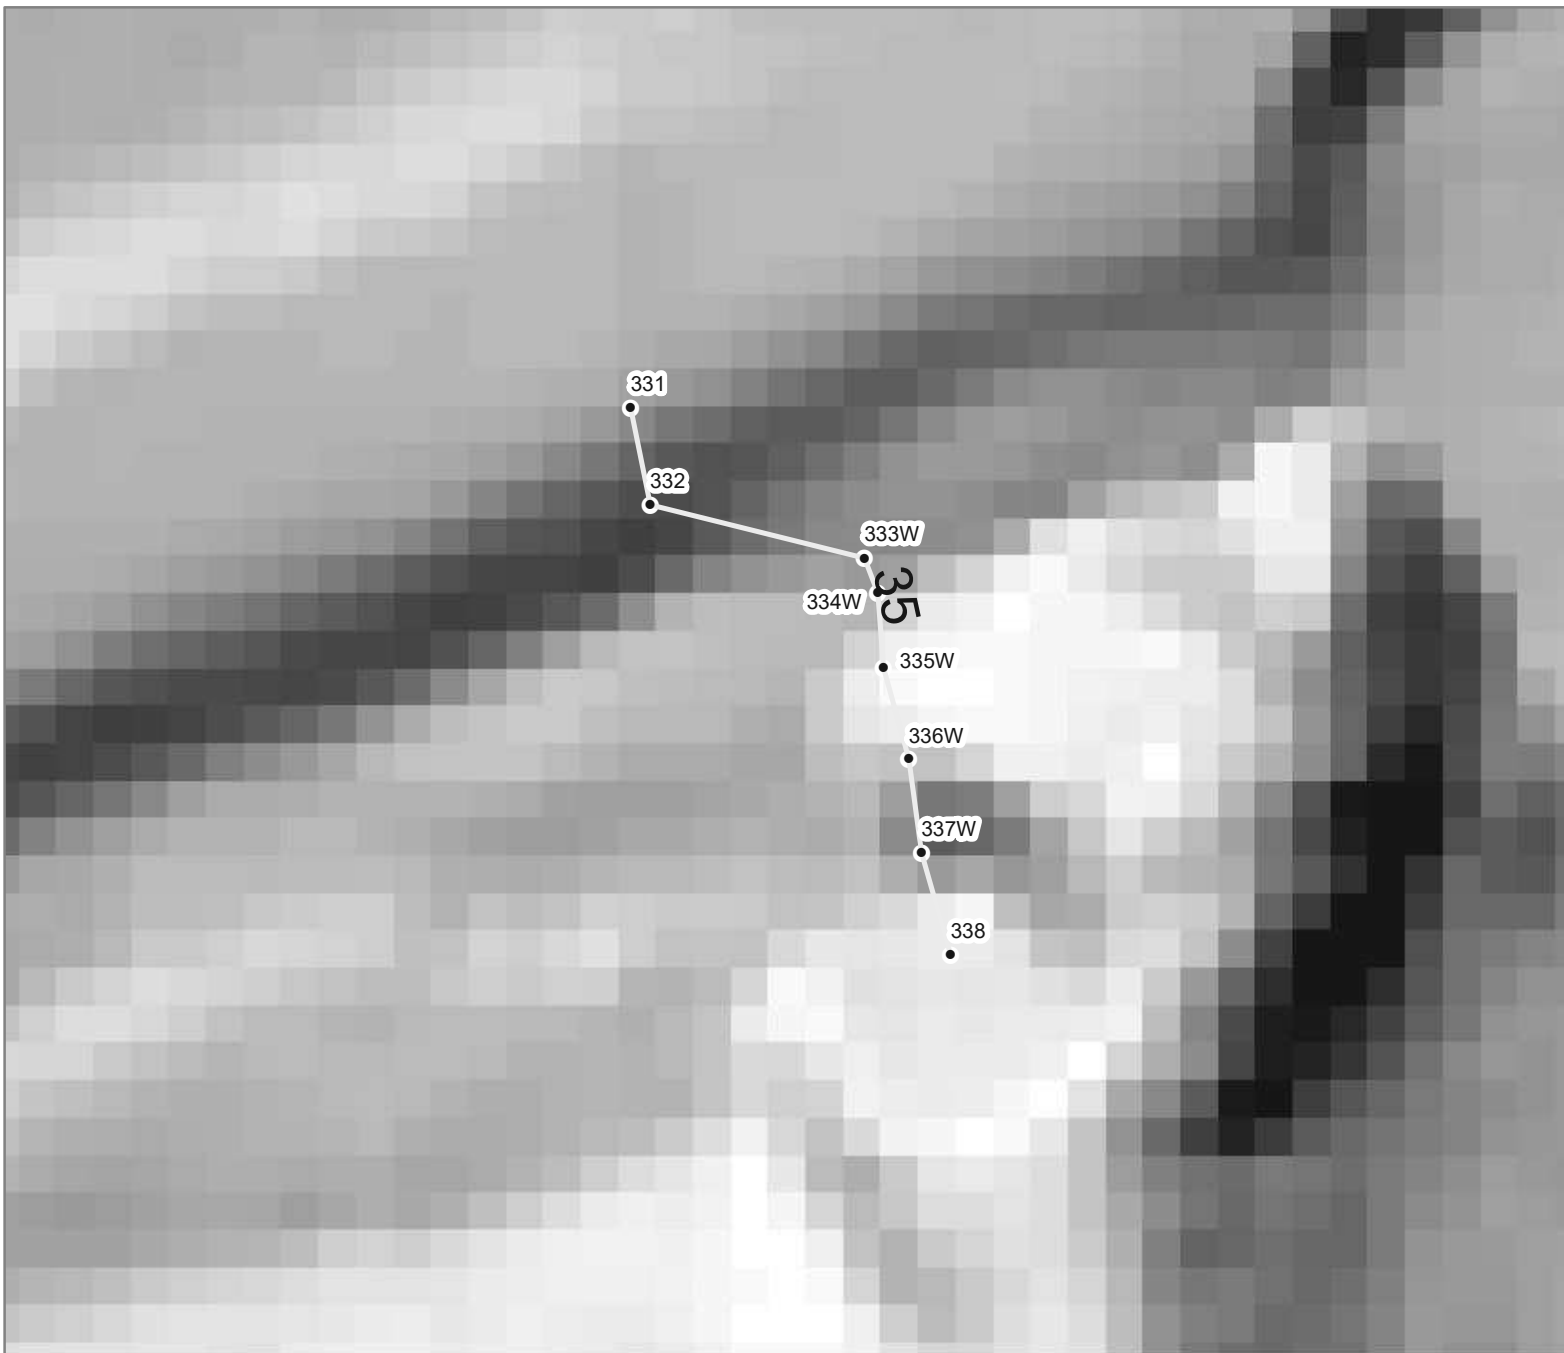

0 10 20 m

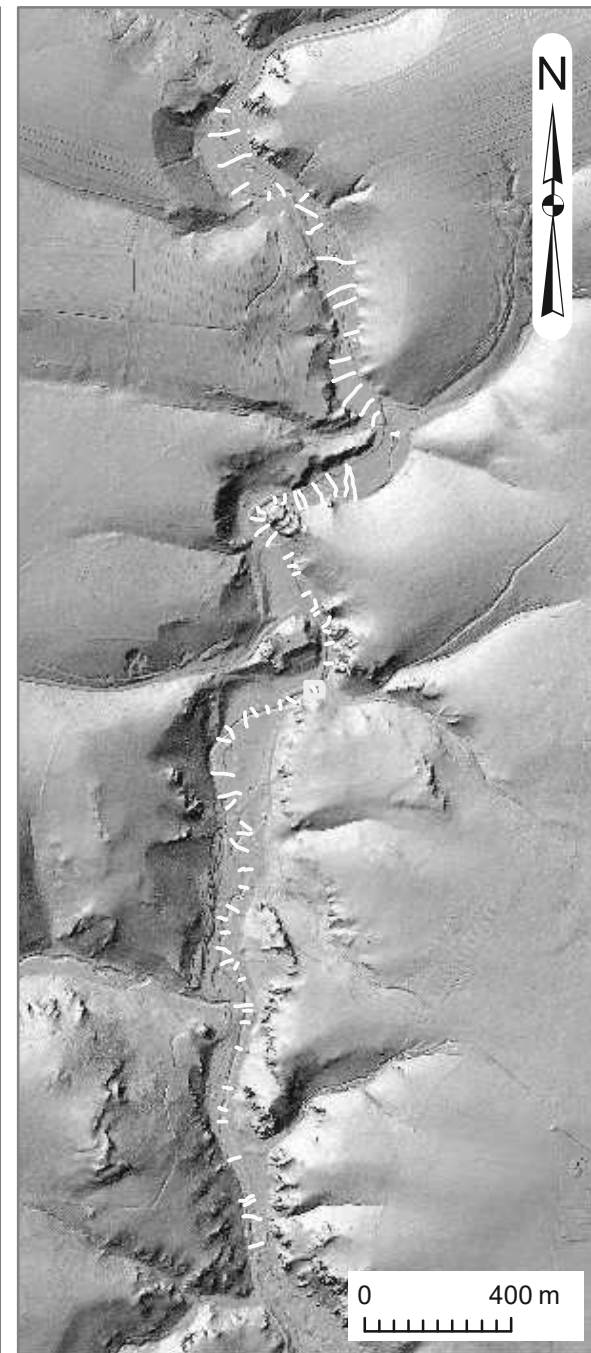

*Proile: 35* Analyses of the Prądnik riverbed shape based on archiva and contemporary data sets – old maps, LIDAR, DTMs and cross-sectional profile

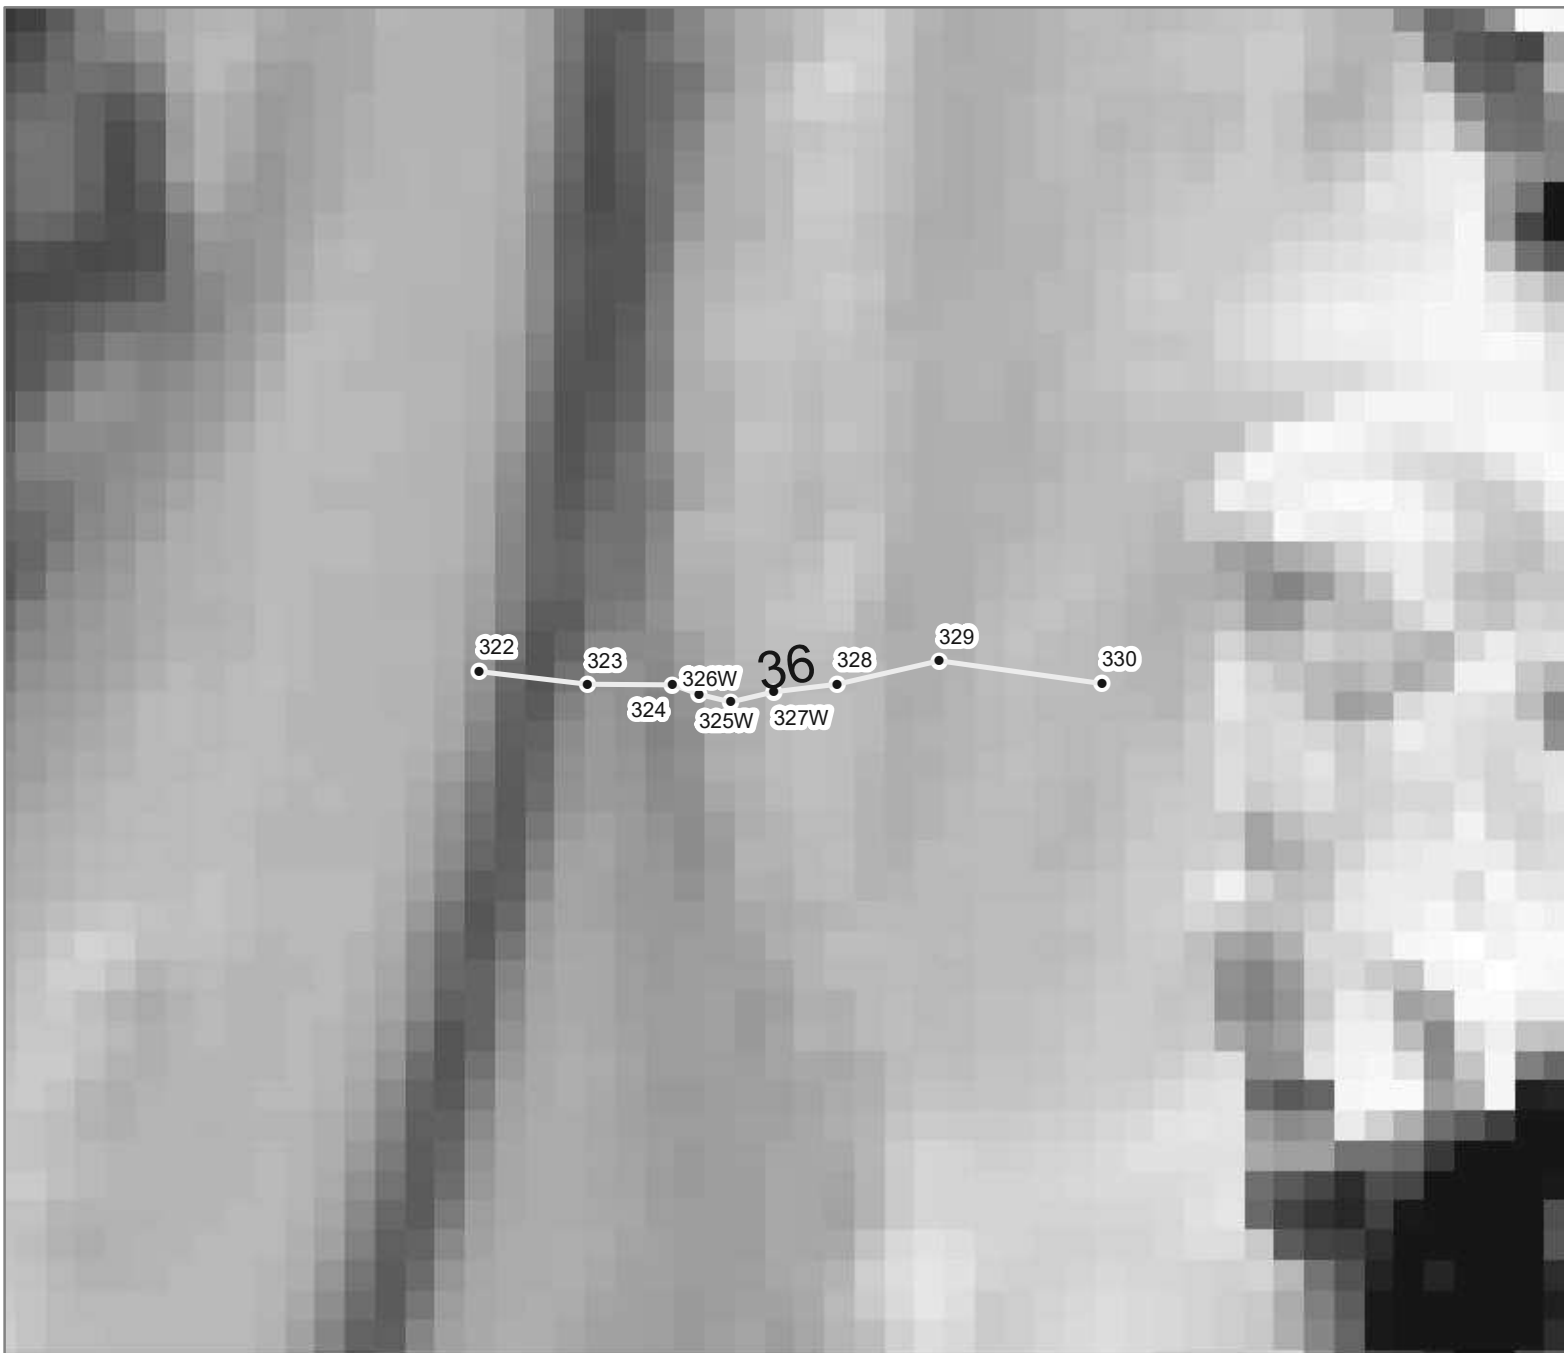

0 10 20 m

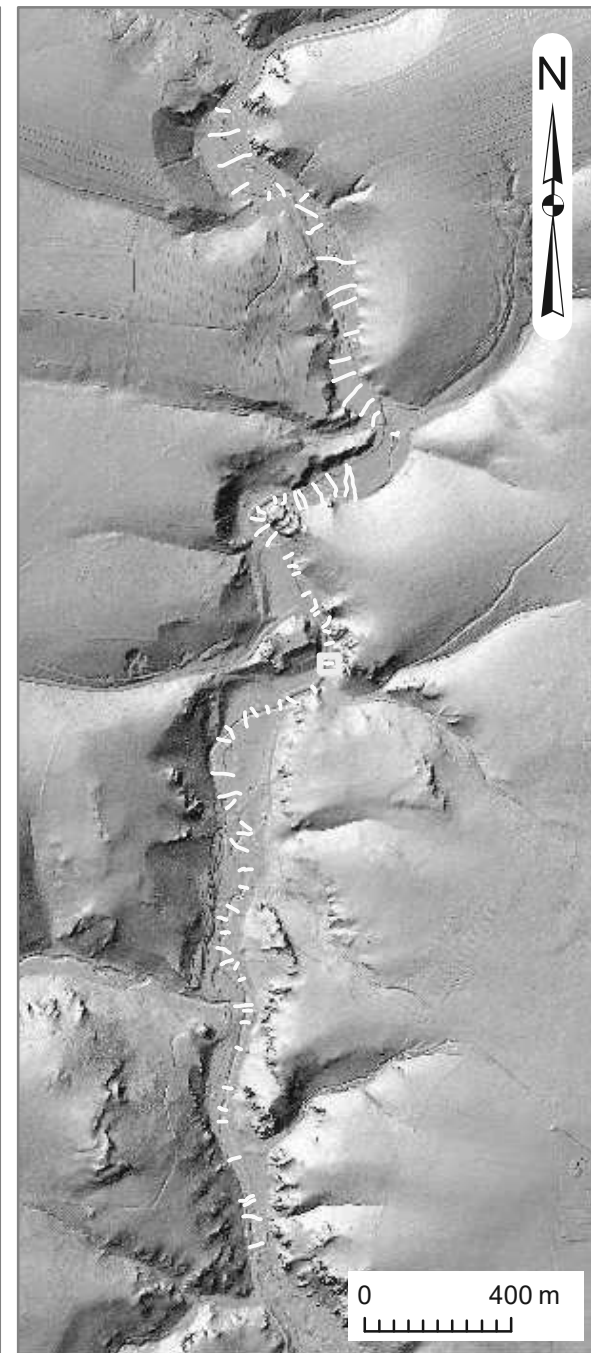

*Proile: 36* Analyses of the Prądnik riverbed shape based on archiva and contemporary data sets – old maps, LIDAR, DTMs and cross-sectional profile

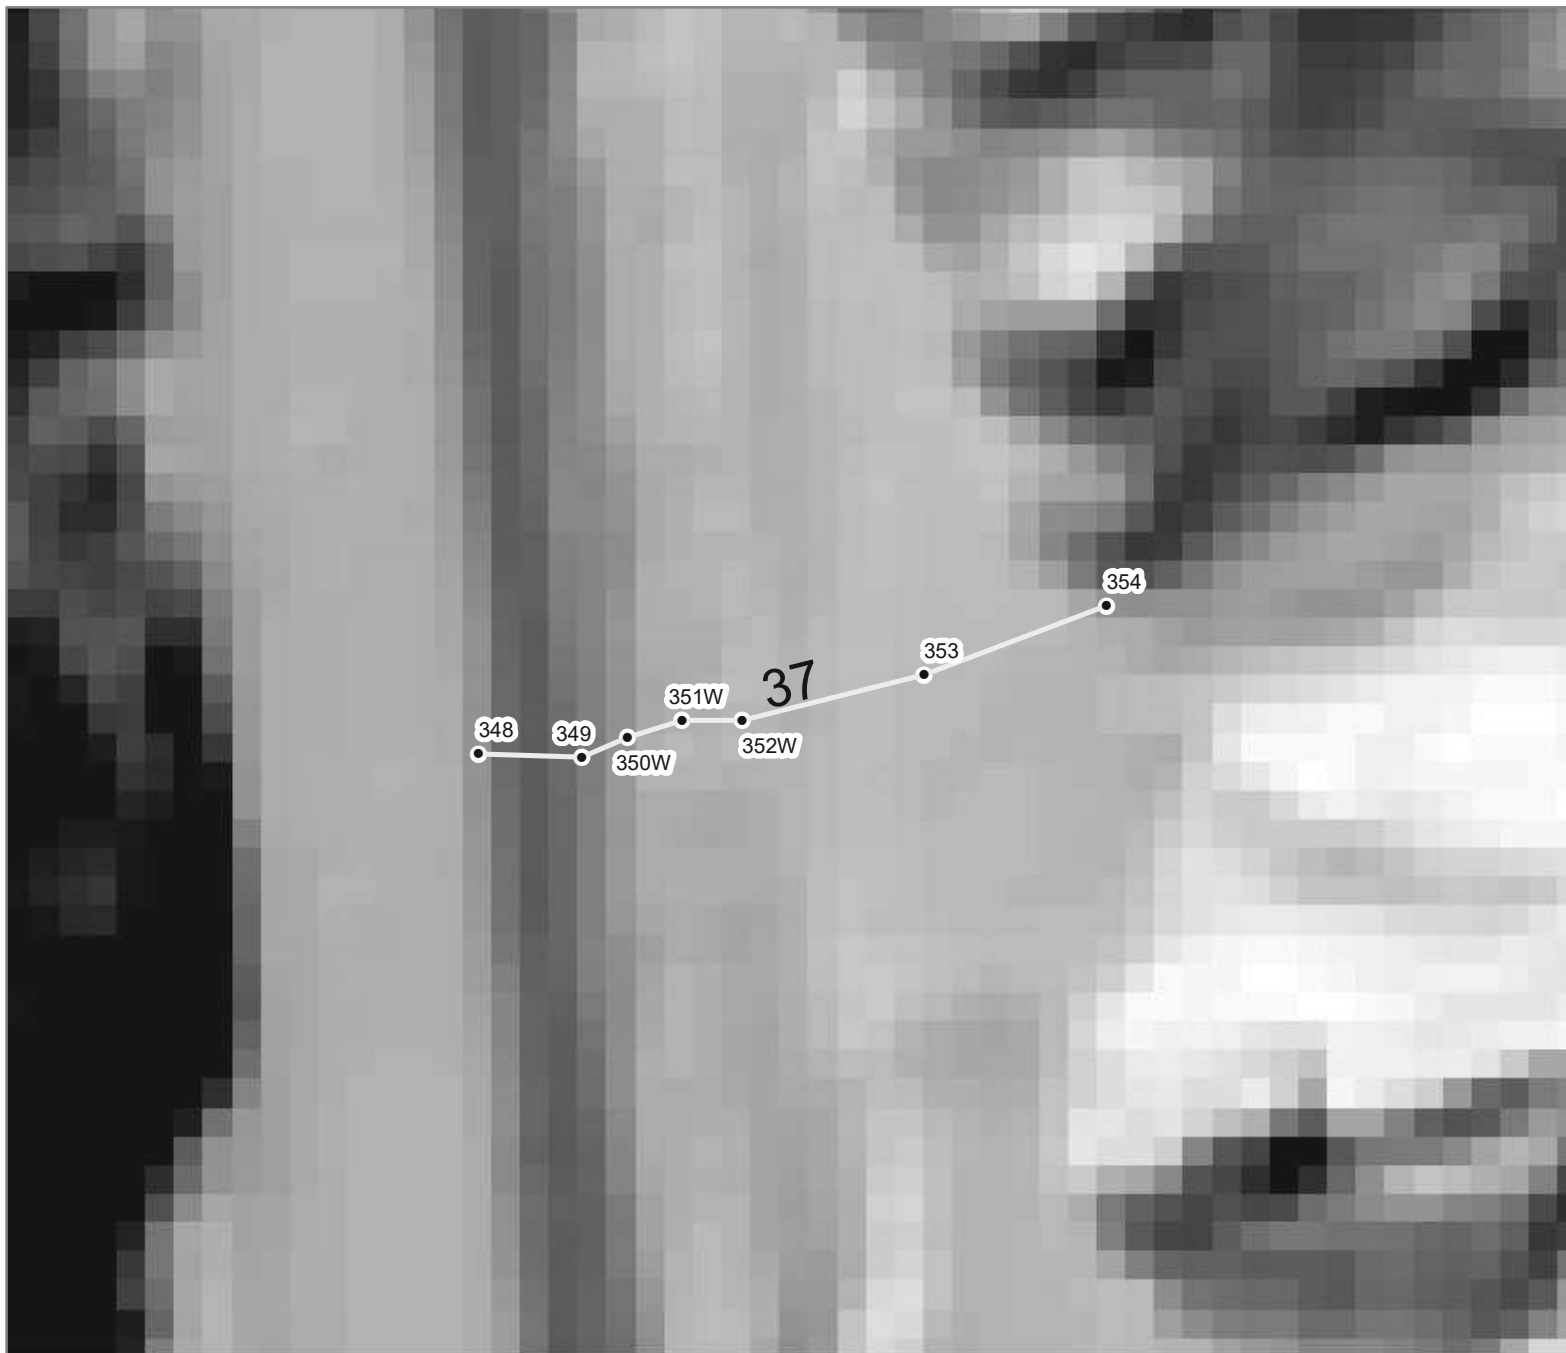

0 10 20 m

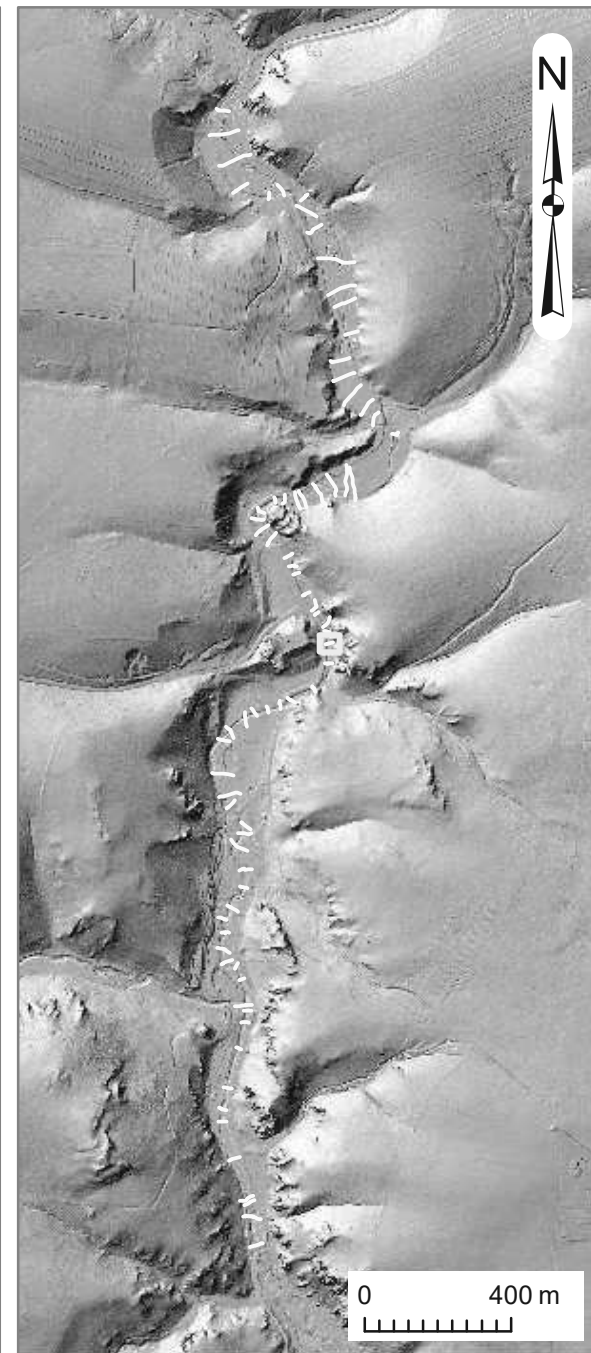

*Proile: 37* Analyses of the Prądnik riverbed shape based on archiva and contemporary data sets – old maps, LIDAR, DTMs and cross-sectional profile

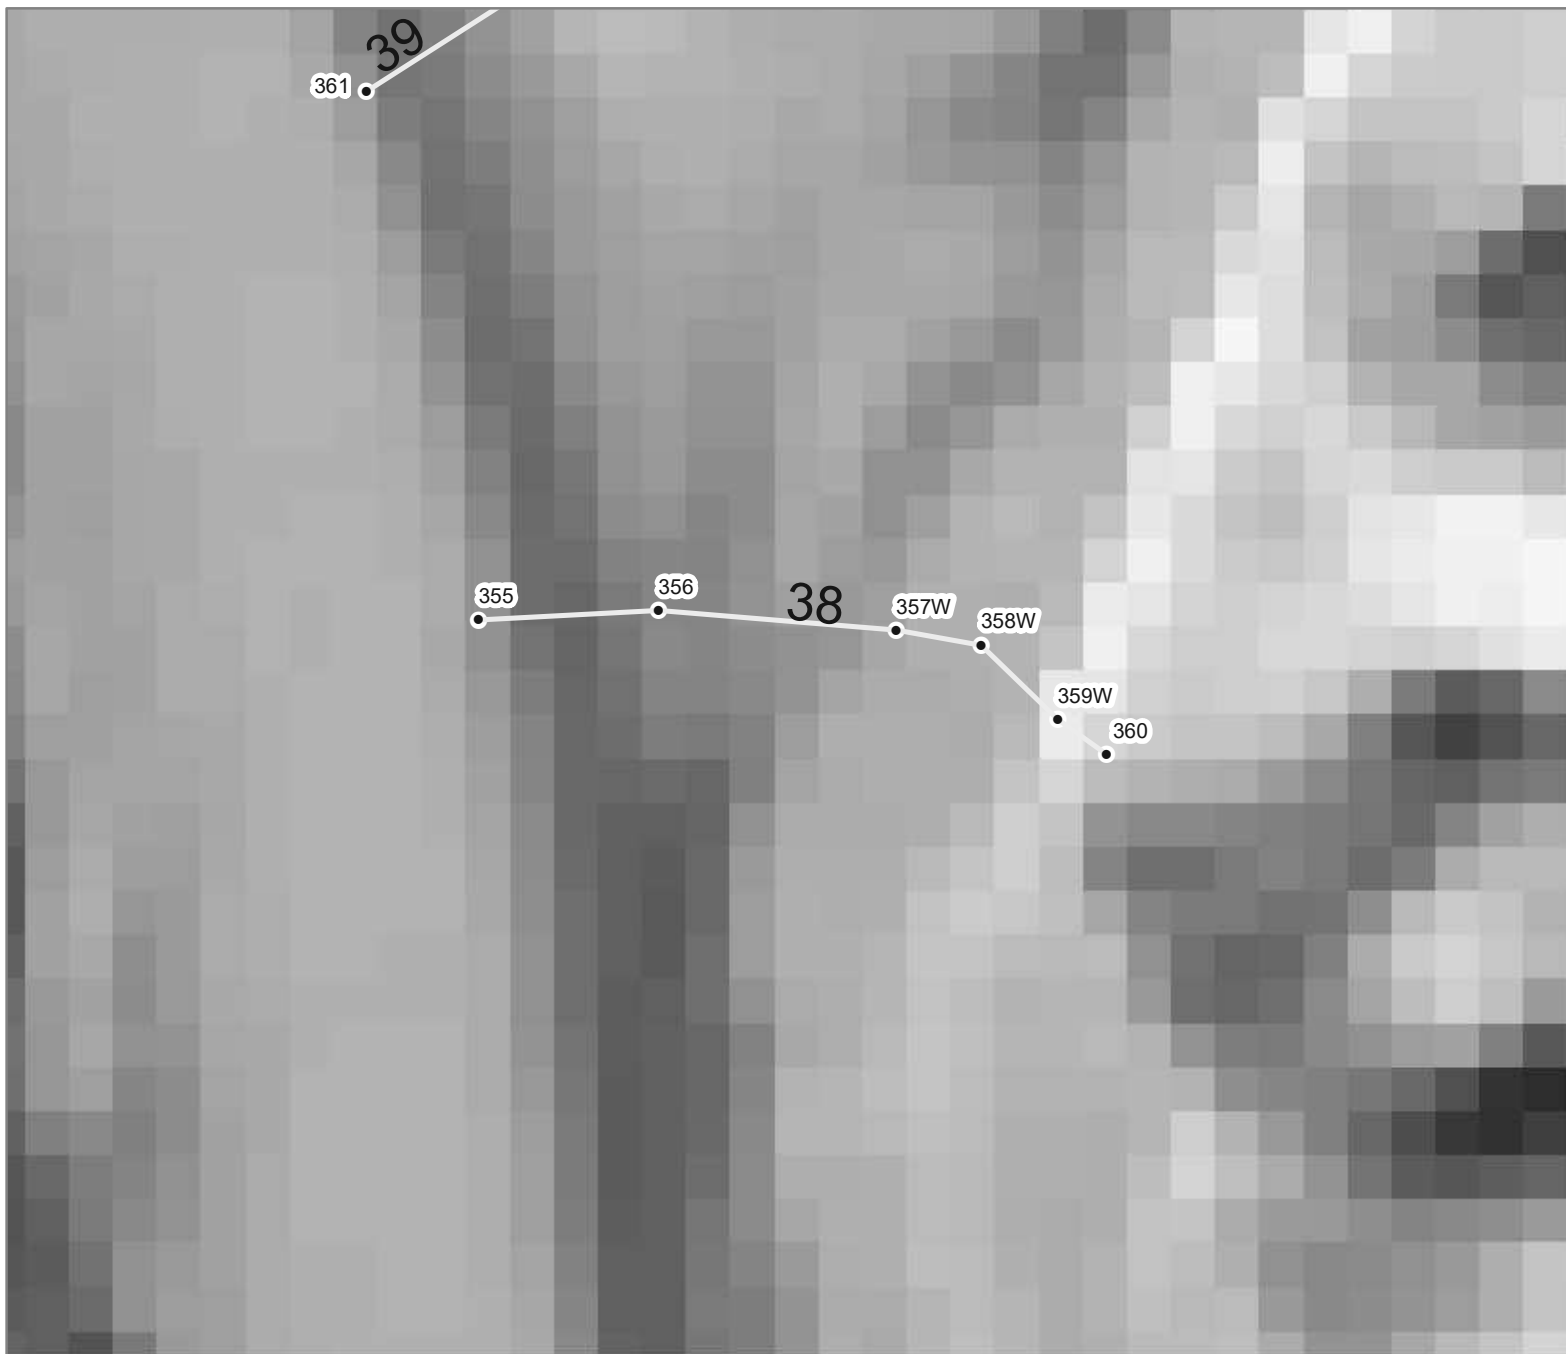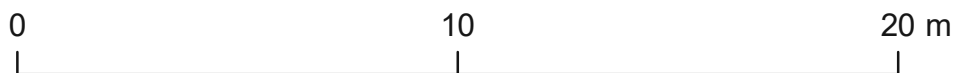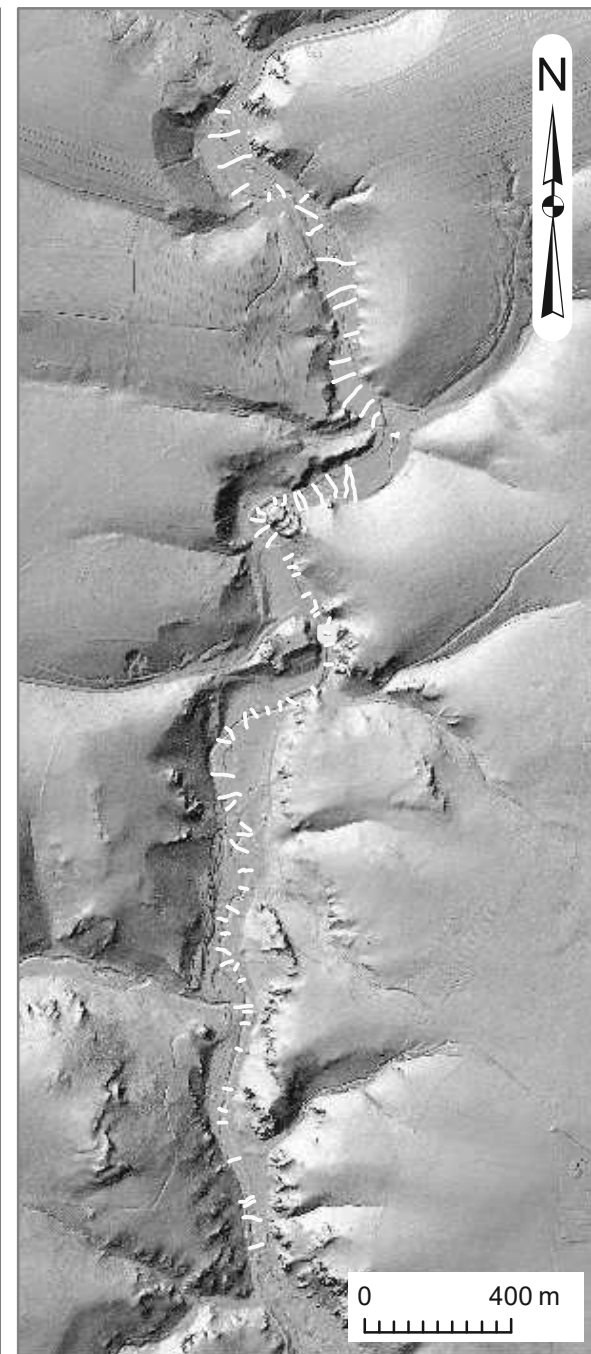

*Proile: 38* Analyses of the Prądnik riverbed shape based on archiva and contemporary data sets – old maps, LIDAR, DTMs and cross-sectional profile



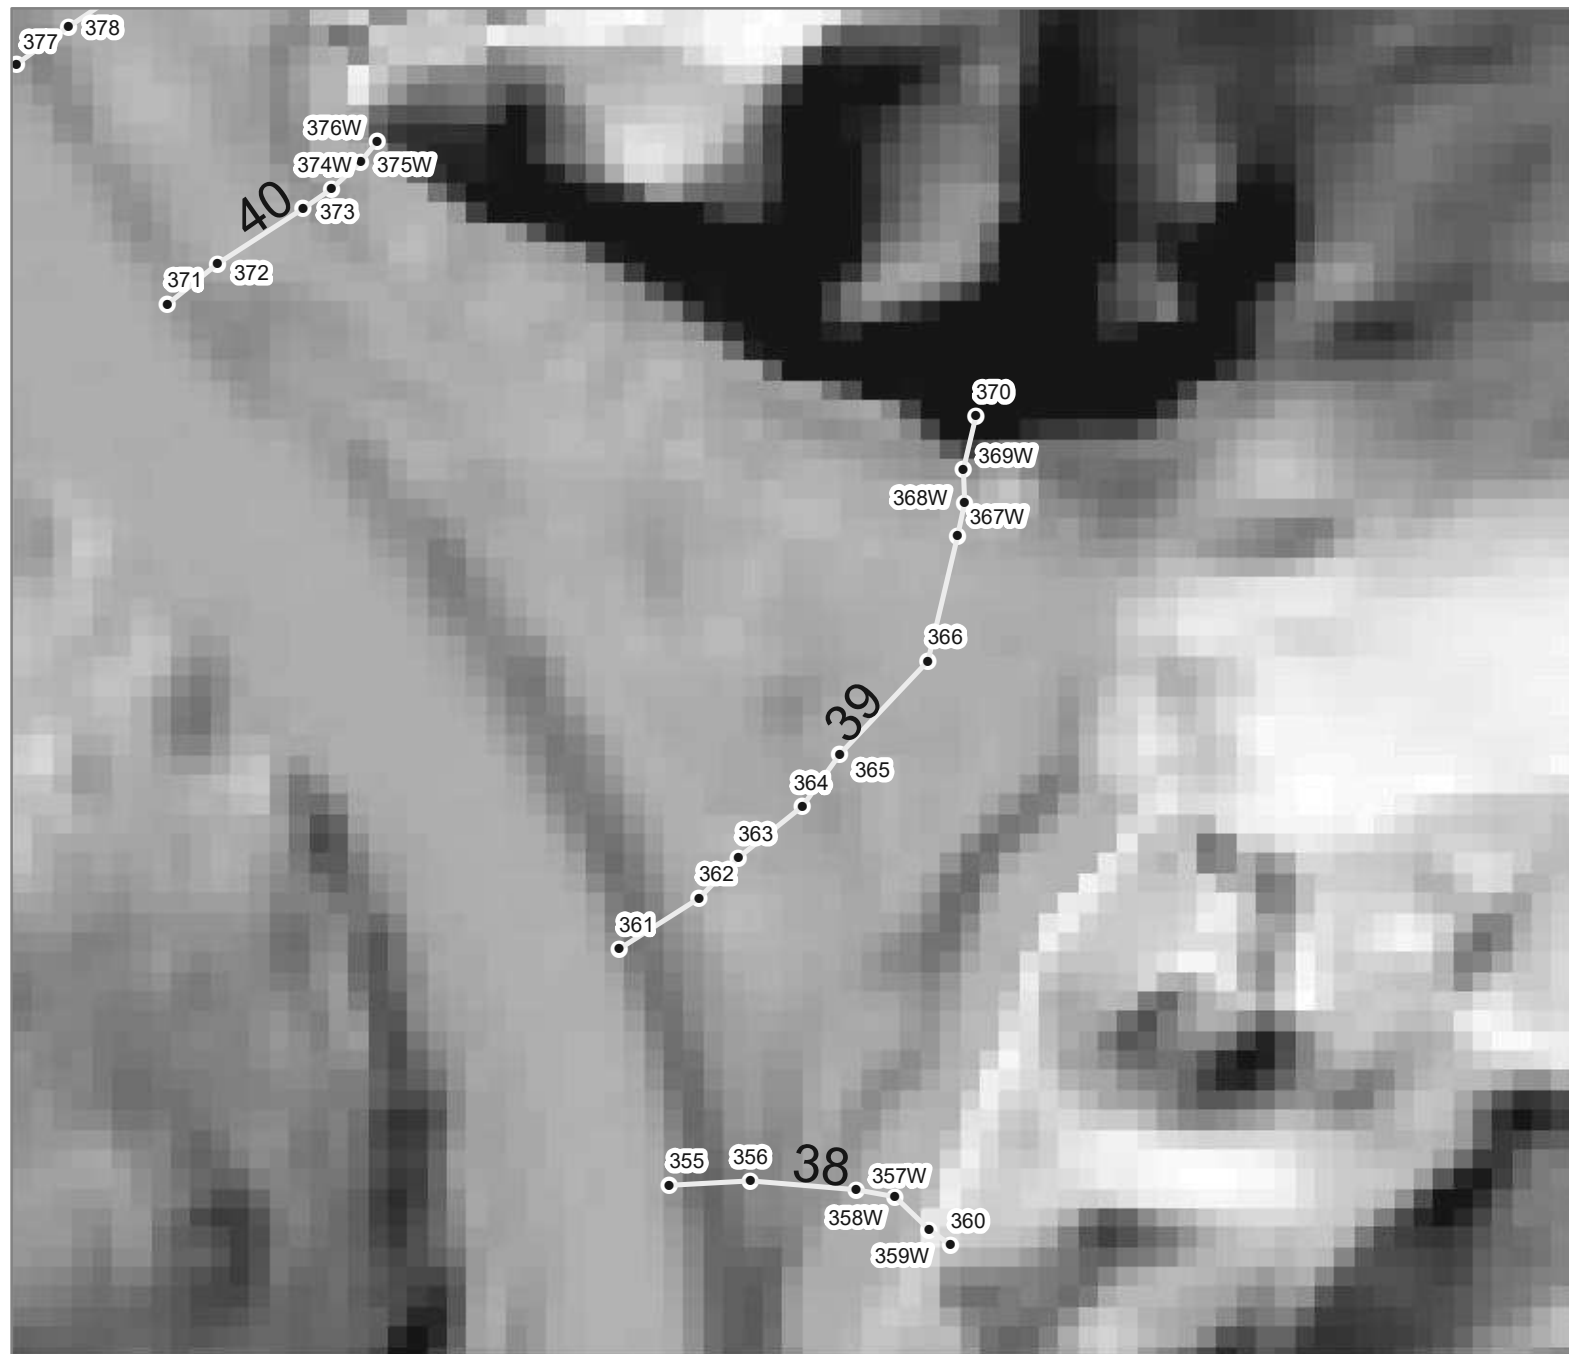

0 10 20 m

*Proile: 39* Analyses of the Prądnik riverbed shape based on archiva and contemporary data sets – old maps, LIDAR, DTMs and cross-sectional profile

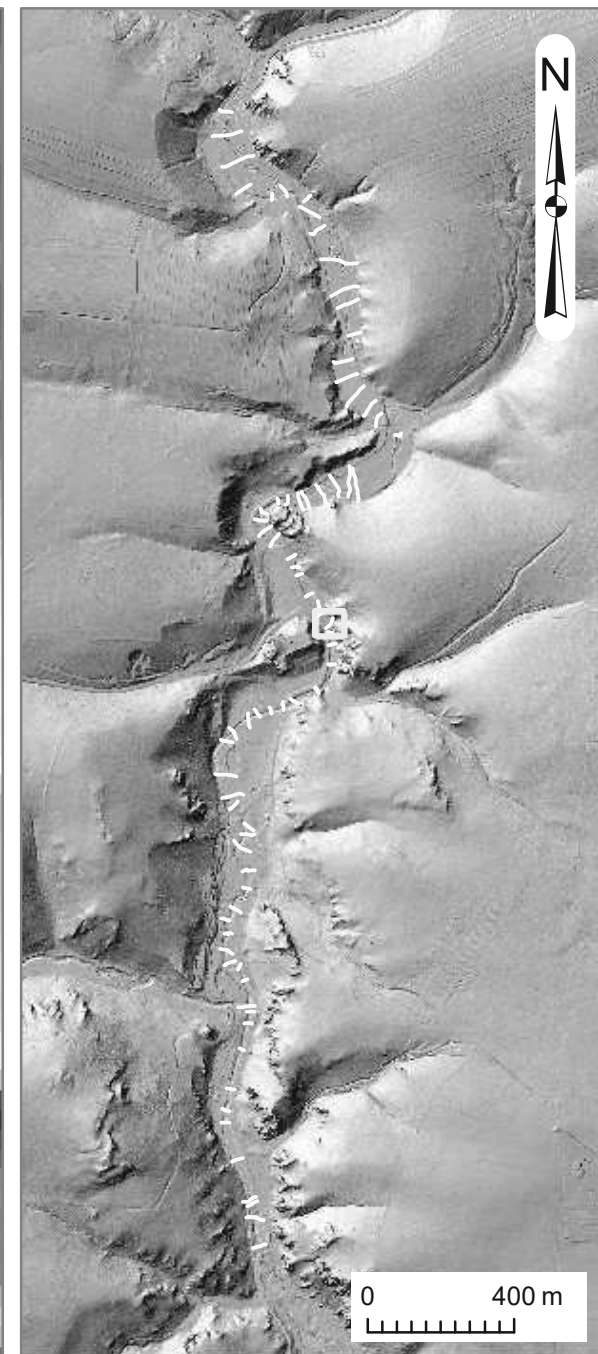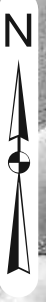

0 400 m

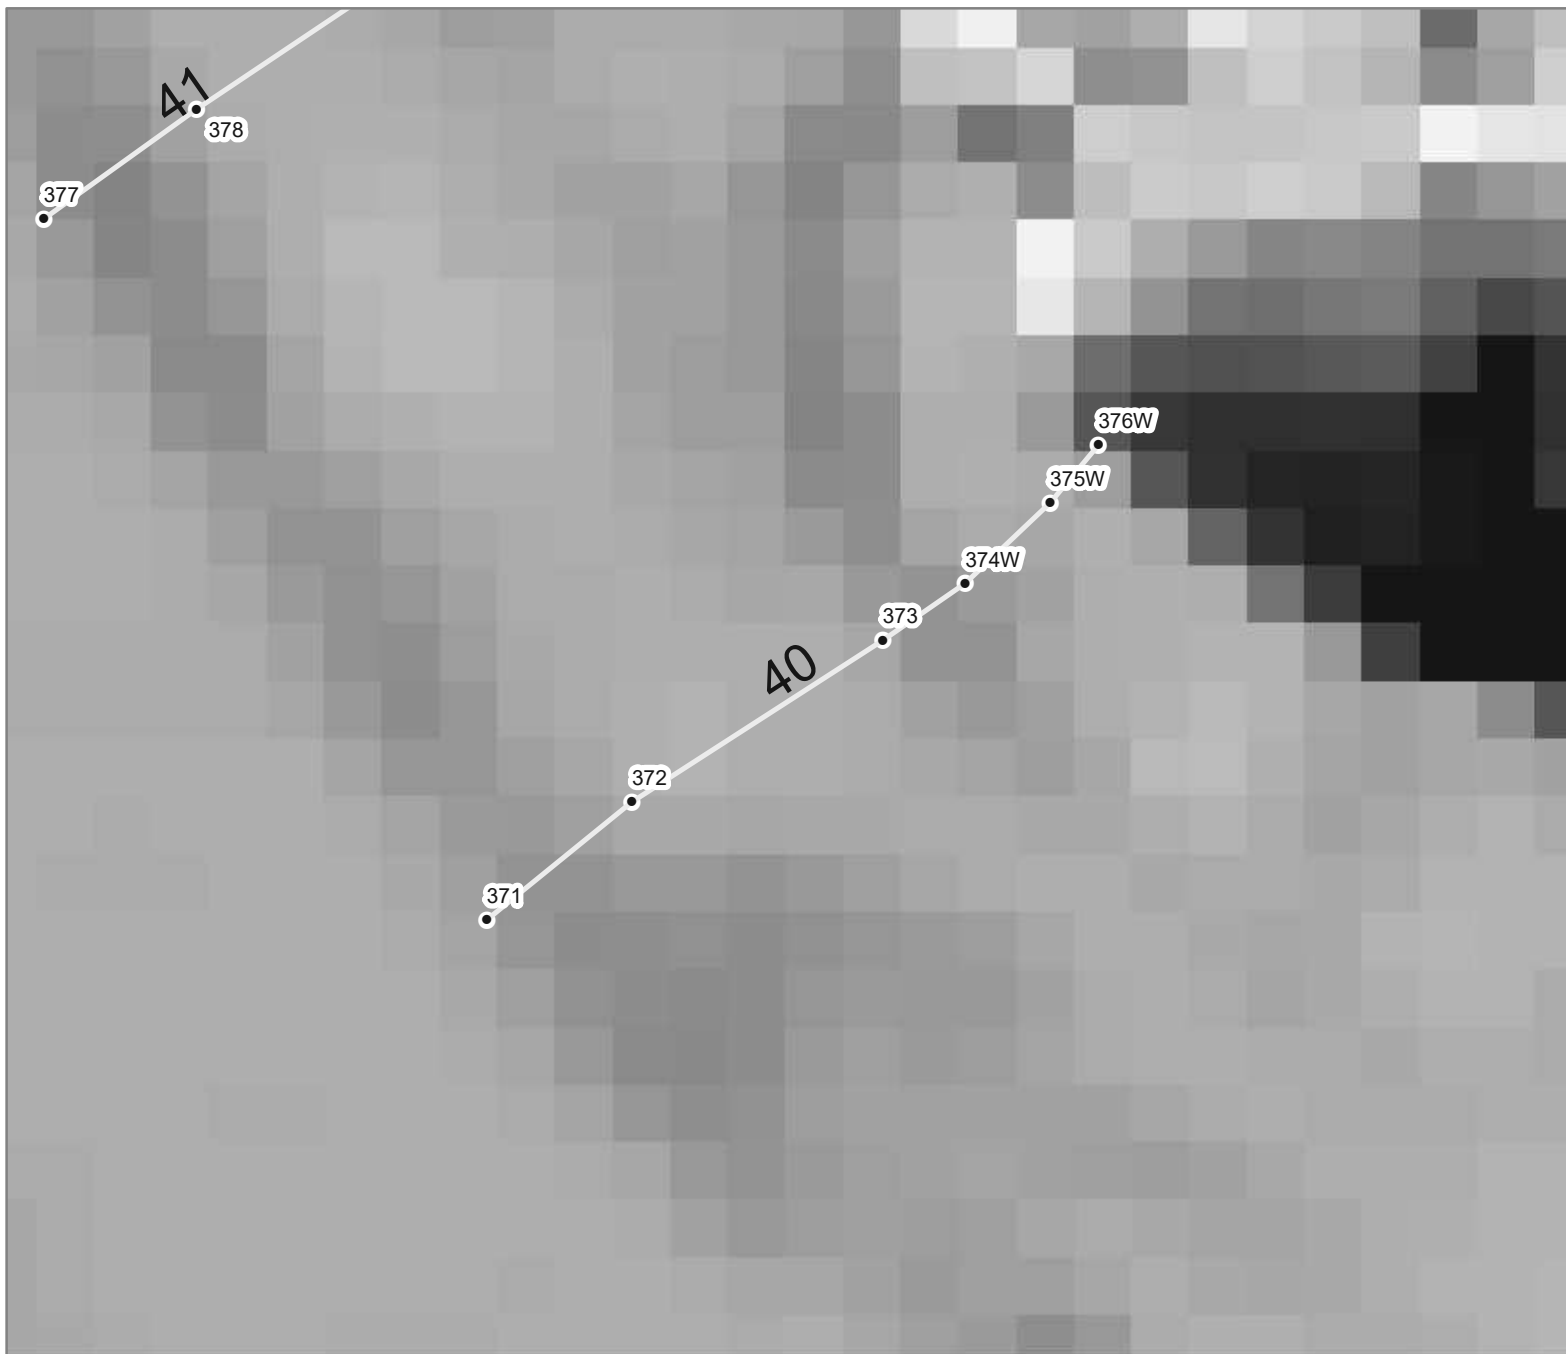

0 10 20 m

## Proile: 40

Analyses of the Prądnik riverbed shape based on archiva and contemporary data sets – old maps, LIDAR, DTMs and cross-sectional profile

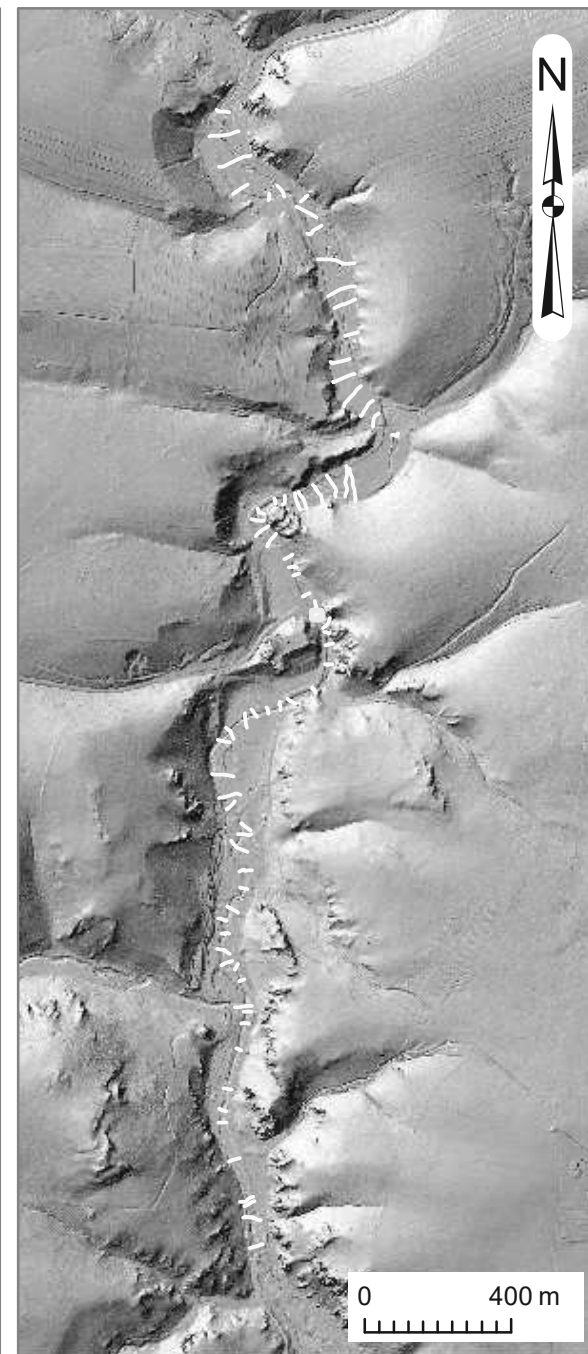

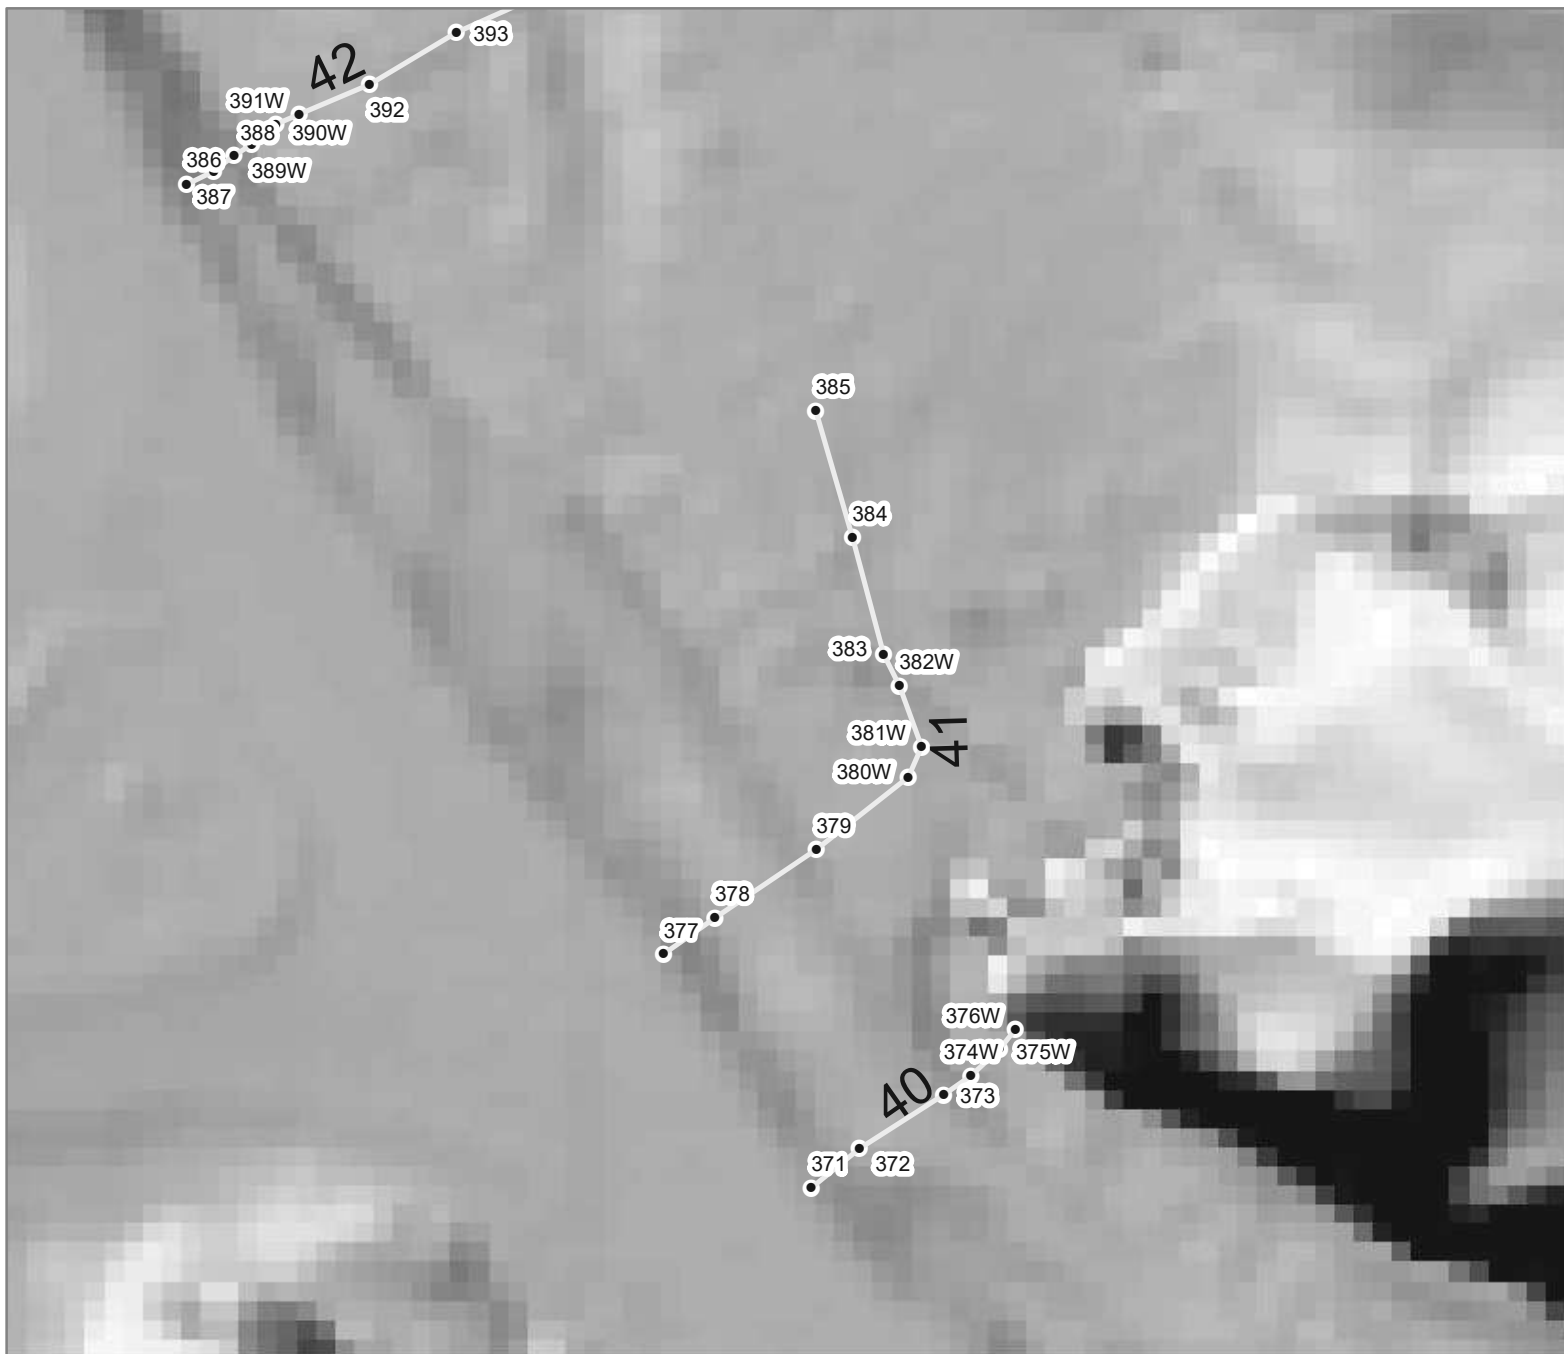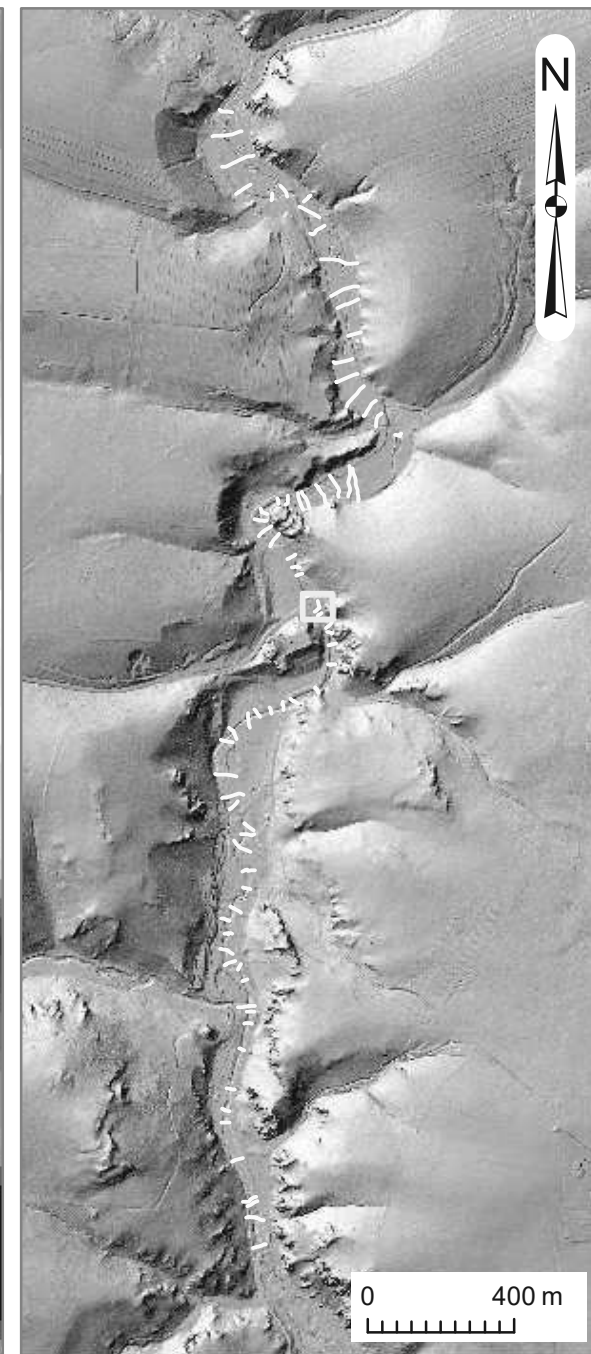

## Proile: 41

Analyses of the Prądnik riverbed shape based on archiva and contemporary data sets – old maps, LIDAR, DTMs and cross-sectional profile

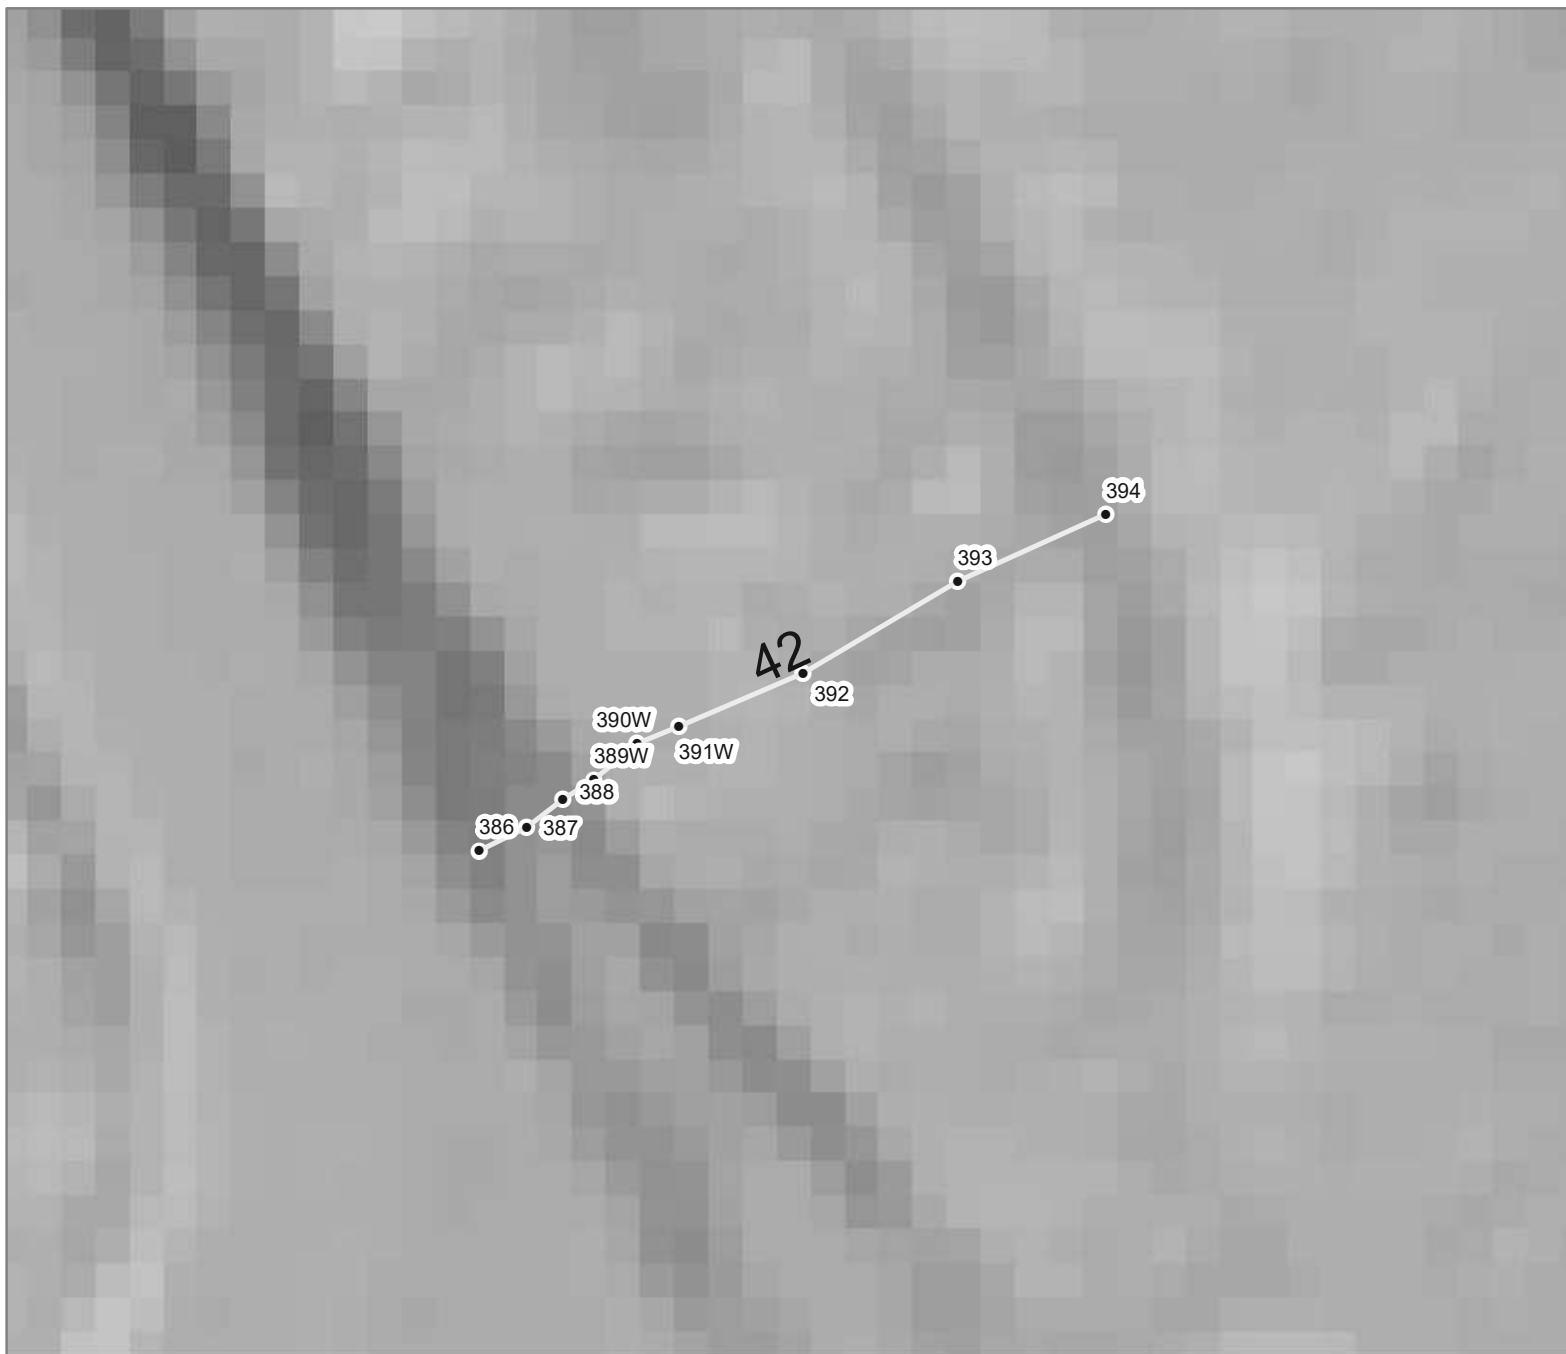

0 10 20 m

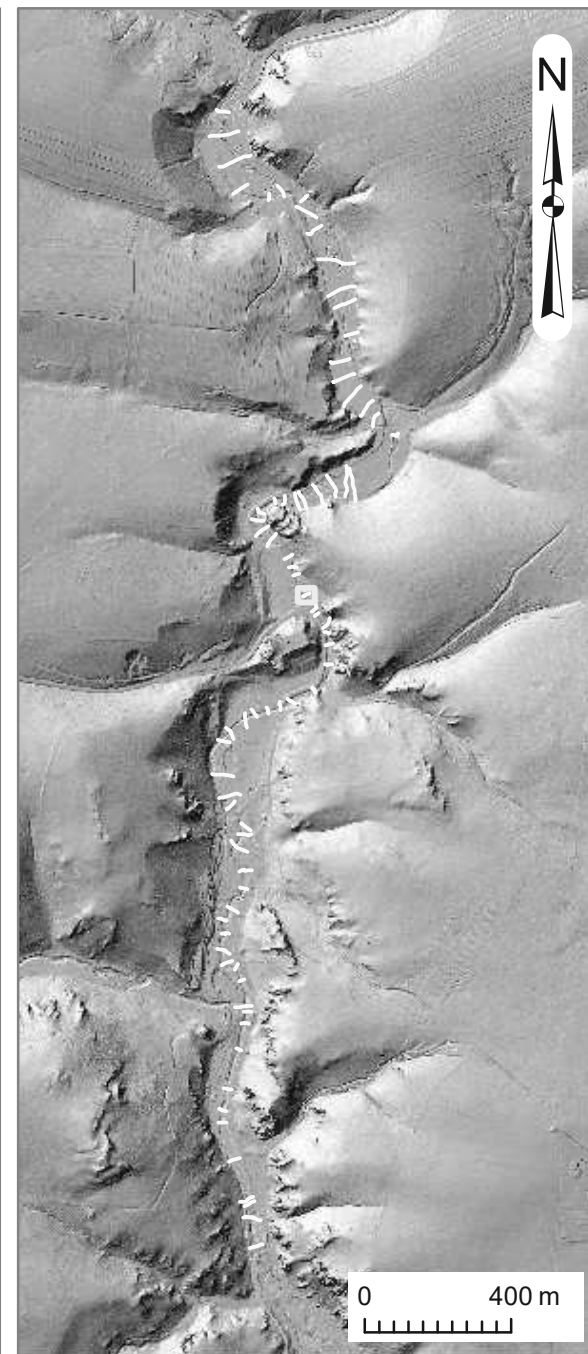

*Proile: 42* Analyses of the Prądnik riverbed shape based on archiva and contemporary data sets – old maps, LIDAR, DTMs and cross-sectional profile

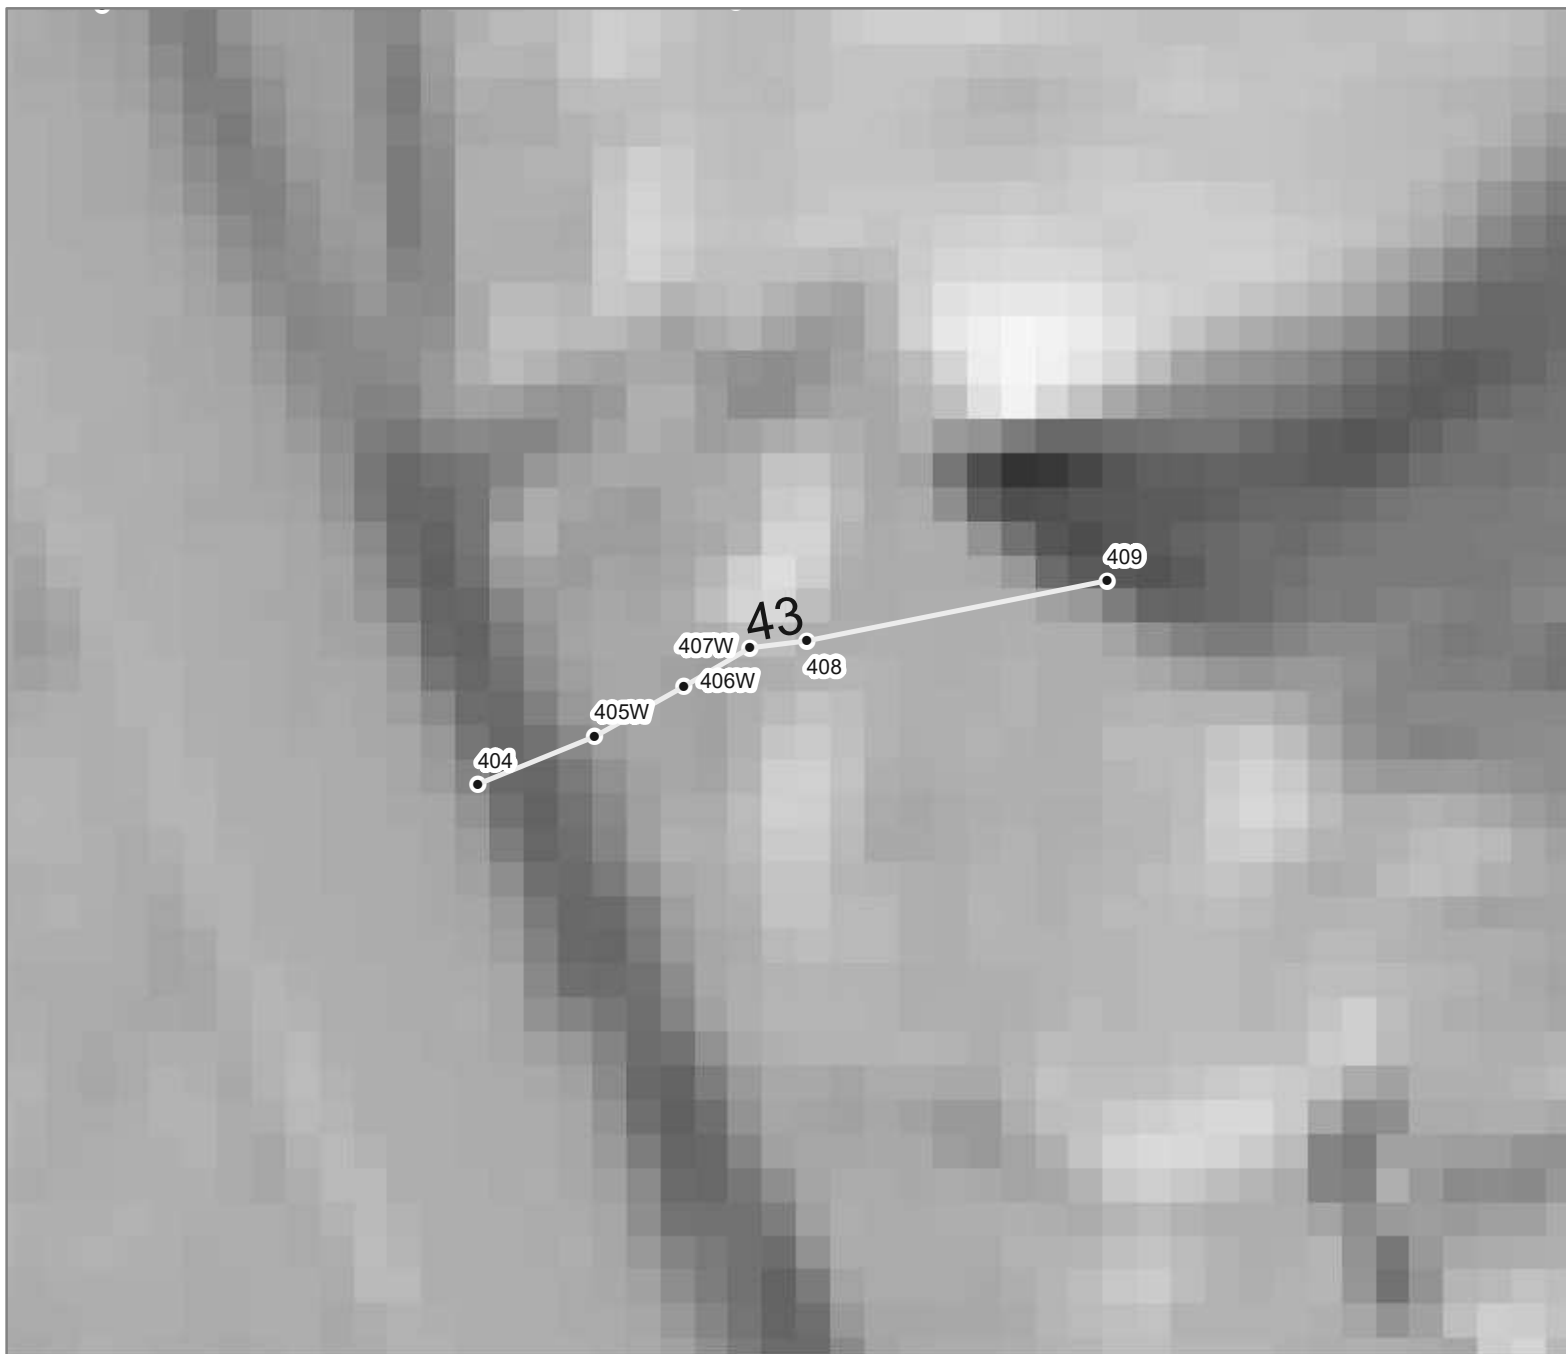

0 10 20 m

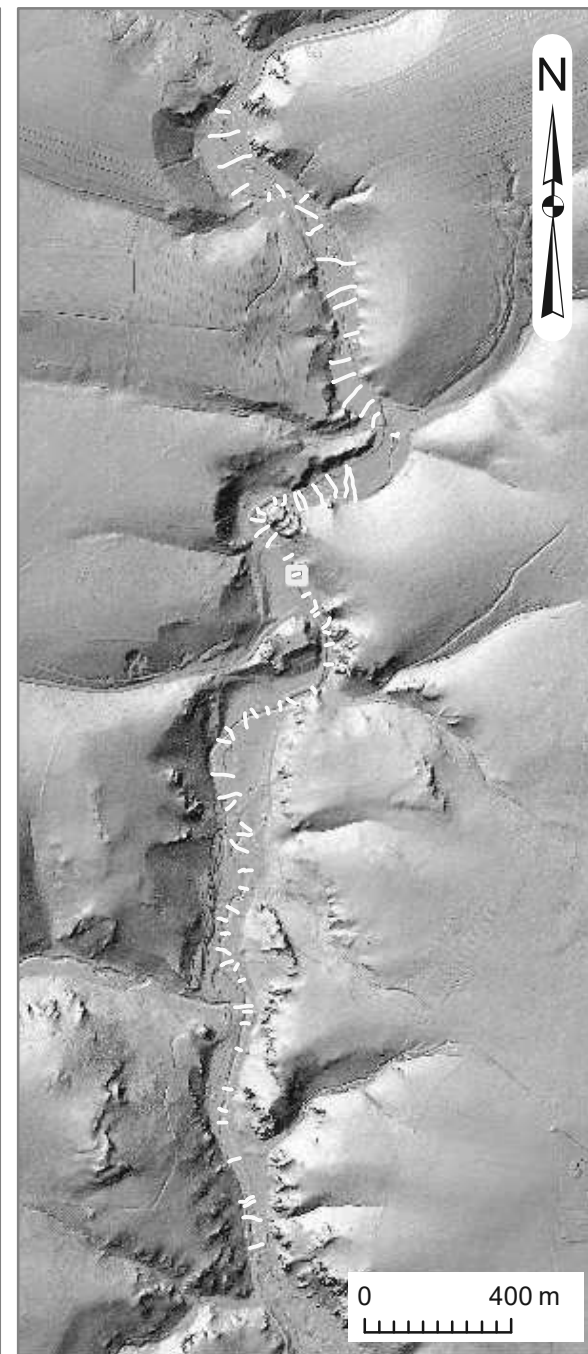

*Proile: 43* Analyses of the Prądnik riverbed shape based on archiva and contemporary data sets – old maps, LIDAR, DTMs and cross-sectional profile

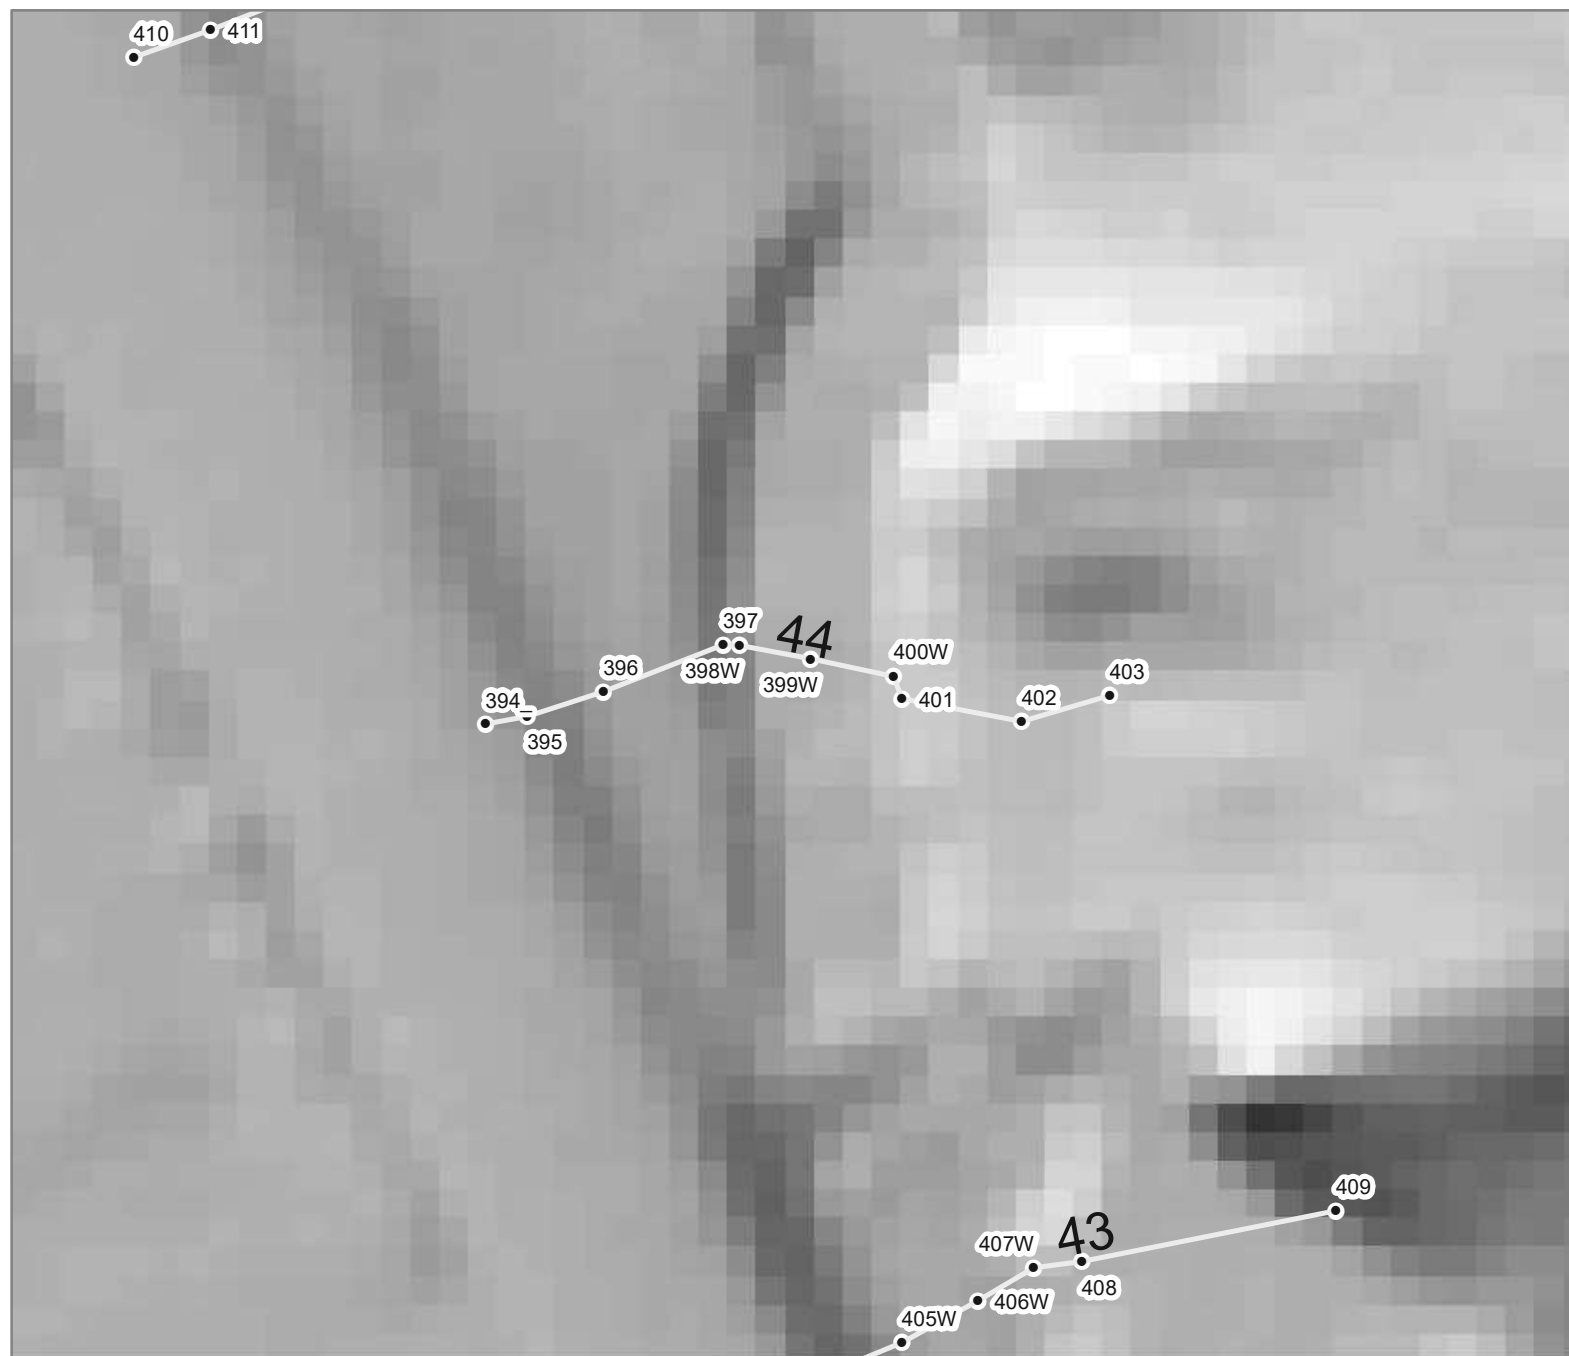

0 10 20 m

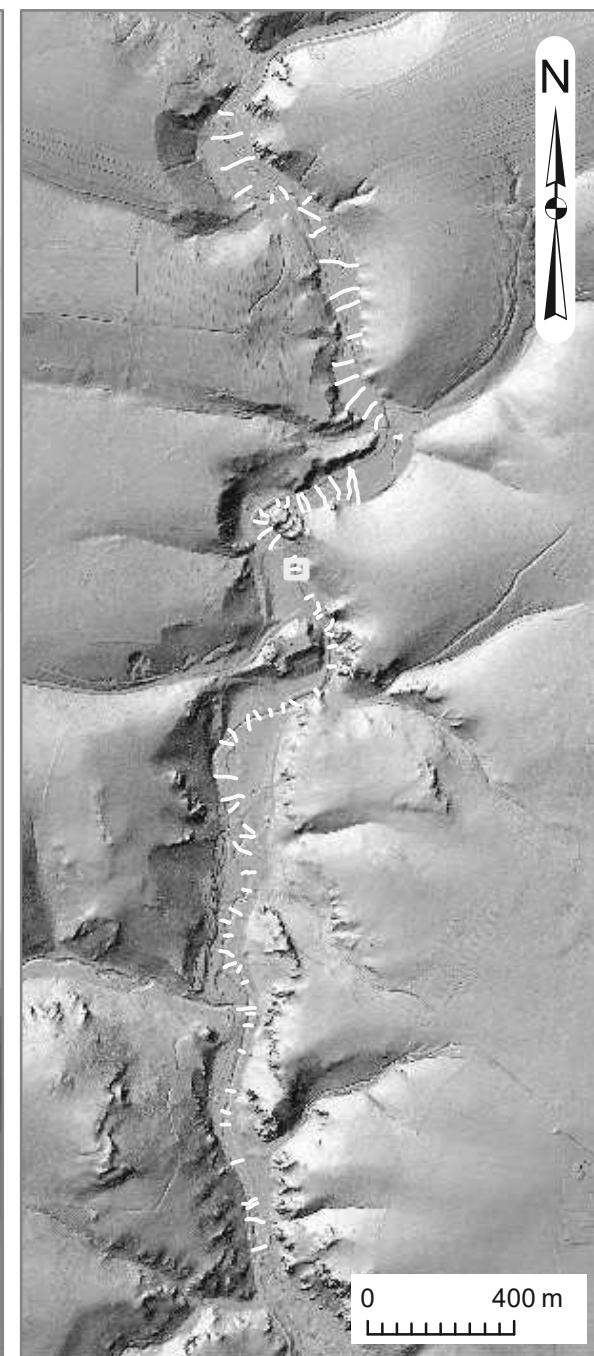

*Proile: 44* Analyses of the Prądnik riverbed shape based on archiva and contemporary data sets – old maps, LIDAR, DTMs and cross-sectional profile



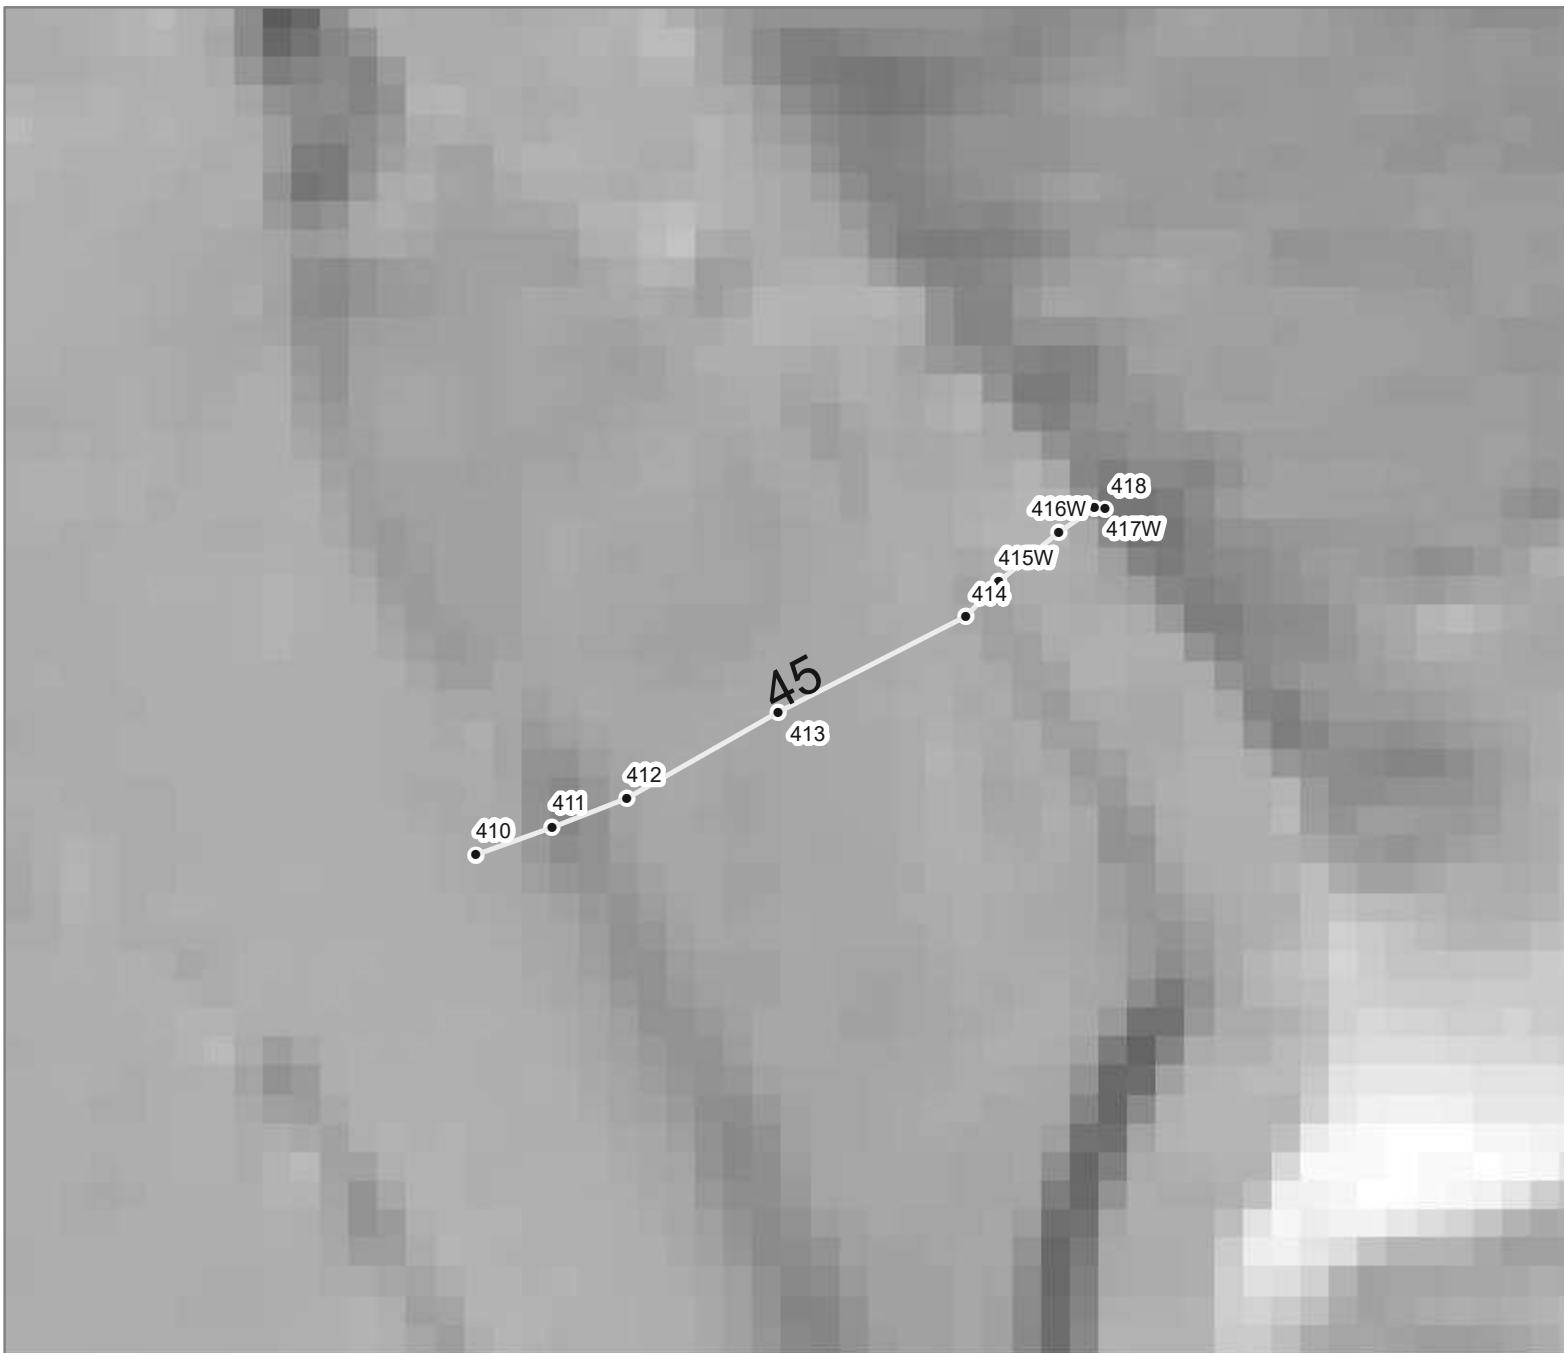

0 10 20 m

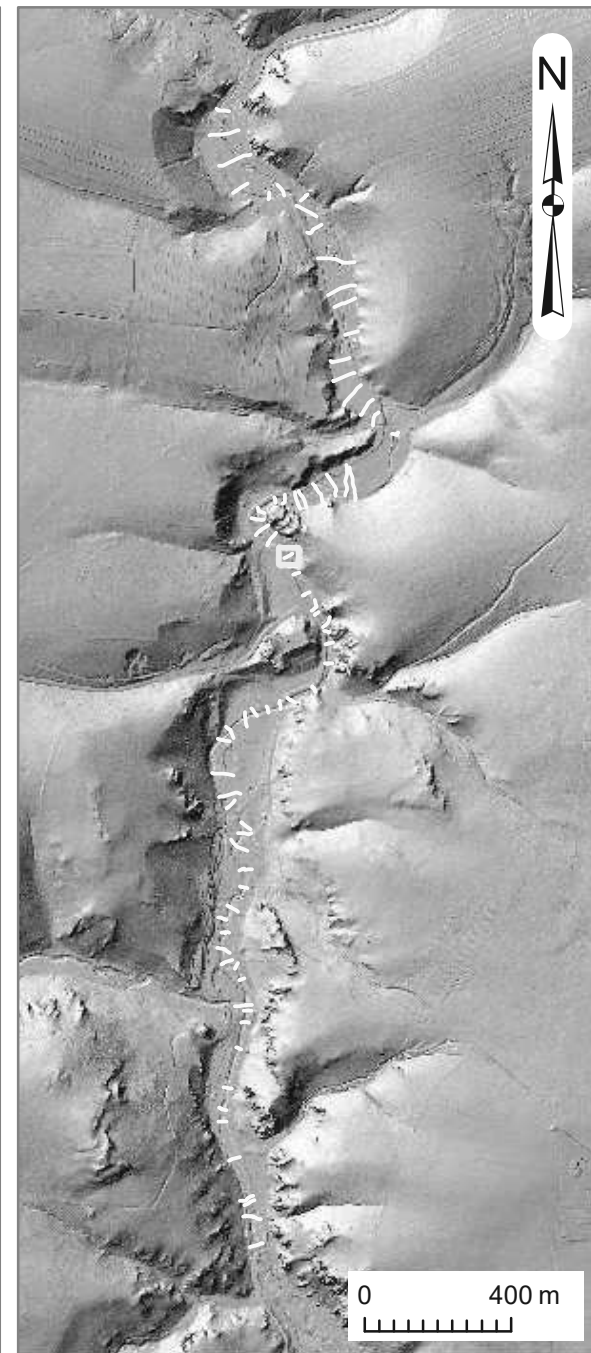

0 400 m

*Proile: 45* Analyses of the Prądnik riverbed shape based on archiva and contemporary data sets – old maps, LIDAR, DTMs and cross-sectional profile

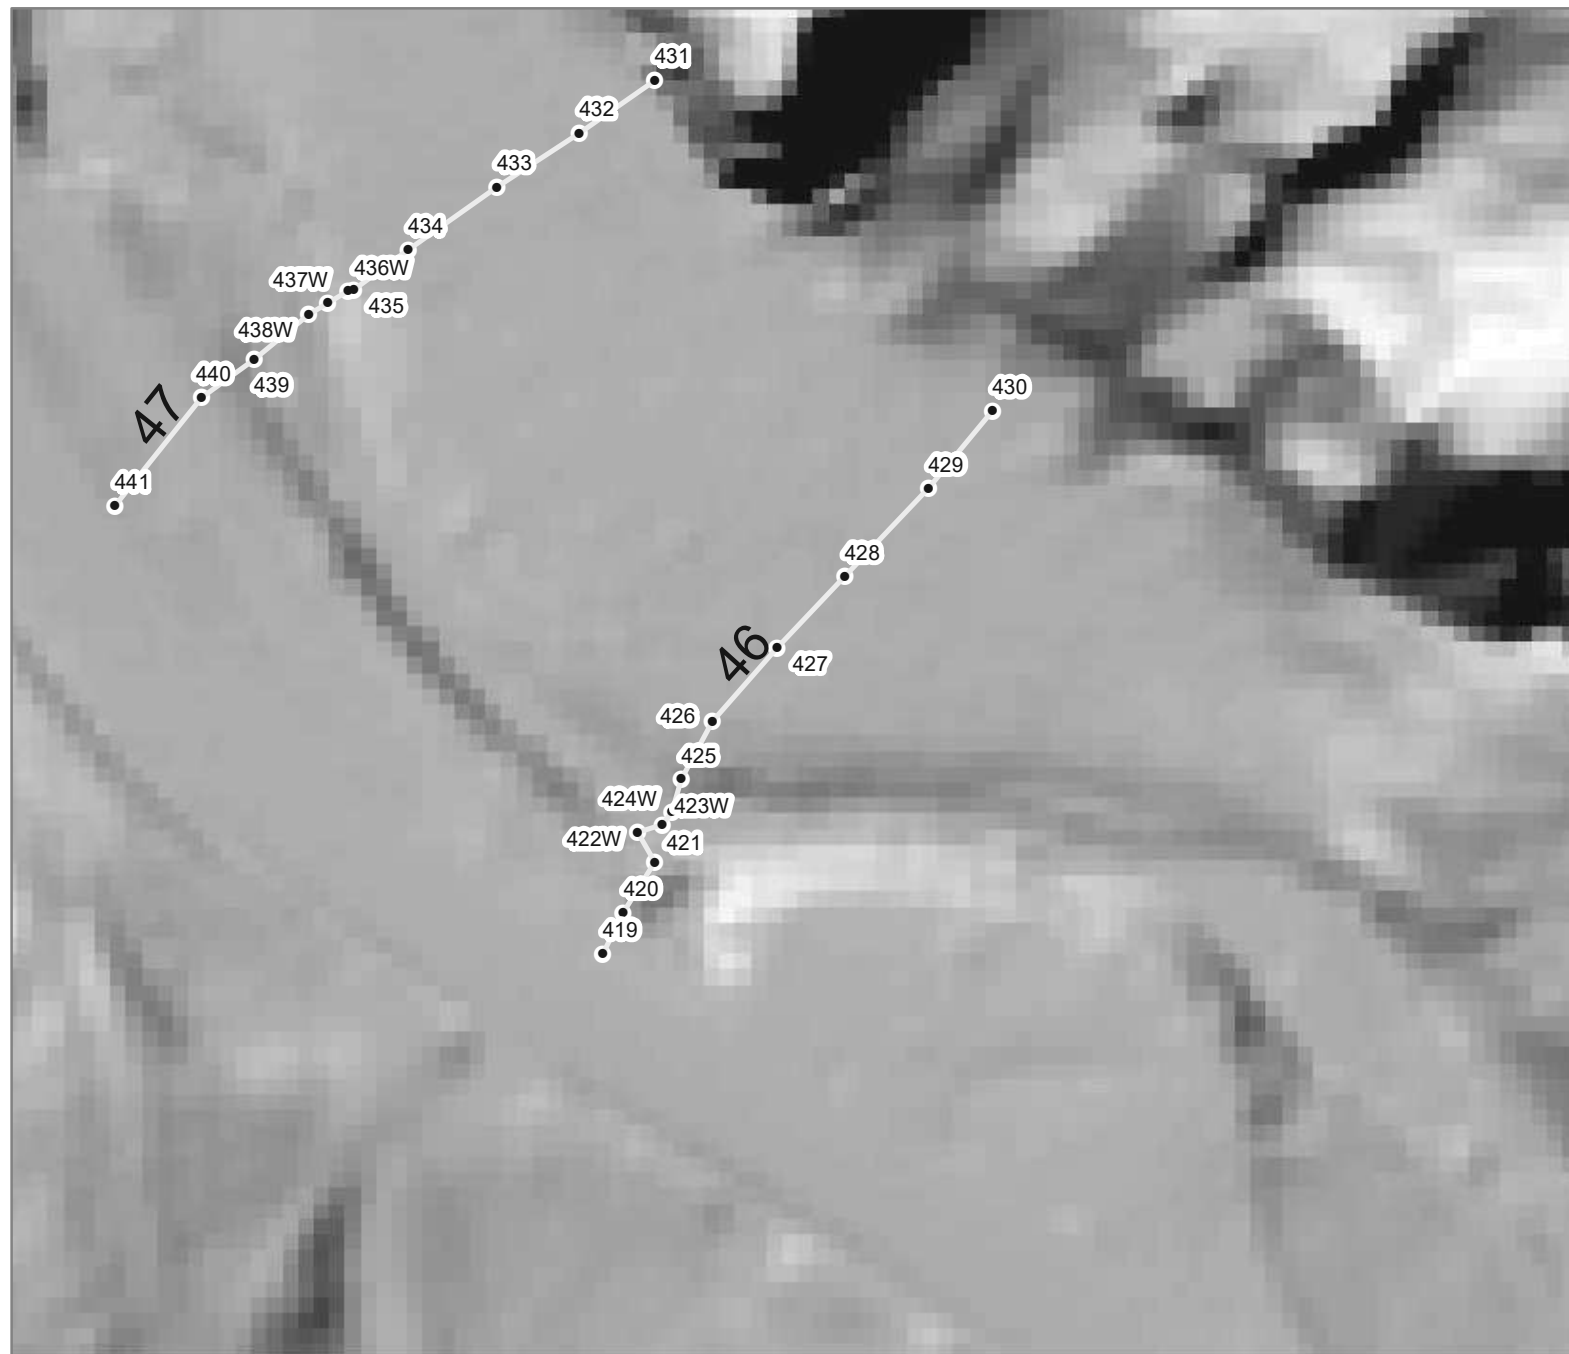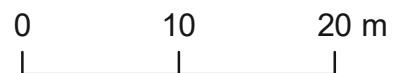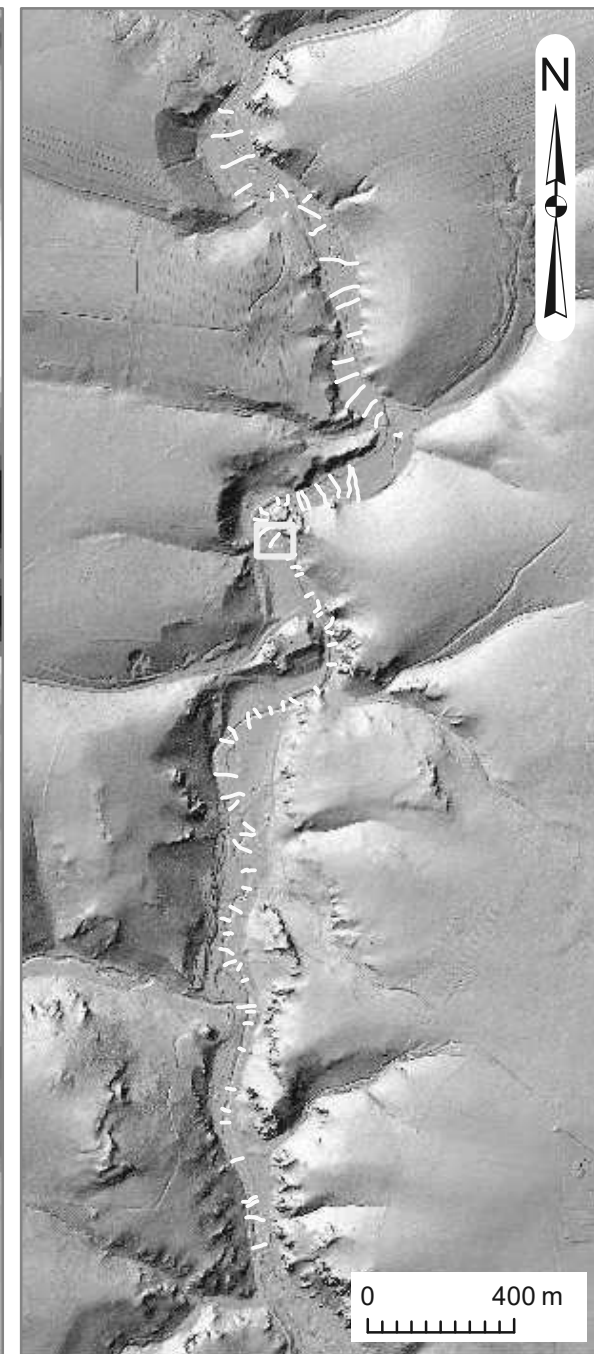

*Proile: 46* Analyses of the Prądnik riverbed shape based on archiva and contemporary data sets – old maps, LIDAR, DTMs and cross-sectional profile

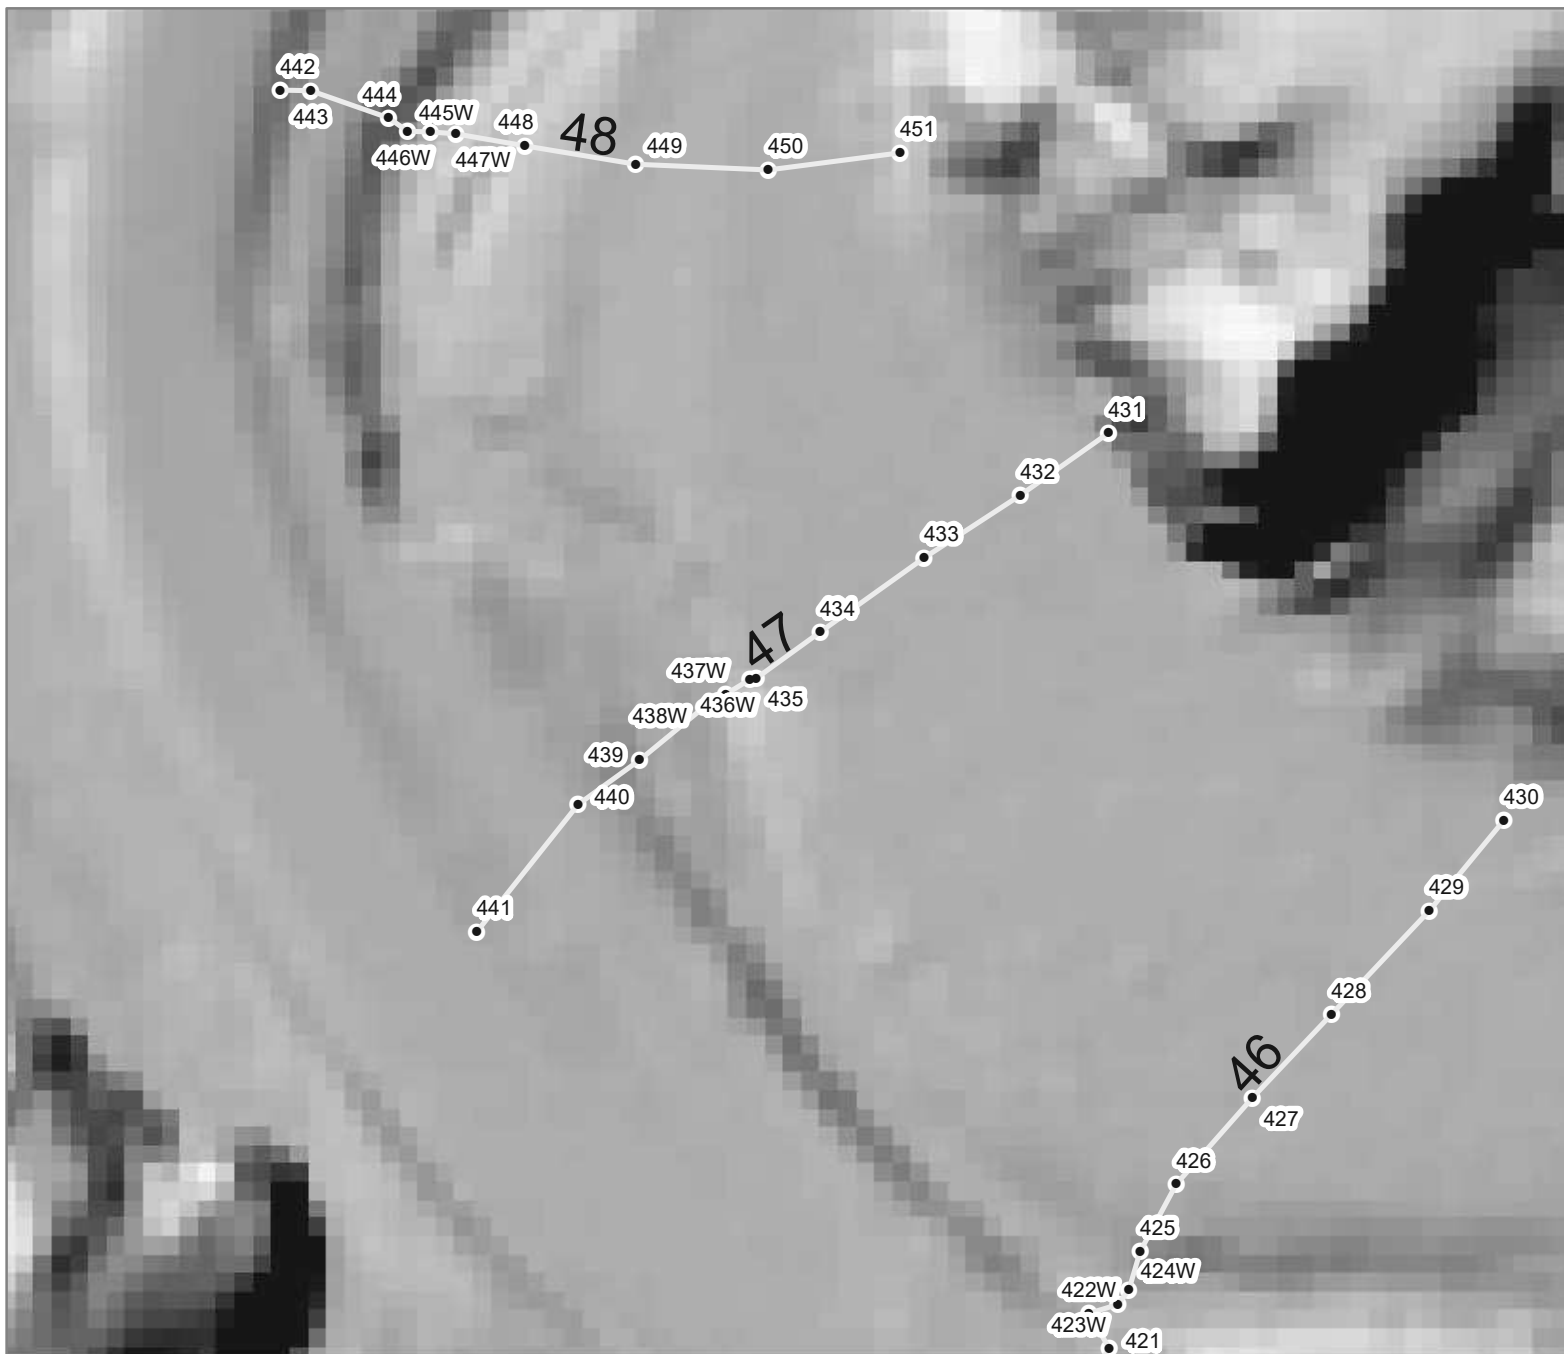

0 10 20 m

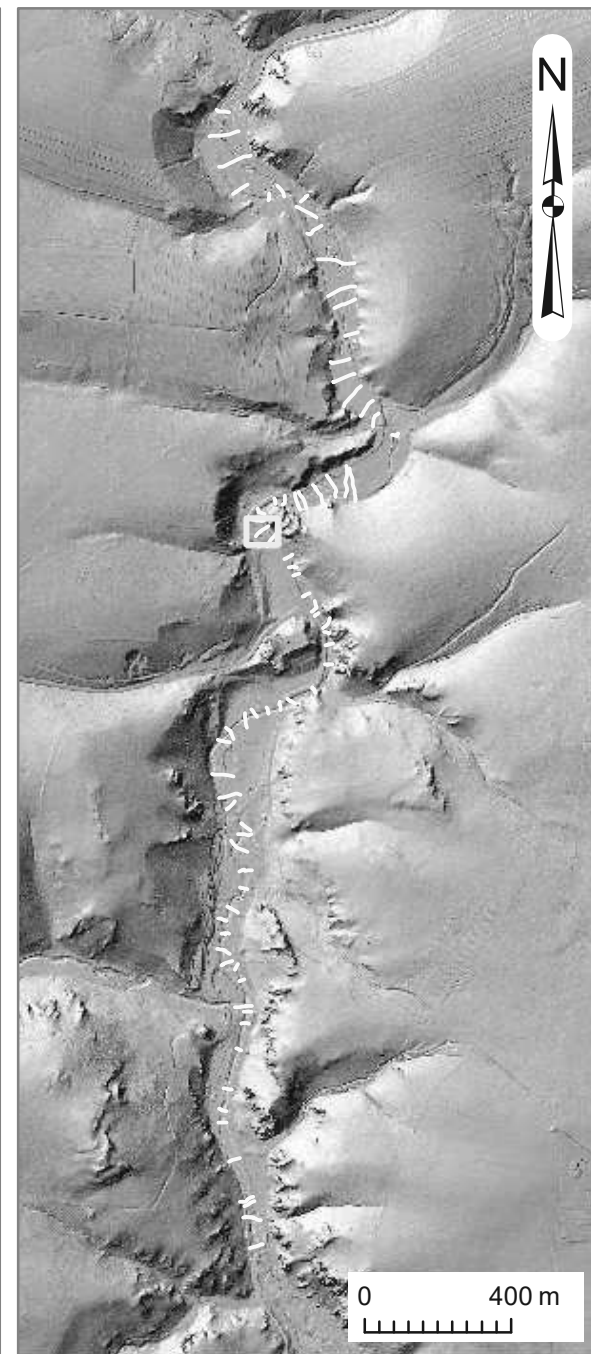

0 400 m

*Proile: 47* Analyses of the Prądnik riverbed shape based on archiva and contemporary data sets – old maps, LIDAR, DTMs and cross-sectional profile

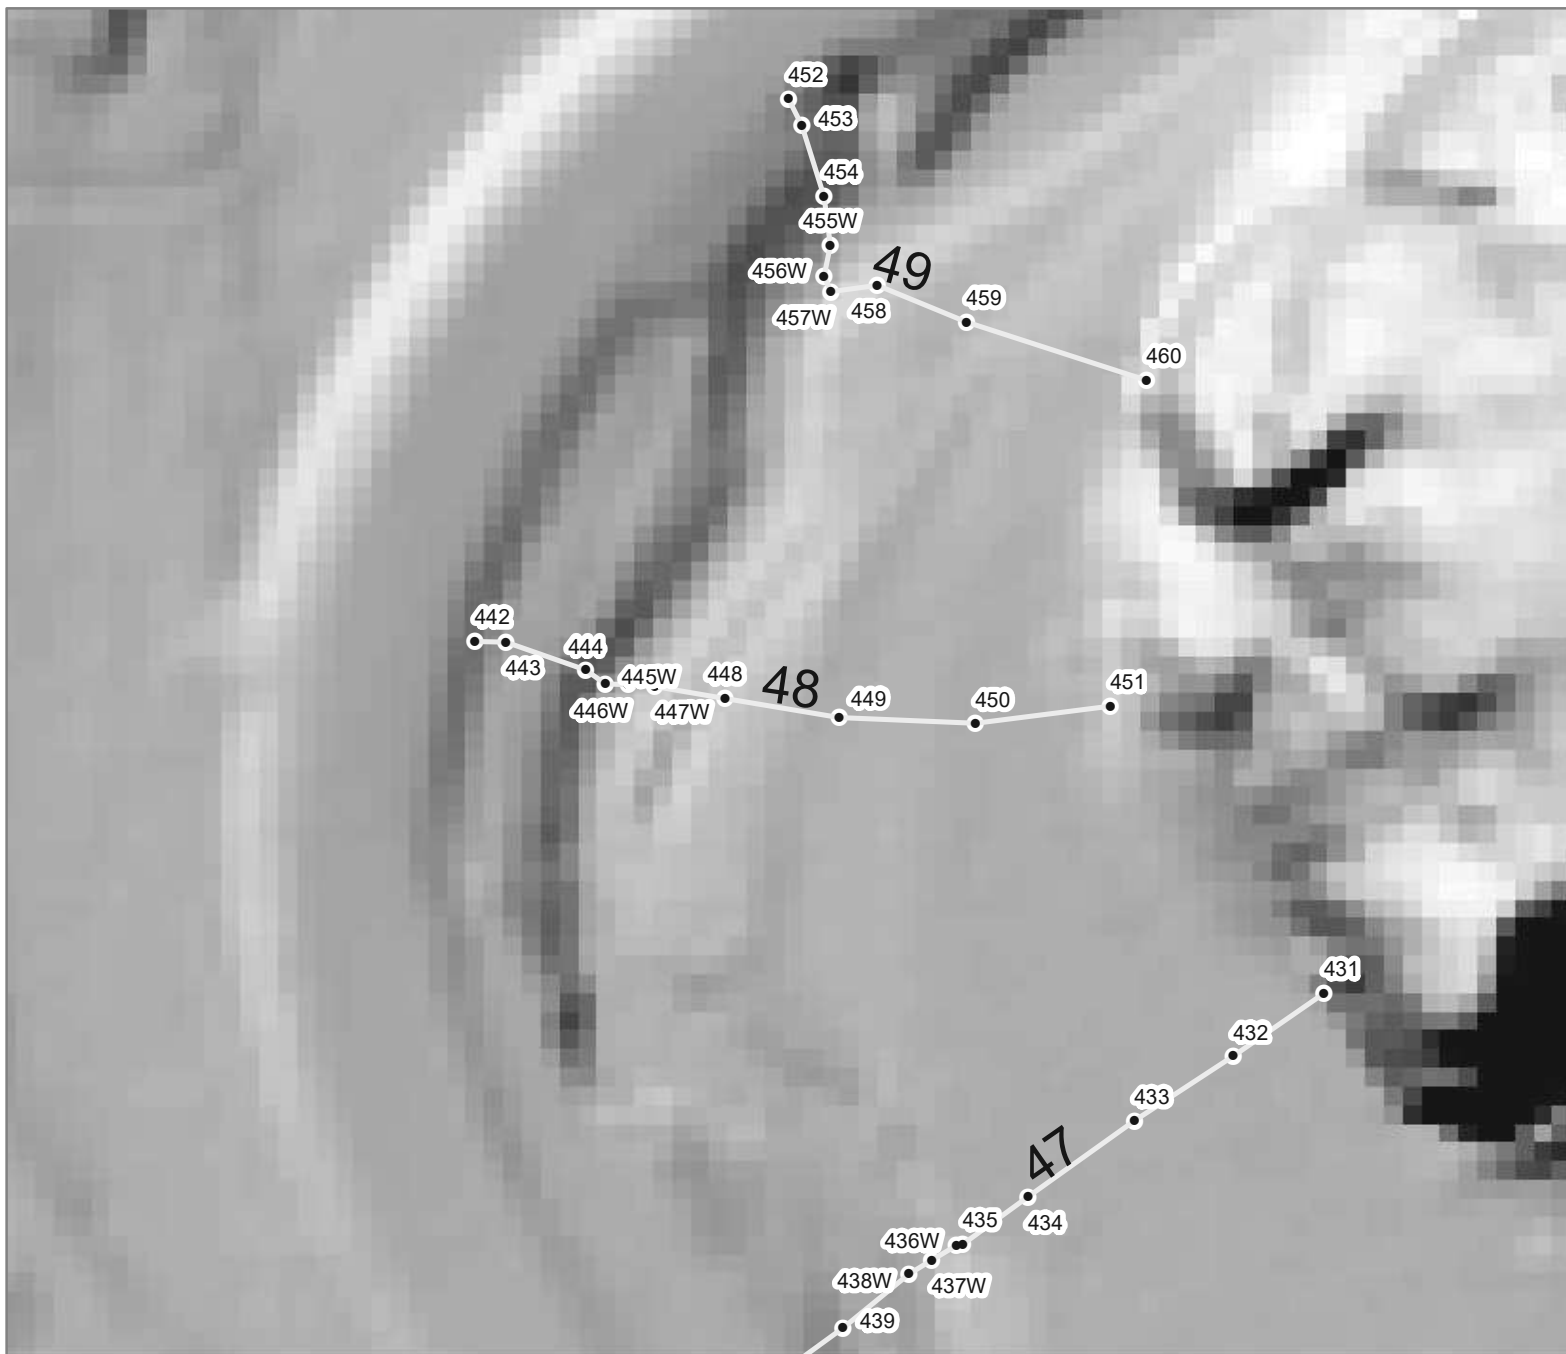

0 10 20 m

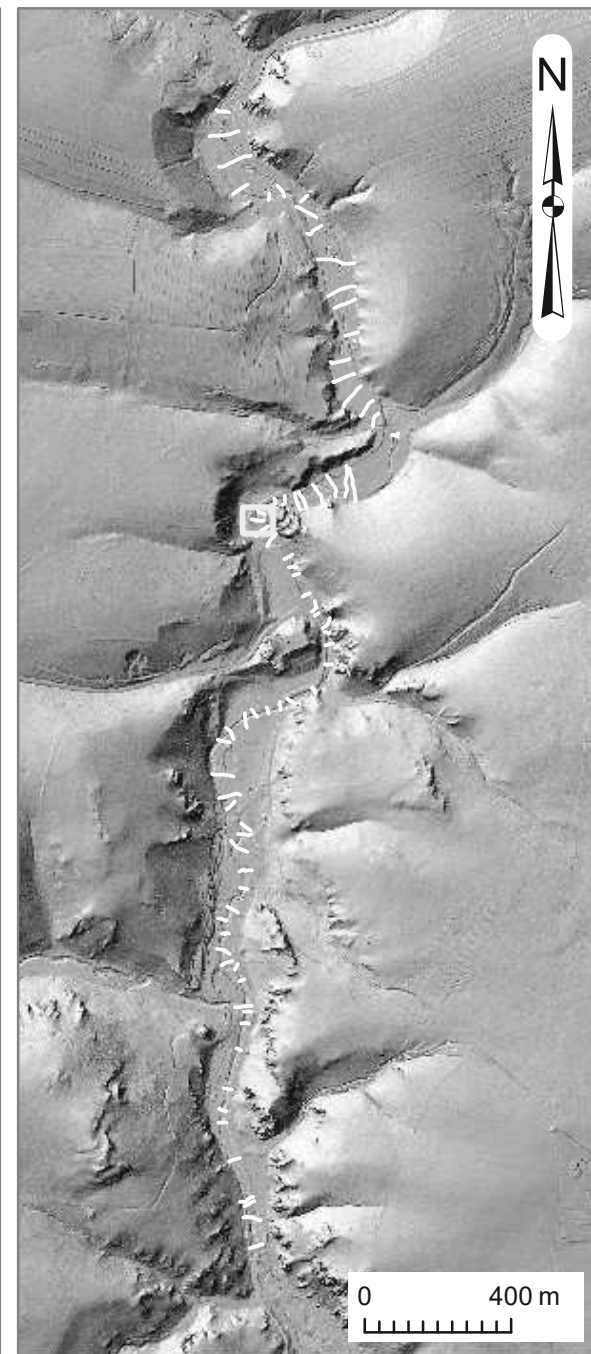

0 400 m

*Proile: 48* Analyses of the Prądnik riverbed shape based on archiva and contemporary data sets – old maps, LIDAR, DTMs and cross-sectional profile

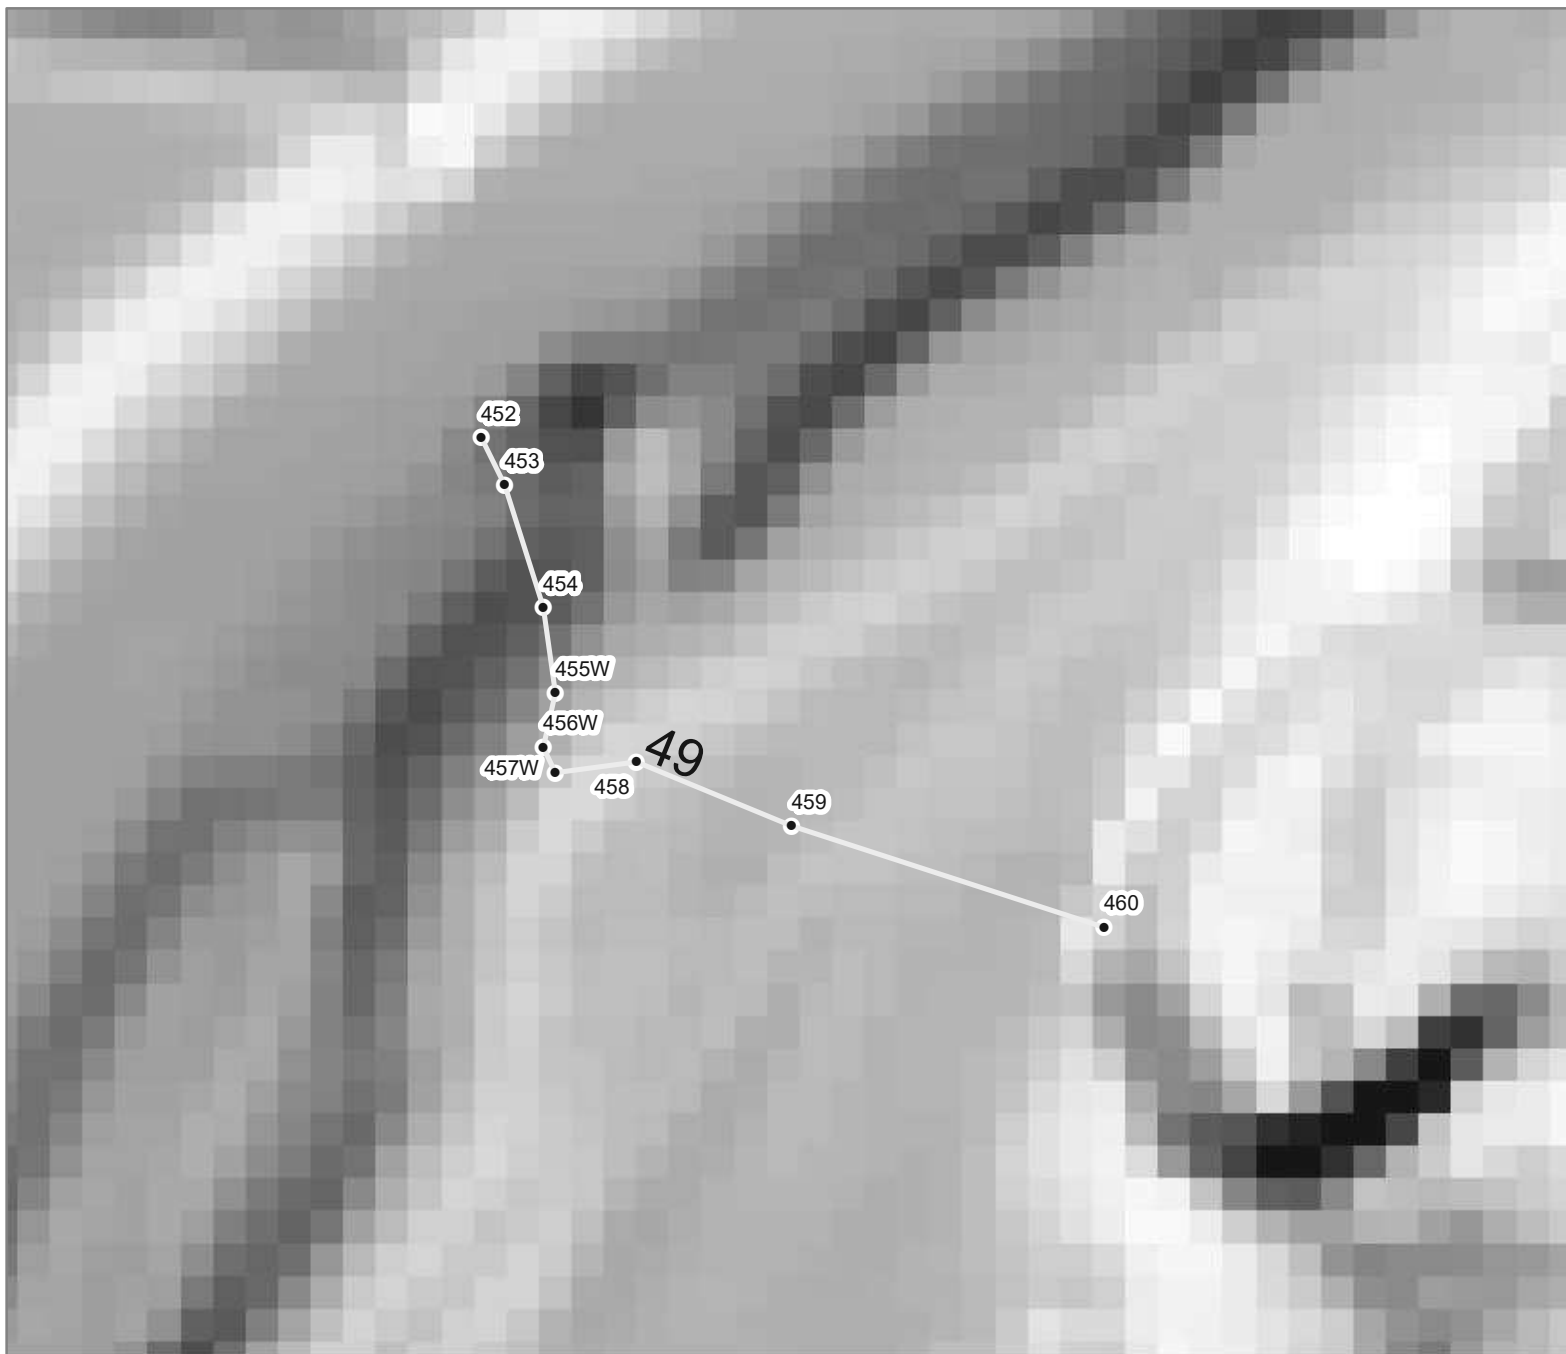

0 10 20 m

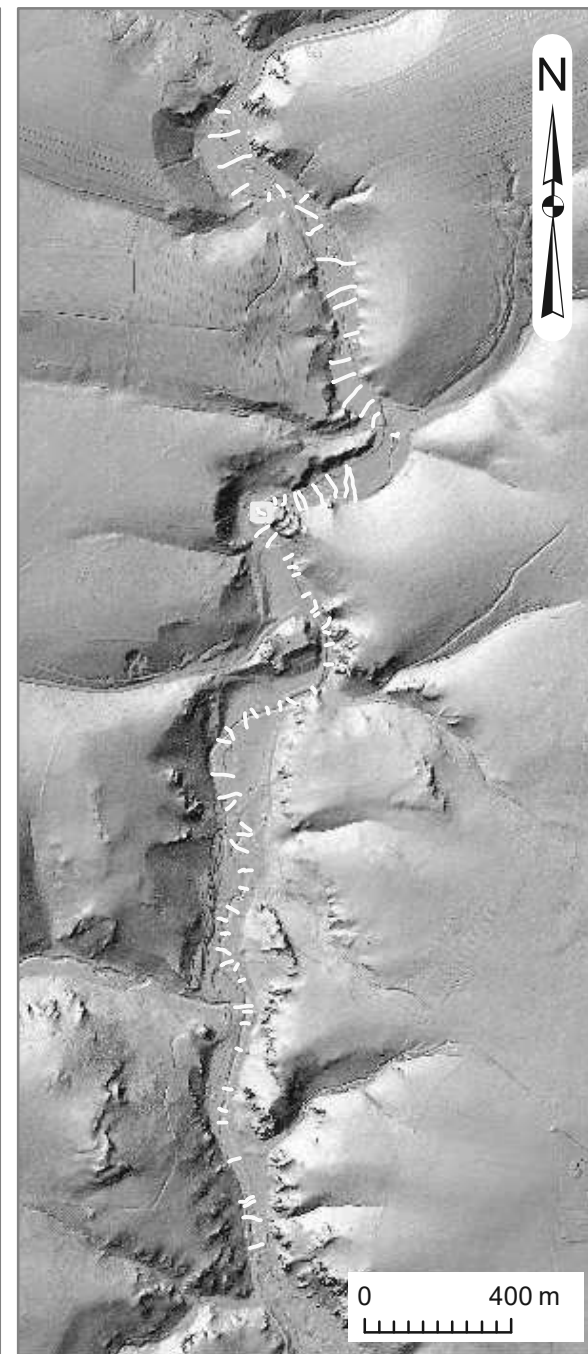

*Proile: 49* Analyses of the Prądnik riverbed shape based on archiva and contemporary data sets – old maps, LIDAR, DTMs and cross-sectional profile

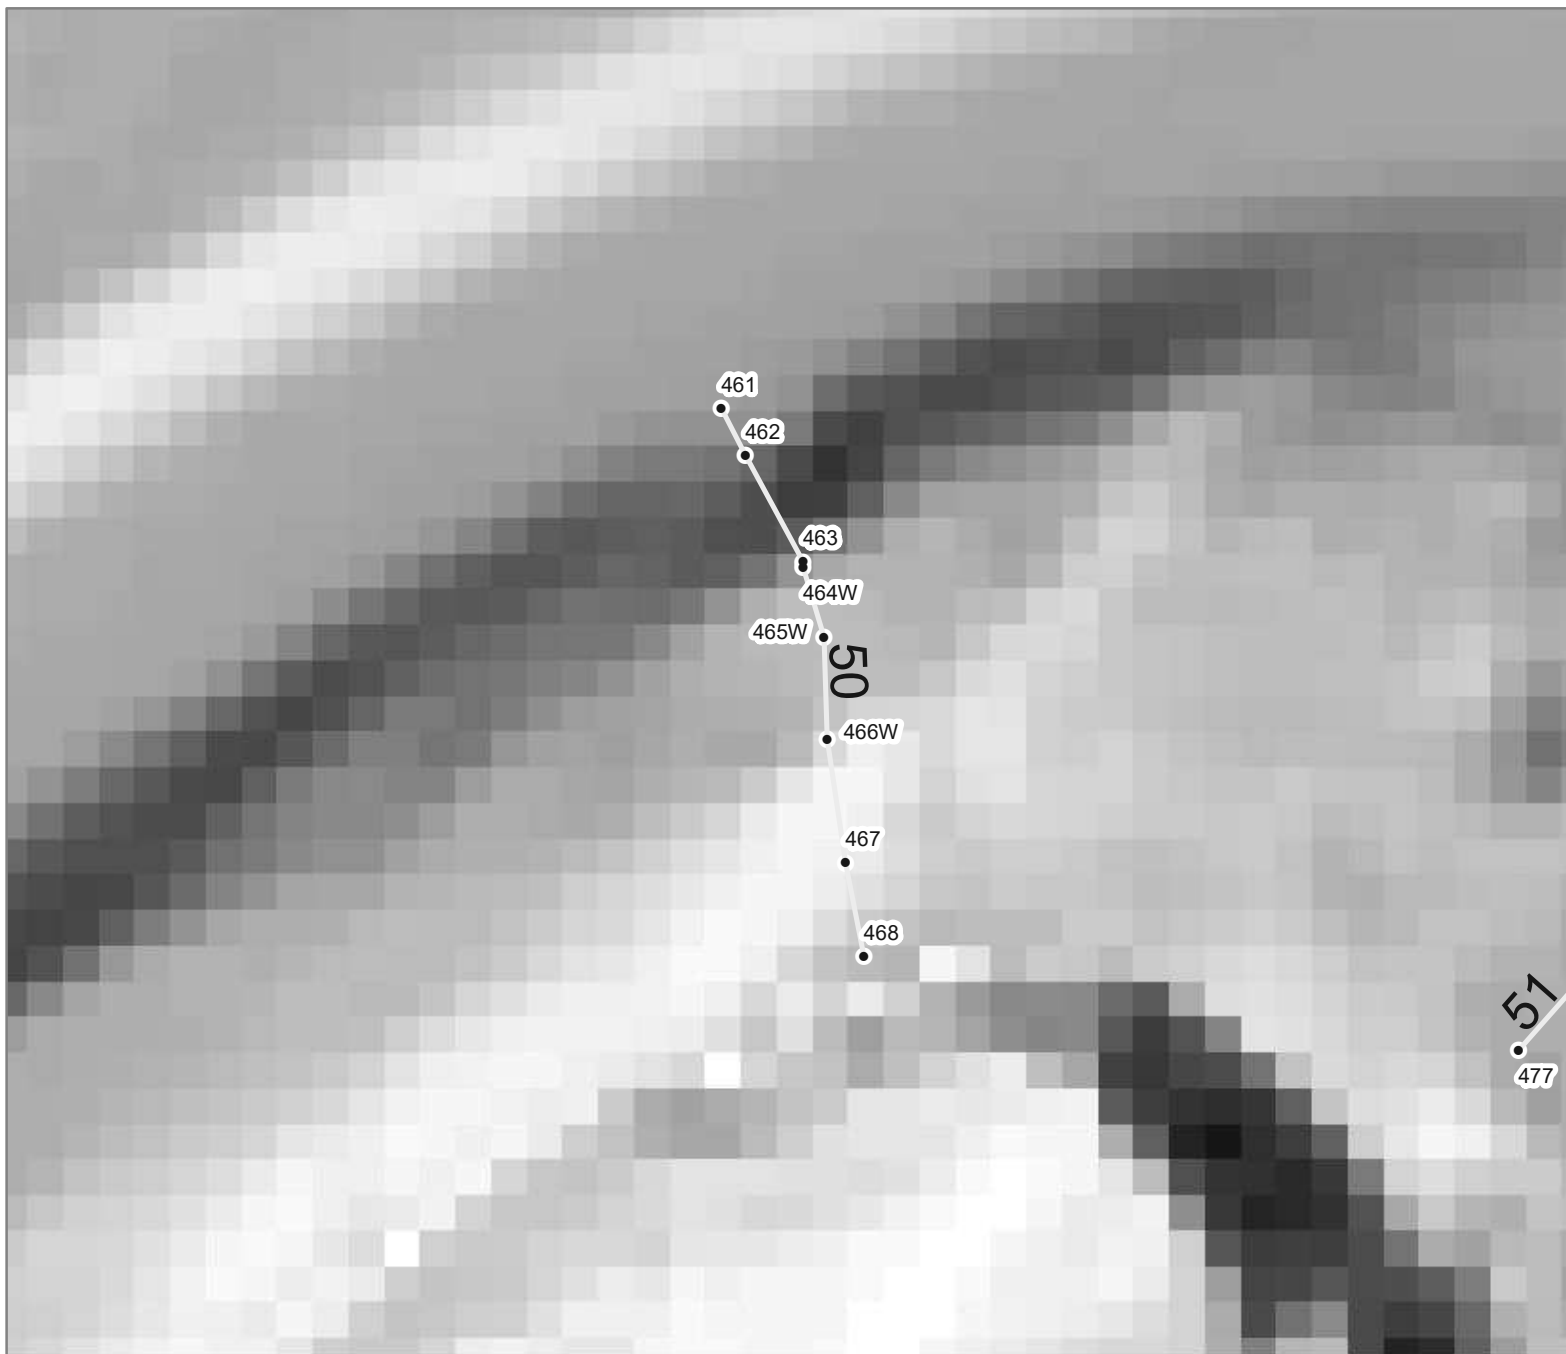

0 10 20 m

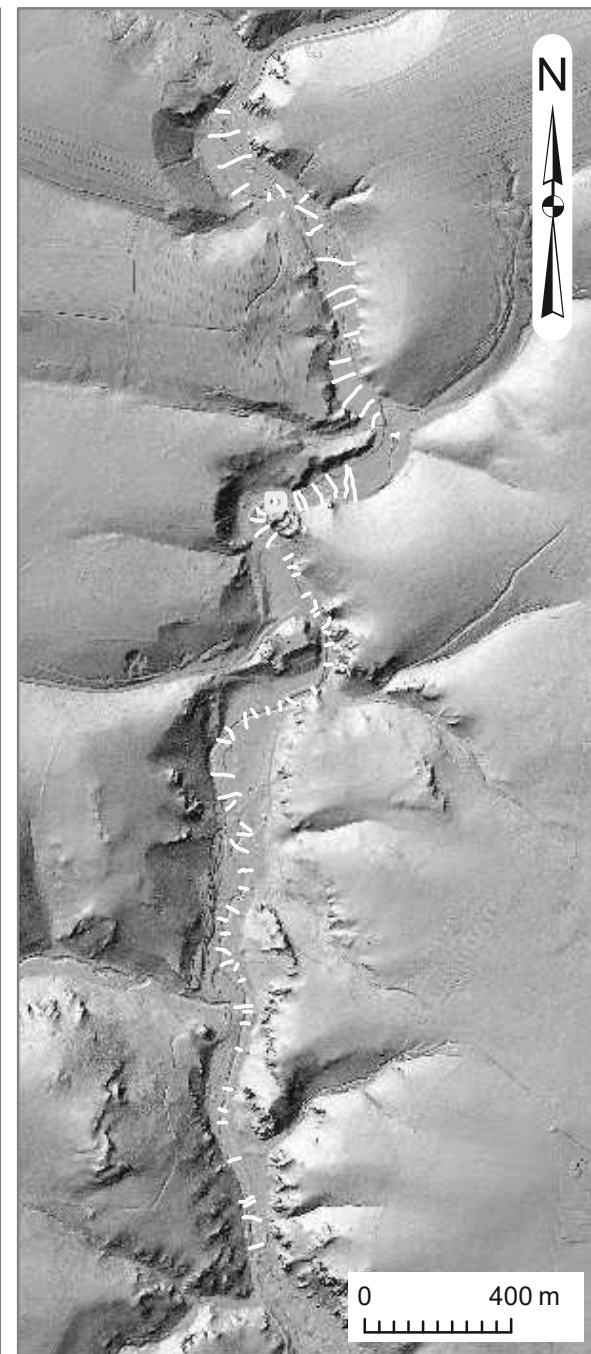

*Proile: 50* Analyses of the Prądnik riverbed shape based on archiva and contemporary data sets – old maps, LIDAR, DTMs and cross-sectional profile



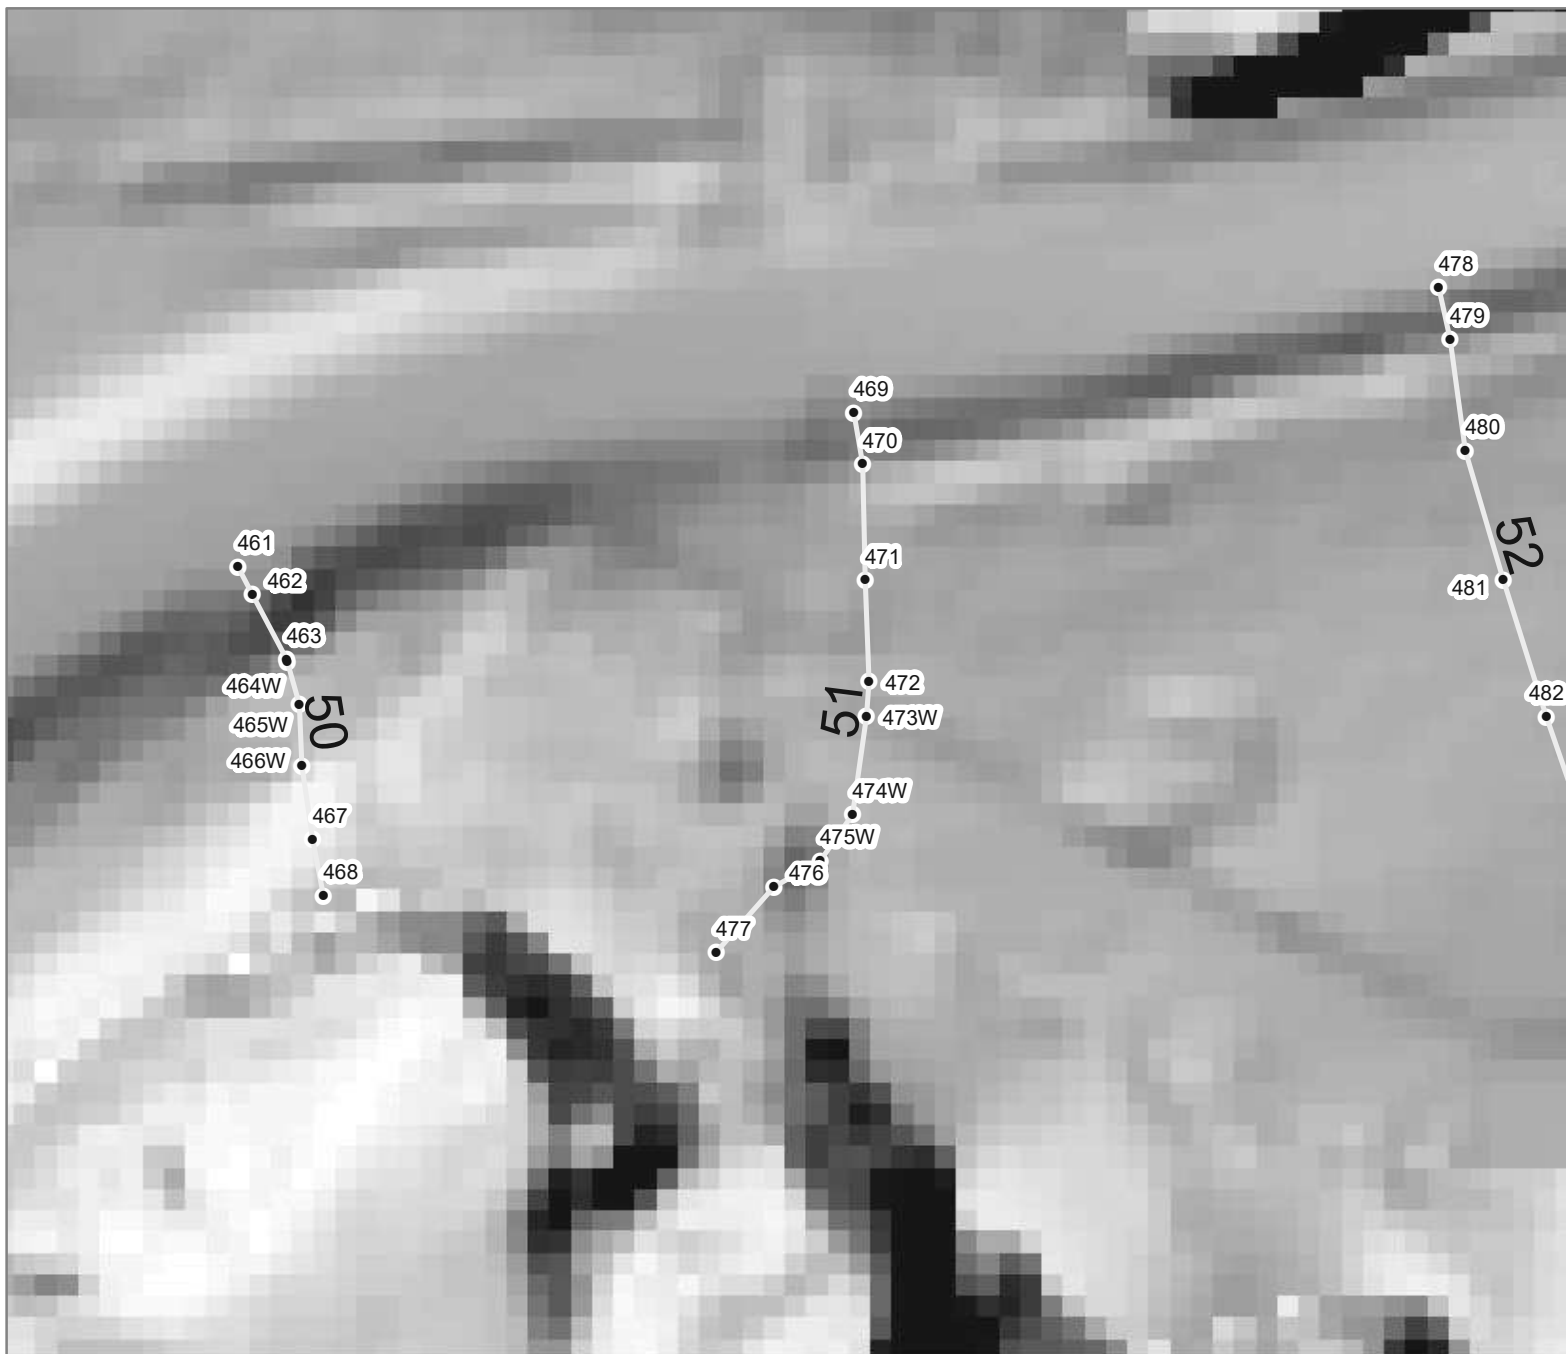

0 10 20 m

## Proile: 51

Analyses of the Prądnik riverbed shape based on archiva and contemporary data sets – old maps, LIDAR, DTMs and cross-sectional profile

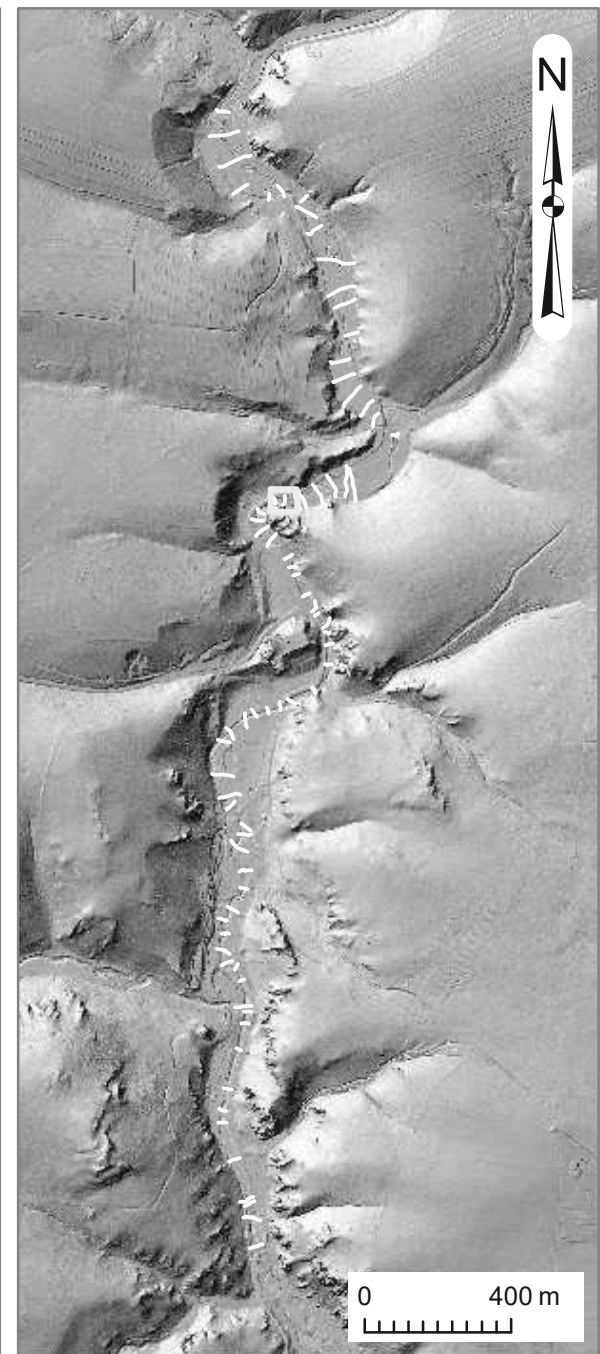

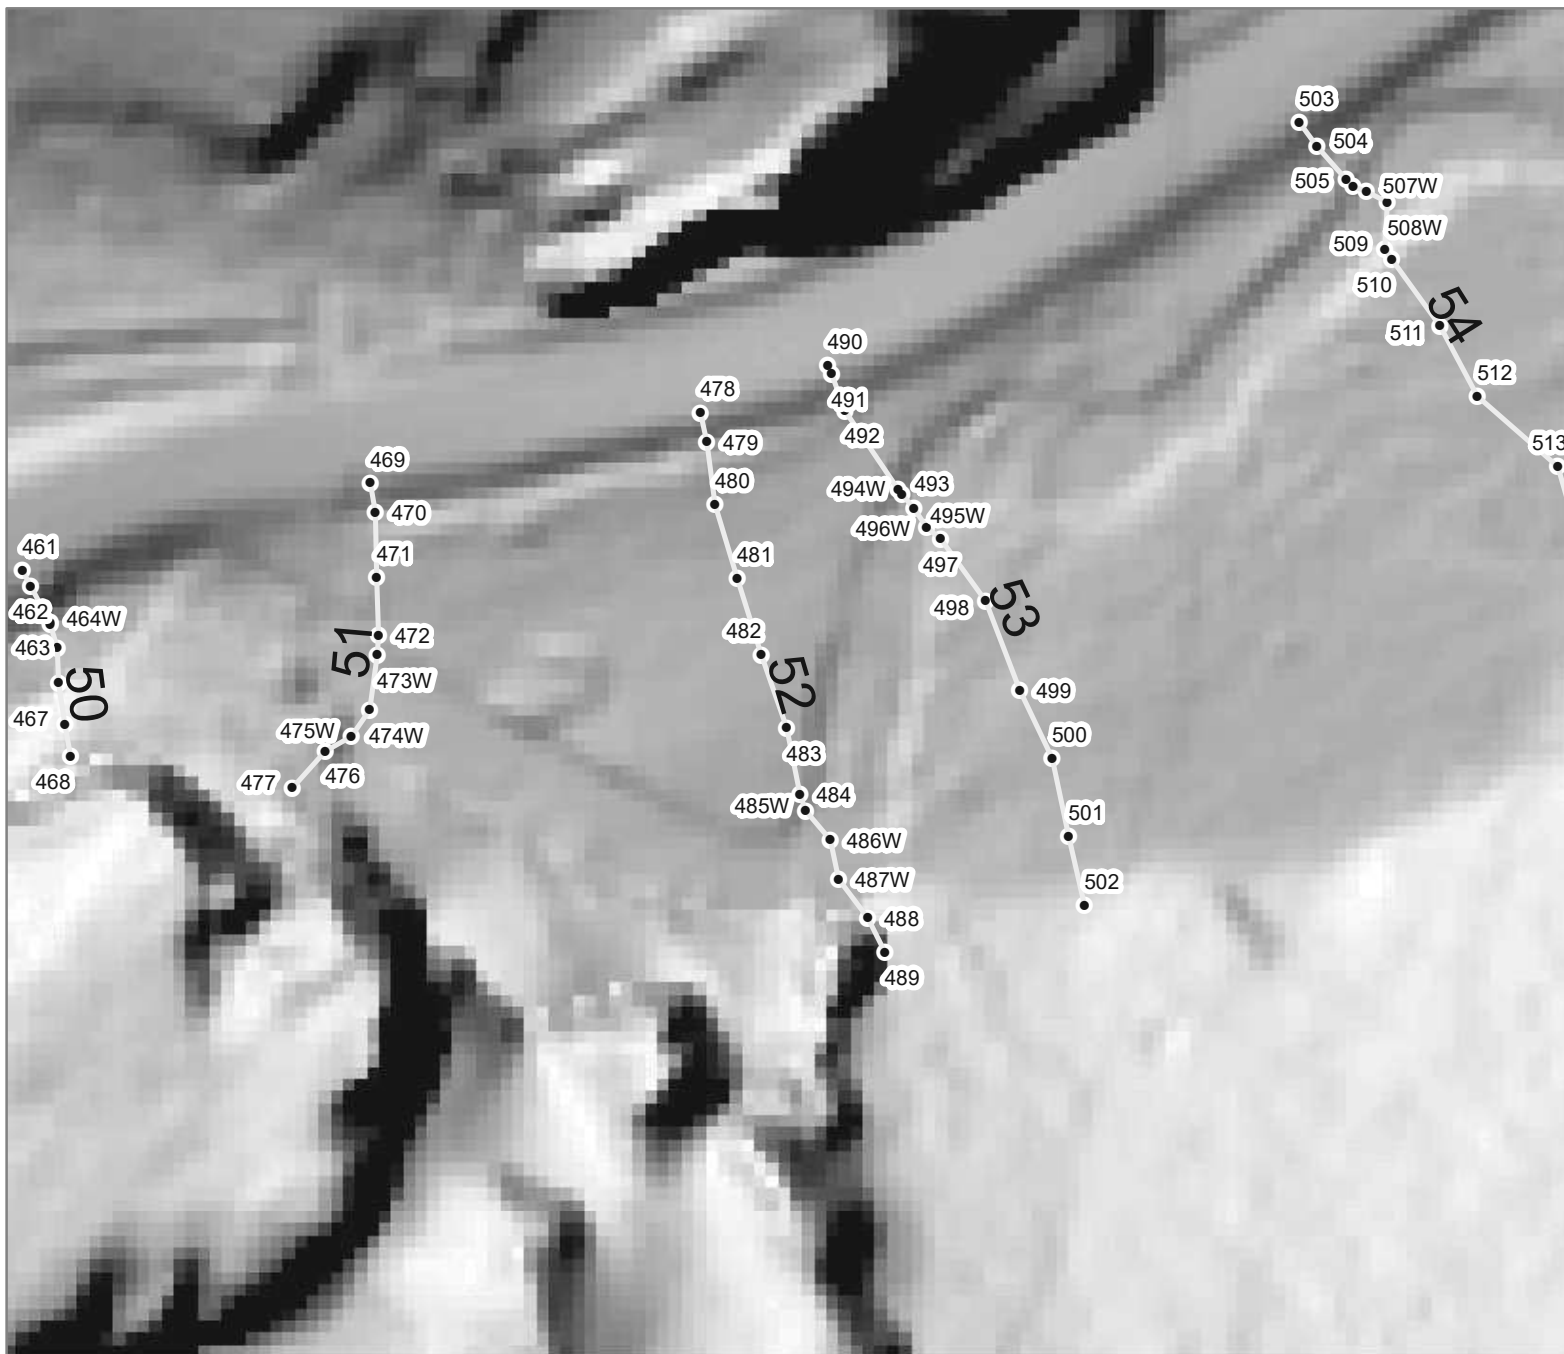

0 10 20 m

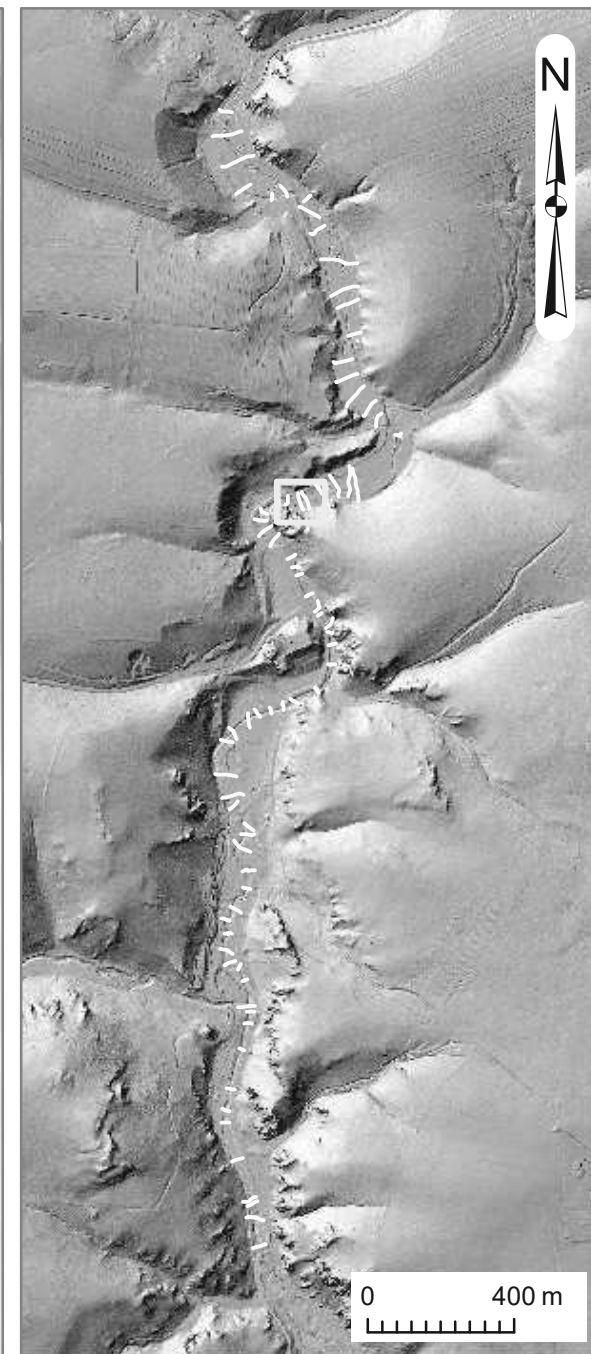

*Proile: 52* Analyses of the Prądnik riverbed shape based on archiva and contemporary data sets – old maps, LIDAR, DTMs and cross-sectional profile

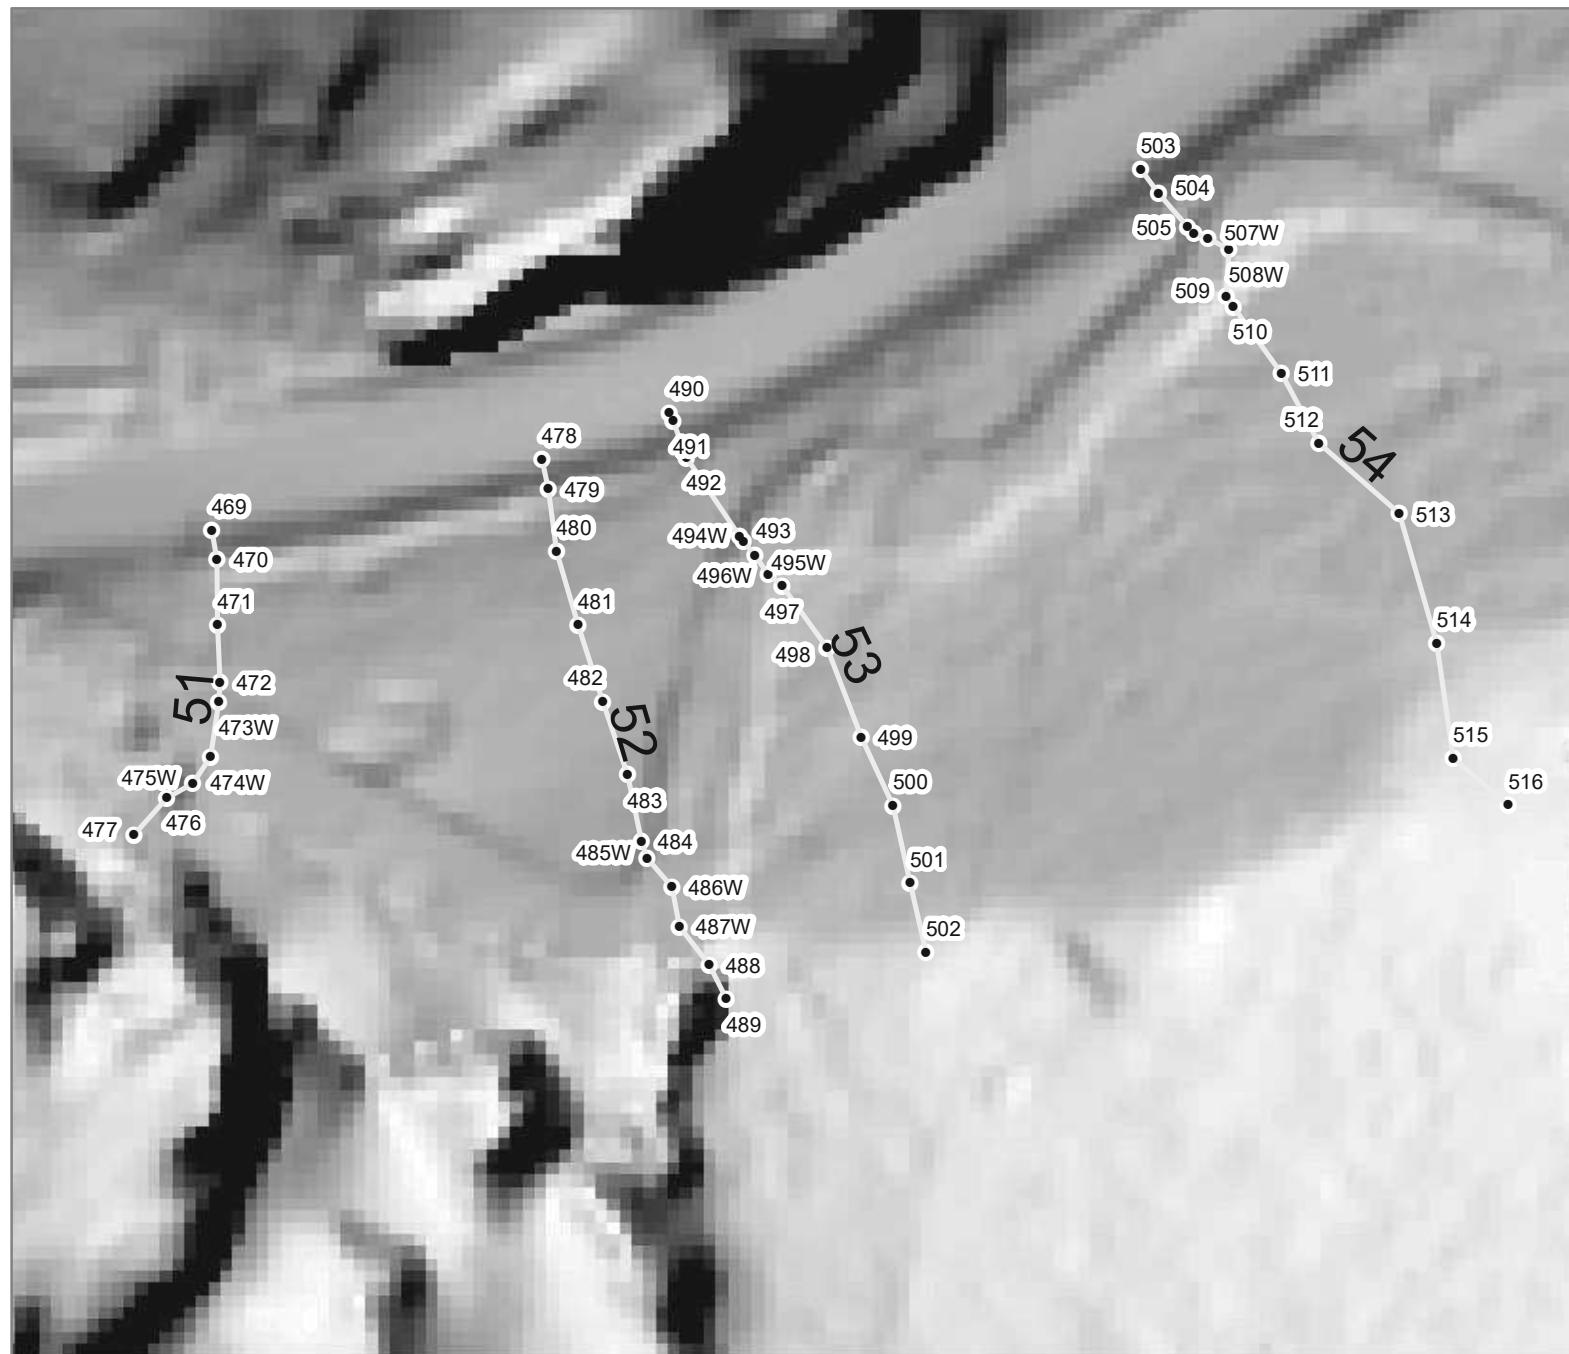

0 10 20 m

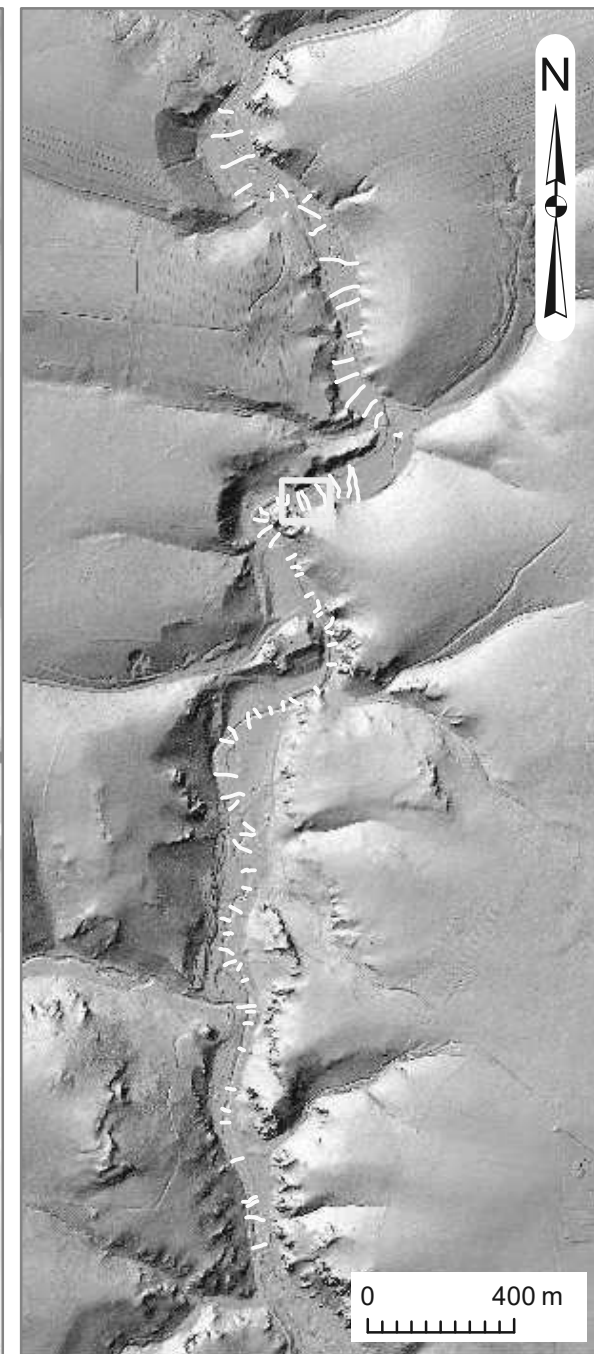

*Proile: 53* Analyses of the Prądnik riverbed shape based on archiva and contemporary data sets – old maps, LIDAR, DTMs and cross-sectional profile

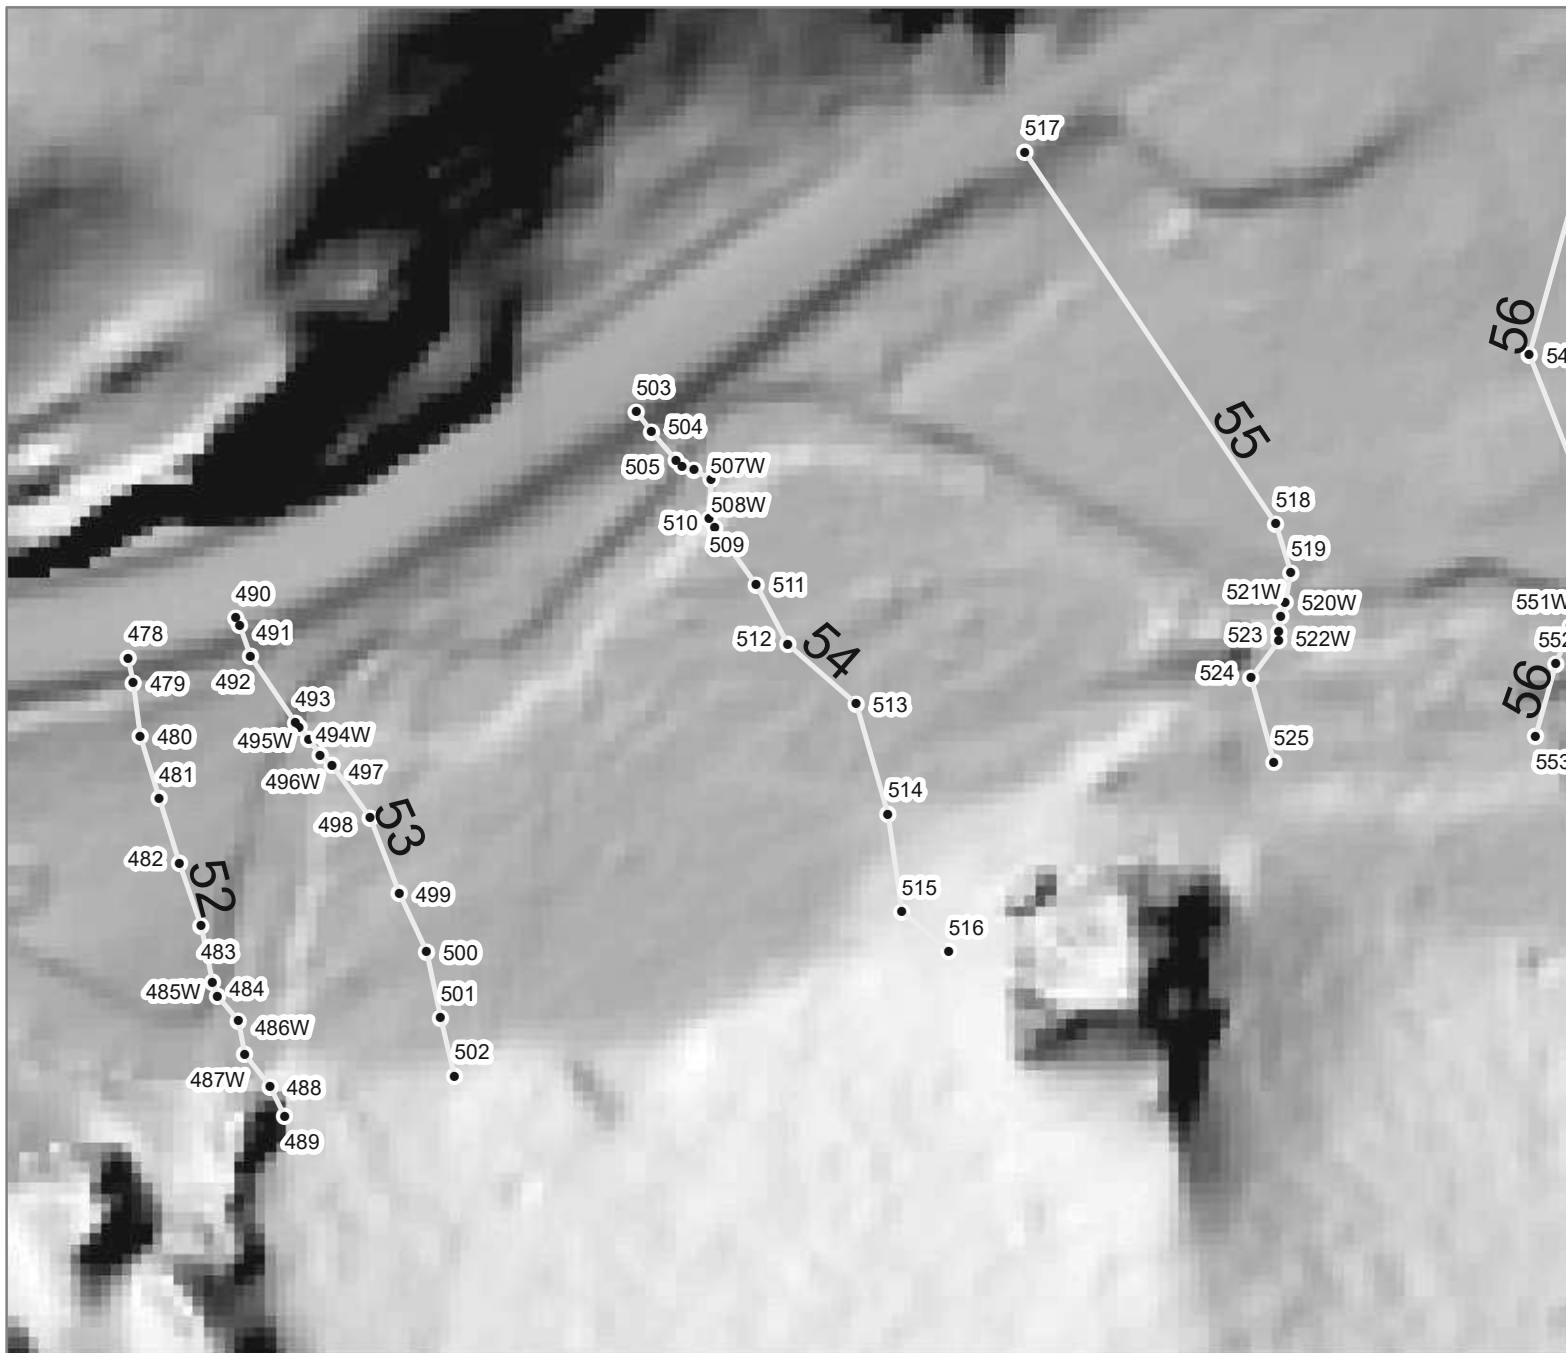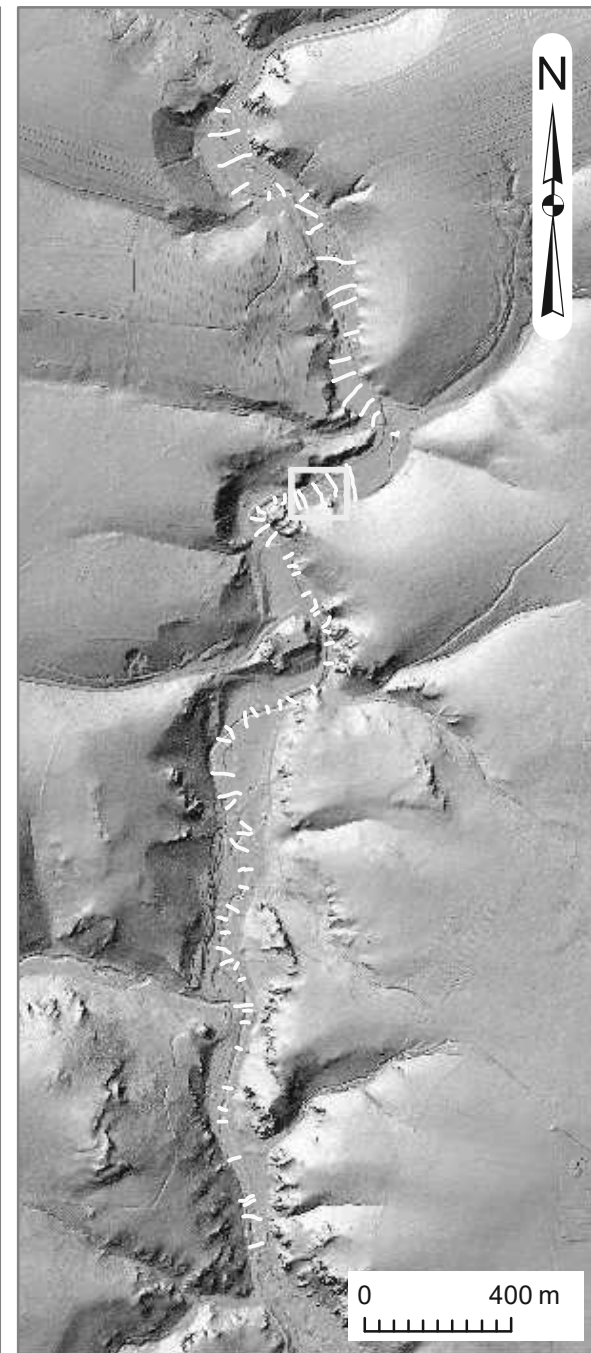

*Proile: 54* Analyses of the Prądnik riverbed shape based on archiva and contemporary data sets – old maps, LIDAR, DTMs and cross-sectional profile



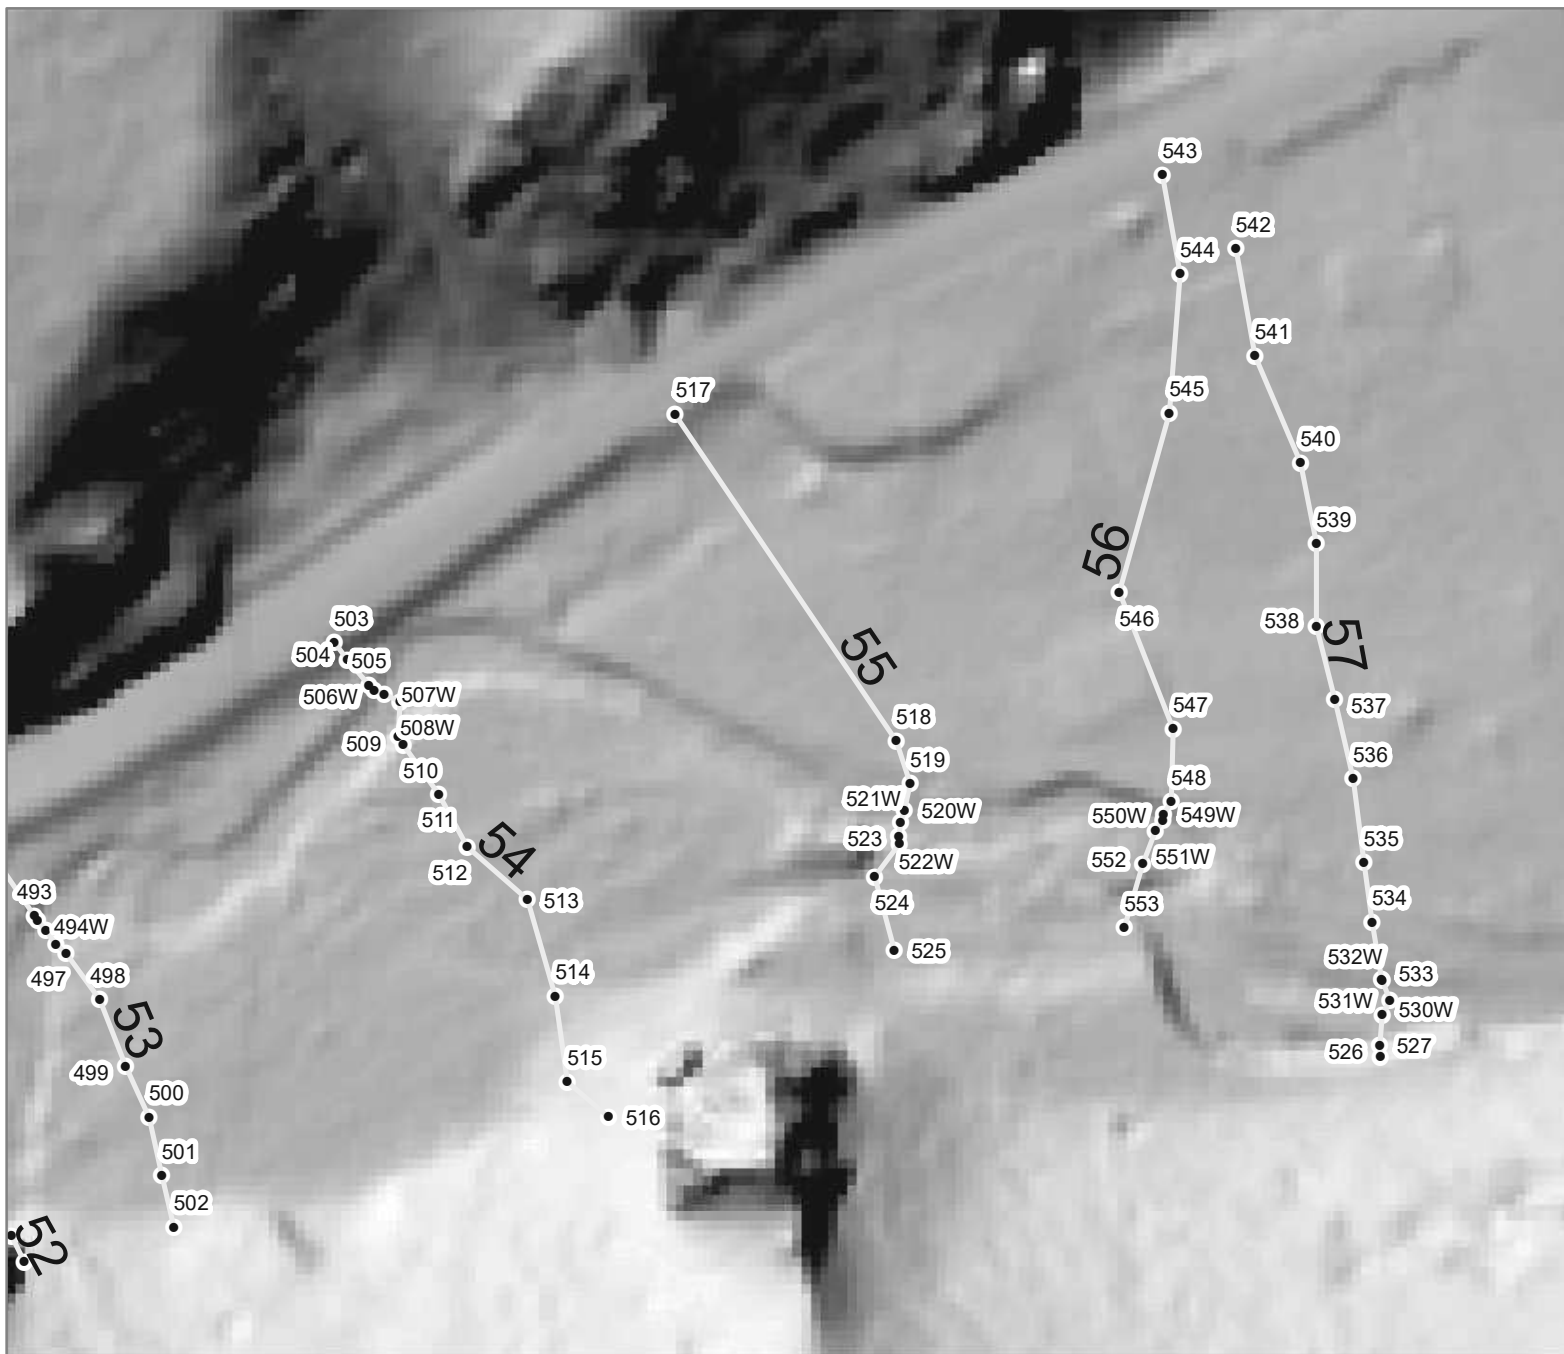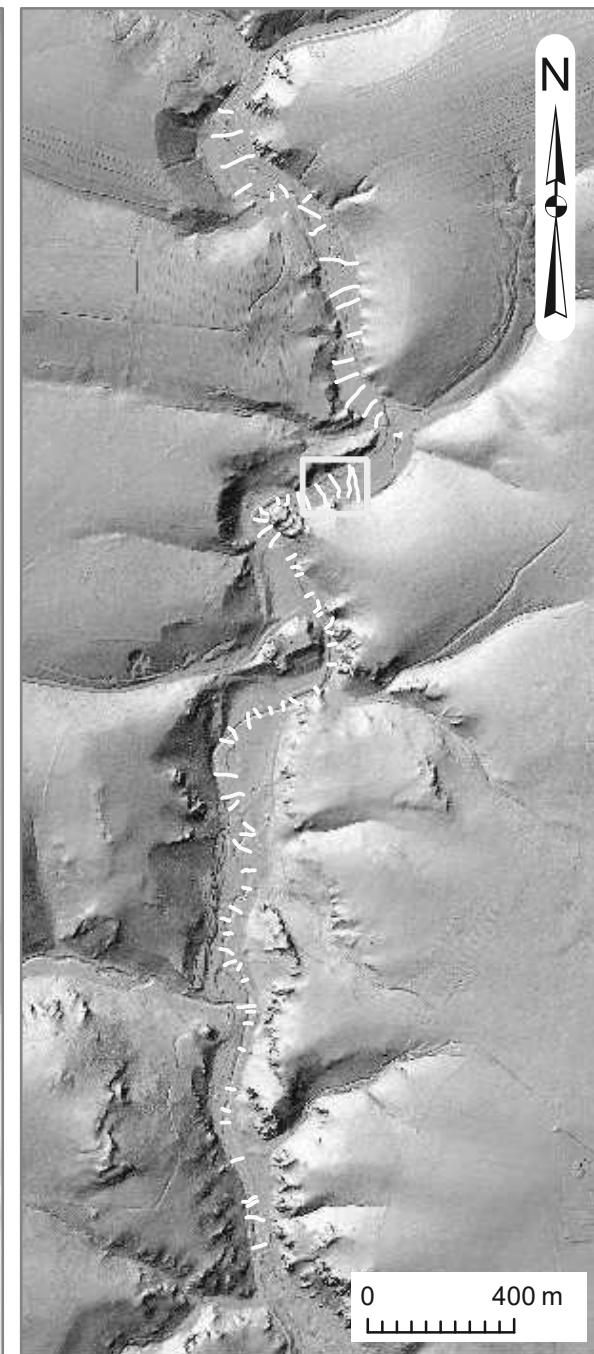

*Proile: 55* Analyses of the Prądnik riverbed shape based on archiva and contemporary data sets – old maps, LIDAR, DTMs and cross-sectional profile

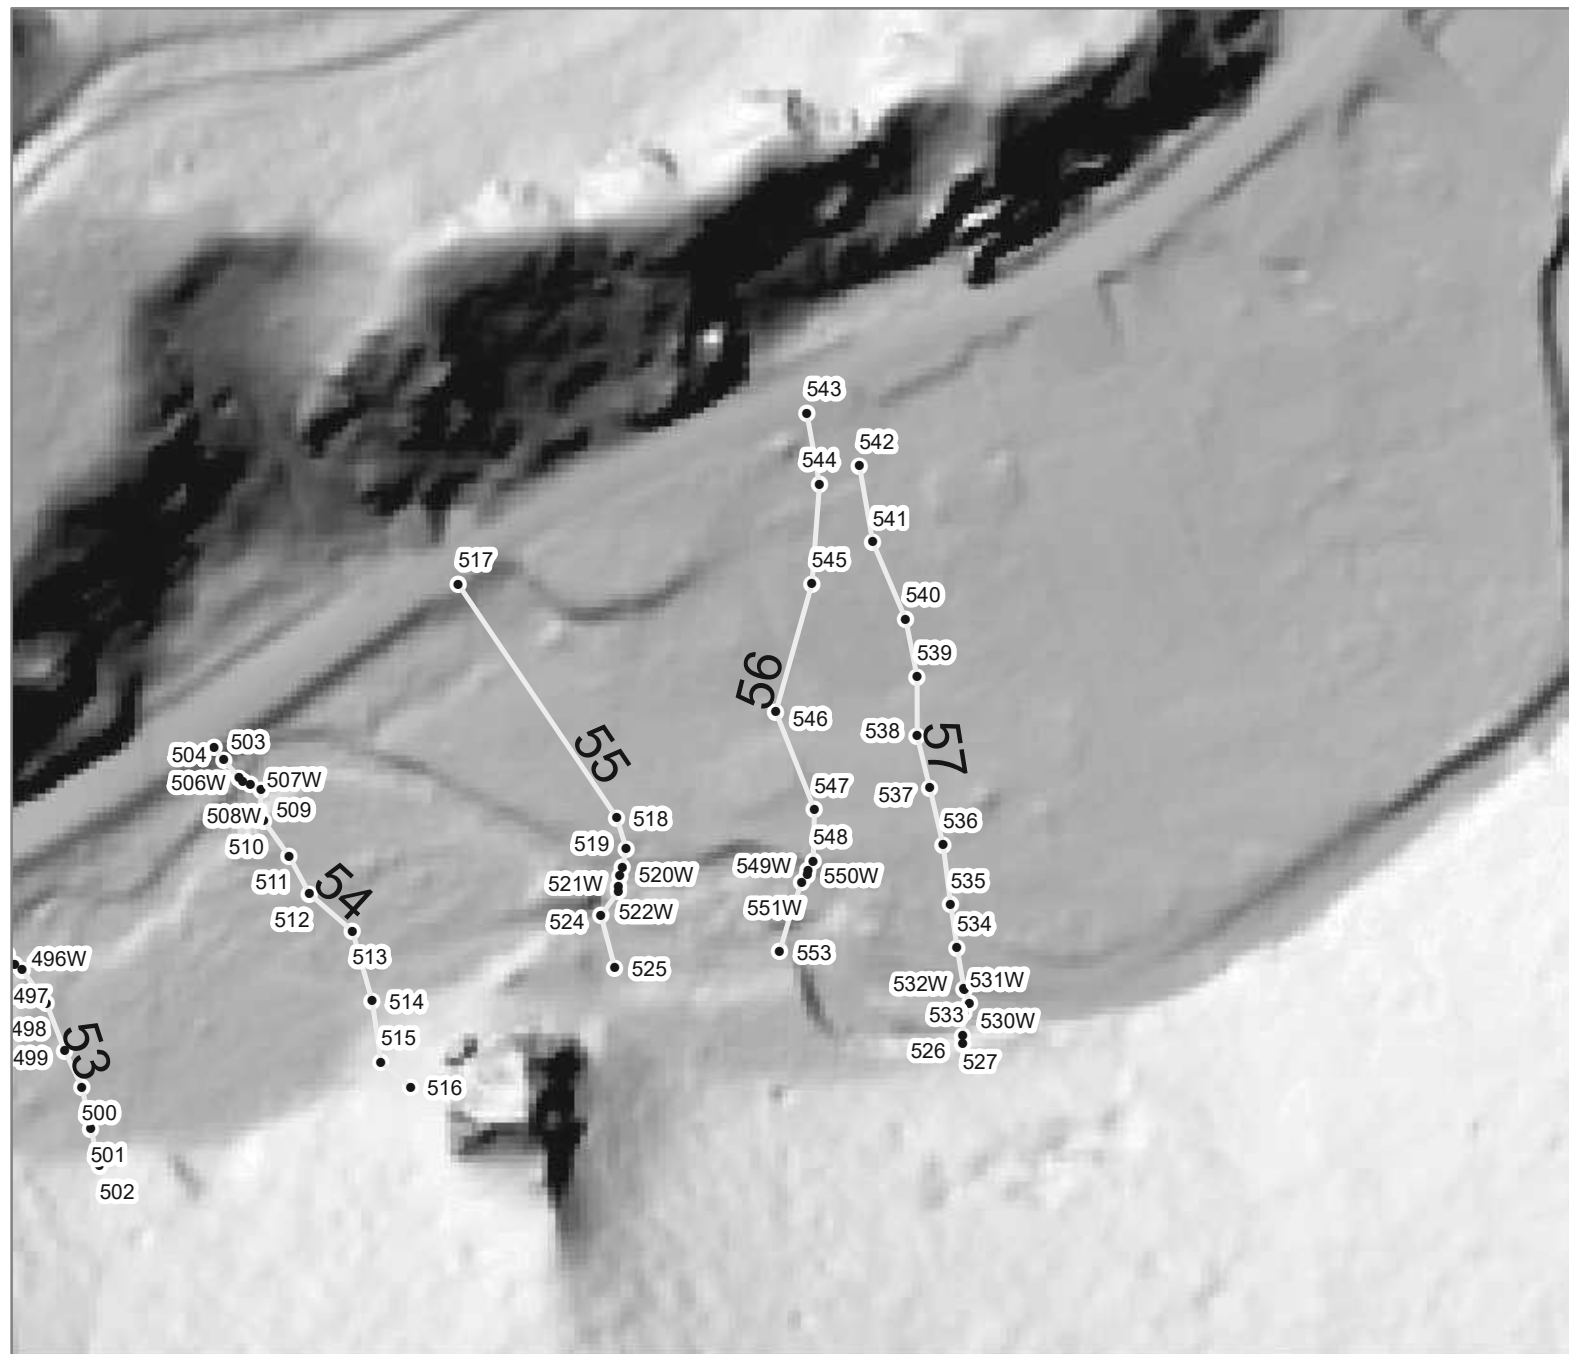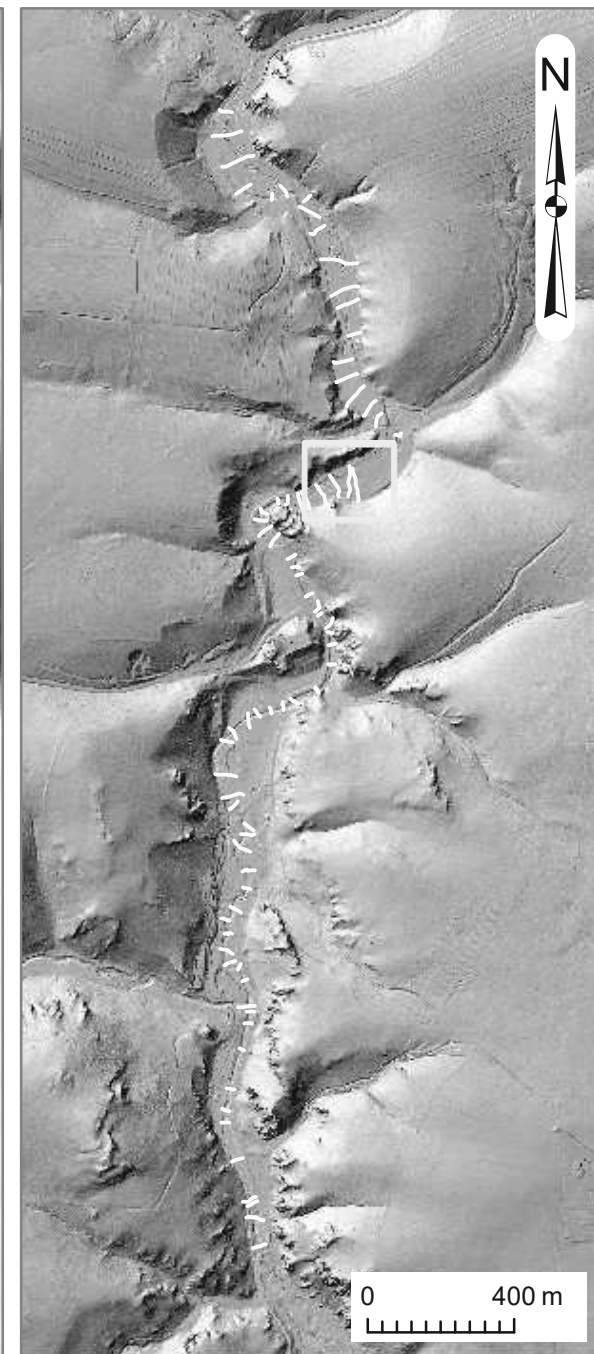

*Proile: 56* Analyses of the Prądnik riverbed shape based on archiva and contemporary data sets – old maps, LIDAR, DTMs and cross-sectional profile



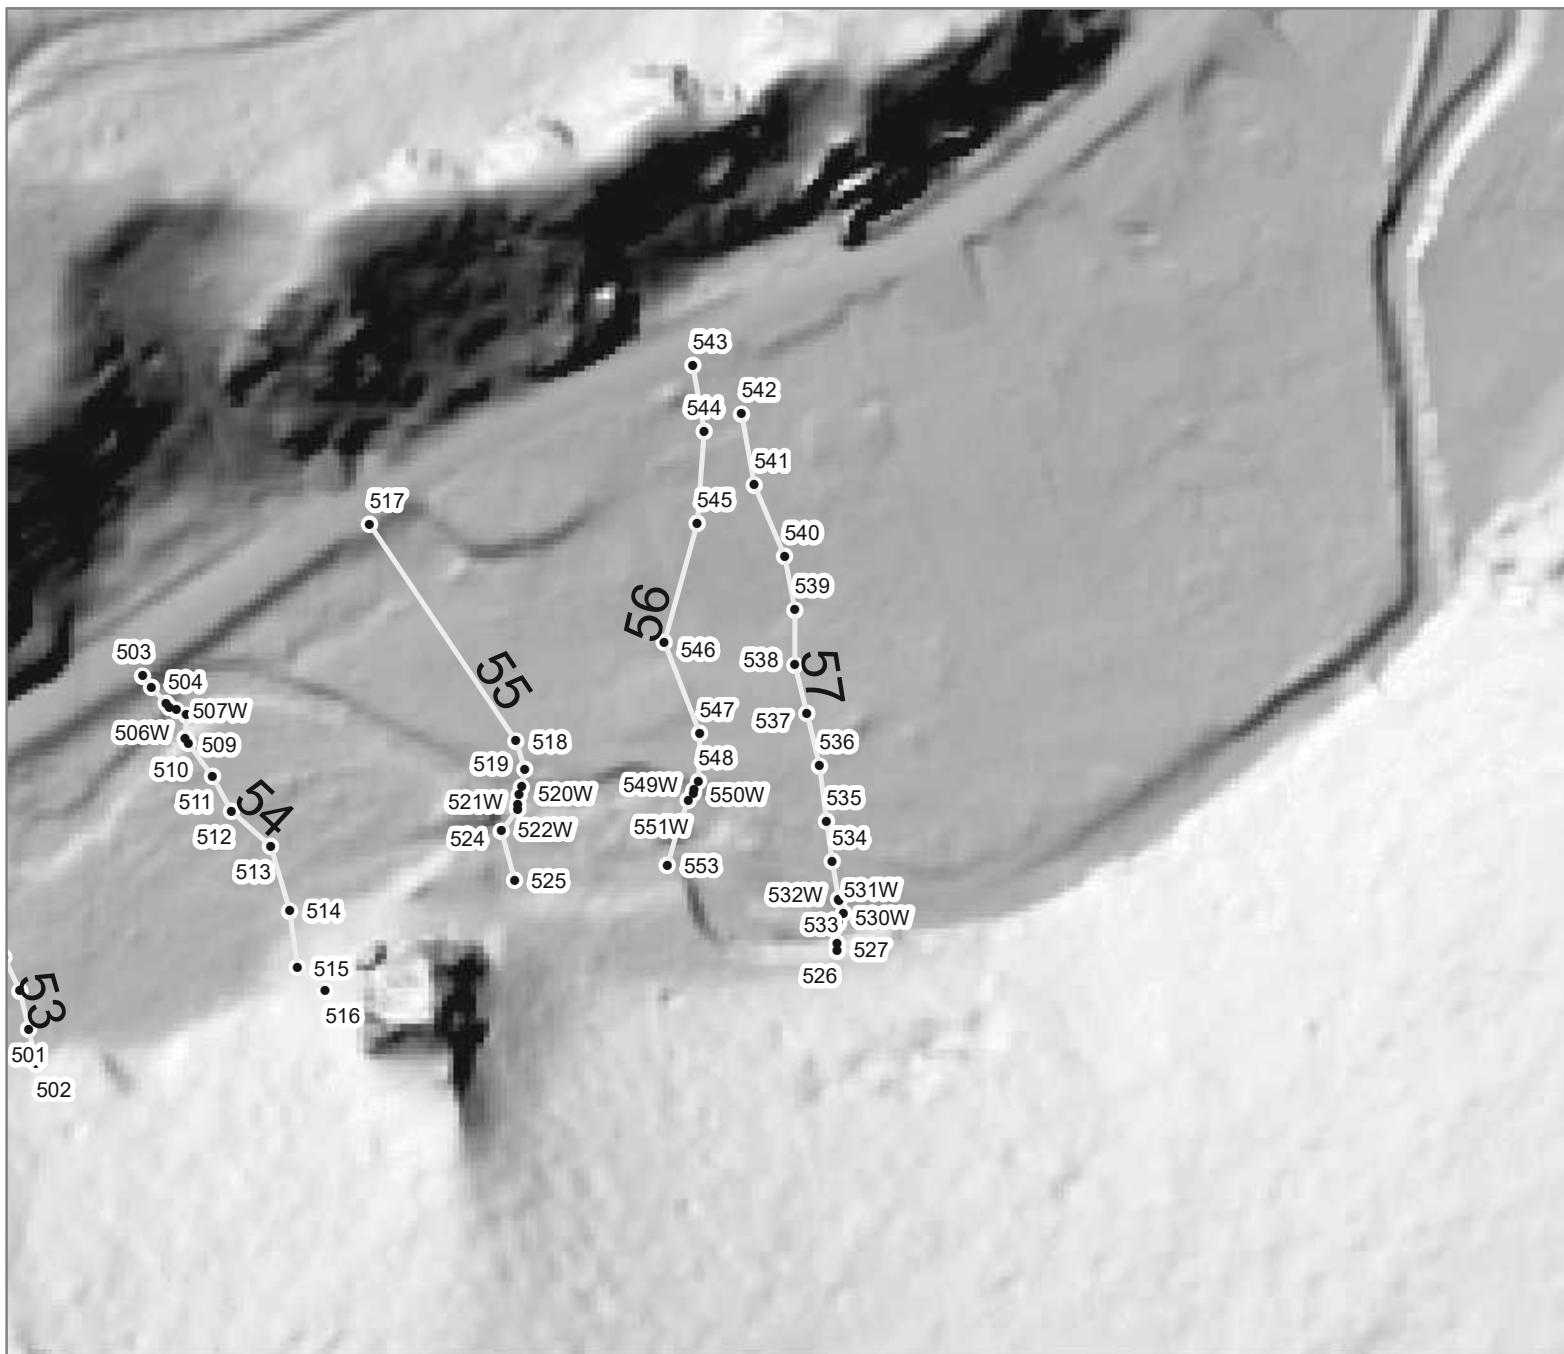

0 10 20 m

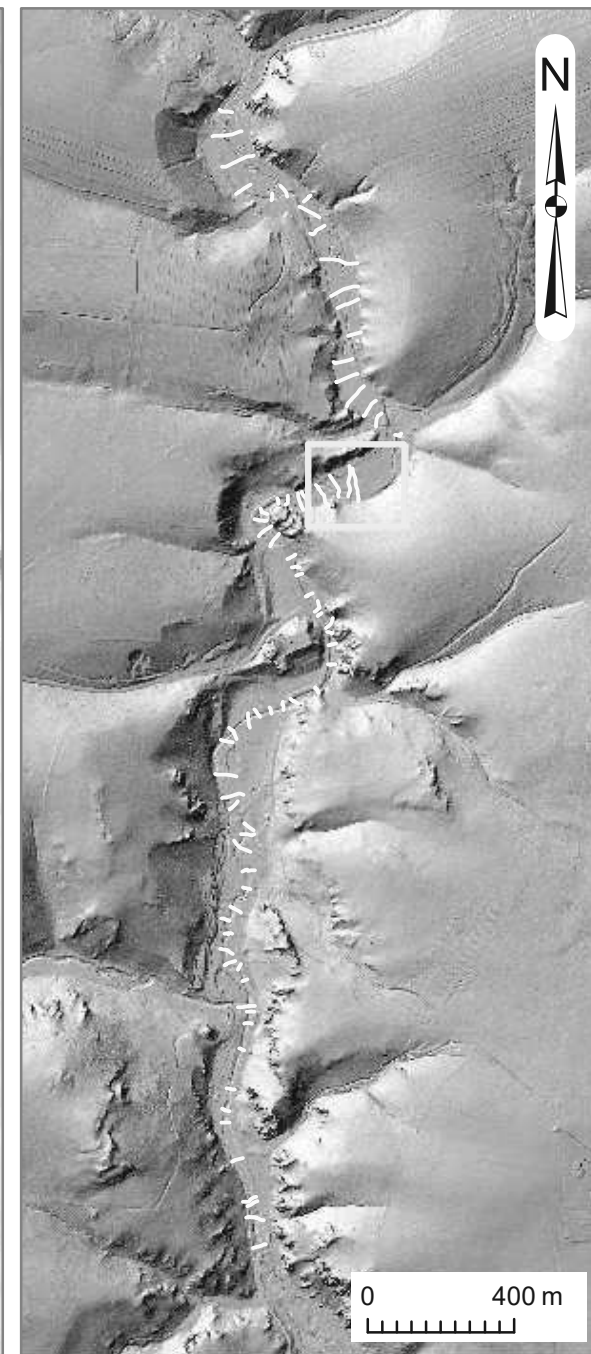

0 400 m

*Proile: 57* Analyses of the Prądnik riverbed shape based on archiva and contemporary data sets – old maps, LIDAR, DTMs and cross-sectional profile

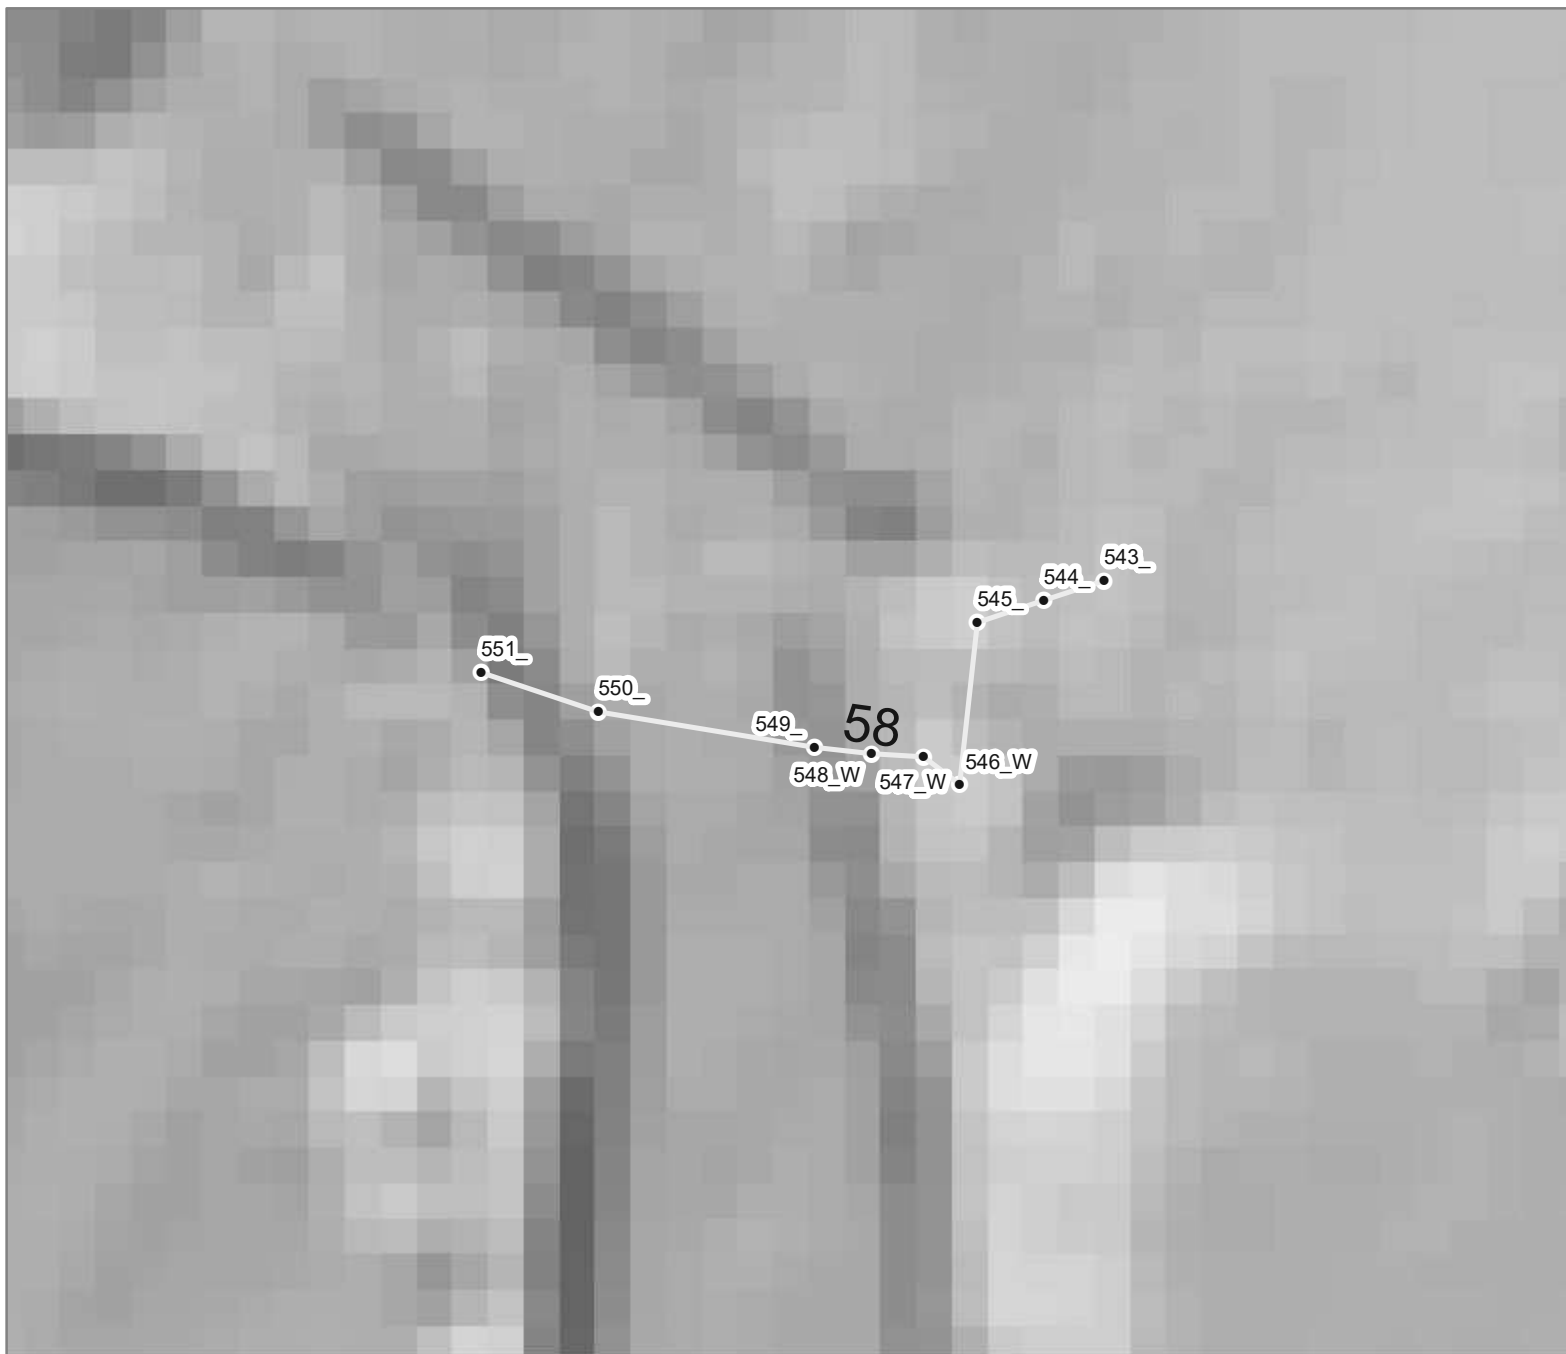

0 10 20 m

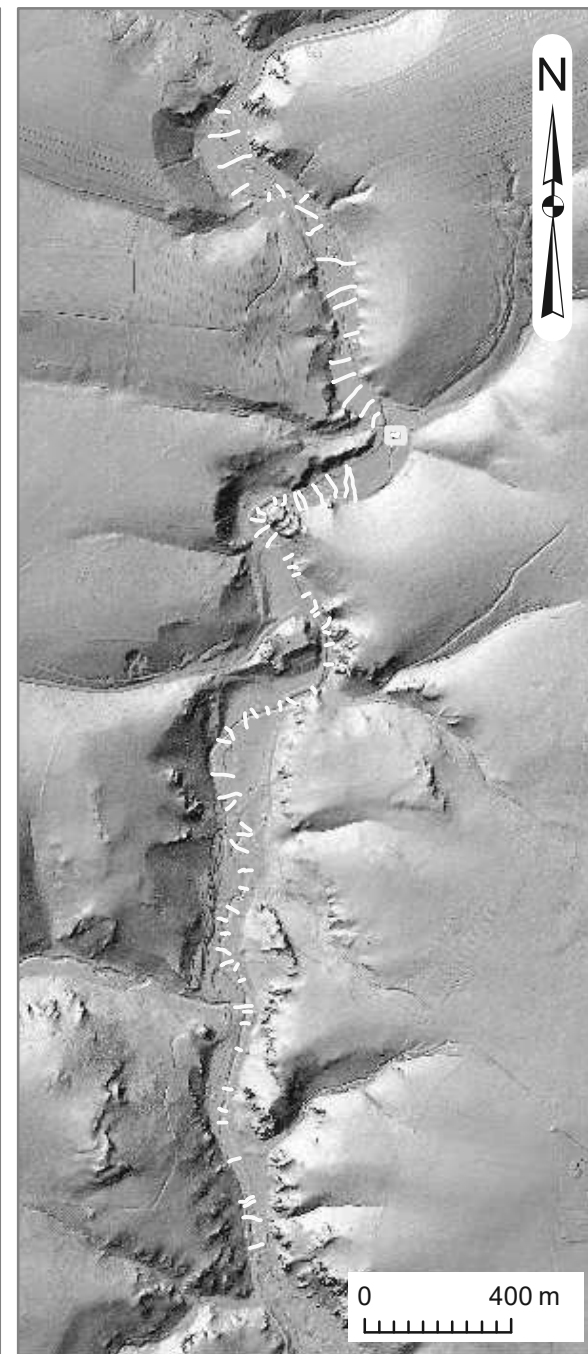

0 400 m

*Proile: 58* Analyses of the Prądnik riverbed shape based on archiva and contemporary data sets – old maps, LIDAR, DTMs and cross-sectional profile

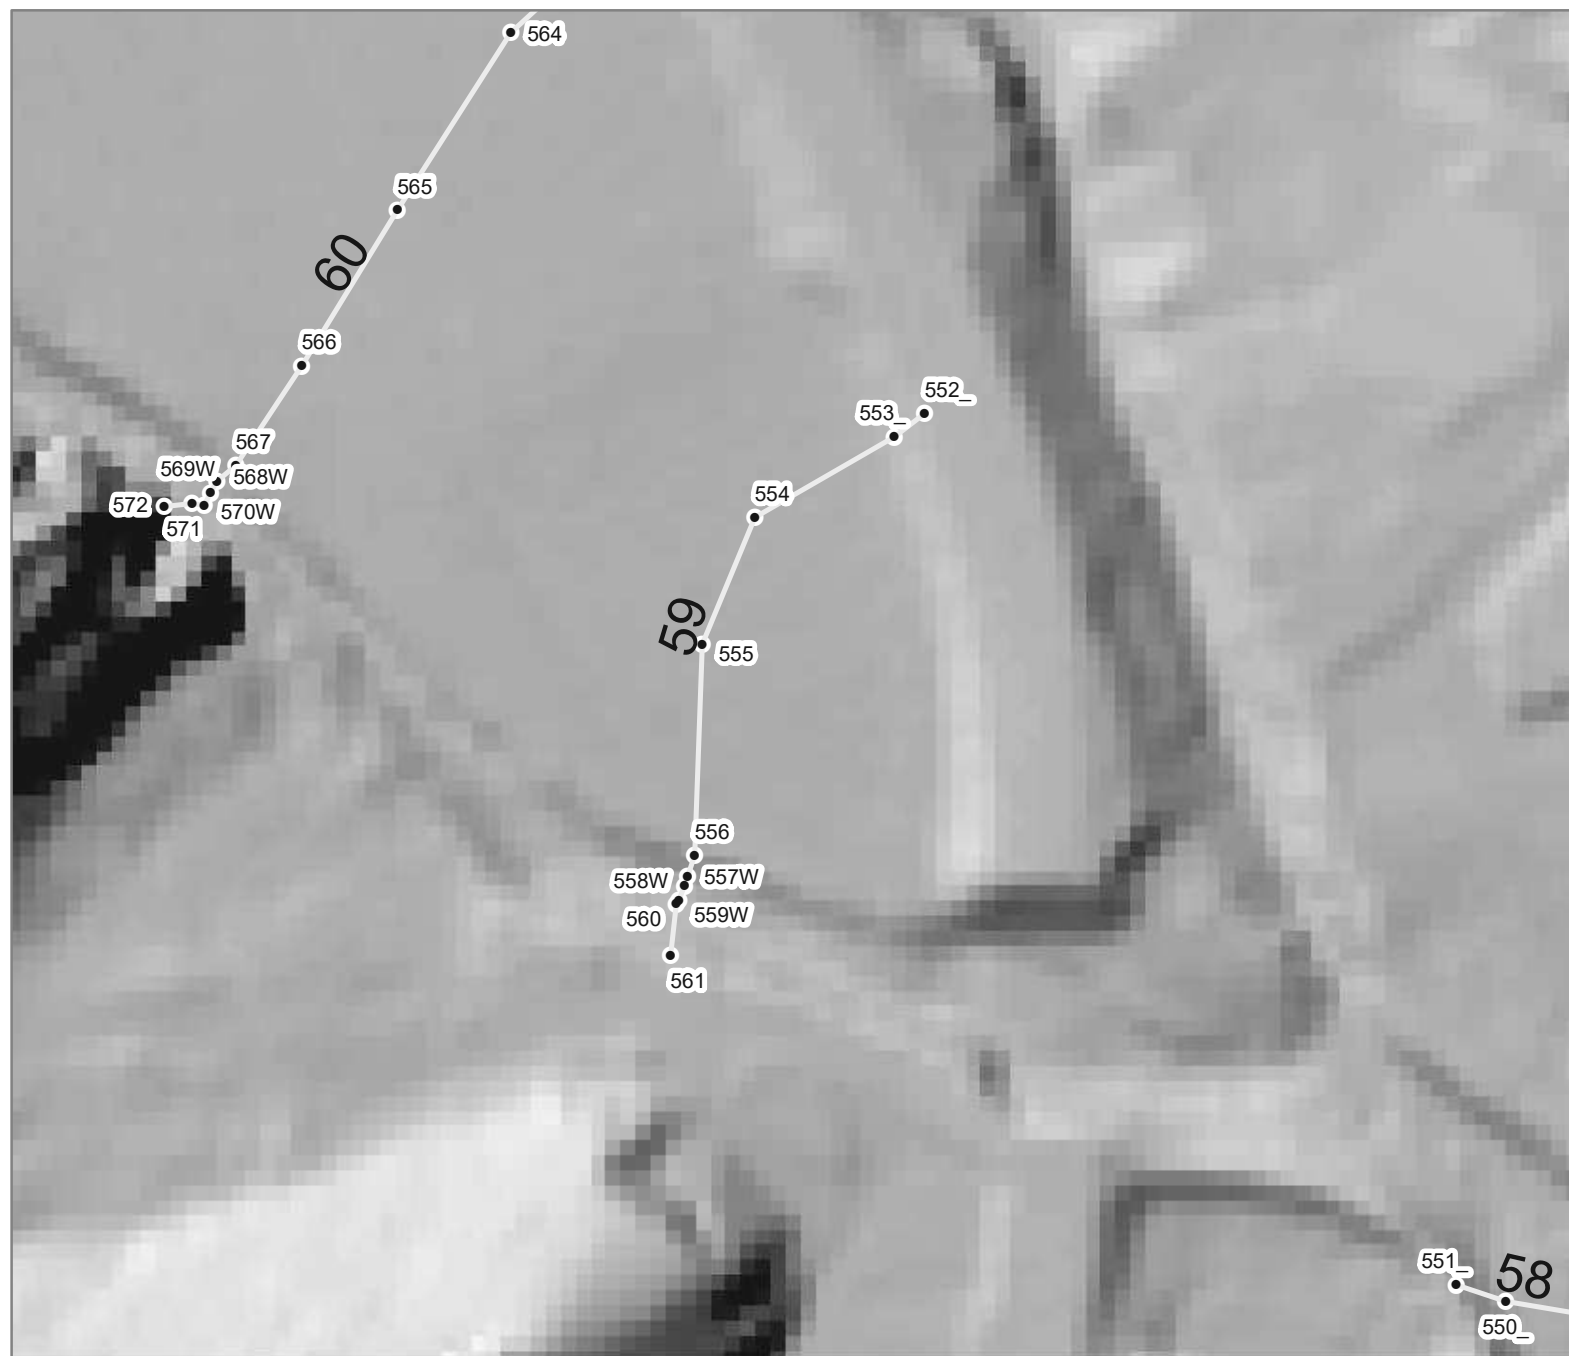

0 10 20 m

*Proile: 59* Analyses of the Prądnik riverbed shape based on archiva and contemporary data sets – old maps, LIDAR, DTMs and cross-sectional profile

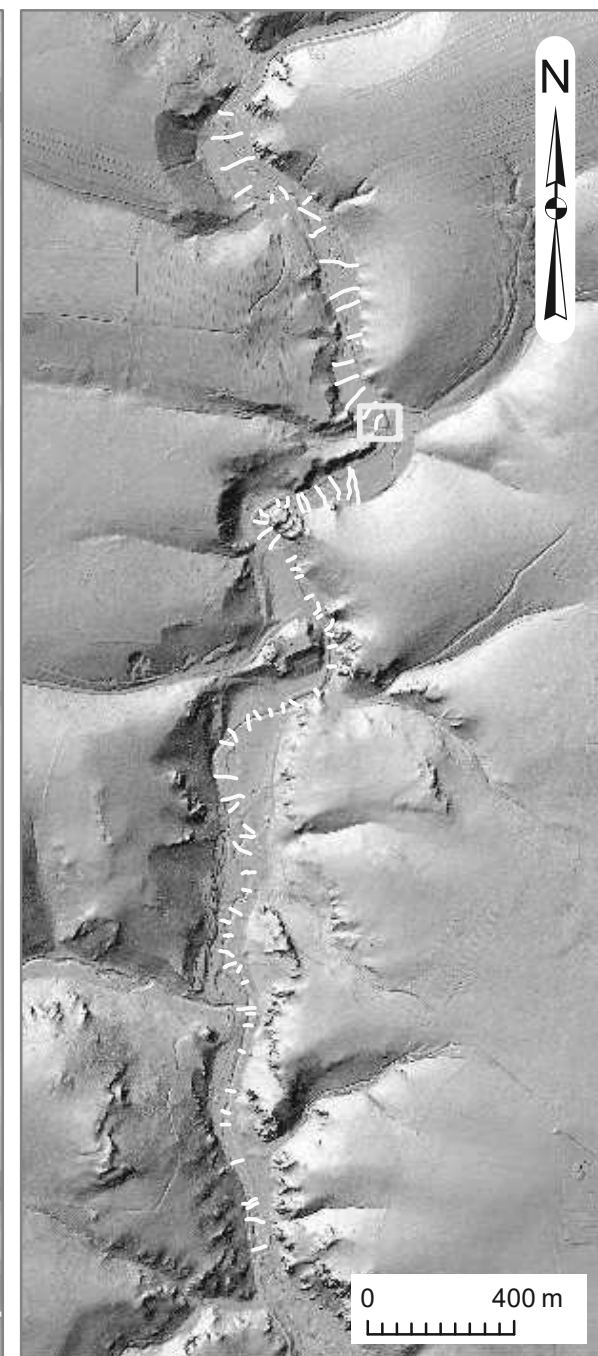

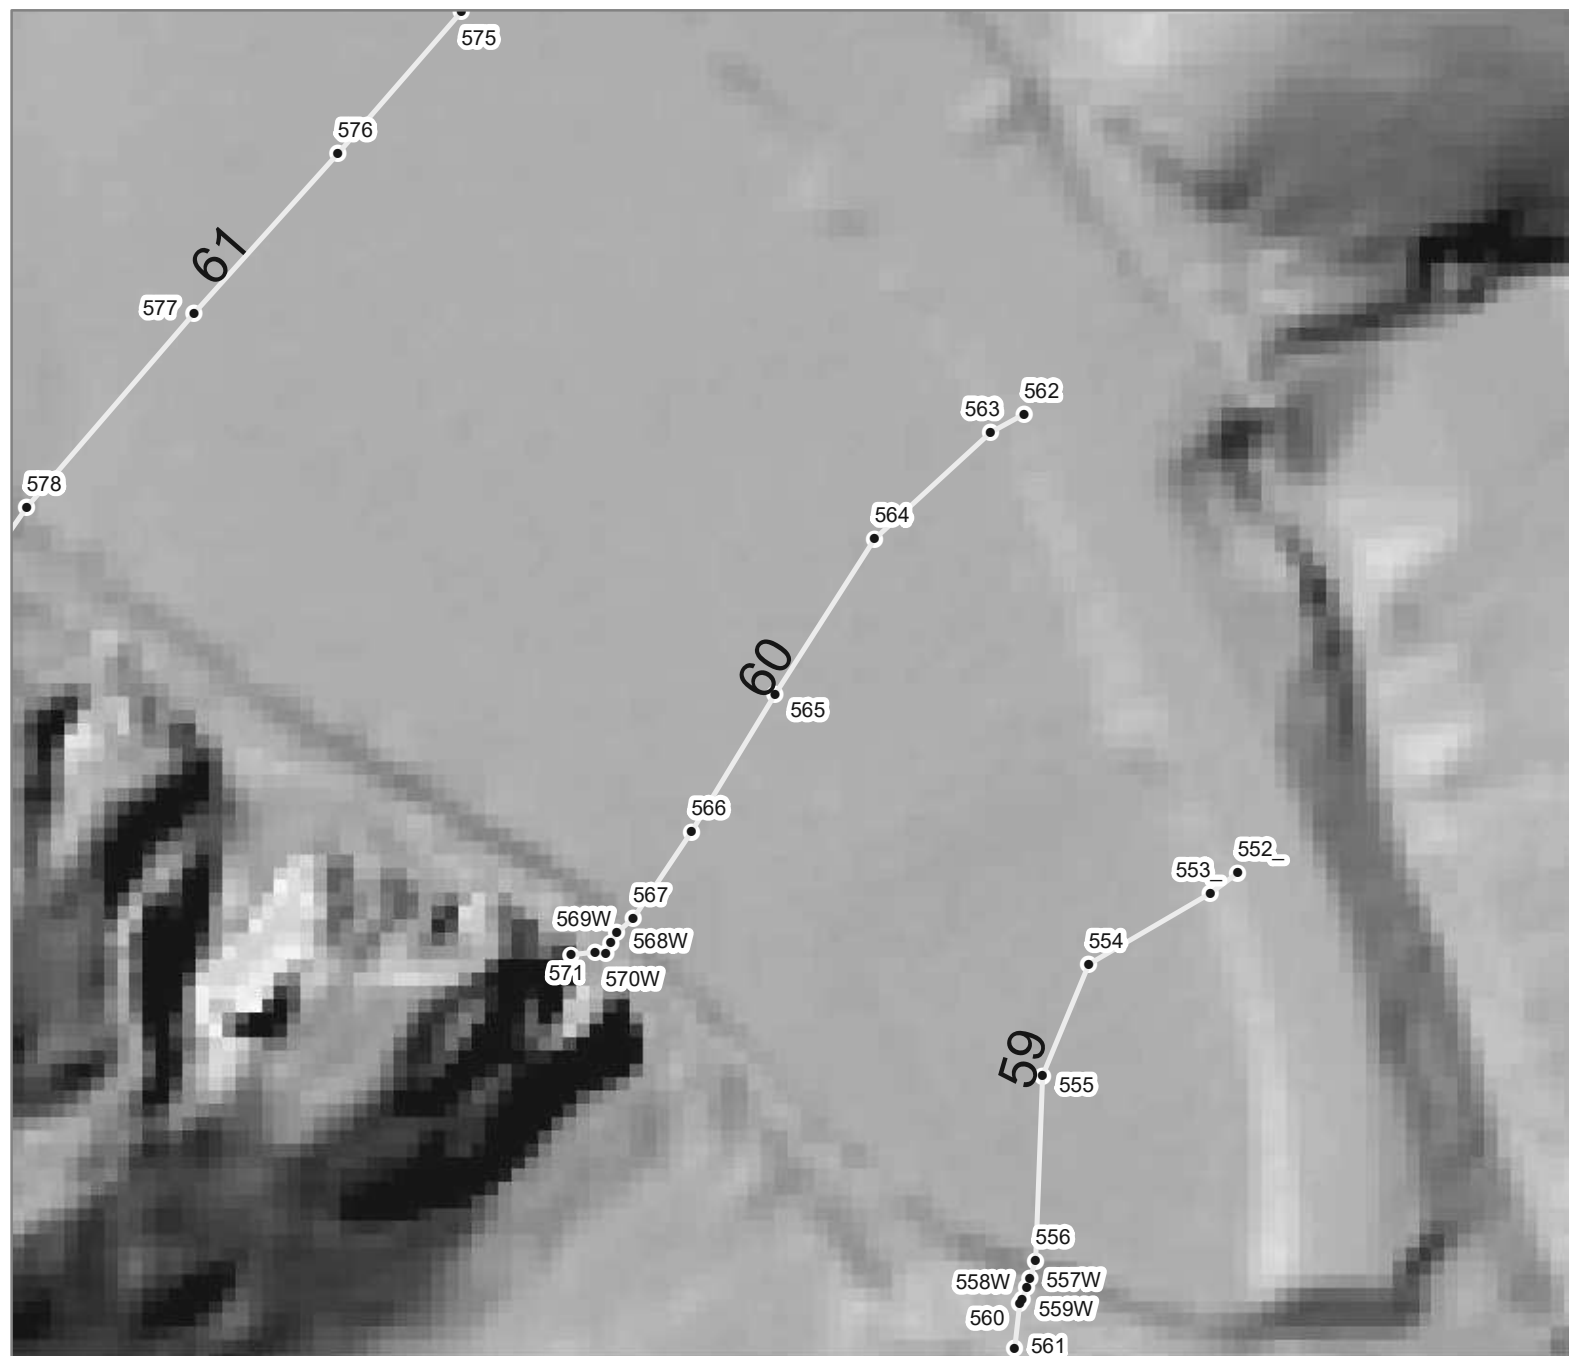

0 10 20 m

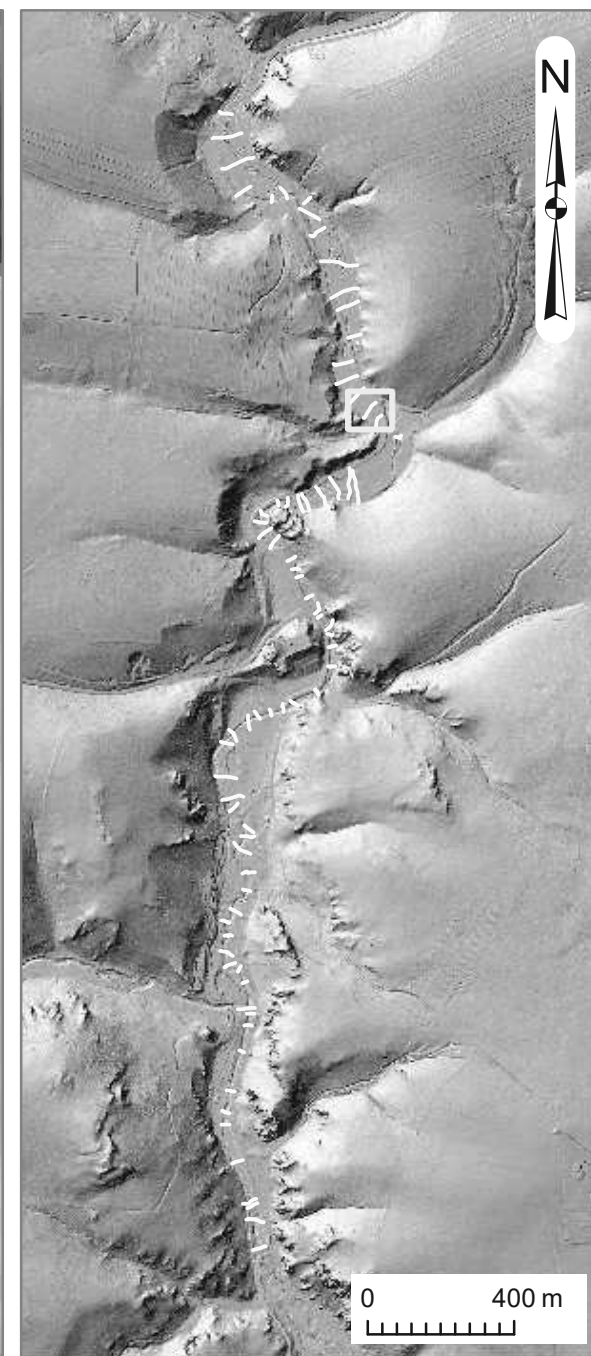

0 400 m

*Proile: 60* Analyses of the Prądnik riverbed shape based on archiva and contemporary data sets – old maps, LIDAR, DTMs and cross-sectional profile

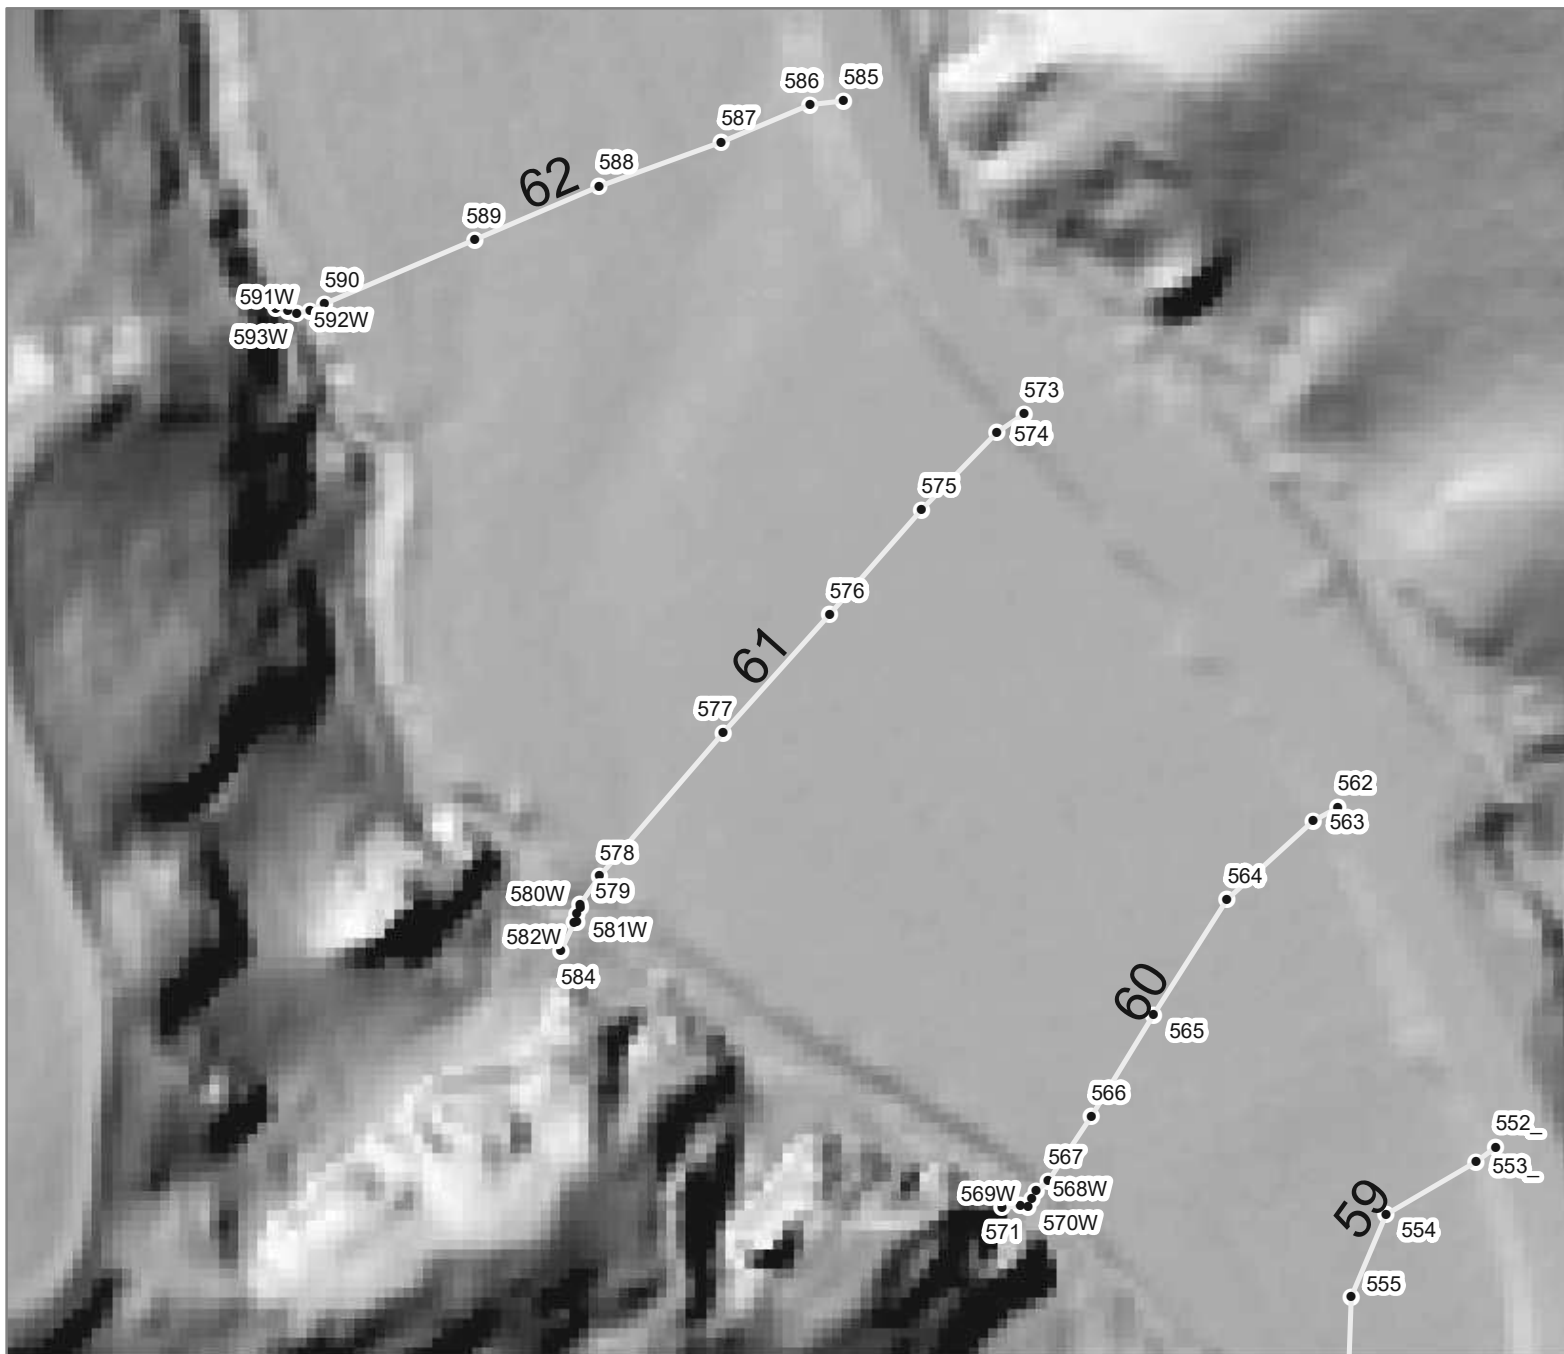

0 10 20 m

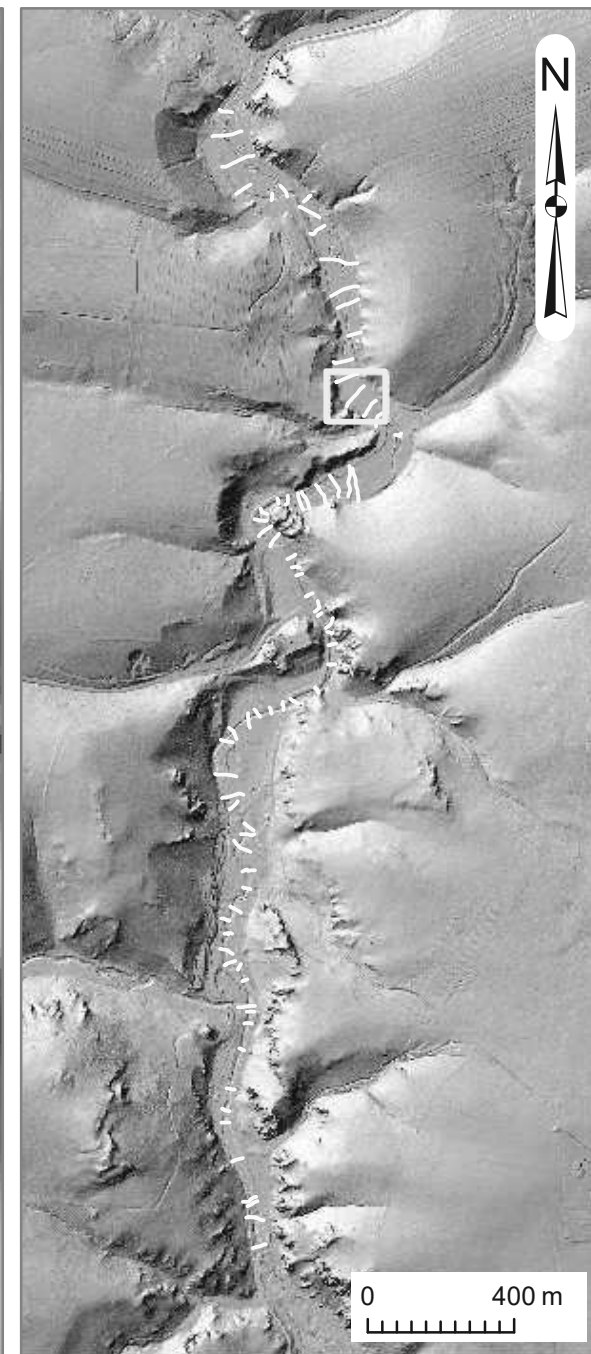

0 400 m

*Proile: 61*

Analyses of the Prądnik riverbed shape based on archiva and contemporary data sets – old maps, LIDAR, DTMs and cross-sectional profile



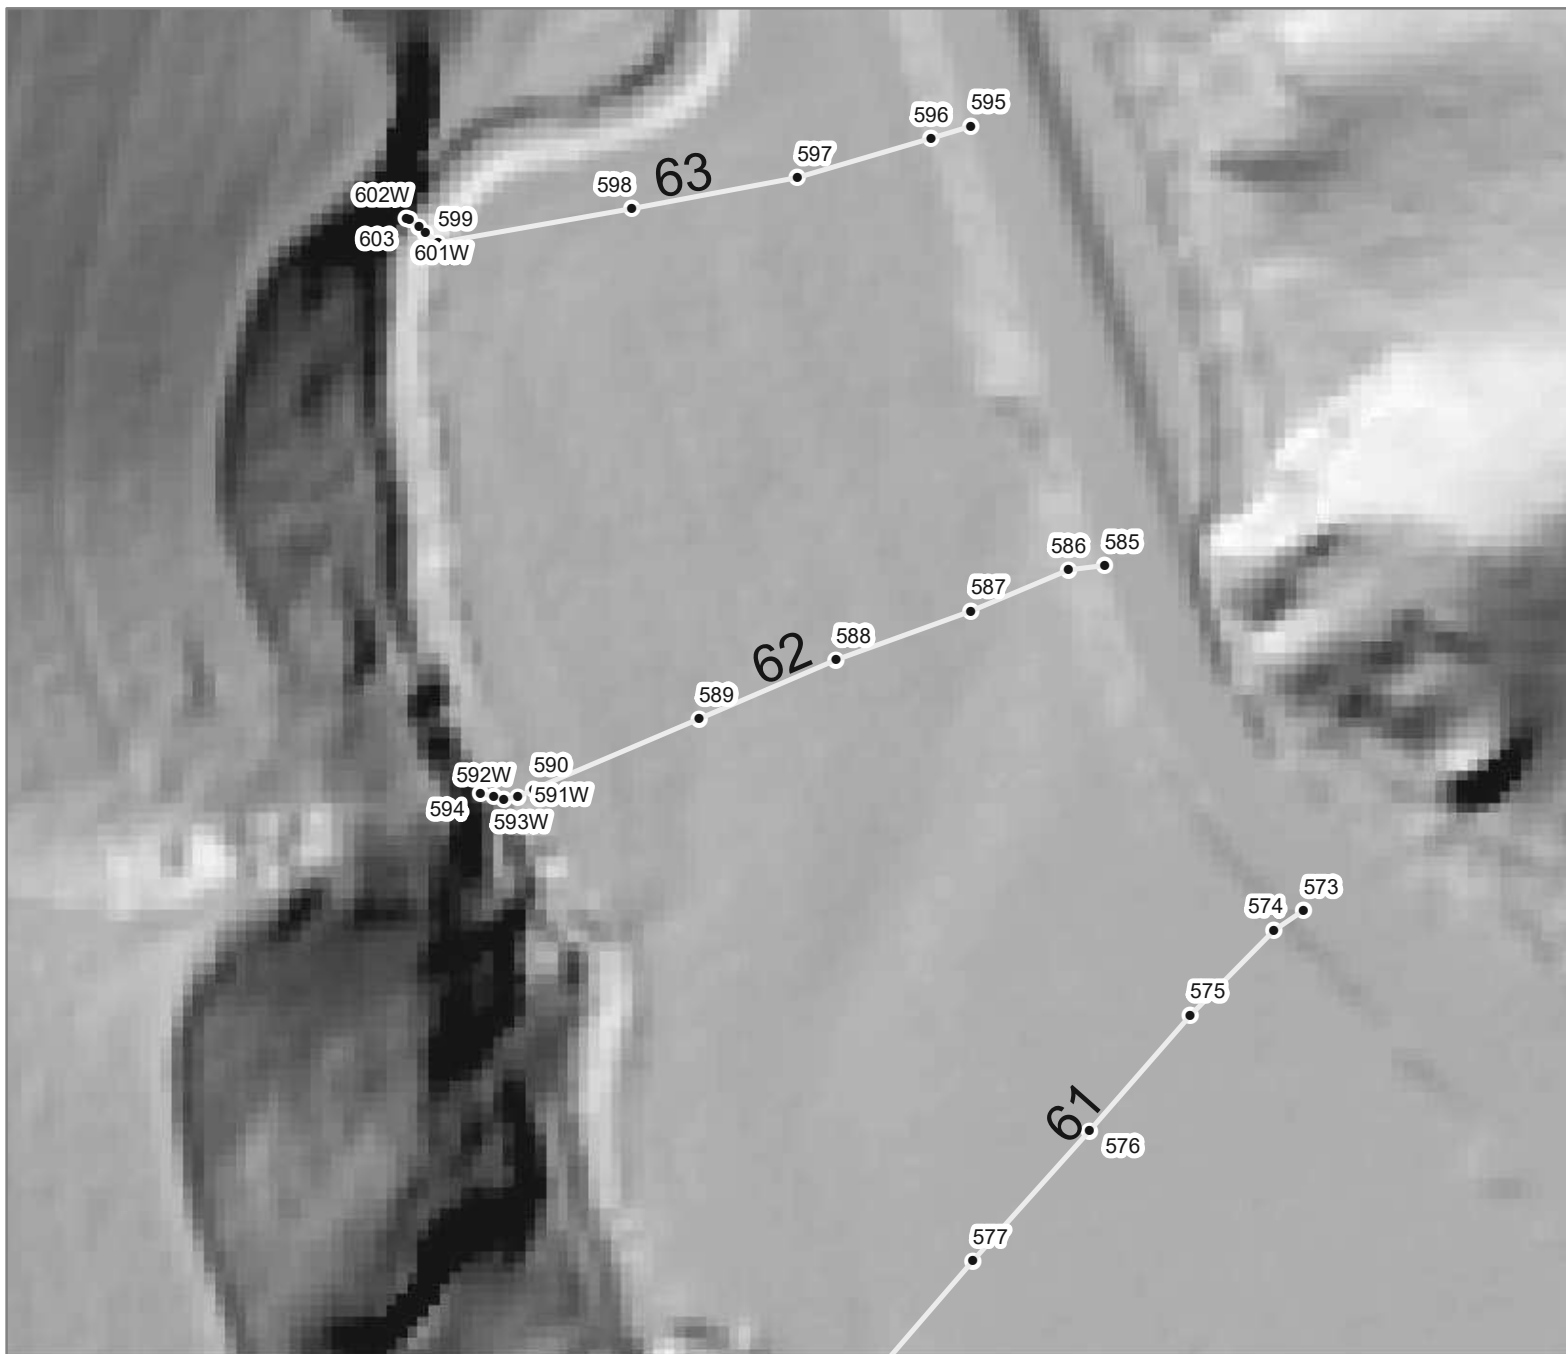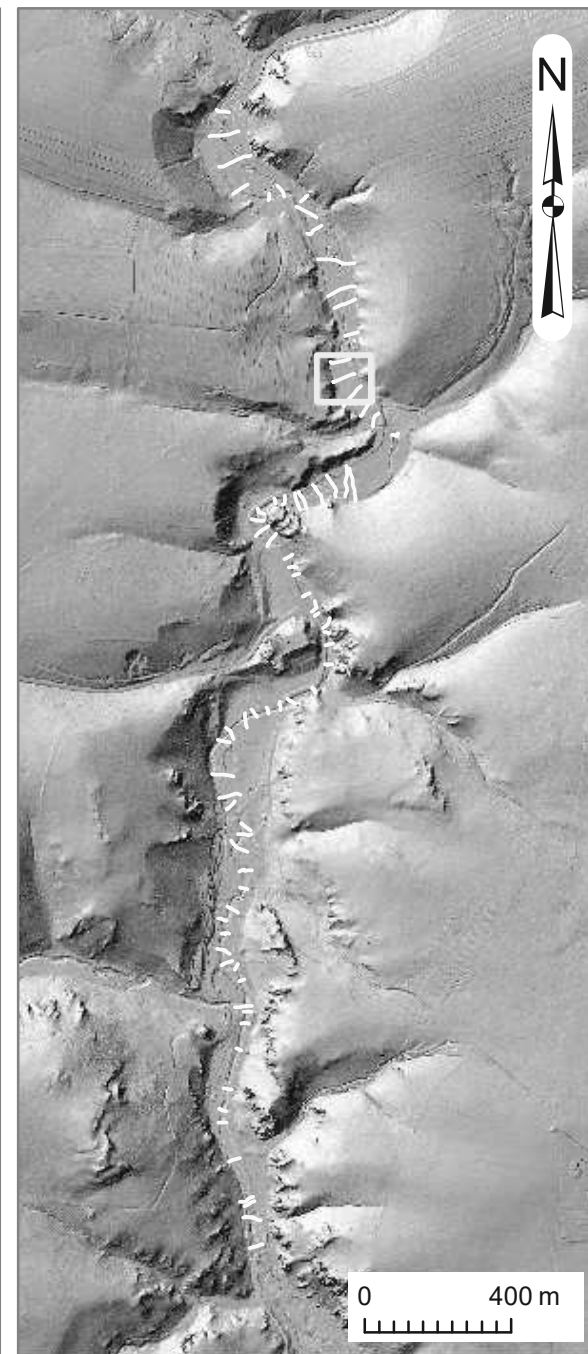

*Proile: 62* Analyses of the Prądnik riverbed shape based on archiva and contemporary data sets – old maps, LIDAR, DTMs and cross-sectional profile



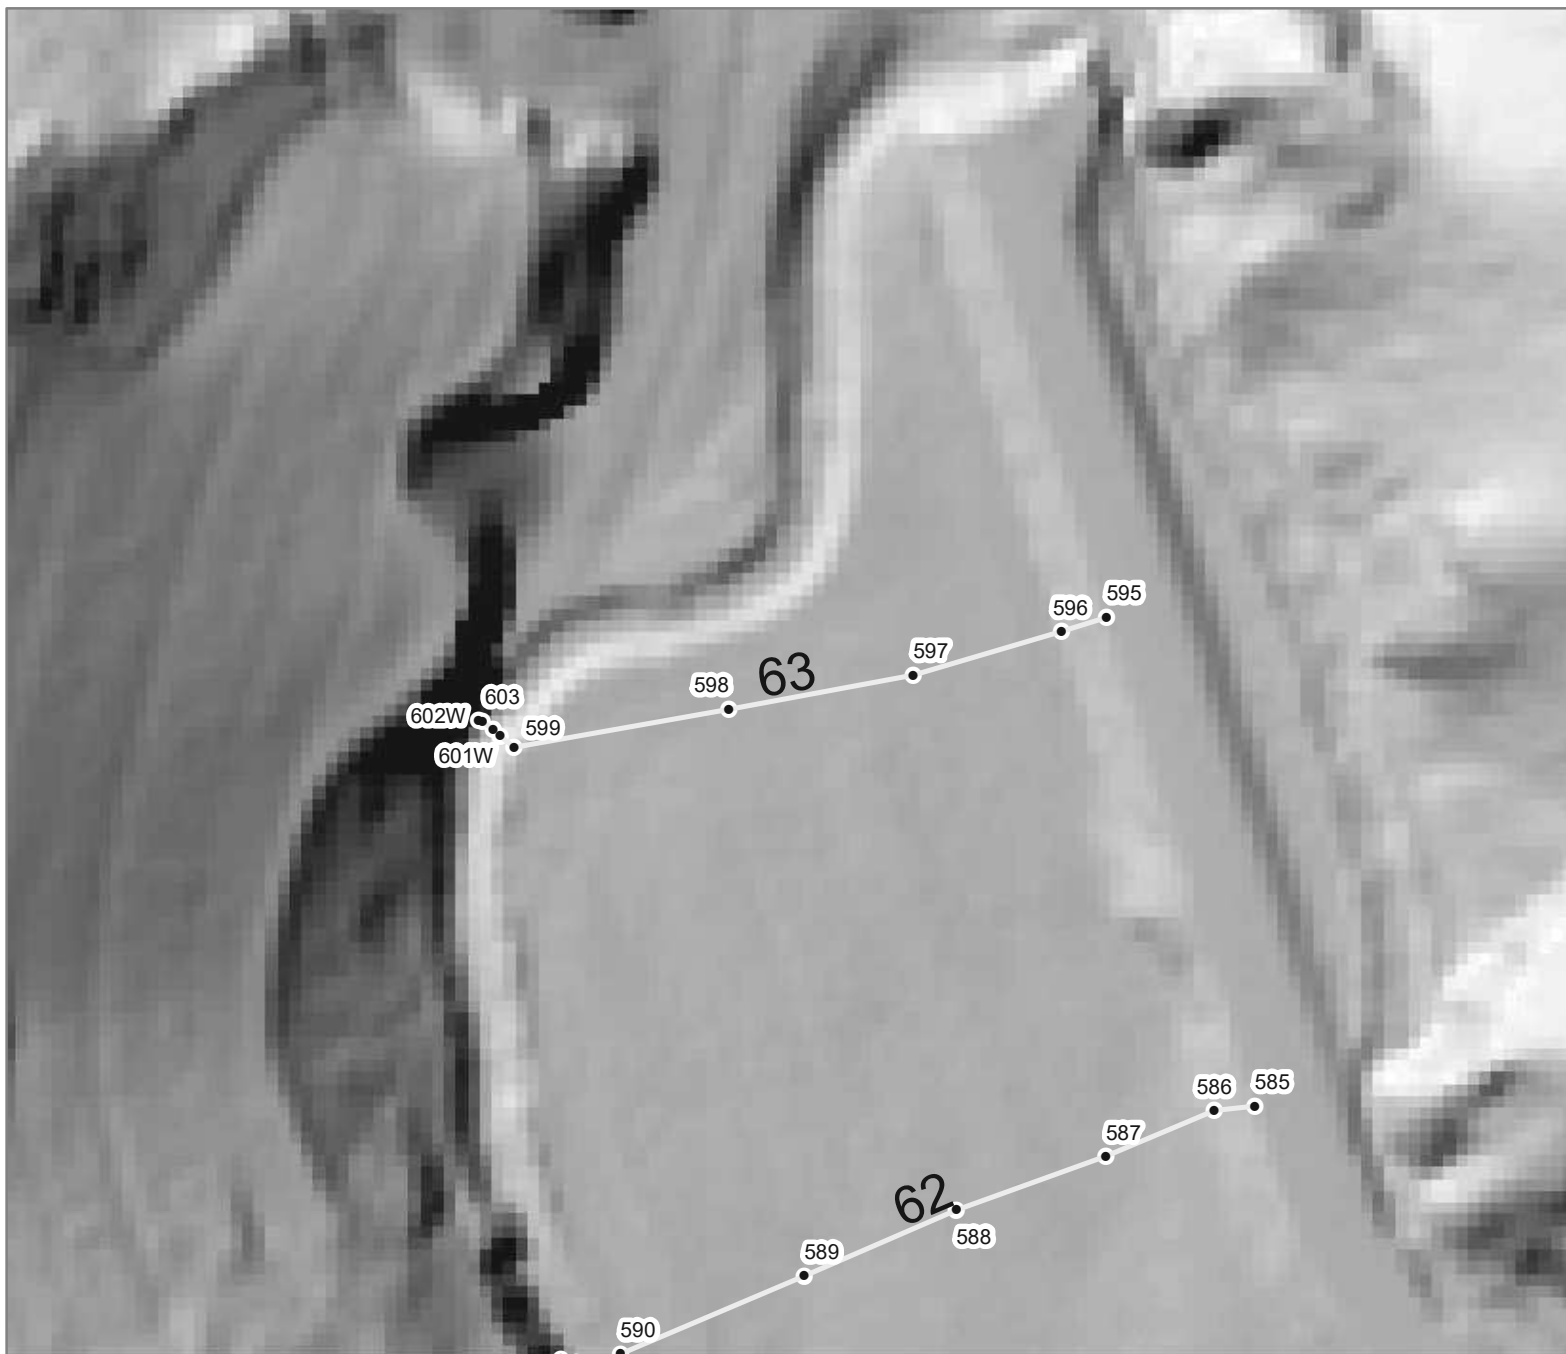

0 10 20 m

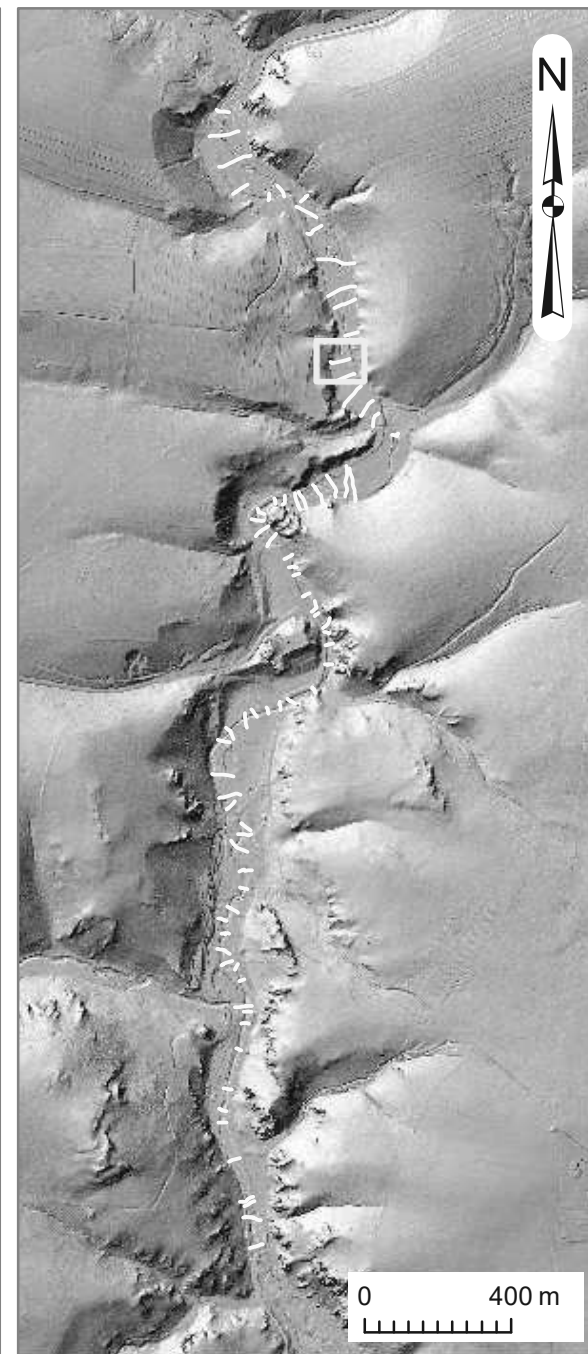

*Proile: 63* Analyses of the Prądnik riverbed shape based on archiva and contemporary data sets – old maps, LIDAR, DTMs and cross-sectional profile

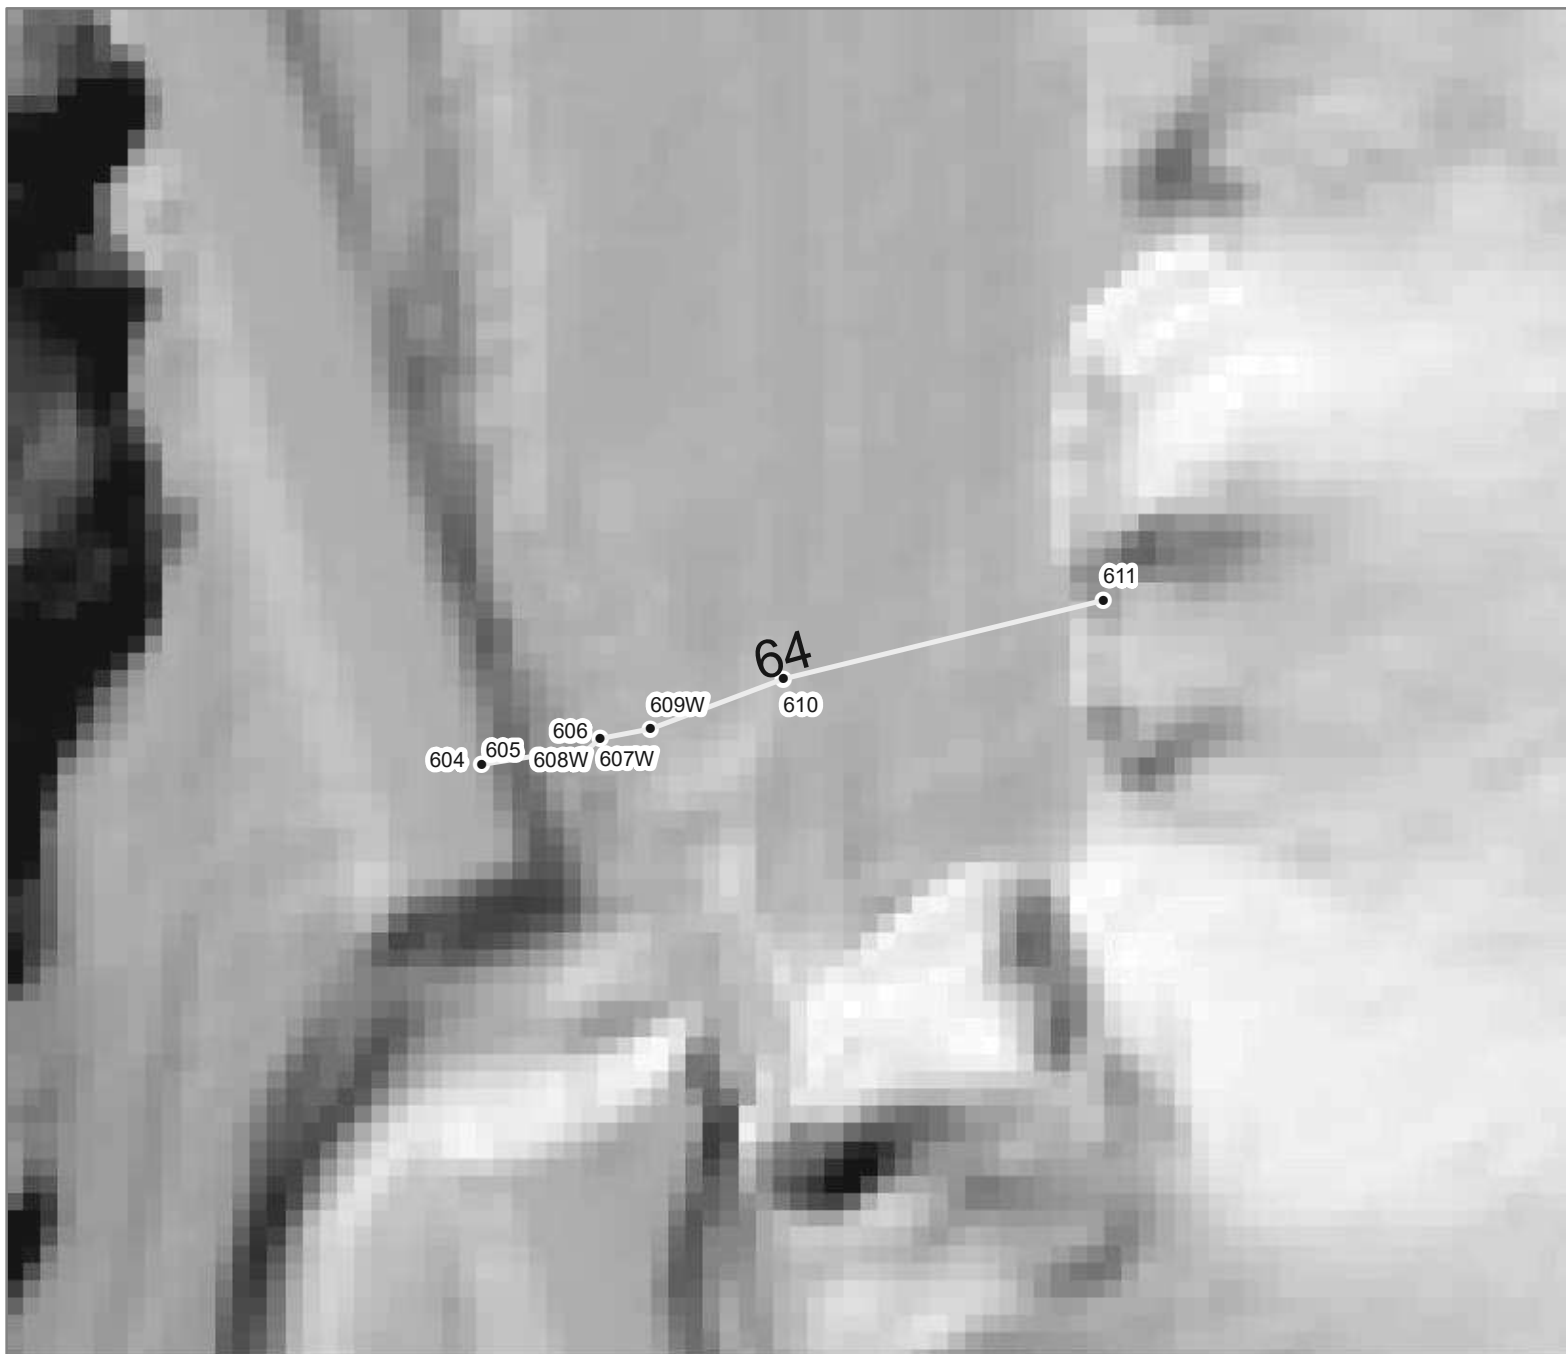

0 10 20 m

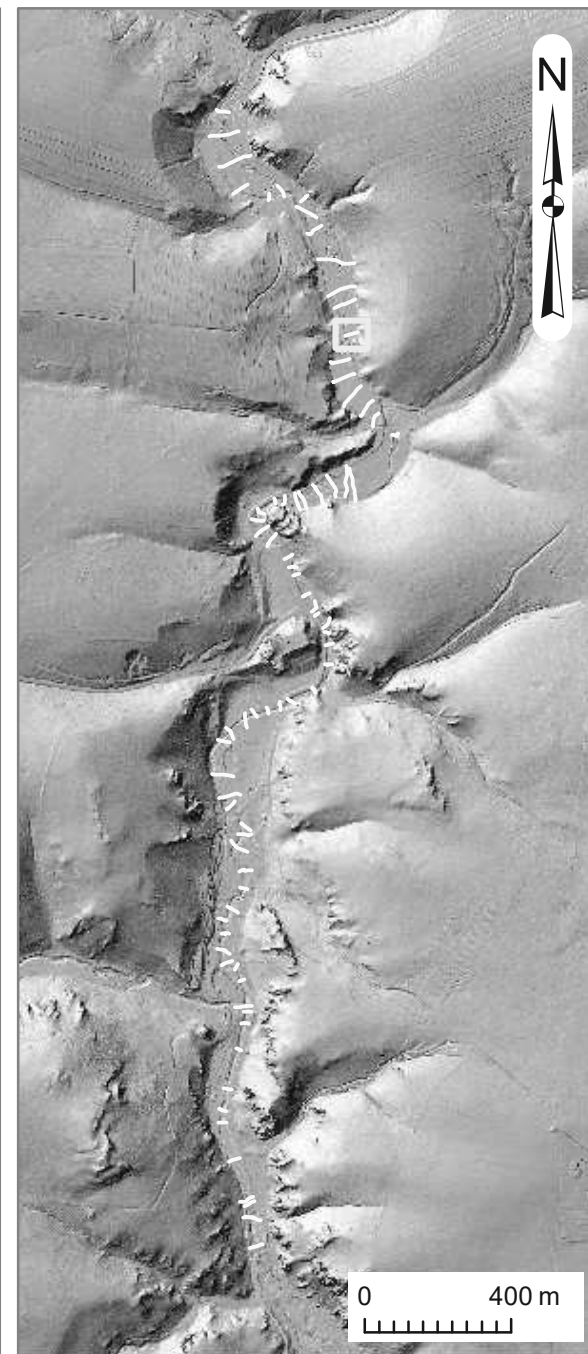

0 400 m

*Proile: 64* Analyses of the Prądnik riverbed shape based on archiva and contemporary data sets – old maps, LIDAR, DTMs and cross-sectional profile

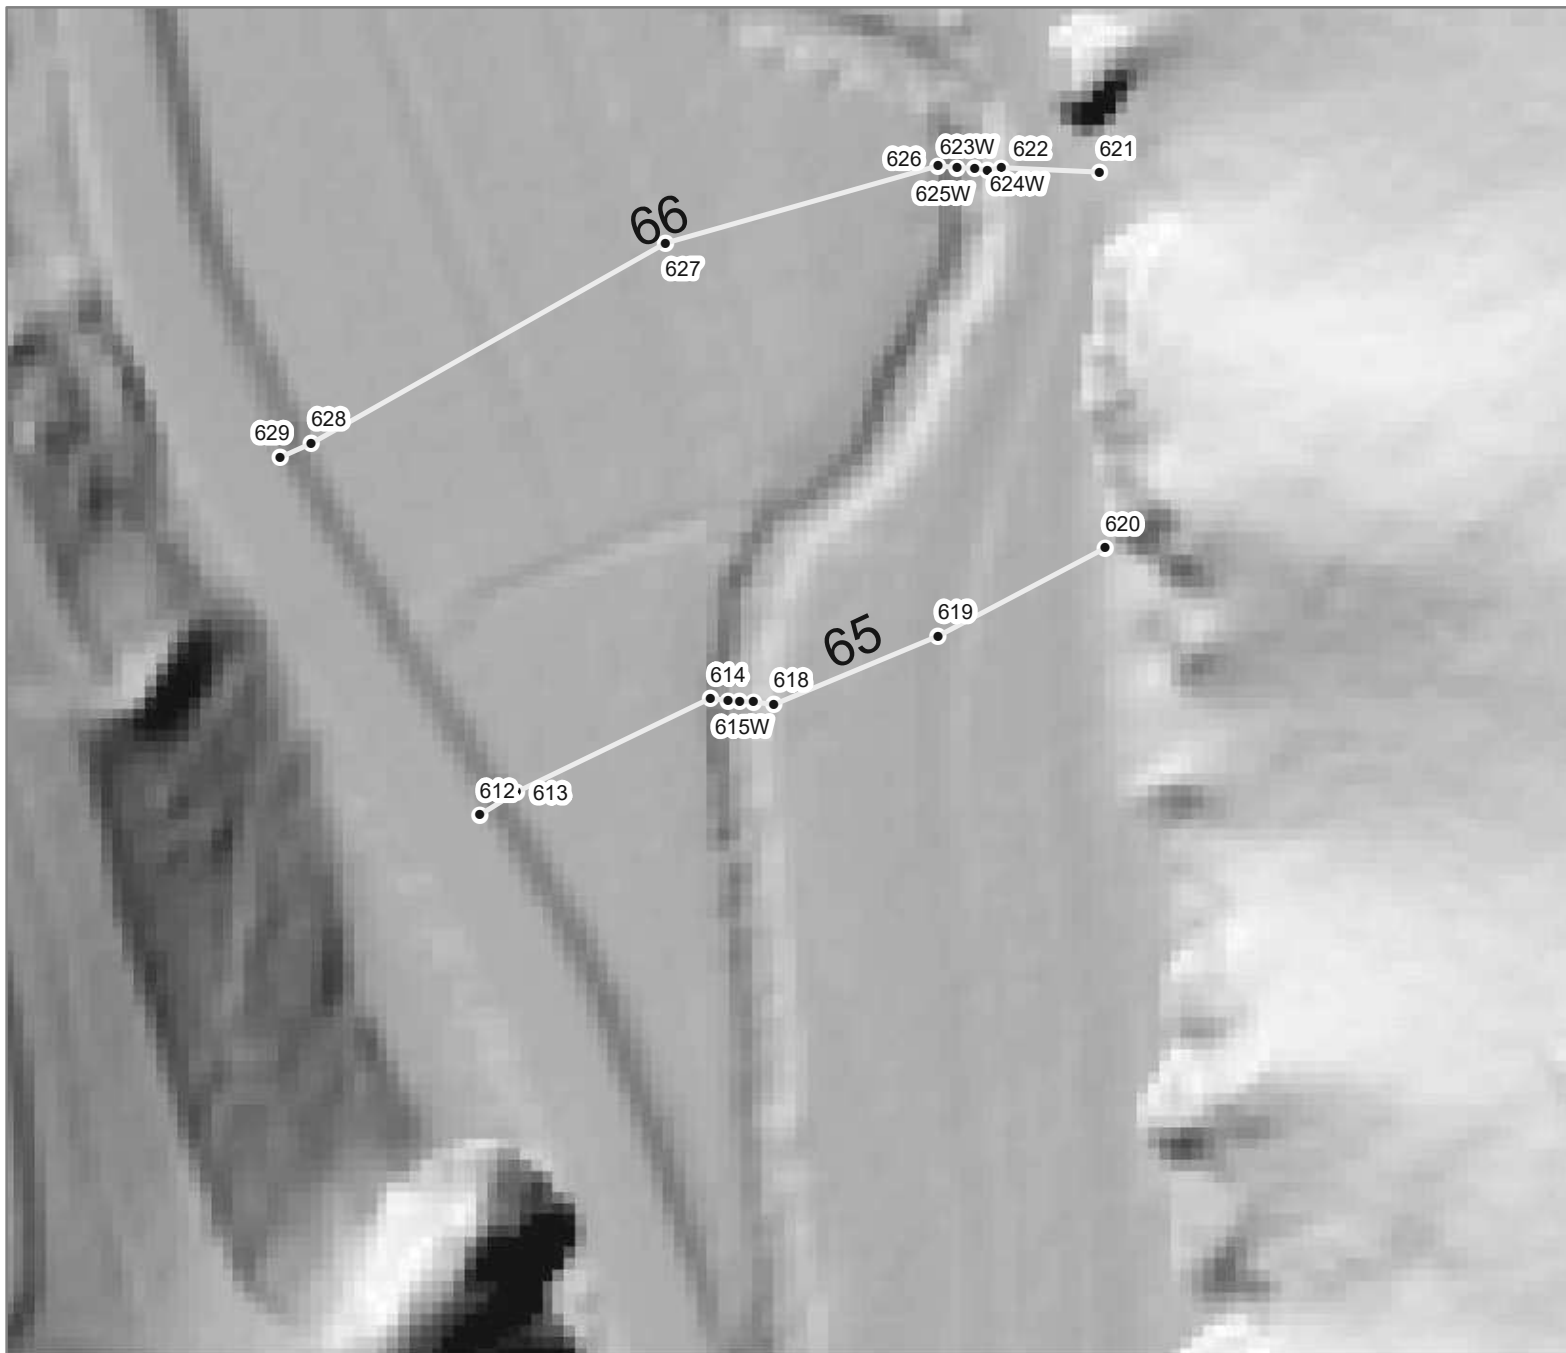

0 10 20 m

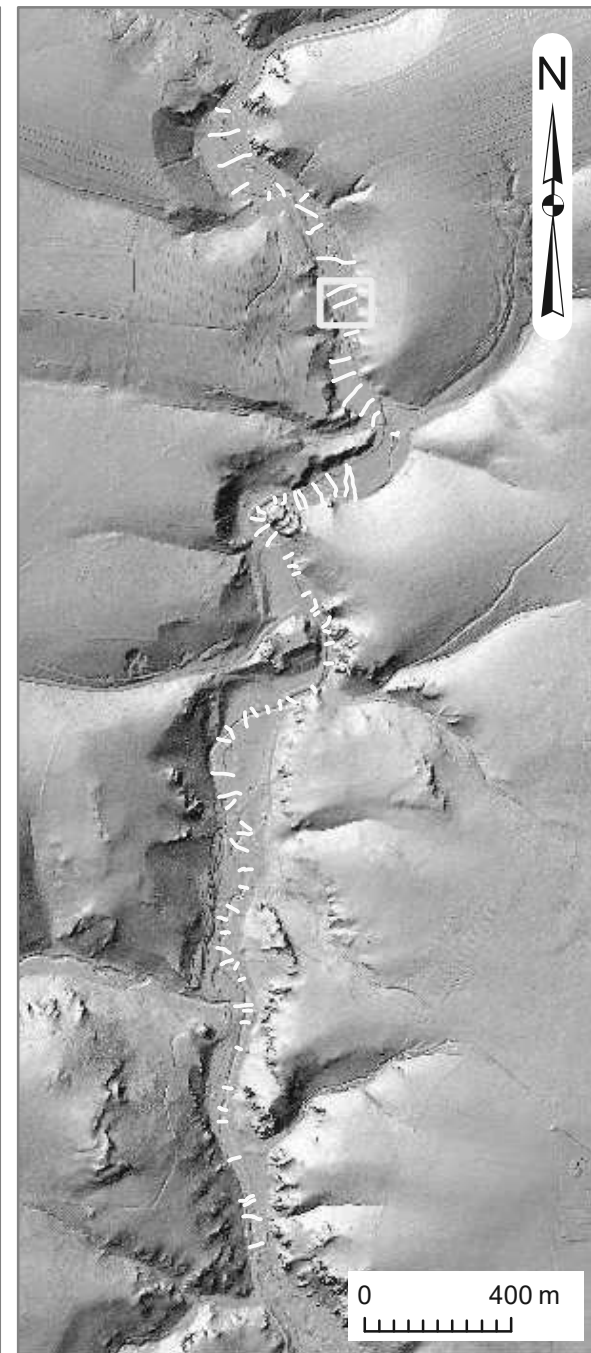

0 400 m

*Proile: 65* Analyses of the Prądnik riverbed shape based on archiva and contemporary data sets – old maps, LIDAR, DTMs and cross-sectional profile

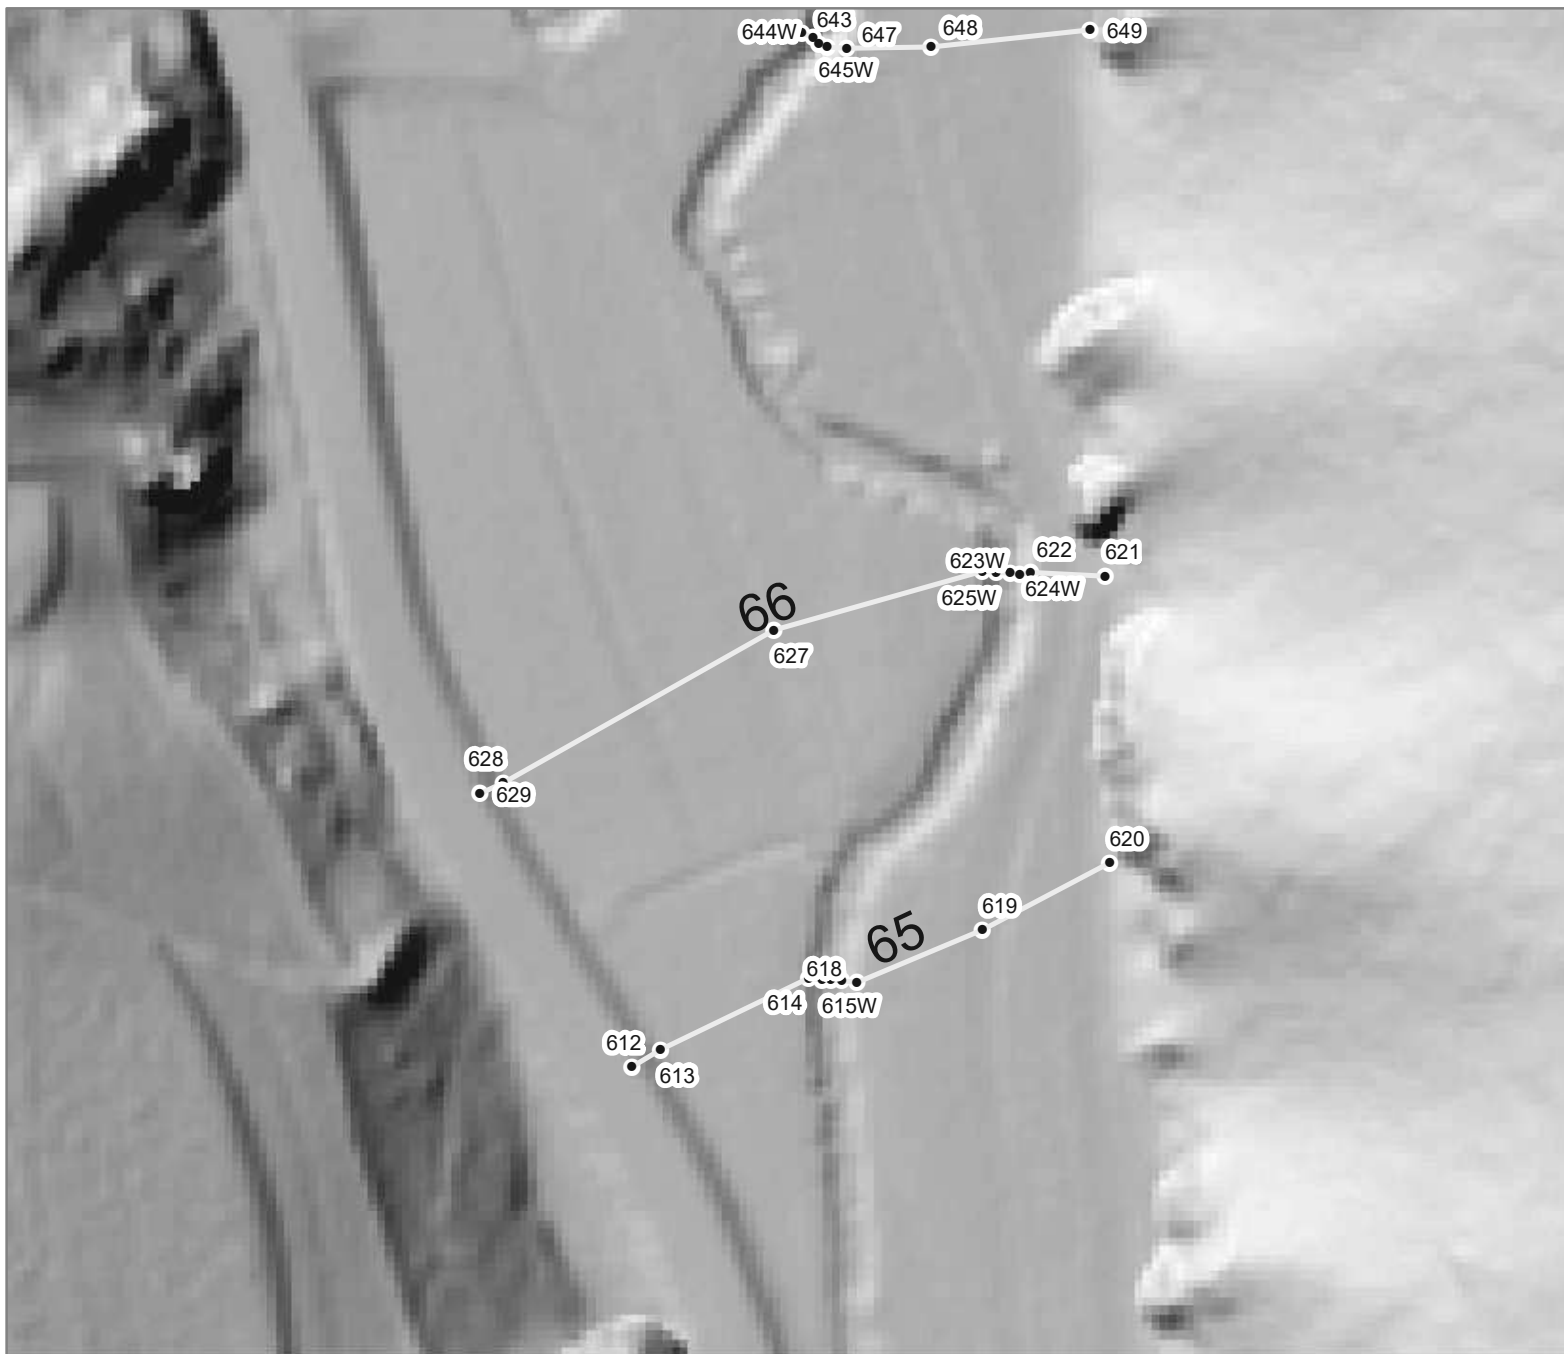

0 10 20 m

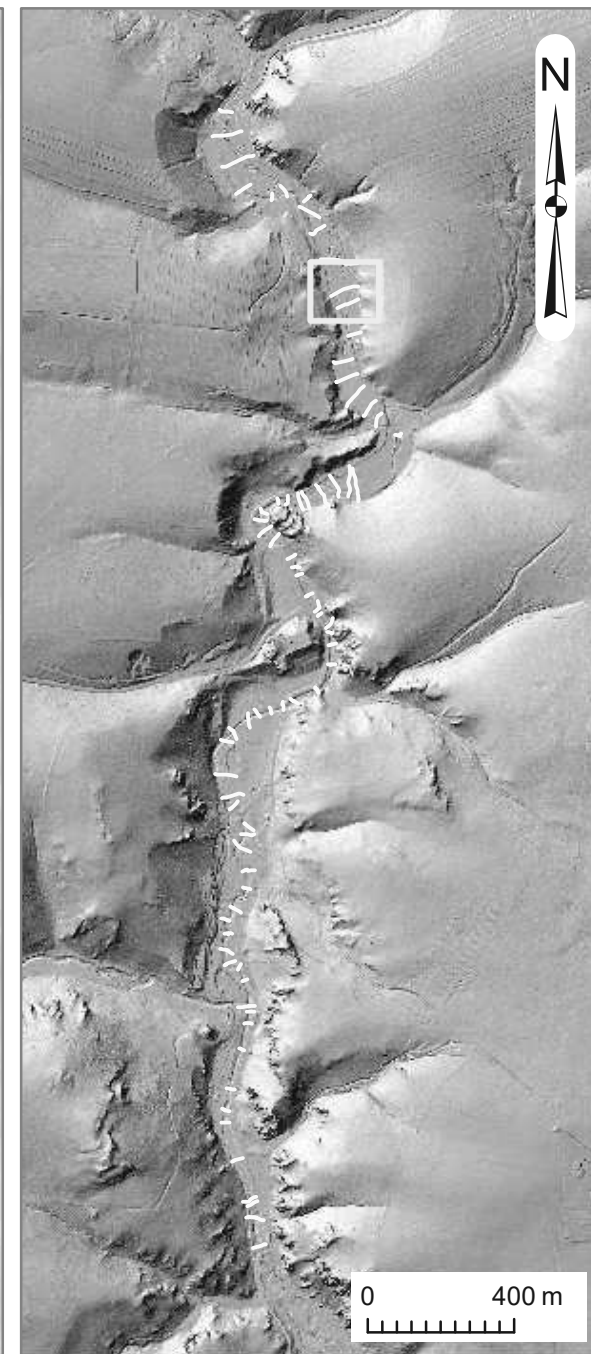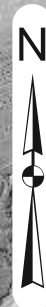

0 400 m

*Proile: 66* Analyses of the Prądnik riverbed shape based on archiva and contemporary data sets – old maps, LIDAR, DTMs and cross-sectional profile

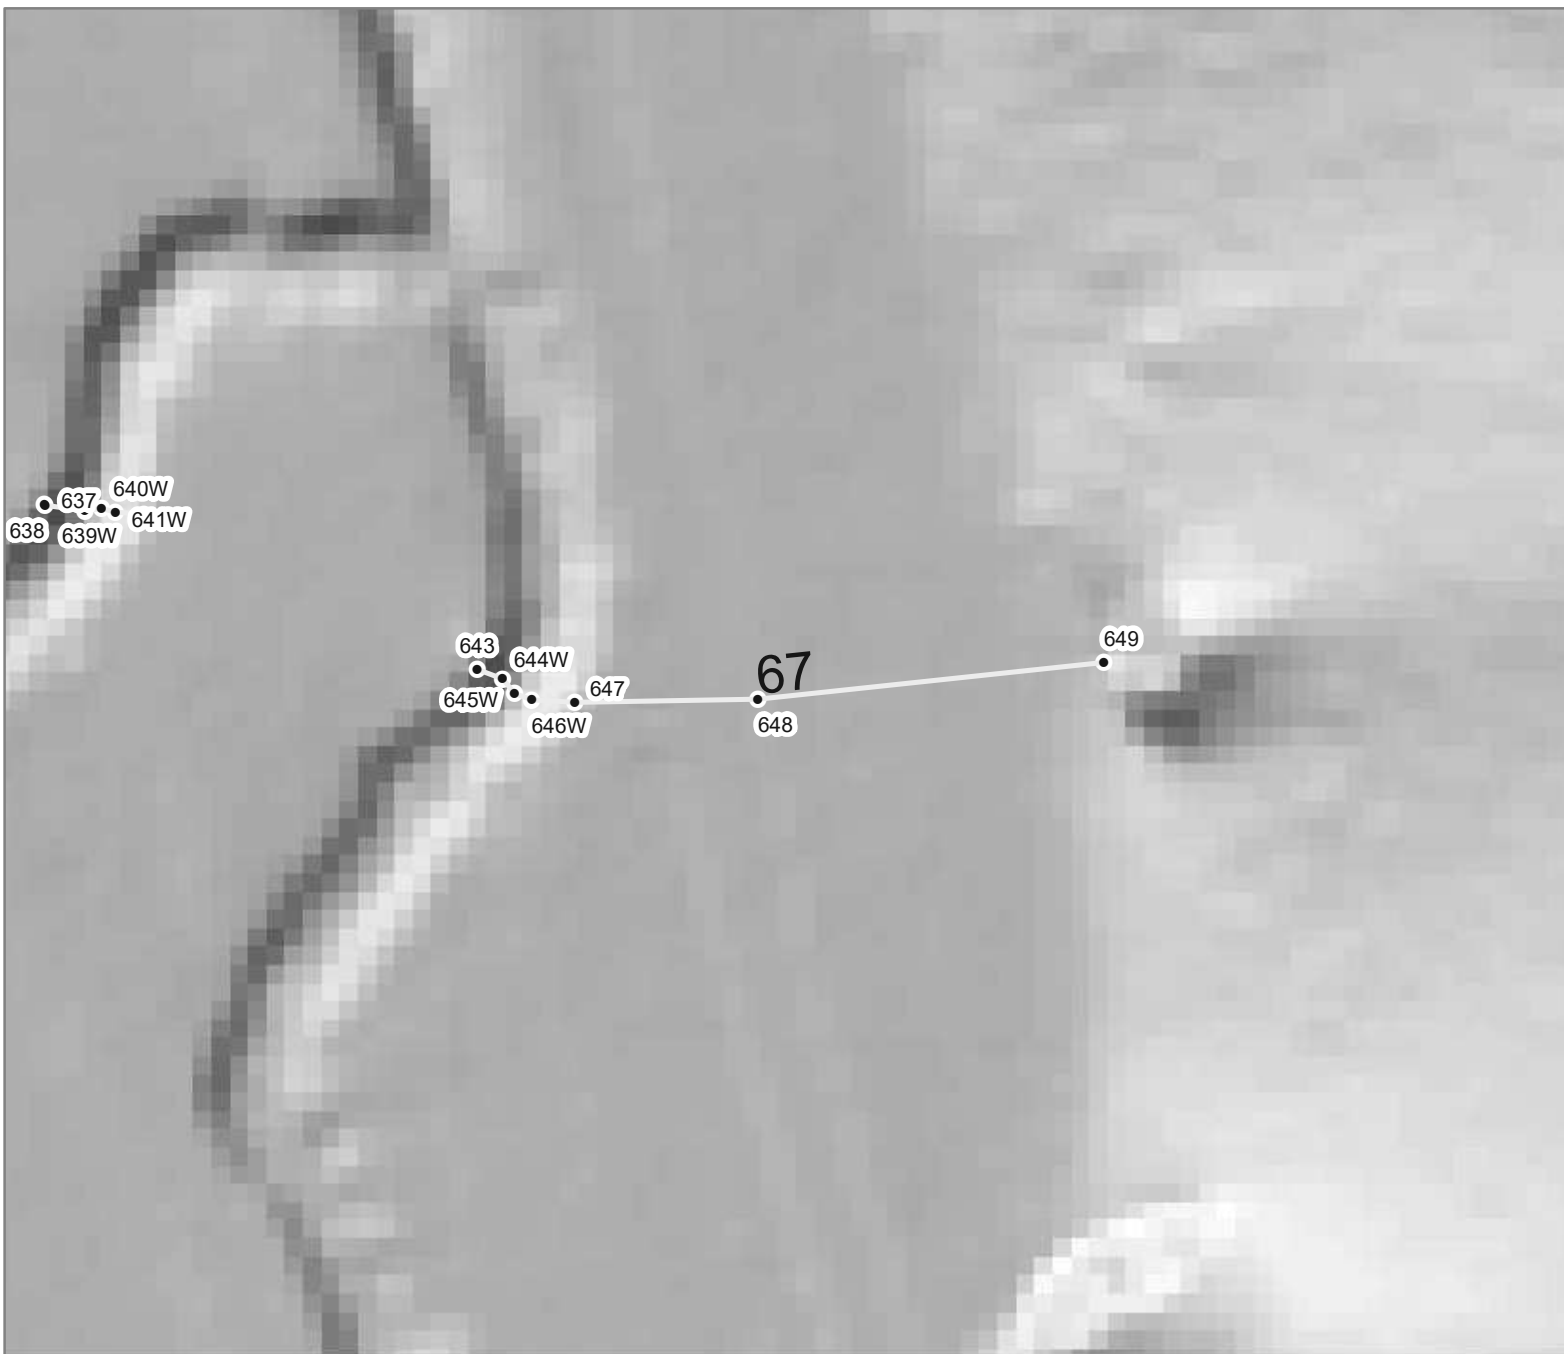

0 10 20 m

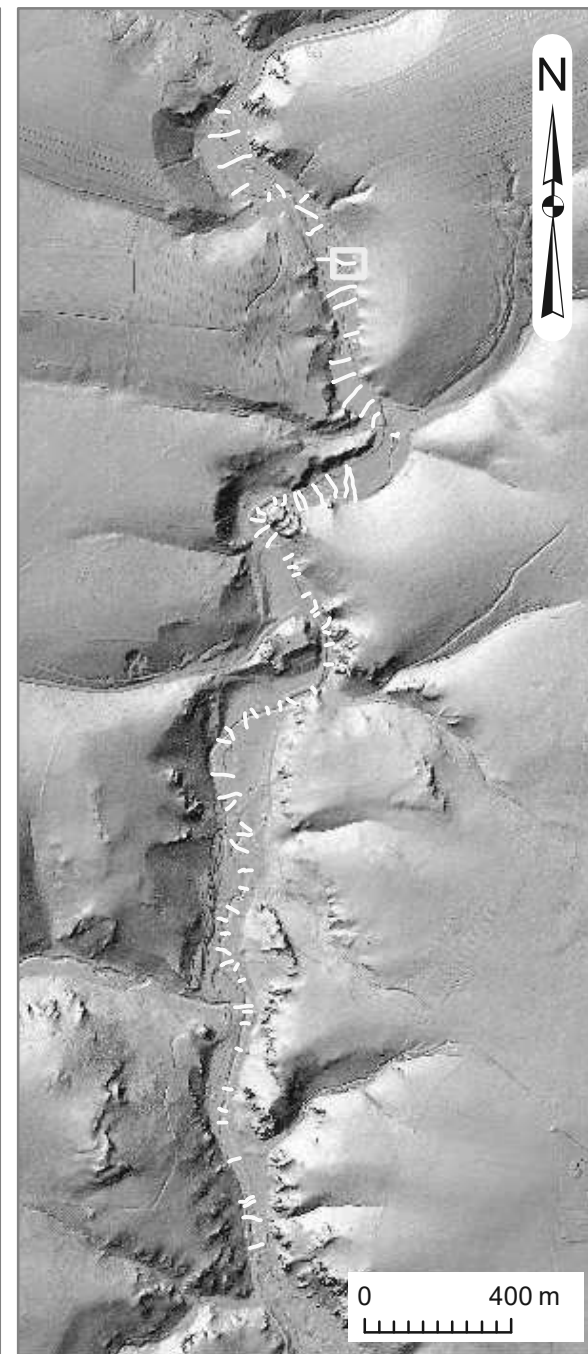

0 400 m

*Proile: 67* Analyses of the Prądnik riverbed shape based on archiva and contemporary data sets – old maps, LIDAR, DTMs and cross-sectional profile

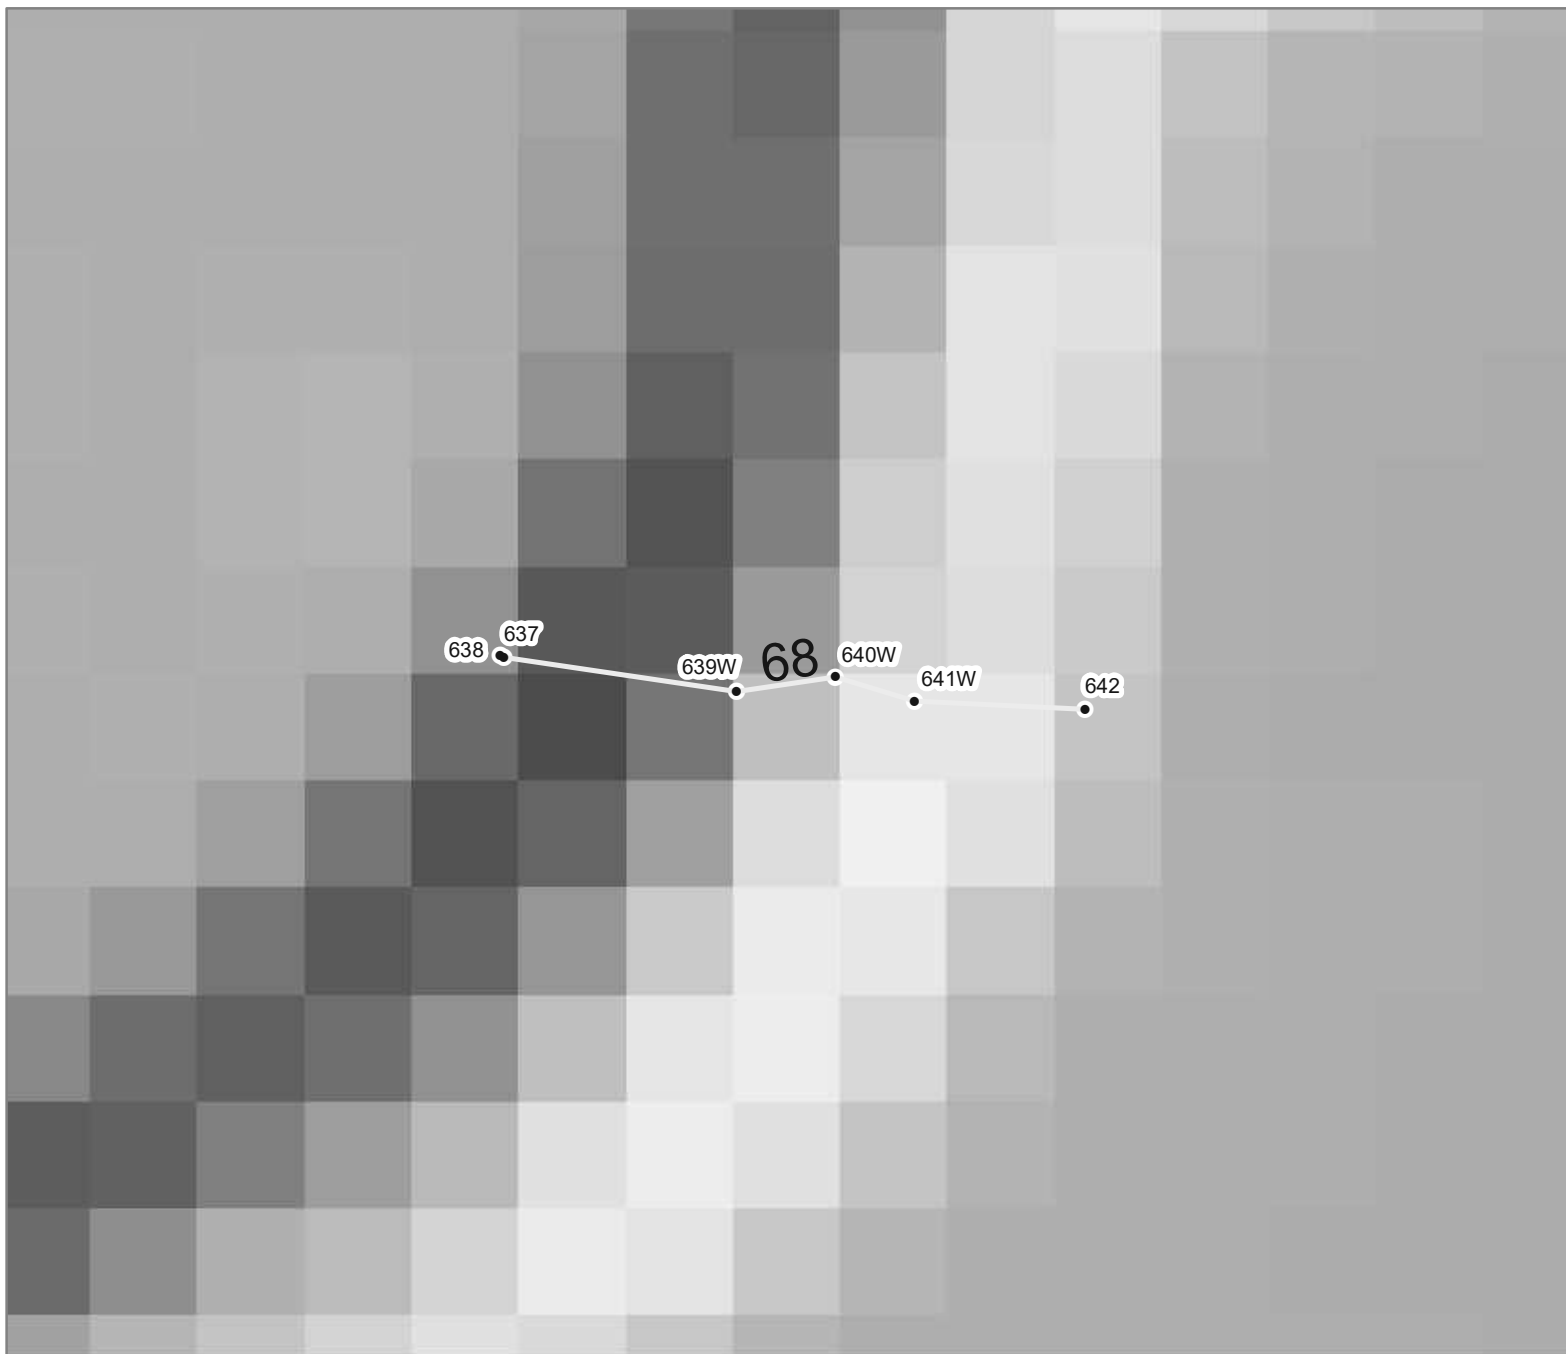

0 10 m

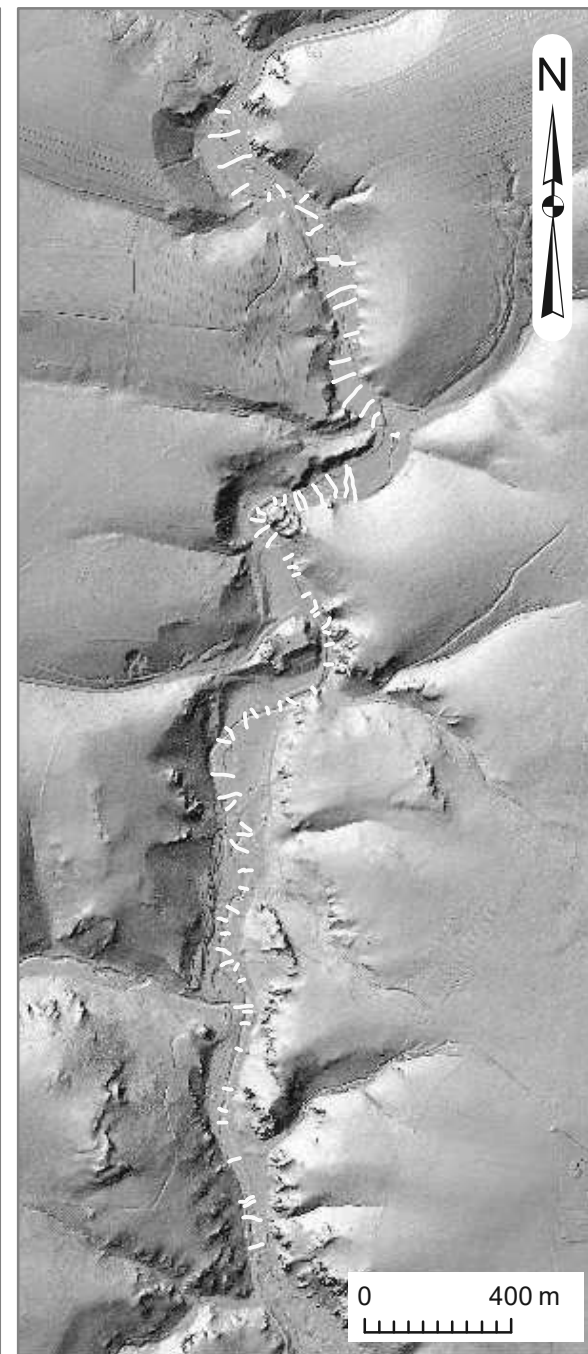

*Proile: 68* Analyses of the Prądnik riverbed shape based on archiva and contemporary data sets – old maps, LIDAR, DTMs and cross-sectional profile



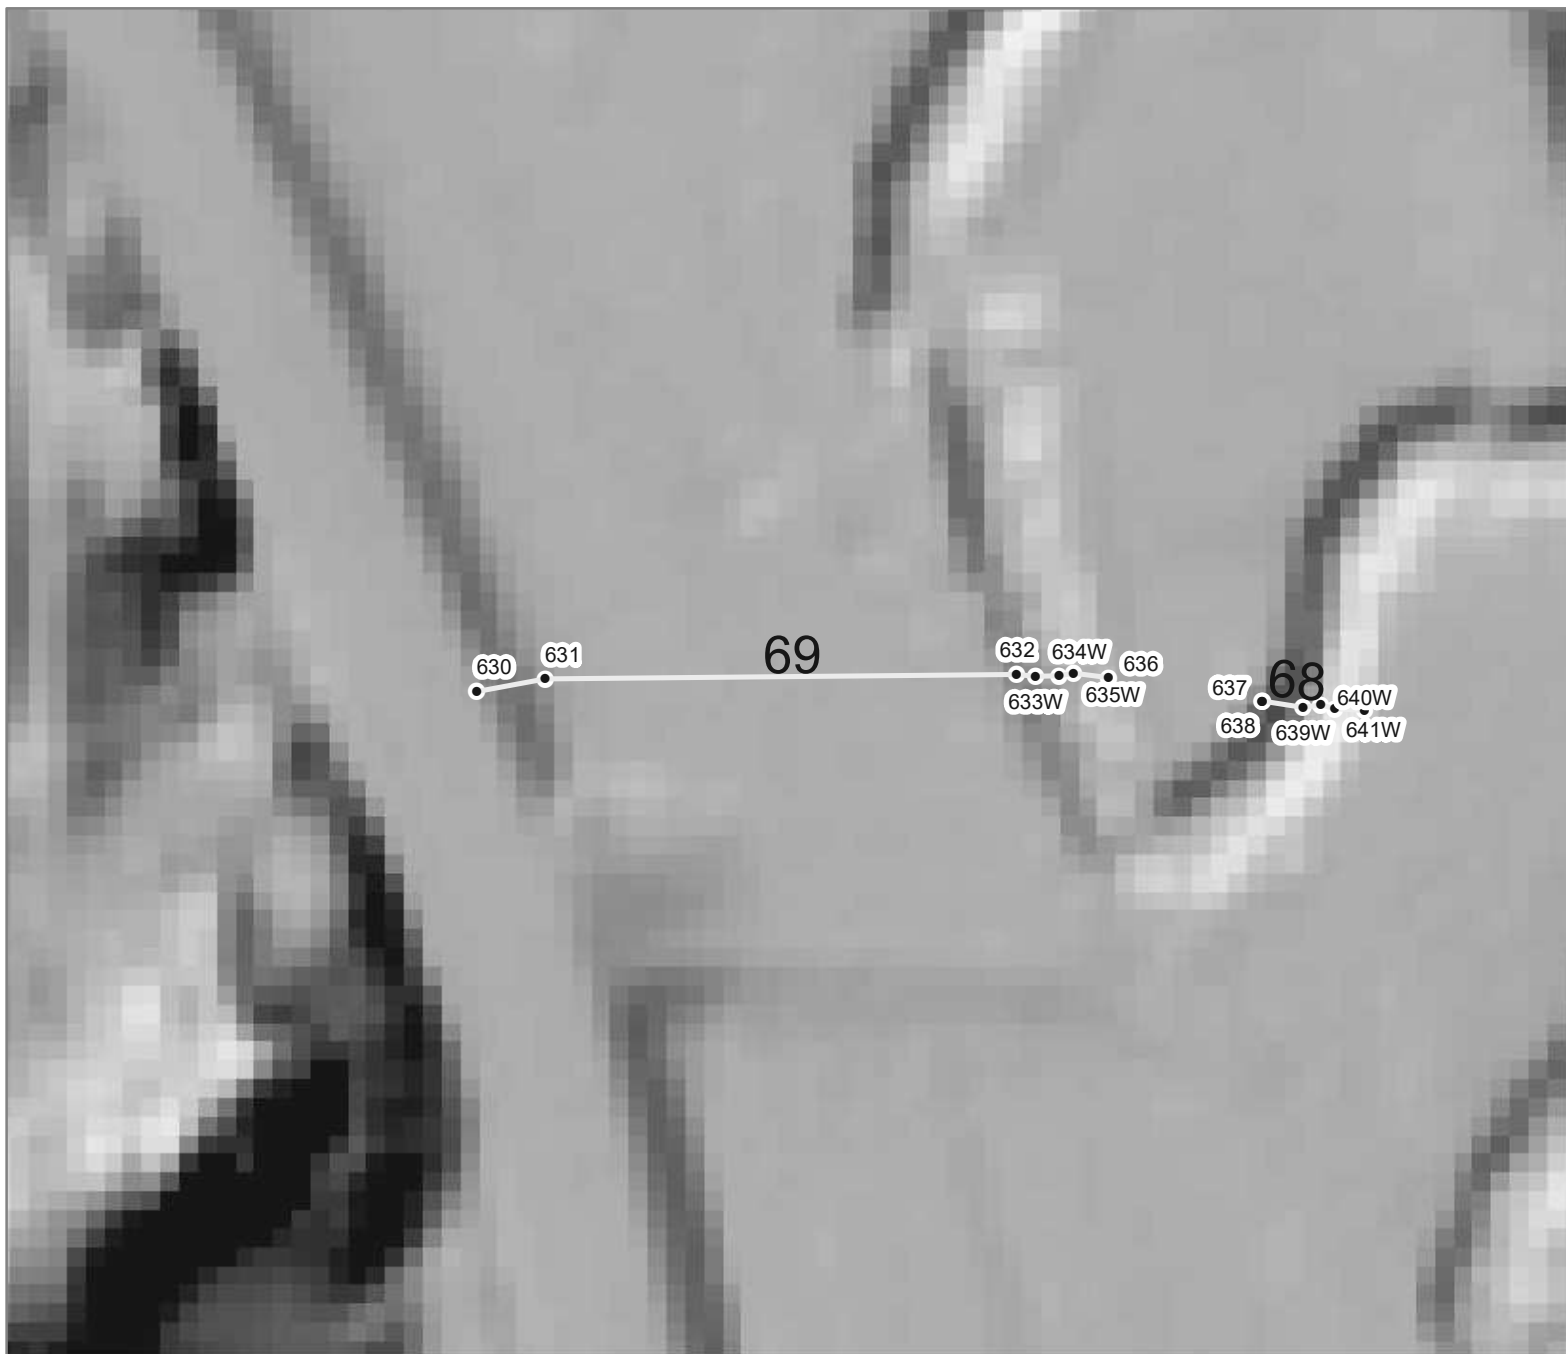

0 10 20 m

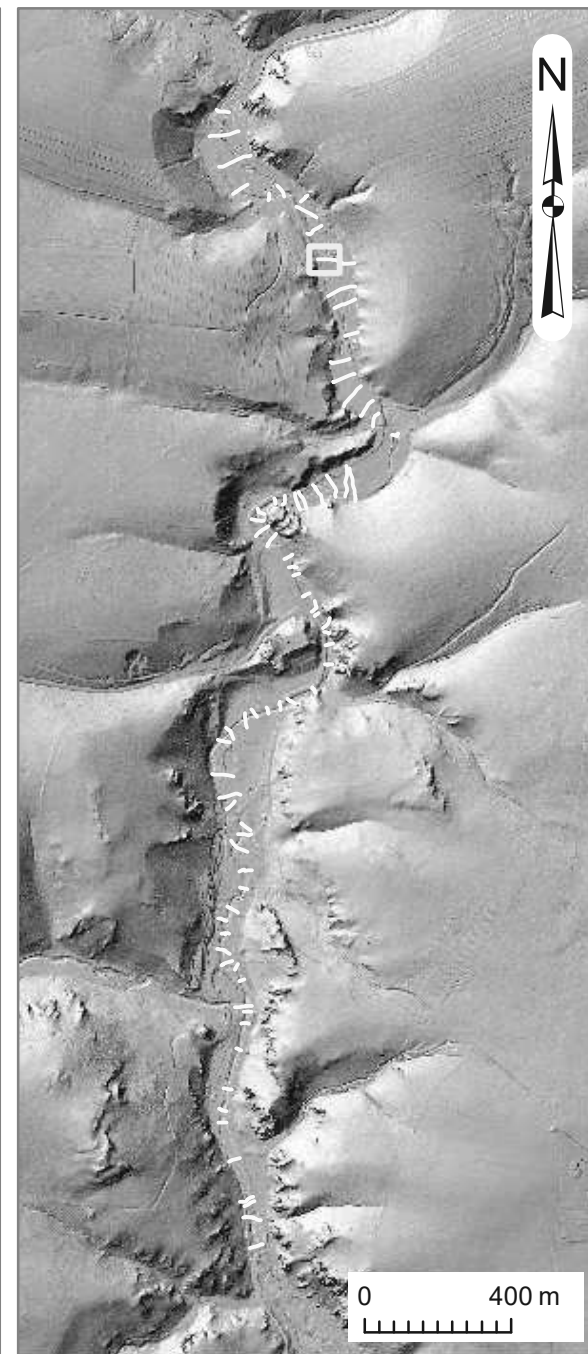

0 400 m

*Proile: 69* Analyses of the Prądnik riverbed shape based on archiva and contemporary data sets – old maps, LIDAR, DTMs and cross-sectional profile

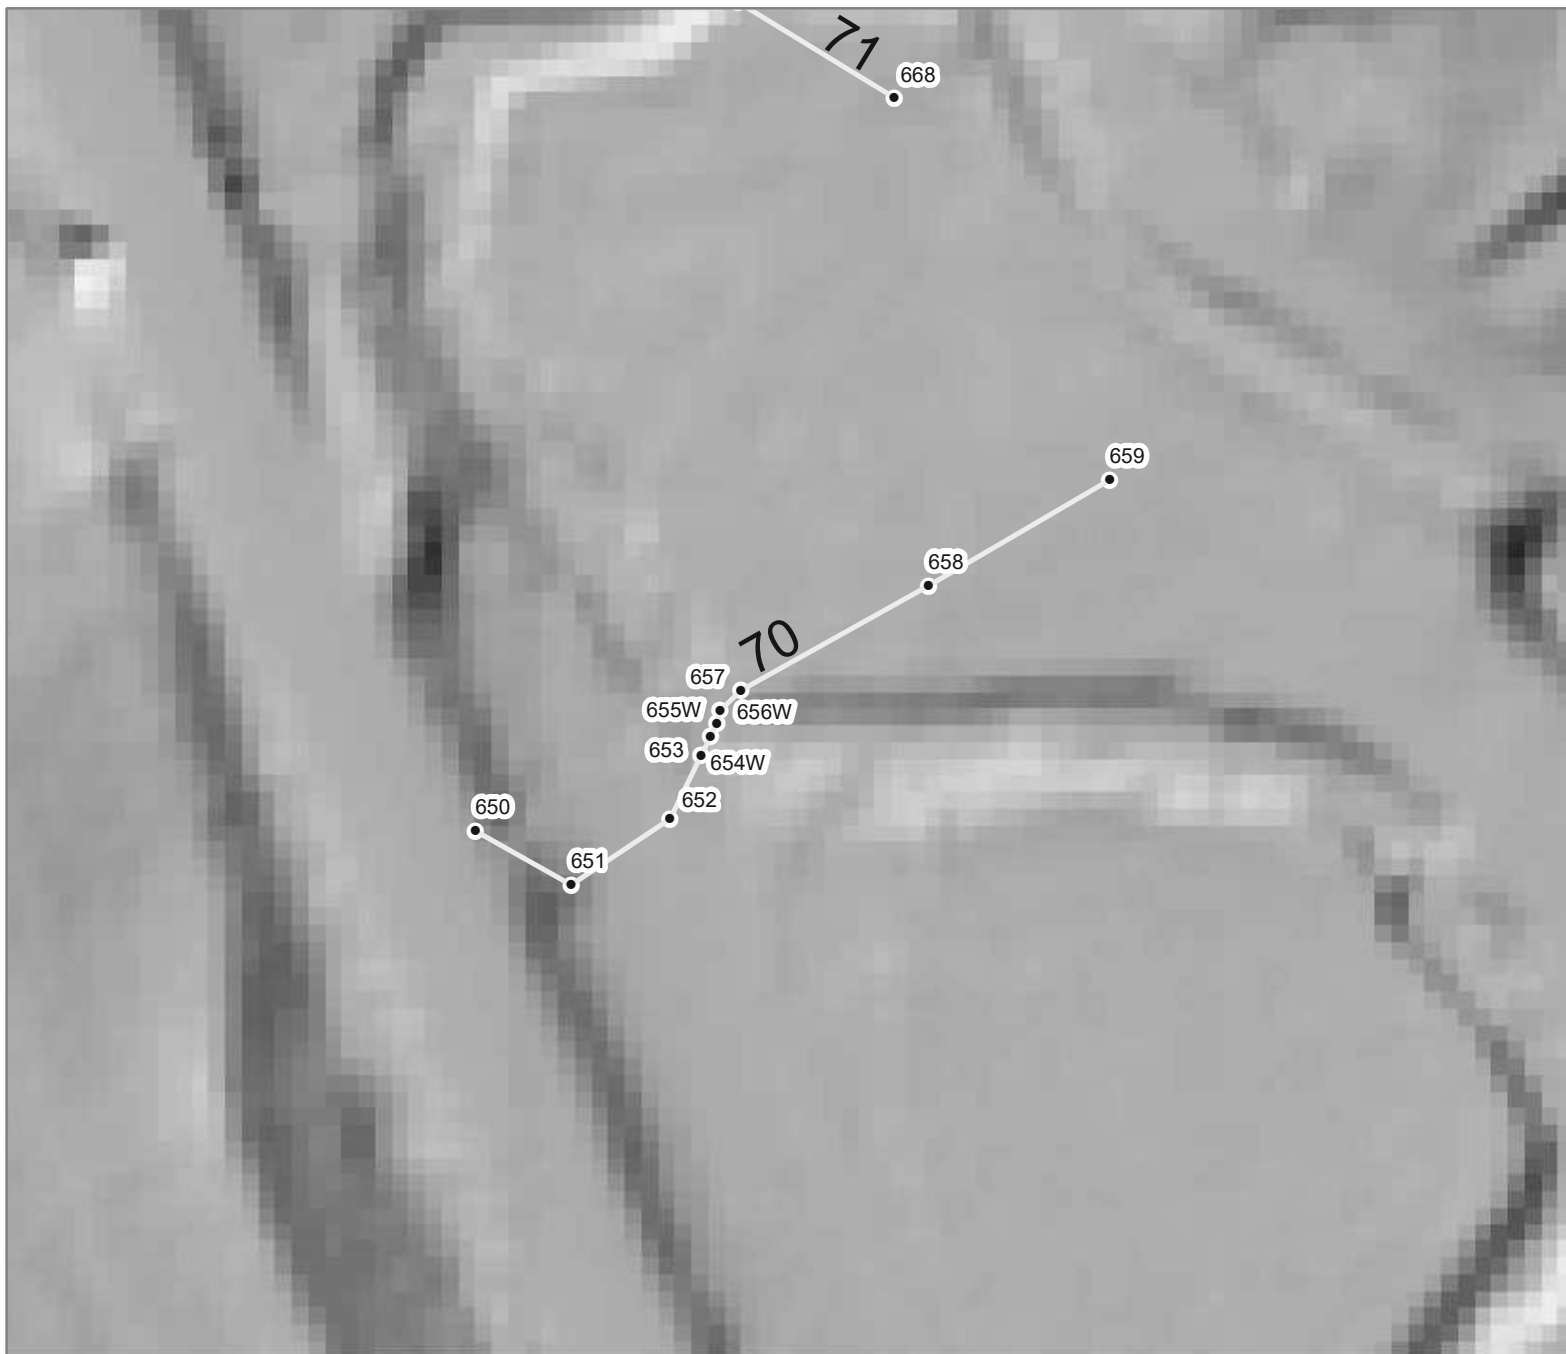

0 10 20 m

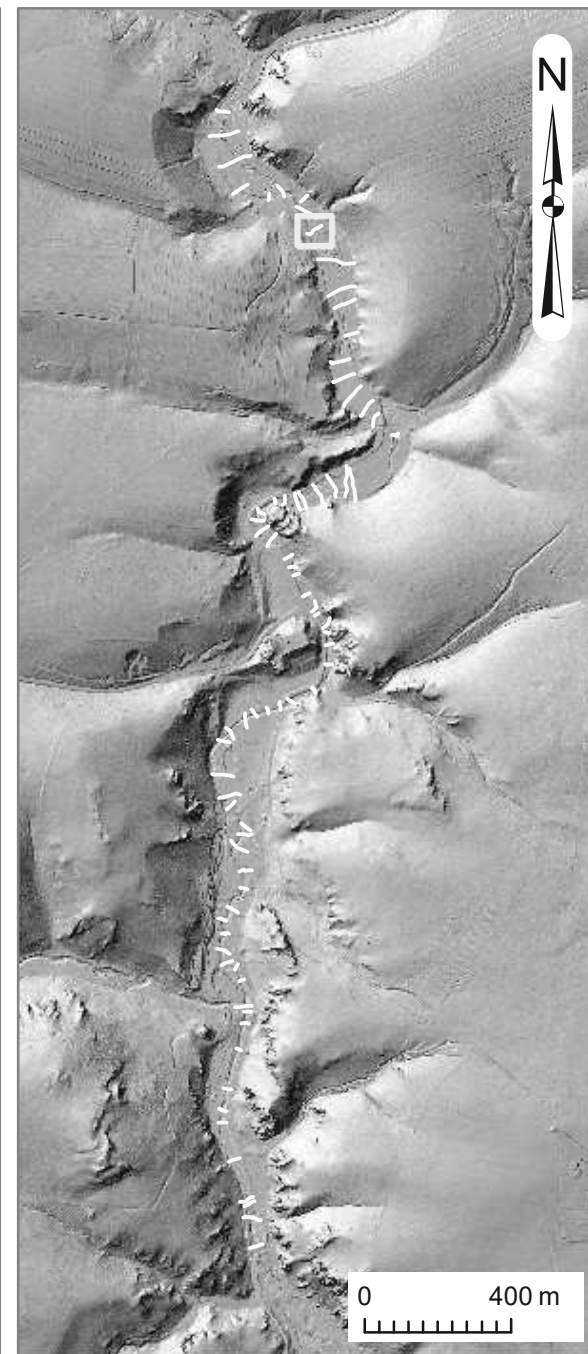

*Proile: 70* Analyses of the Prądnik riverbed shape based on archiva and contemporary data sets – old maps, LIDAR, DTMs and cross-sectional profile

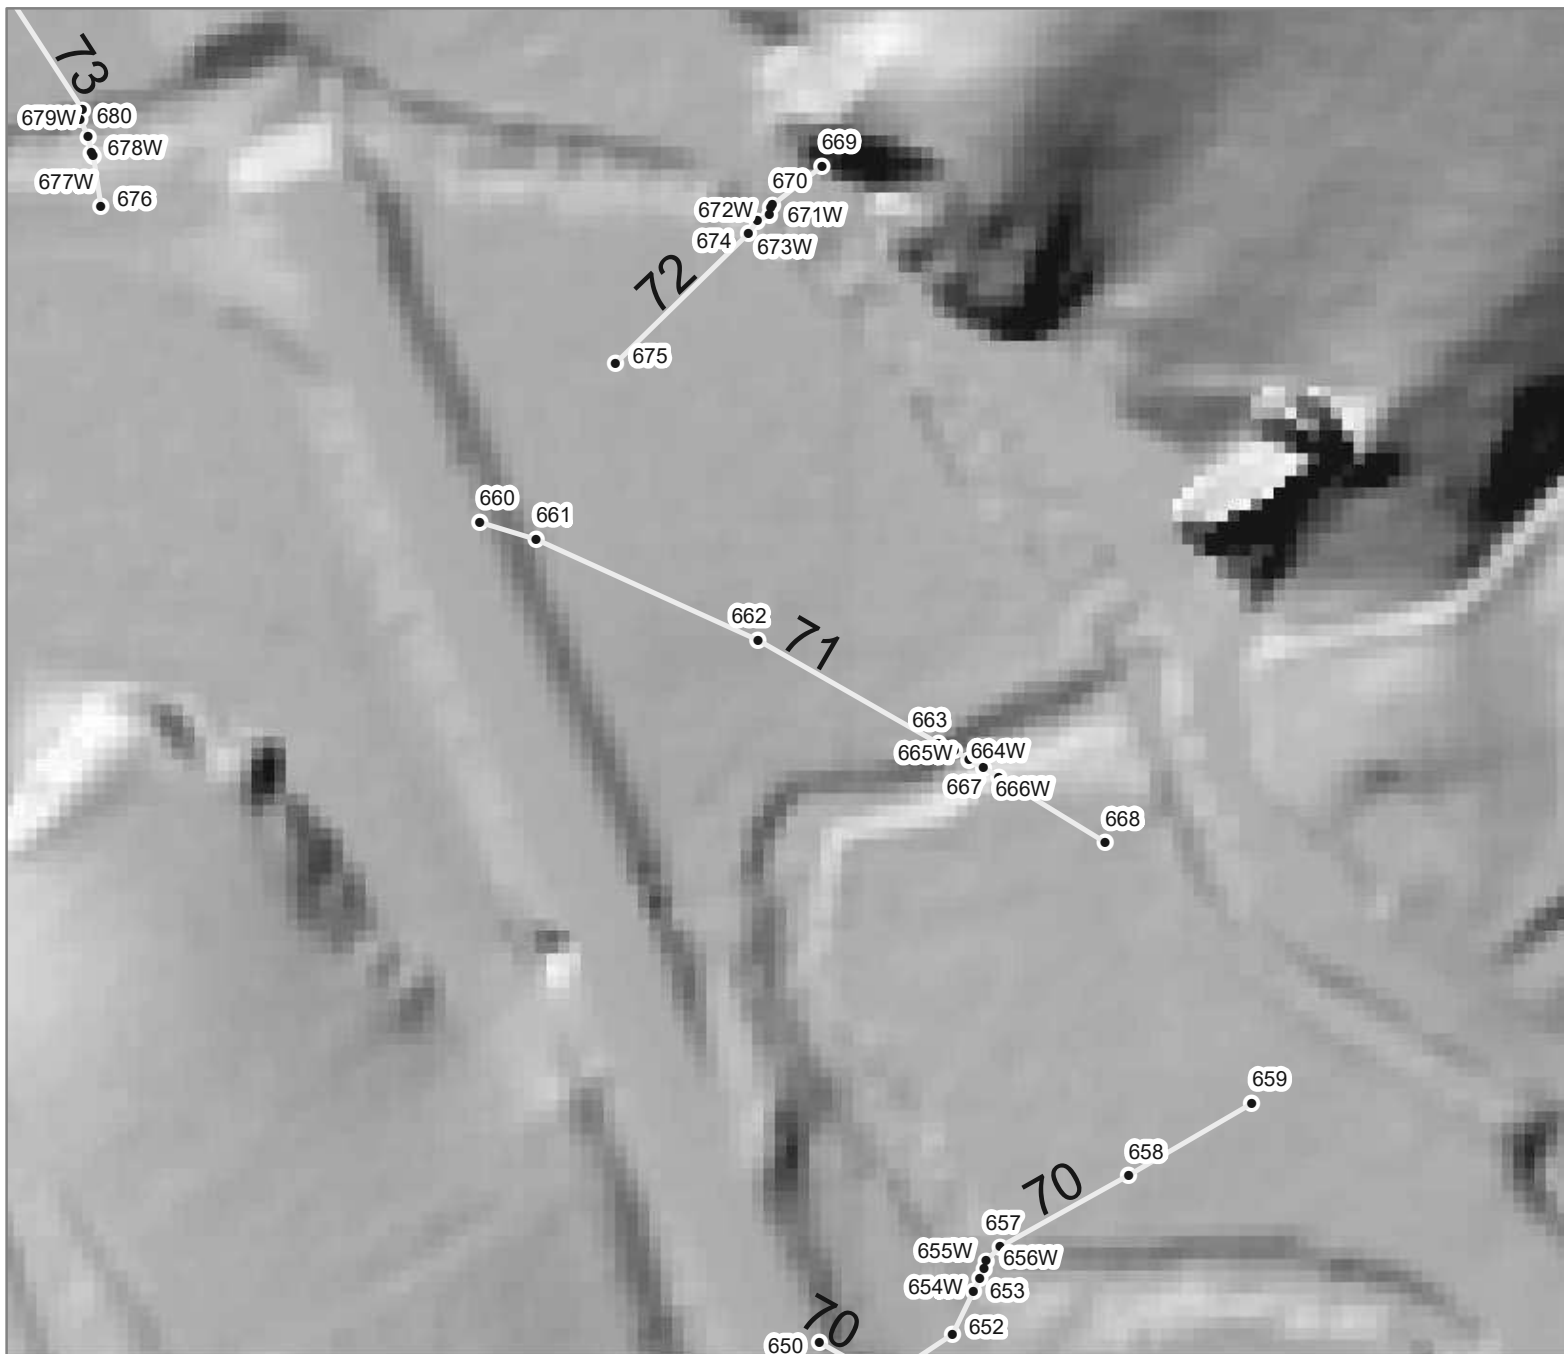

0 10 20 m

## Proile: 71

Analyses of the Prądnik riverbed shape based on archiva and contemporary data sets – old maps, LIDAR, DTMs and cross-sectional profile

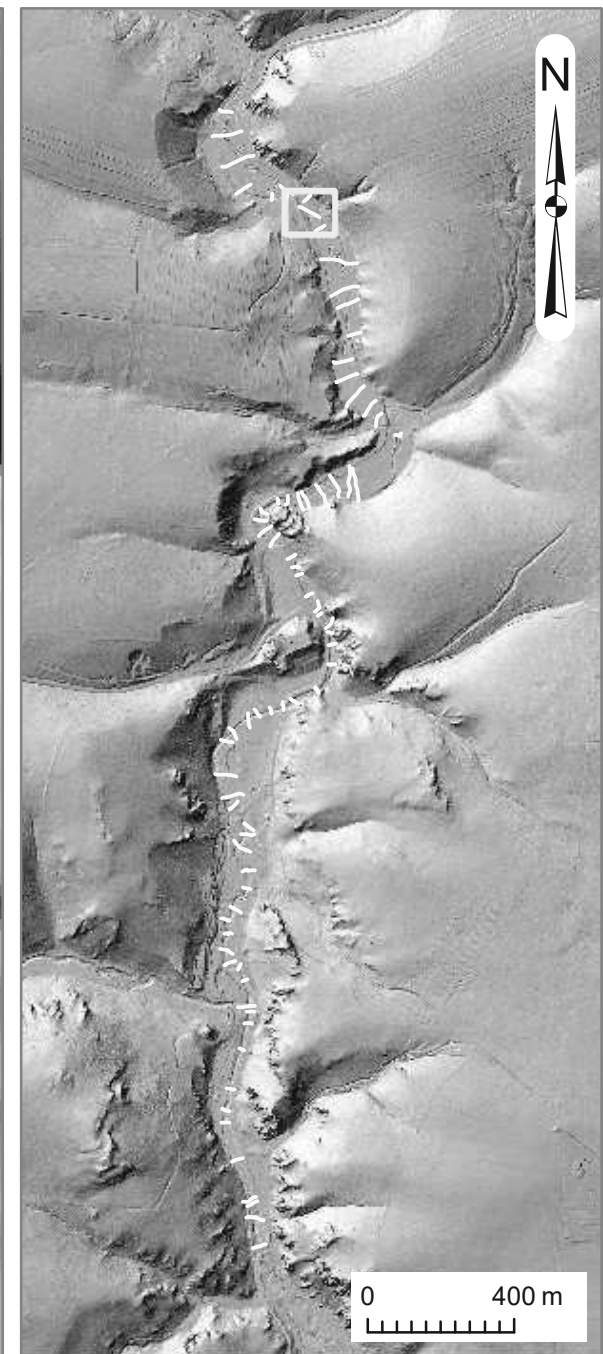

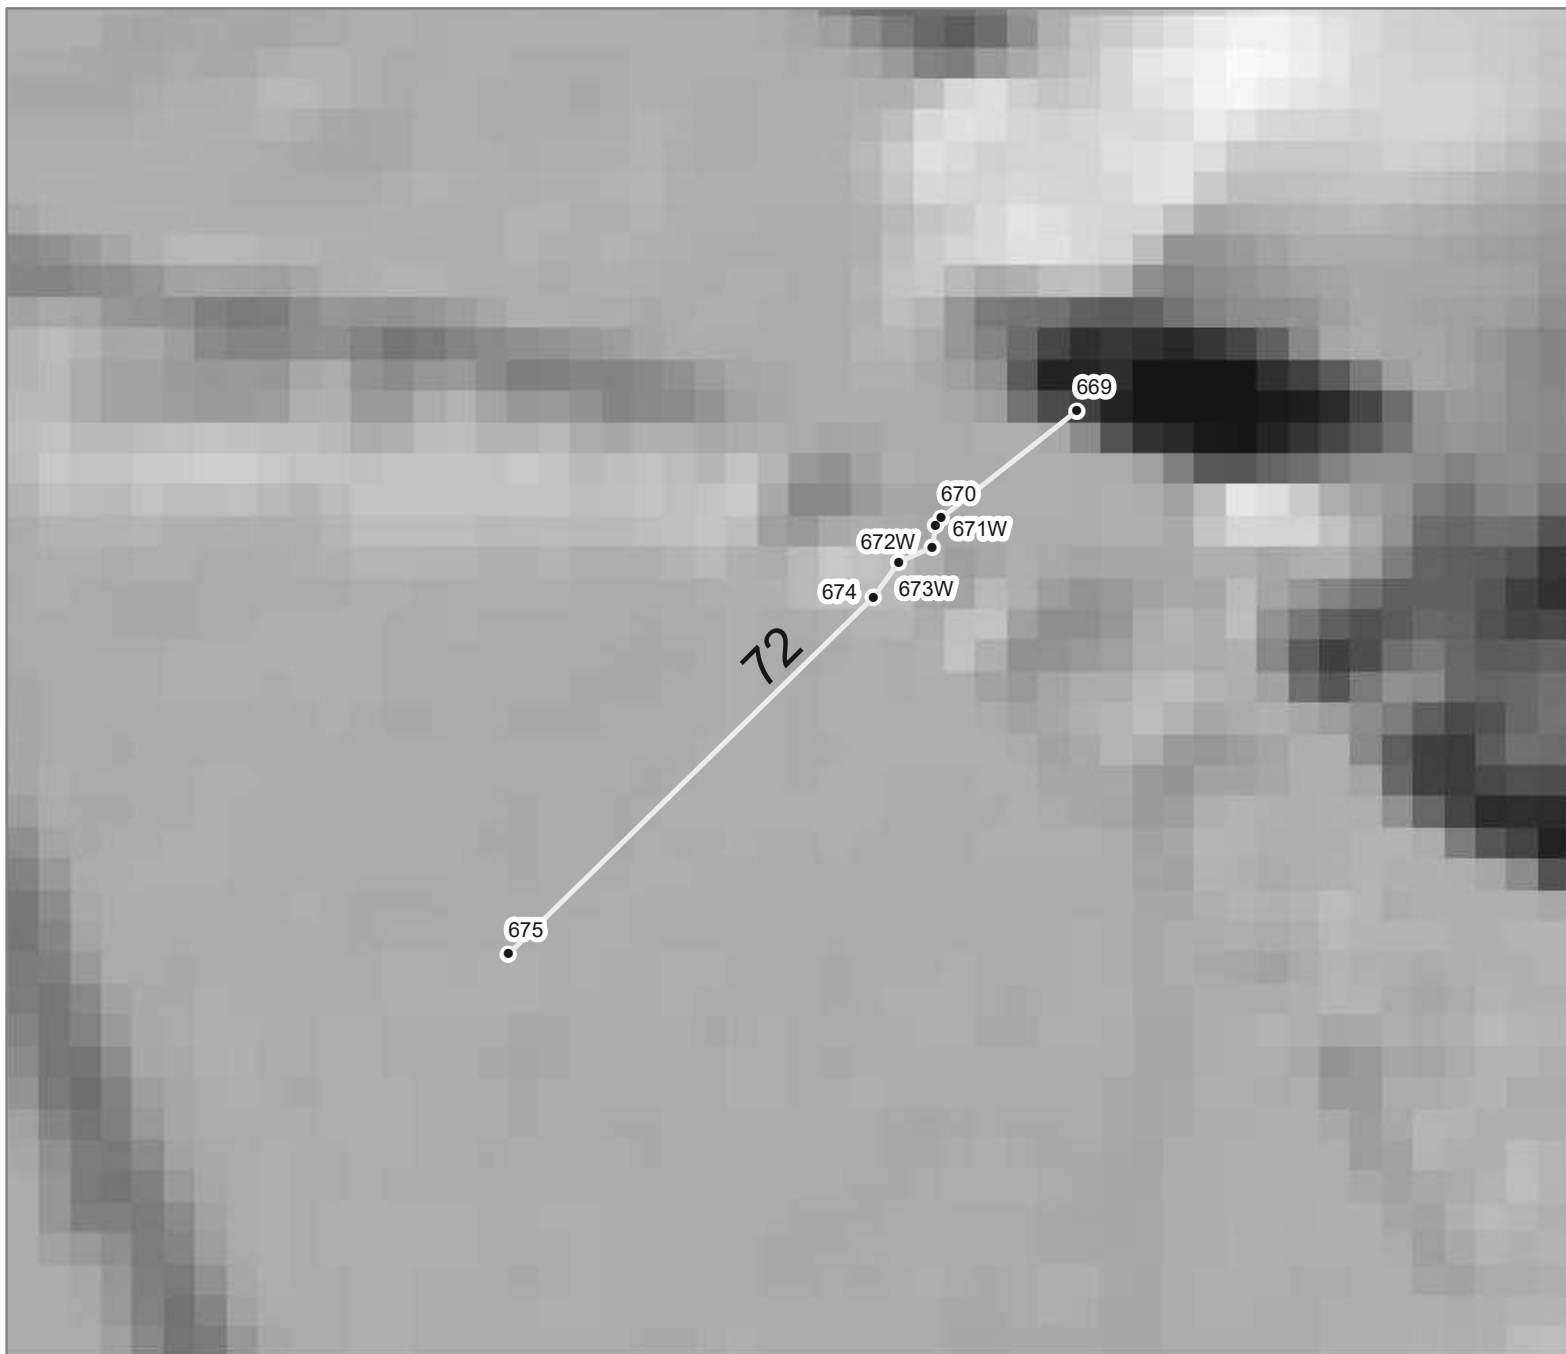

0 10 20 m

*Proile: 72* Analyses of the Prądnik riverbed shape based on archiva and contemporary data sets – old maps, LIDAR, DTMs and cross-sectional profile

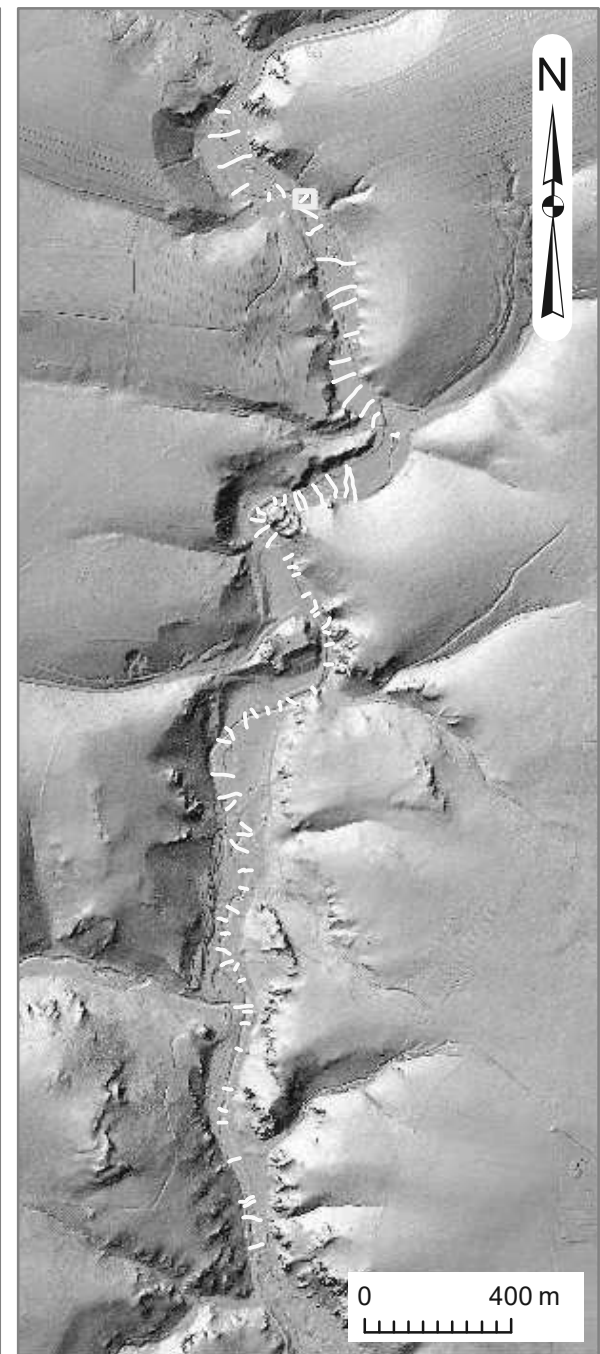

0 400 m

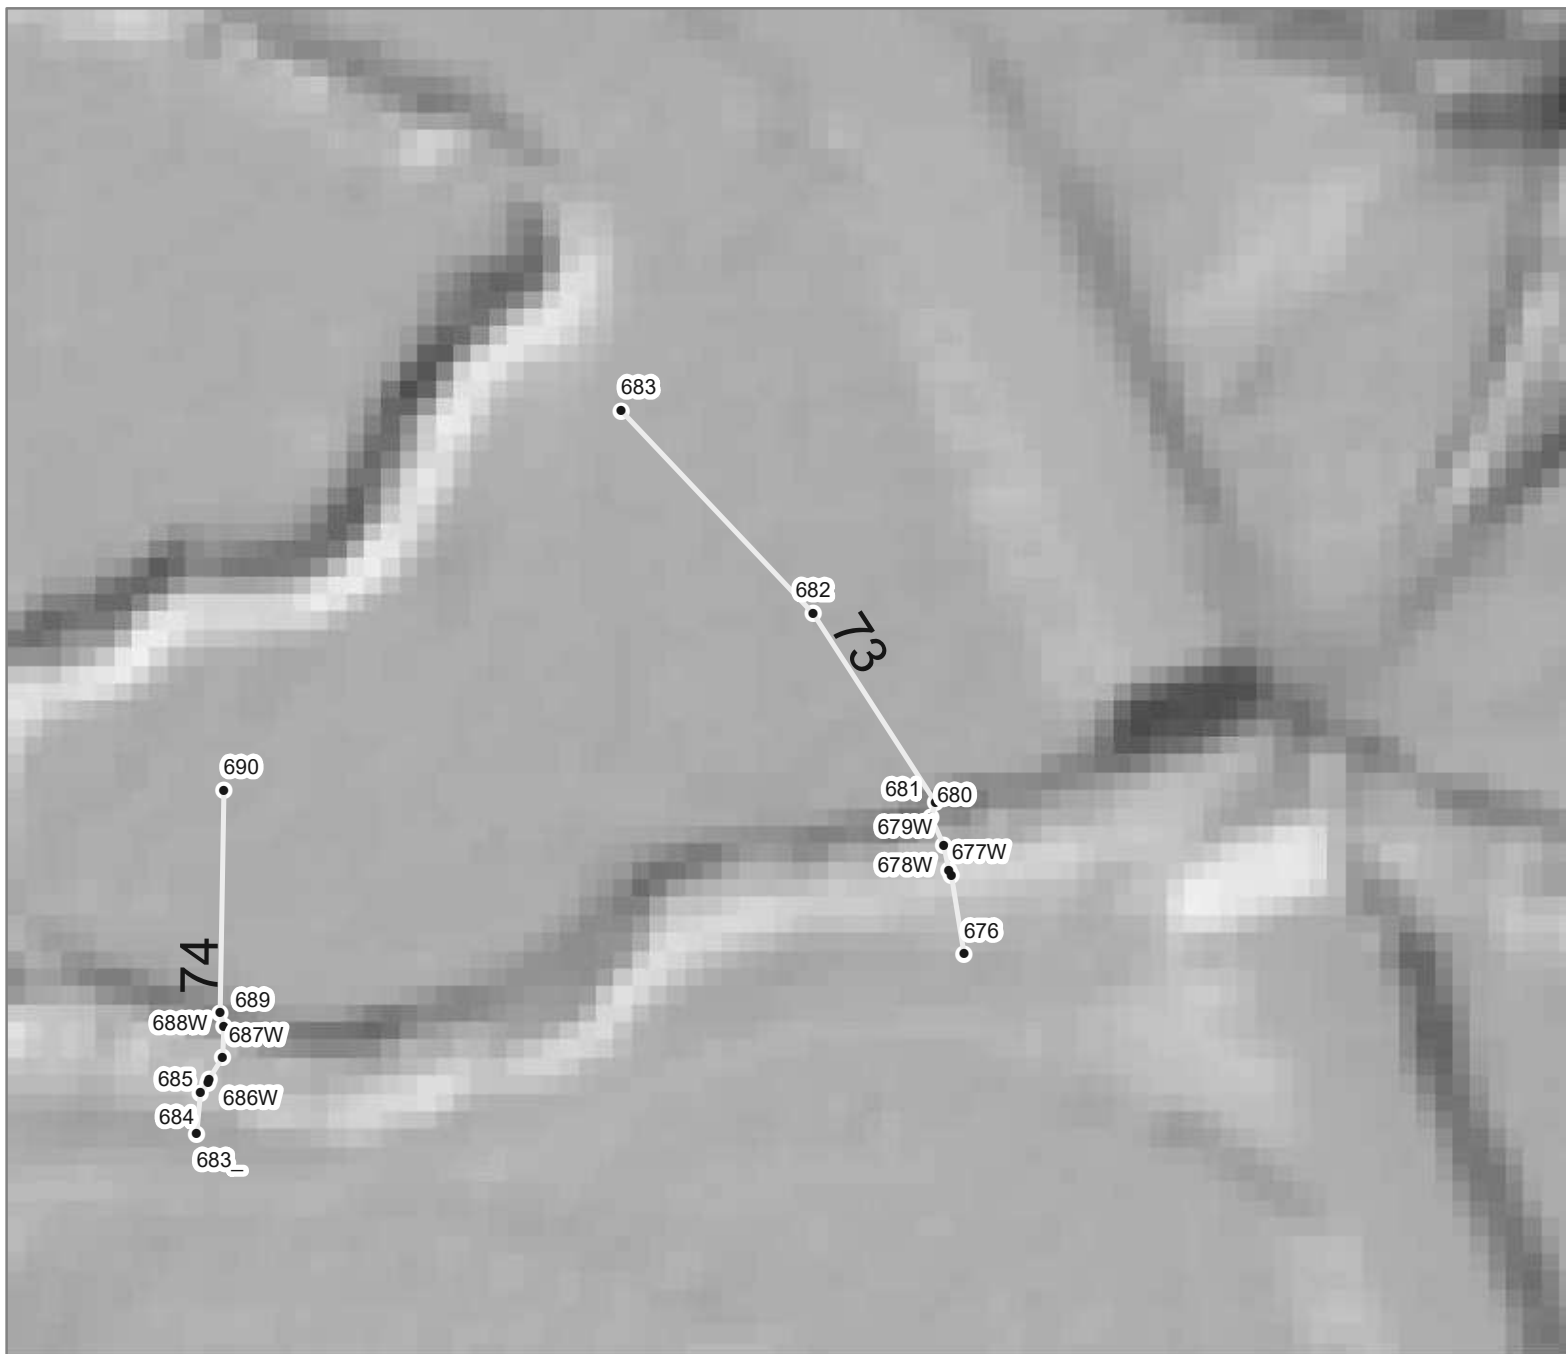

0 10 20 m

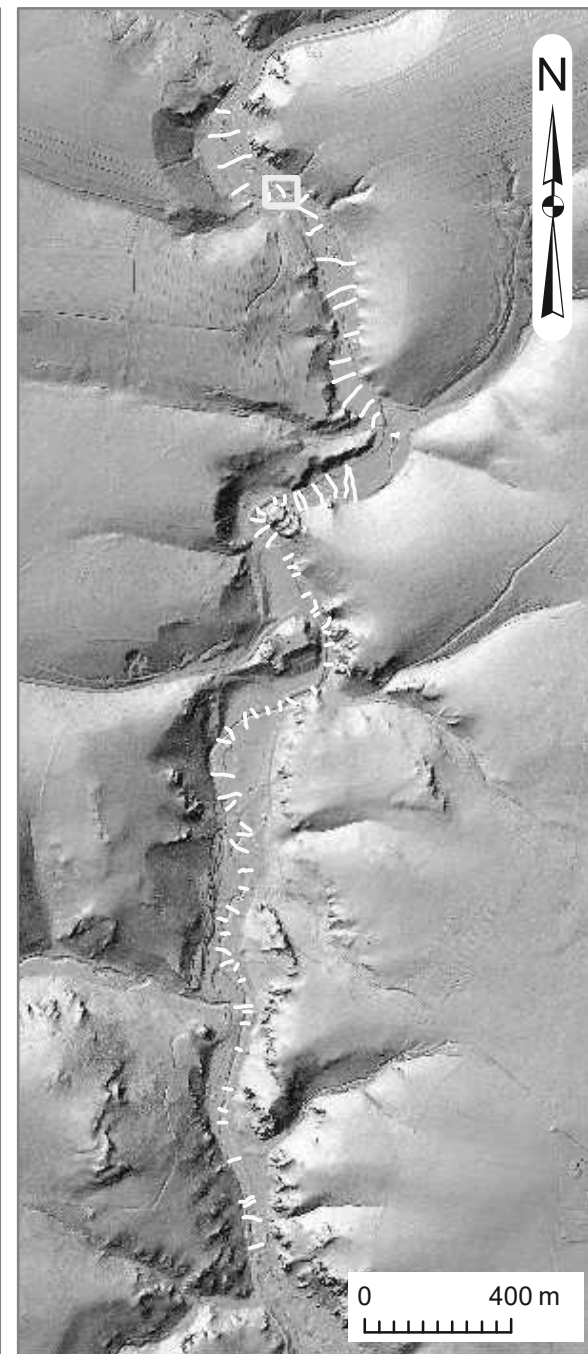

**Proile: 73** Analyses of the Prądnik riverbed shape based on archiva and contemporary data sets – old maps, LIDAR, DTMs and cross-sectional profile

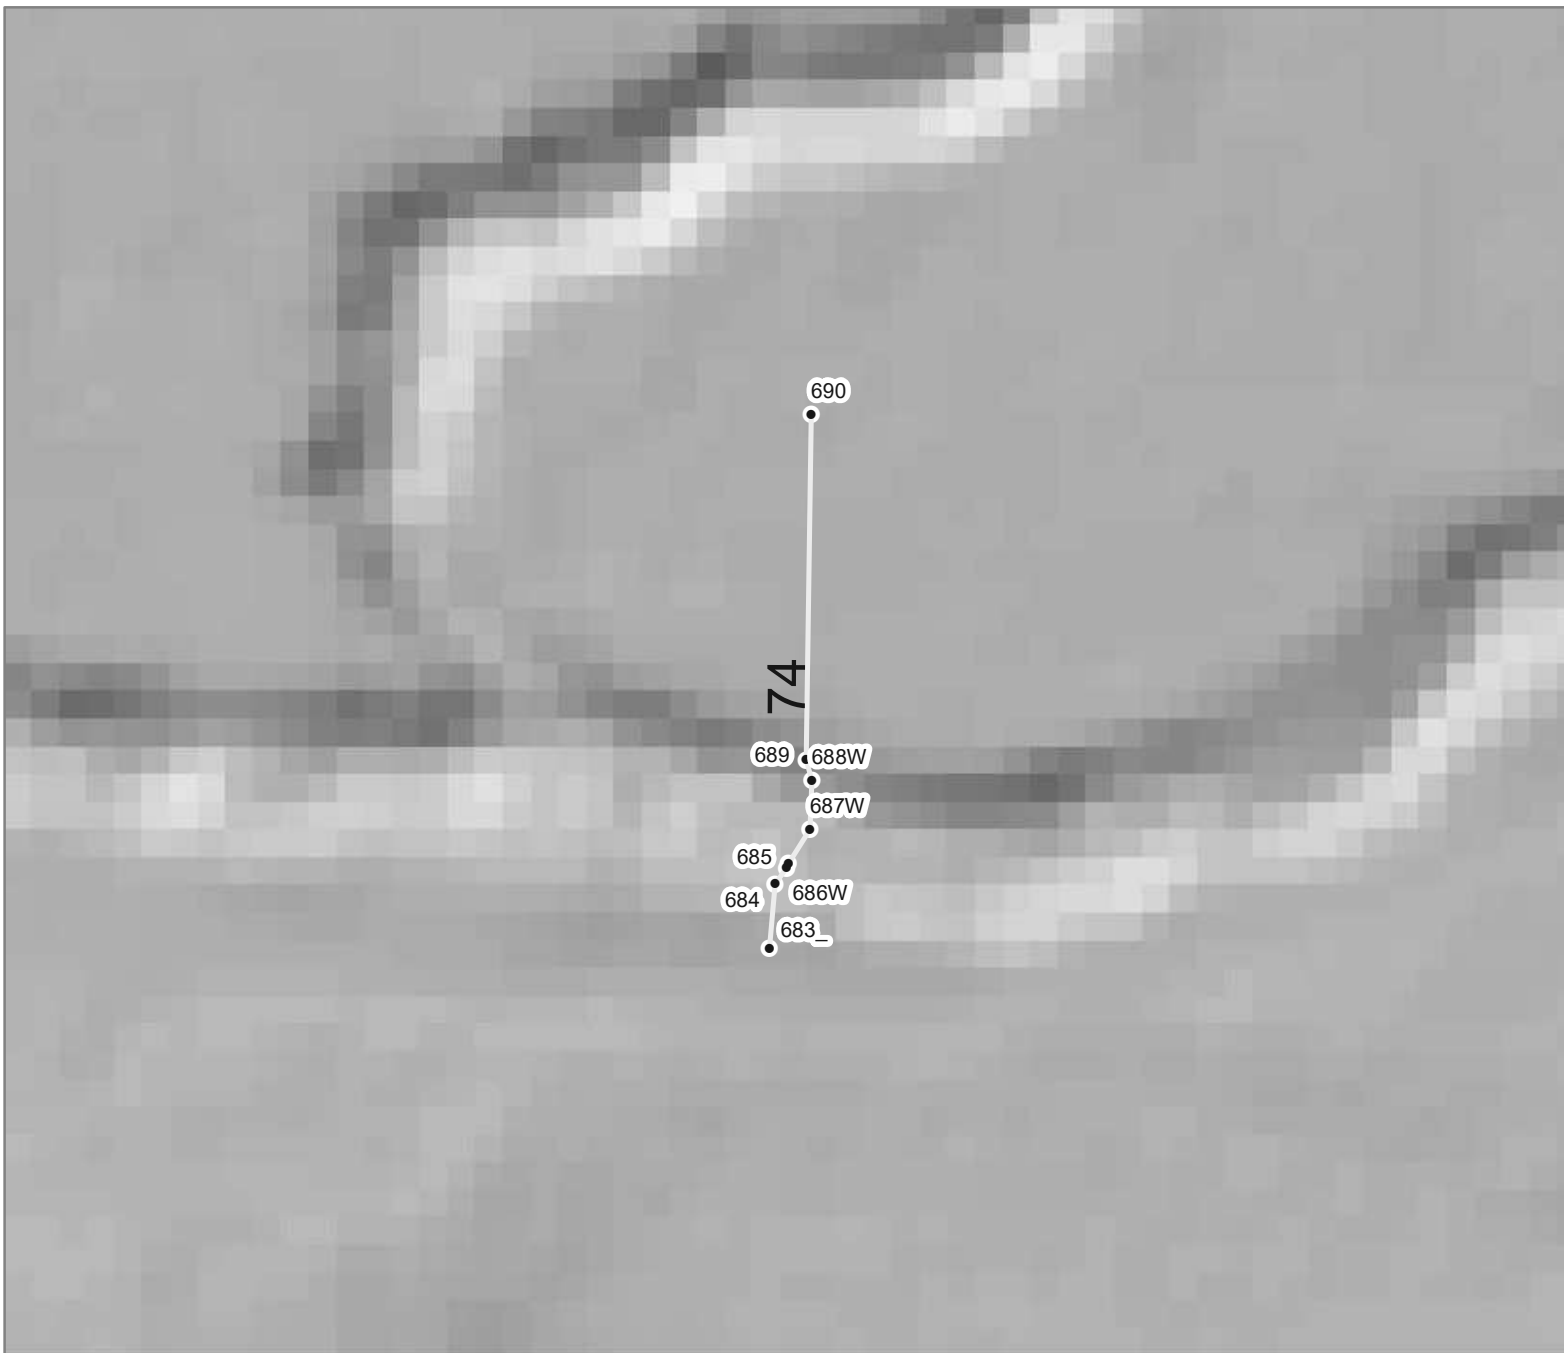

0 10 20 m

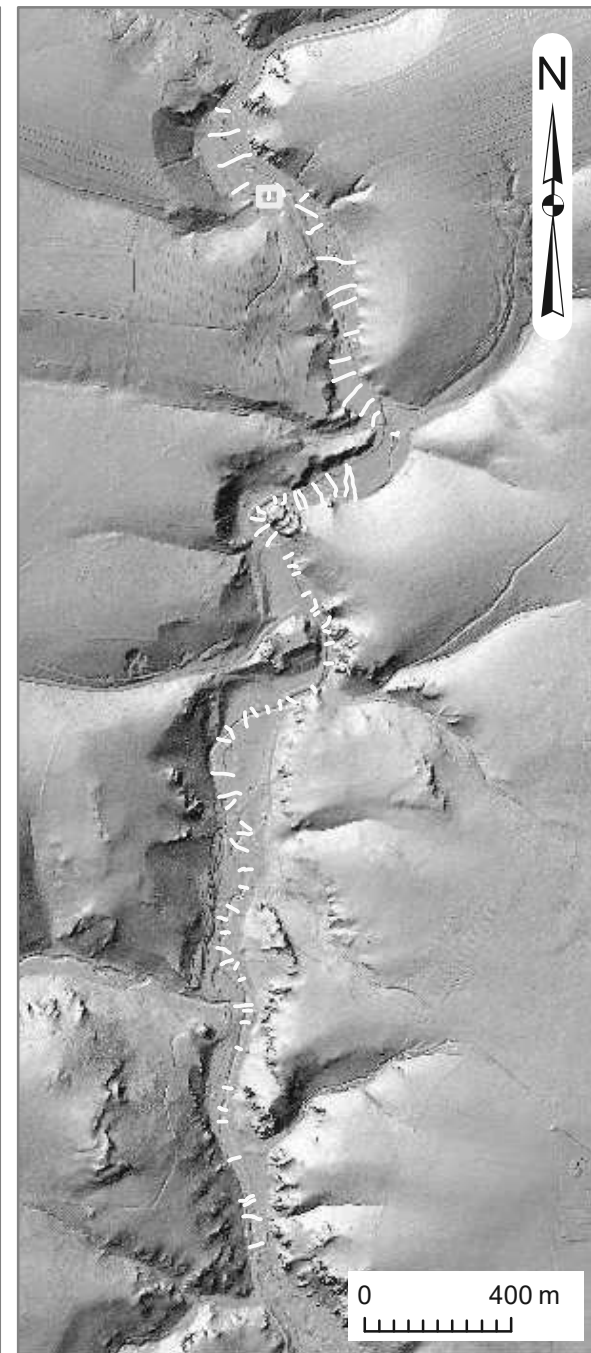

*Proile: 74* Analyses of the Prądnik riverbed shape based on archiva and contemporary data sets – old maps, LIDAR, DTMs and cross-sectional profile



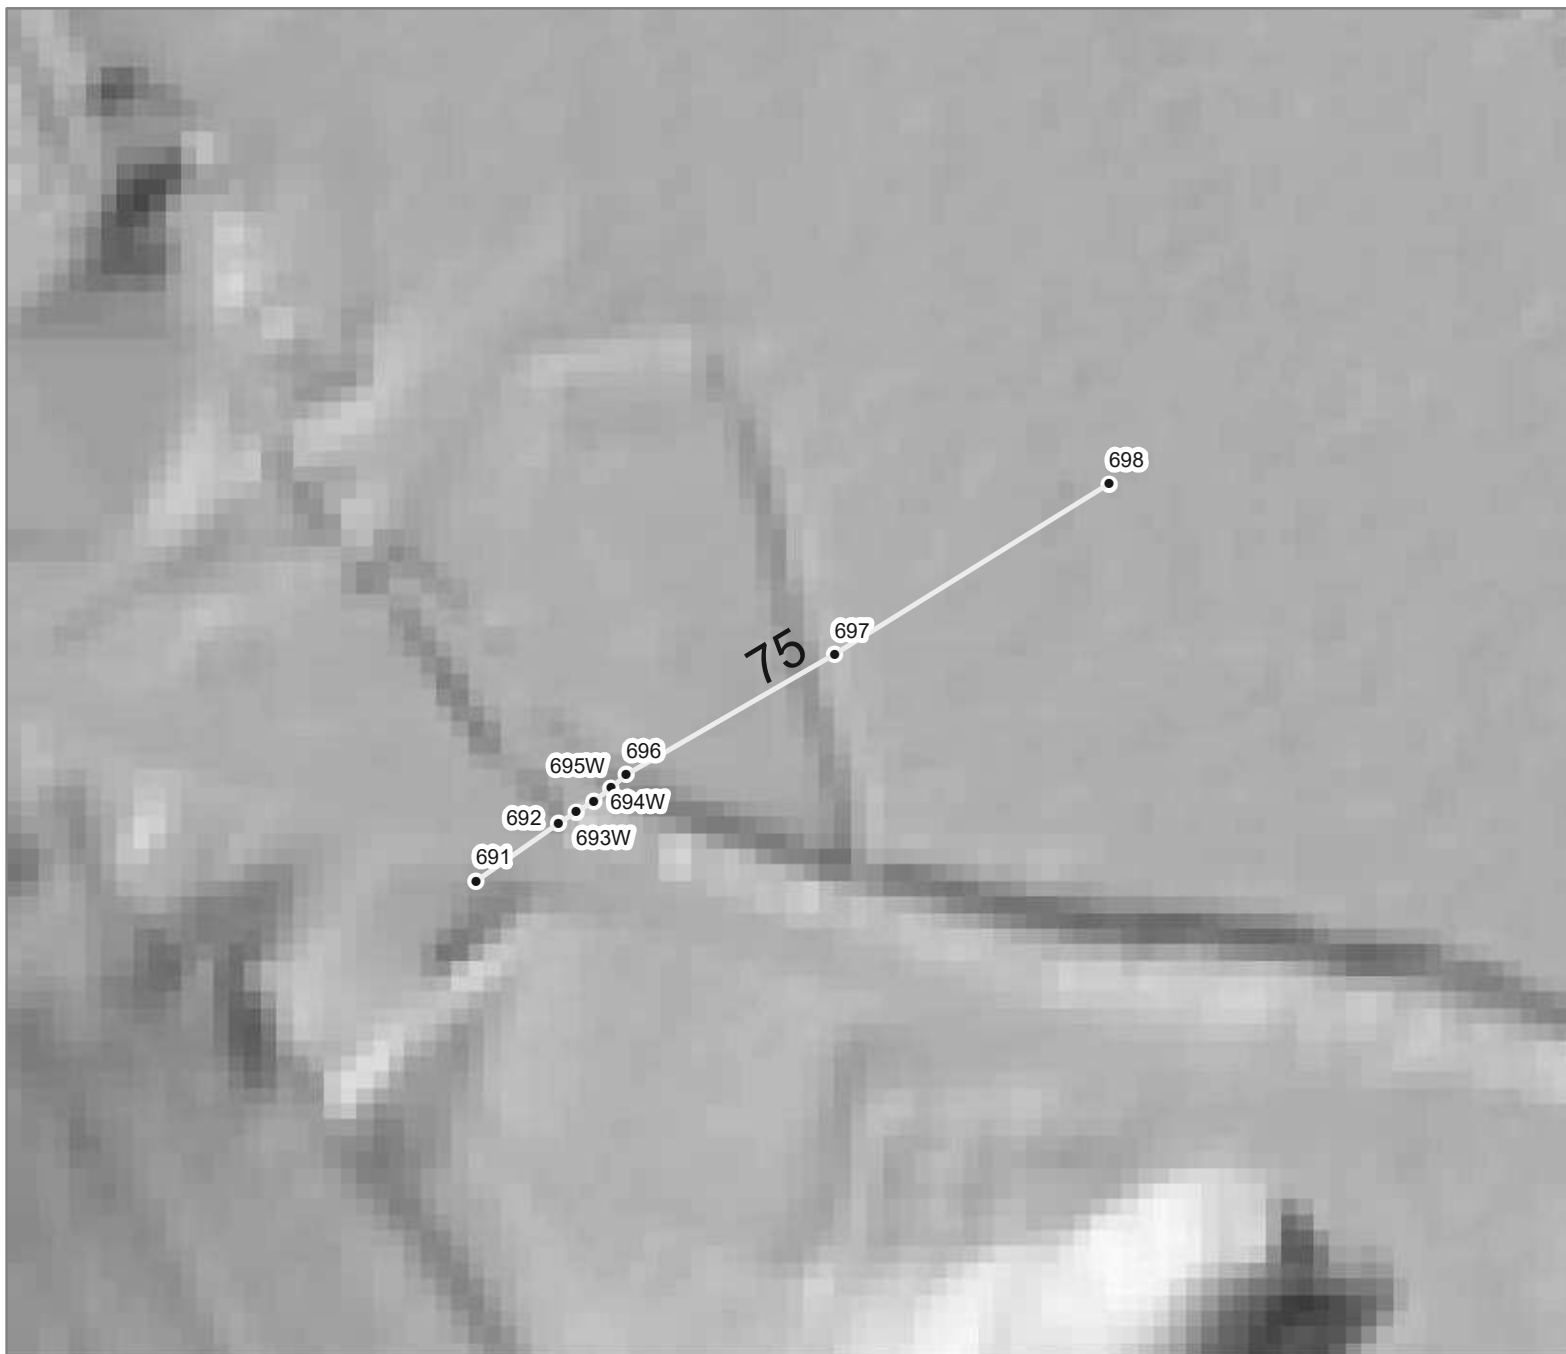

0 10 20 m

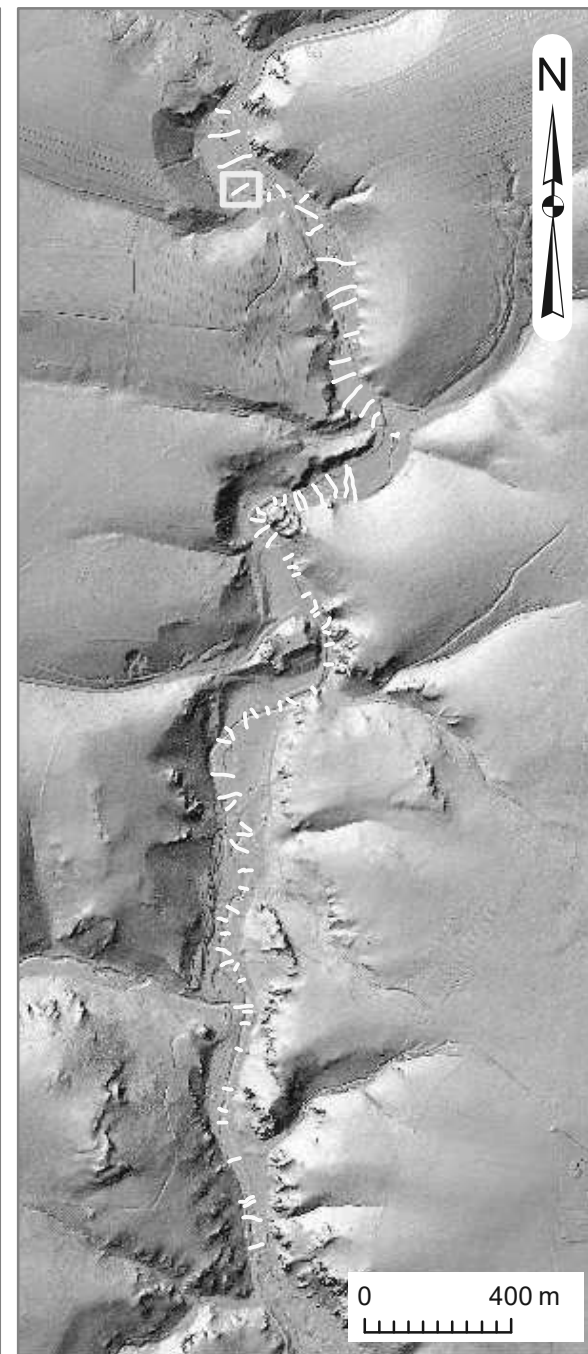

*Proile: 75* Analyses of the Prądnik riverbed shape based on archiva and contemporary data sets – old maps, LIDAR, DTMs and cross-sectional profile

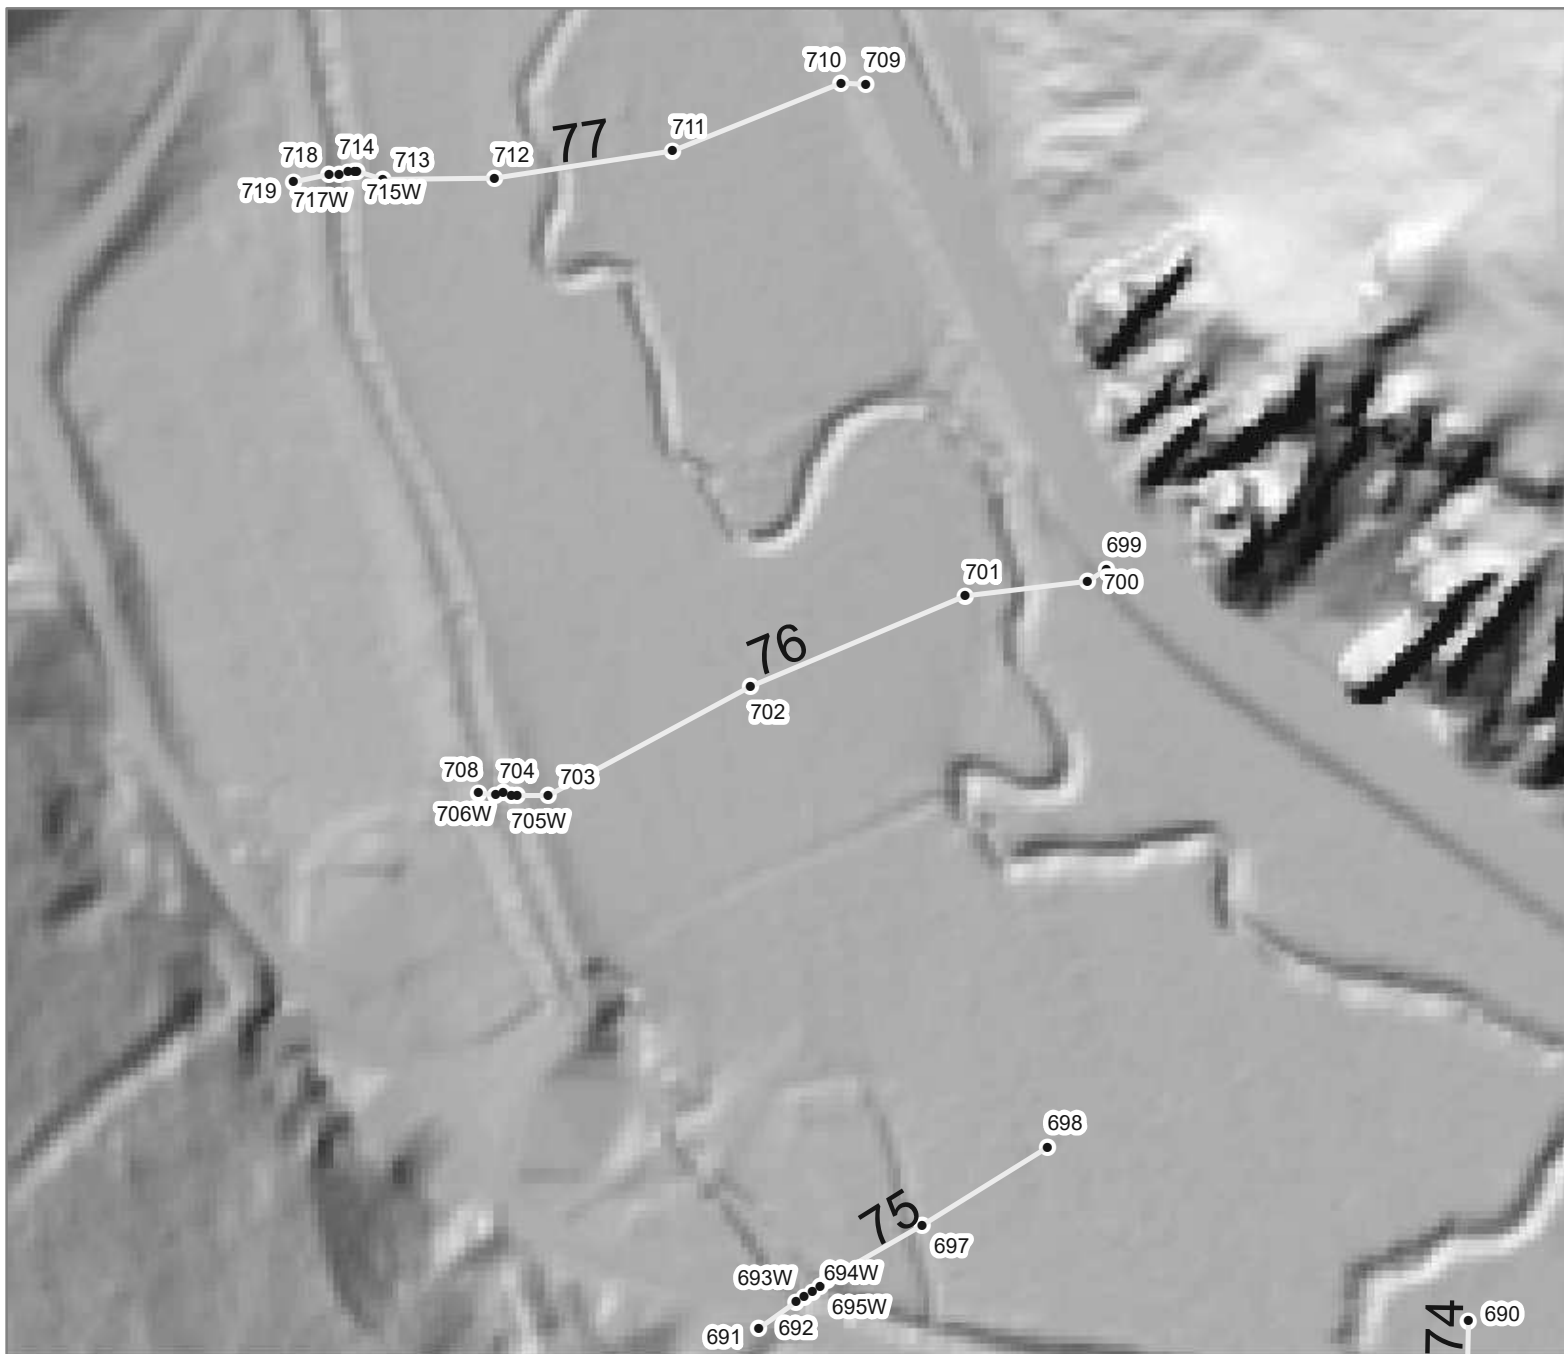

0 10 20 m

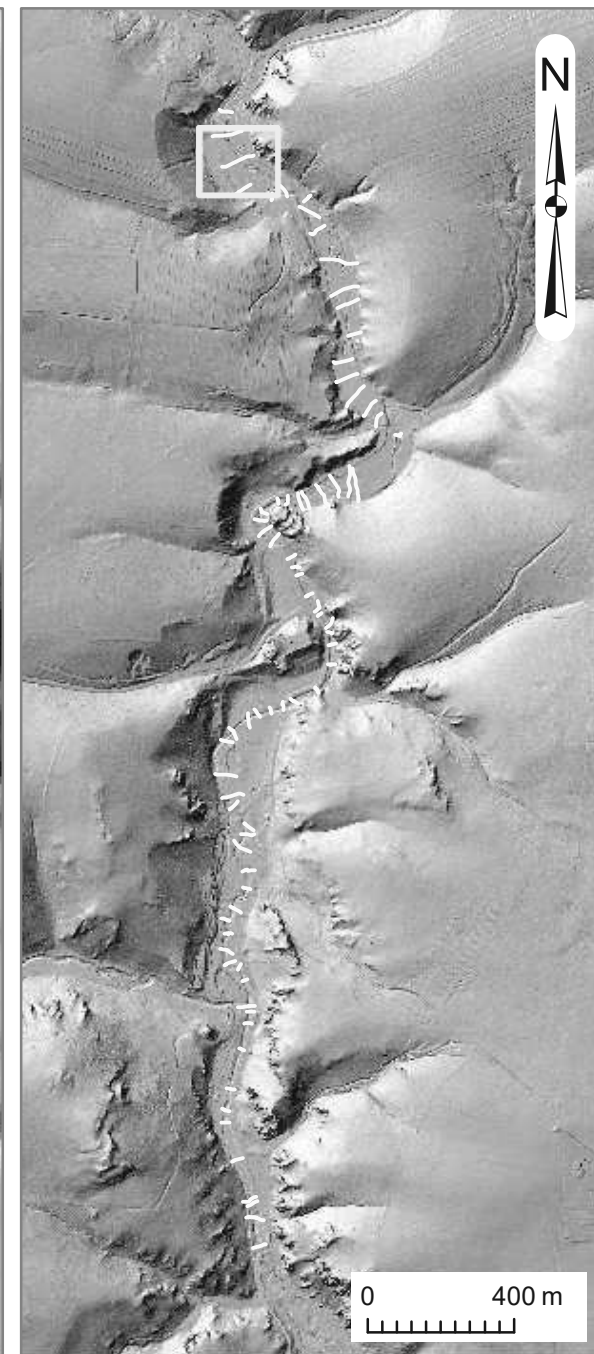

*Proile: 76* Analyses of the Prądnik riverbed shape based on archiva and contemporary data sets – old maps, LIDAR, DTMs and cross-sectional profile

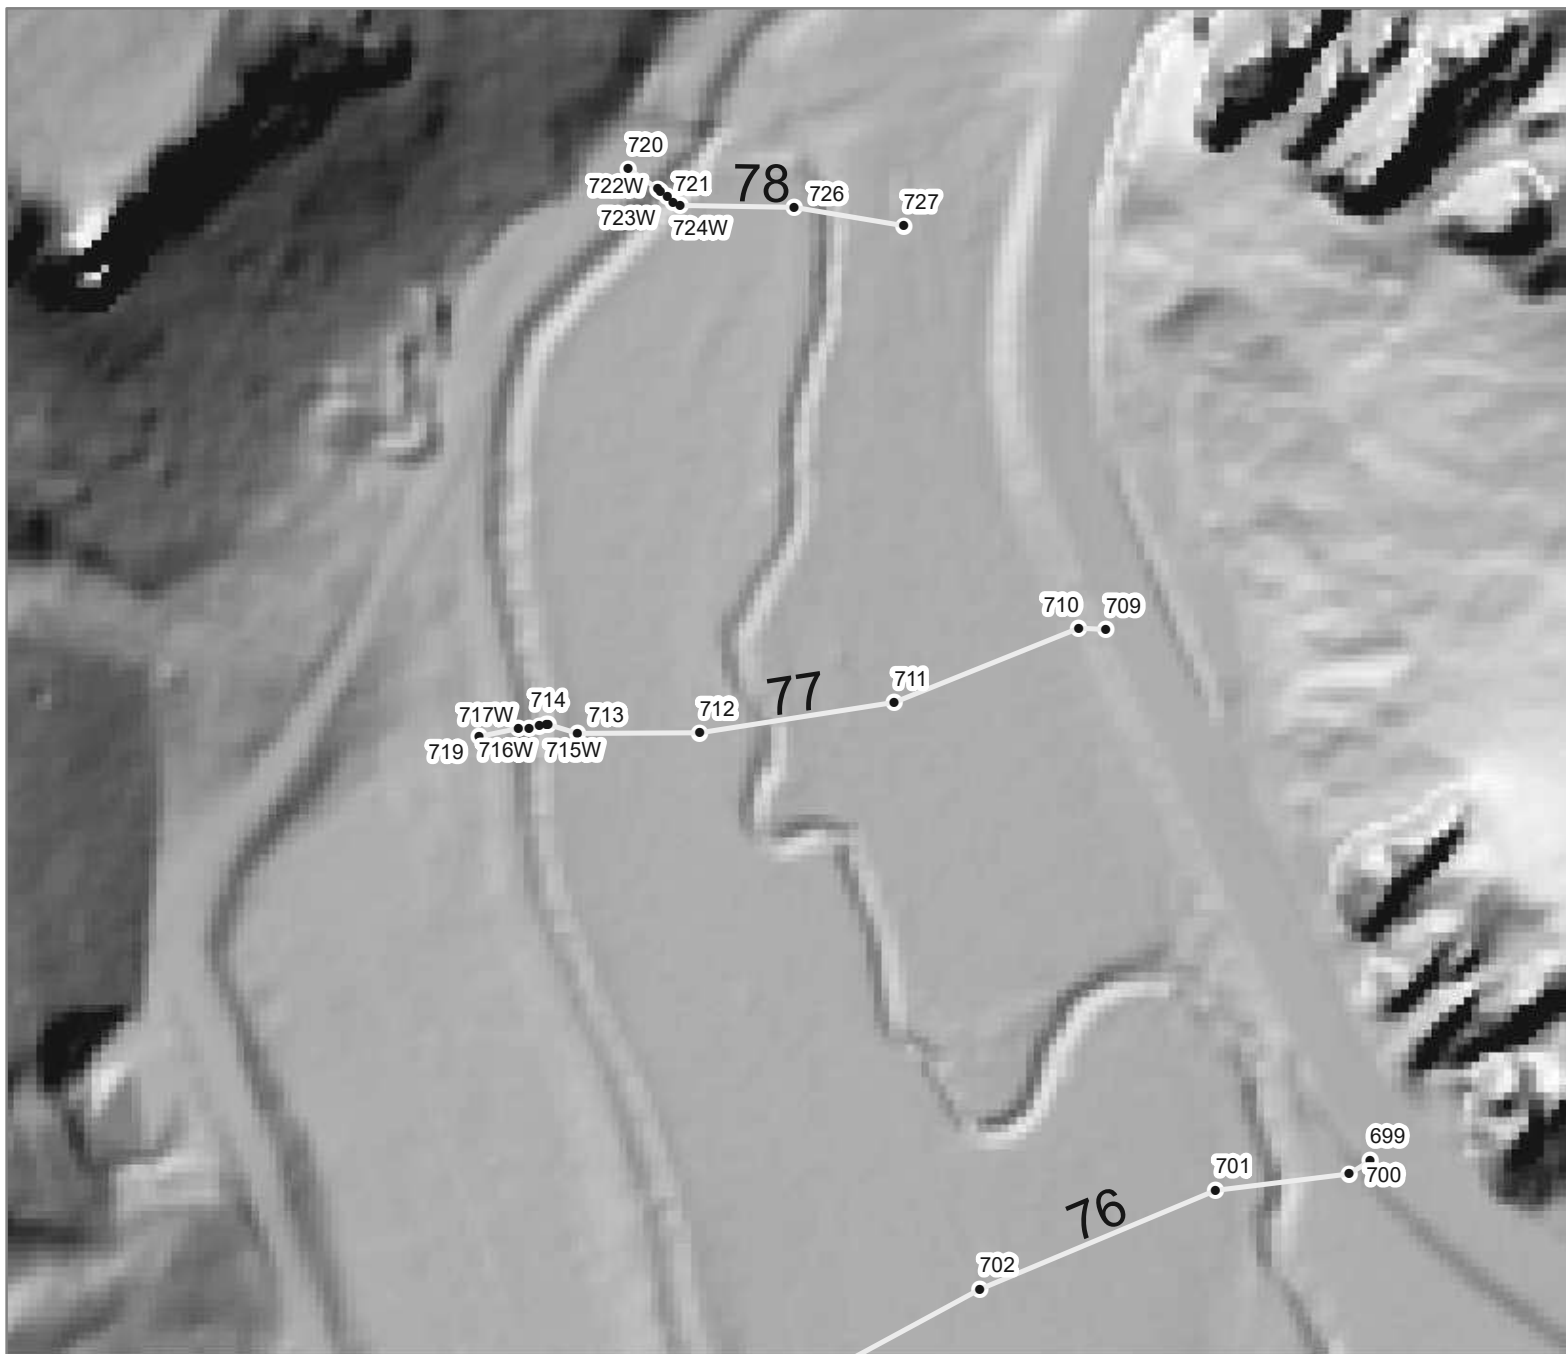

0 10 20 m

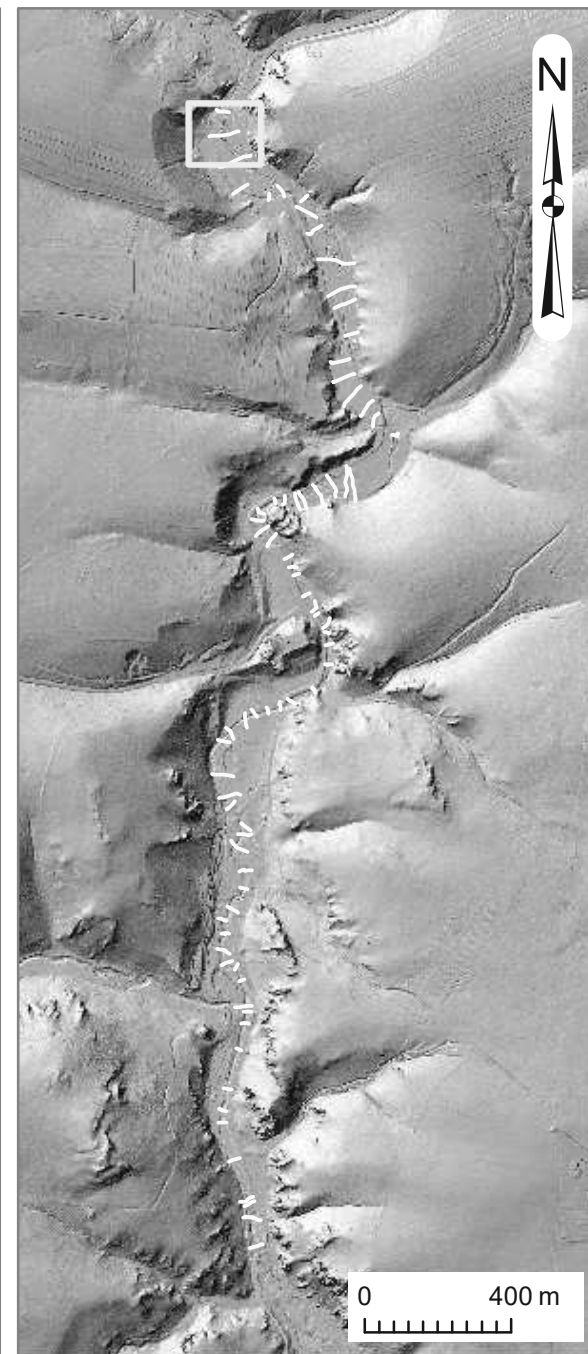

0 400 m

*Proile: 77* Analyses of the Prądnik riverbed shape based on archiva and contemporary data sets – old maps, LIDAR, DTMs and cross-sectional profile

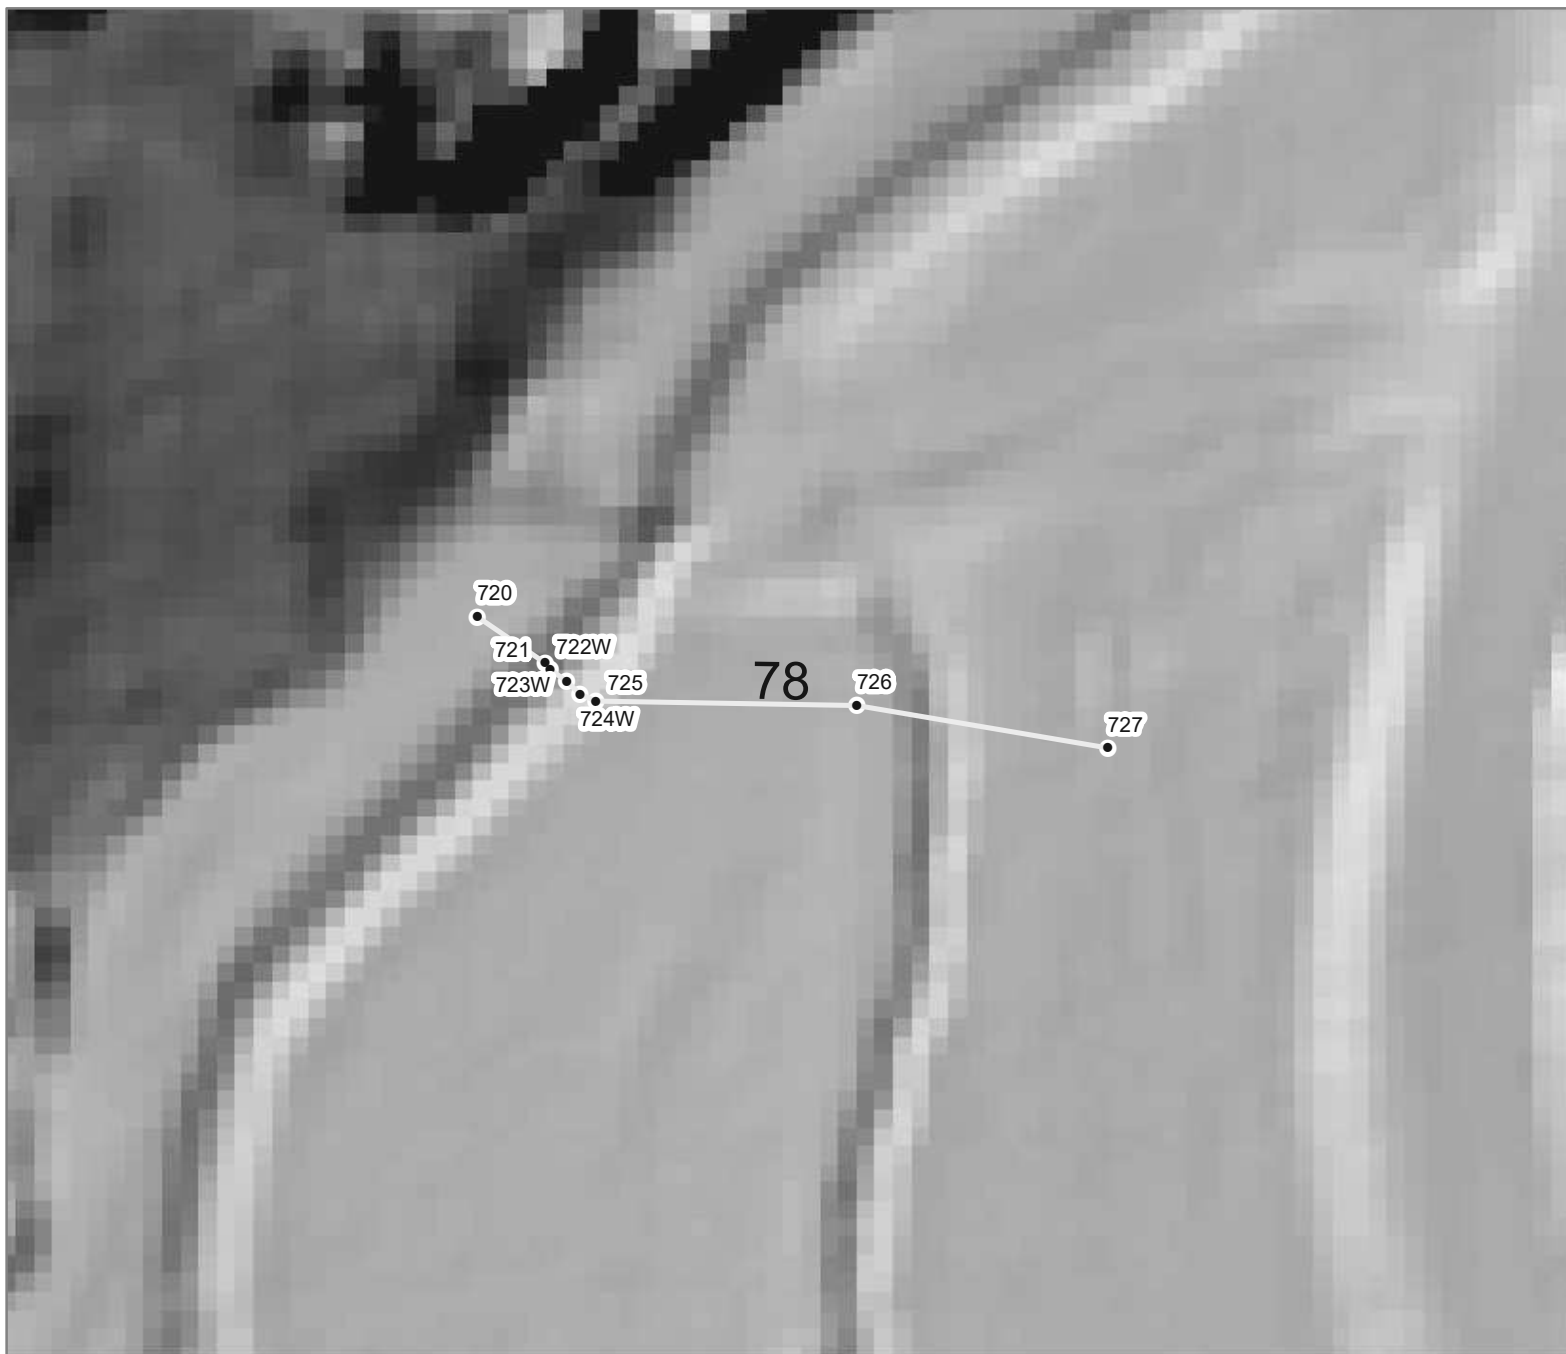

0 10 20 m

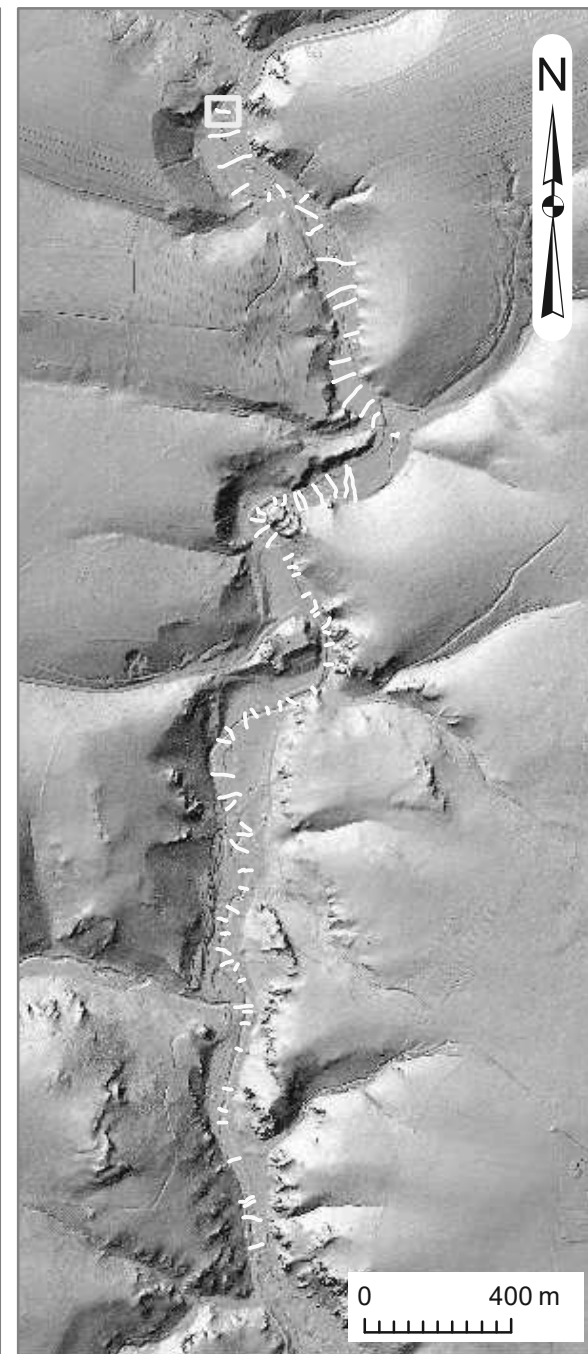

*Proile: 78* Analyses of the Prądnik riverbed shape based on archiva and contemporary data sets – old maps, LIDAR, DTMs and cross-sectional profile
