# Supplementary material
Source: MDPI journal article supplement (https://www.mdpi.com/2072-4292/12/14/2208)
Supplement: s1 [file s1]

Table S1 - All used data and its characteristic

| Name                          | Level of detail                     | Accuracy                                            | Data type           | File Format               | Acquisition time | Publisher                              | Processing                                              | Original coordinate system or projection/ellipsoid (EPSG code) |
|-------------------------------|-------------------------------------|-----------------------------------------------------|---------------------|---------------------------|------------------|----------------------------------------|---------------------------------------------------------|----------------------------------------------------------------|
| DTM ISOK                      | 1m <sup>(1)</sup>                   | 0.5m (xy)<br>0.15-0.30m (H)                         | Raster              | GRID                      | 2013             | GUGiK/GGK                              | Compared to cross section profile survey, hillshaded    | PL-1992 /WGS84 (2180)                                          |
| DTM ONP                       | 0.5m <sup>(1)</sup>                 | 0.25m (xy)<br>0.30m (H)                             | Raster              | GeoTIFF                   | 2012             | ONP                                    | Compared to cross section profile survey, hillshaded    | PL-1992 /WGS84 (2180)                                          |
| ISOK point cloud              | 4pts/m <sup>2</sup> <sup>(2)</sup>  | 0.25m                                               | Point cloud         | .las                      | 2013             | GUGiK/GGK                              | Compared to ONP point cloud                             | PL-1992 /WGS84 (2180)                                          |
| ONP point cloud               | 20pts/m <sup>2</sup> <sup>(2)</sup> | 0.2m                                                | Point cloud         | .las                      | 2012             | ONP                                    | Compared to ISOK point cloud                            | PL-1992 /WGS84 (2180)                                          |
| Corss section profiles survey | Profiles measured app. every 110 m  | 0.043m (xy)<br>0.013m (H)                           | Points              | ESRI Shapefile/ DBF/ XLSX | 2019             | Own work                               | Measured, calculated, drew, compared to DTMs            | PL-2000 zone 7/WGS84 (2177)                                    |
| Orthophotomap 2003            | 0.25m <sup>(1)</sup>                | 0.75m                                               | Raster              | GeoTIFF                   | 2003             | GUGiK/GGK                              | Vectorised                                              | PL-1992 /WGS84 (2180)                                          |
| Orthophotomap 2009            | 0.25m <sup>(1)</sup>                | 0.75m                                               | Raster              | GeoTIFF                   | 2009             | GUGiK/GGK                              | Vectorised                                              | PL-1992 /WGS84 (2180)                                          |
| Orthophotomap 2017            | 0.05m <sup>(1)</sup>                | 0.25m                                               | Raster              | GeoTIFF                   | 2017             | MWM                                    | Vectorised                                              | PL-1992 /WGS84 (2180)                                          |
| Orthophotomap 2019            | 0.25 <sup>(1)</sup>                 | 0.75m                                               | Raster              | GeoTIFF                   | 2019             | GUGiK/GGK                              | Vectorised                                              | PL-1992 /WGS84 (2180)                                          |
| Josephine map of Galicia      | 1:28,800 <sup>(3)</sup>             | Accuracy in relation to contemporary data is around | Scan of printed map | PNG                       | 1779-1783        | Administration of Archduchy of Austria | Georeferenced, vectorized, compared to ONP <sub>w</sub> | NaN                                                            |

|                                     |                          |                                                                            |                     |                |      |                                      |                                                         |                                |
|-------------------------------------|--------------------------|----------------------------------------------------------------------------|---------------------|----------------|------|--------------------------------------|---------------------------------------------------------|--------------------------------|
|                                     |                          | 100 m and maximum 170 m                                                    |                     |                |      |                                      |                                                         |                                |
| Ojców Bazaar map                    | 1:100,000 <sup>(3)</sup> | Accuracy in relation to contemporary data is around 50 m and maximum 100 m | Scan of printed map | JPG            | 1907 | Ojców Bazaar                         | Georeferenced, vectorised, compared to ONP <sub>w</sub> | NaN                            |
| Russian and Soviet "two-verst"      | 1:84,000 <sup>(3)</sup>  | Accuracy in relation to contemporary data is around 30 m and maximum 50 m  | Scan of printed map | JPG            | 1914 | Administration of the Russian Empire | Georeferenced, vectorised, compared to ONP <sub>w</sub> | Muffling polyhedric projection |
| WIG 25k                             | 1:25,000 <sup>(3)</sup>  | Accuracy up to several meters                                              | Scan of printed map | TIFF           | 1935 | WIG                                  | Georeferenced, vectorised, compared to ONP <sub>w</sub> | Borowa Góra 1925/Bessel1841    |
| Godfryd Ossowski map                | 1:10,000 <sup>(3)</sup>  | Accuracy is on the level of several meters                                 | Scan of printed map | Raster, JPEG   | 1885 | PAU                                  | Georeferenced, vectorised, compared to ONP <sub>w</sub> | NaN                            |
| MPHP                                | 1:50,000 <sup>(4)</sup>  | Accuracy depends on source maps; above a dozen or so meters                | Vector              | ESRI Shapefile | 2010 | PGWWP                                | -                                                       | PL-1992 /WGS84 (2180)          |
| ONP <sub>w</sub> - ONP watercourses | 1:10,000 <sup>(4)</sup>  | Accuracy of object vertices 0.5-1 m                                        | Vector              | ESRI Shapefile | 2012 | ONP                                  | -                                                       | PL-1992 /WGS84 (2180)          |

|                |                         |                                               |               |                         |                                   |           |            |                                   |
|----------------|-------------------------|-----------------------------------------------|---------------|-------------------------|-----------------------------------|-----------|------------|-----------------------------------|
| BDOT10k - SWRS | 1:10,000 <sup>(4)</sup> | Accuracy of object vertices up to 1m          | Vector        | GDB                     | 2006 (geometry) 2013 (attributes) | GUGiK/GGK | -          | PL-1992 /WGS84 (2180)             |
| Topo10k92      | 1:10,000 <sup>(3)</sup> | Theoretical accuracy at 1m, practically lower | Raster/Vector | GeoTIFF/ES RI Shapefile | 1996/2002                         | MWM       | Vectorised | PL-1992 /WGS84 (2180)             |
| Topo10k65      | 1:10,000 <sup>(3)</sup> | Theoretical accuracy at 1m, practically lower | Raster/Vector | WMS/ ESRI Shapefile     | 1978-1979/ 1983-1986              | GUGiK/GGK | Vectorised | PUWG 1965 zone I/Krasowski (3120) |

**Level of detail:**

<sup>(1)</sup> – raster resolution, <sup>(2)</sup> – density of point cloud, <sup>(3)</sup> – map scale, <sup>(4)</sup> – vector data, map scale with corresponding level of detail

**Publishers:**

GUGiK - Head Office of Geodesy and Cartography (pol. Główny Urząd Geodezji i Kartografii)

GGK – Surveyor general of Poland (pol. Główny Geodeta Kraju)

MWM – The Marshal of the Małopolska Province (pol. Marszałek Województwa Małopolskiego)

PGWWP - "Wody Polskie" National Water Holding (pol. Państwowe Gospodarstwo Wodne Wody Polskie)

ONP – Ojców National Park (pol. Ojcowski Park Narodowy)

PAU – Polish Academy of Arts and Sciences (pol. Polska Akademia Umiejętności)

WIG - Military Geographical Institute (pol. Wojskowy Instytut Geograficzny)
